# Supplementary material for: Characteristics of Mycobacterium tuberculosis PtpA interaction and activity on the alpha subunit of human mitochondrial trifunctional protein, a key enzyme of lipid metabolism
Source: PubMed Central journal article supplement (PMC10325834; doi:10.3389/fcimb.2023.1095060), 2023-06-22
Supplement: DataSheet_1.pdf [file DataSheet_1.pdf]

ECHA\_HUMAN

1 10 20 30 40

ECHA\_HUMAN
tr|A0A4R6XLA8|A0A4R6XLA8\_9GAMM
tr|A0A6A01JT2|A0A6A01JT2\_9BACT
tr|A0A7V3QZU7|A0A7V3QZU7\_9BACT
tr|A0A7V4SYJ6|A0A7V4SYJ6\_9BACT
tr|A0A2A8D2N6|A0A2A8D2N6\_9BACT
tr|A0A2N1TGP0|A0A2N1TGP0\_9SPIR
tr|A0A1G3QGW4|A0A1G3QGW4\_9SPIR
tr|A0A1G3QTY3|A0A1G3QTY3\_9SPIR
tr|A0A7X9L359|A0A7X9L359\_9DELTA
tr|A0A522CJY0|A0A522CJY0\_9SPIR
tr|A0A2N1RRJ3|A0A2N1RRJ3\_9SPIR
tr|A0A2N2KFN7|A0A2N2KFN7\_9DELTA
tr|A0A1V6AXX9|A0A1V6AXX9\_9DELTA
tr|A0A2N2HZL0|A0A2N2HZL0\_9DELTA
tr|A0A5E8ARP3|A0A5E8ARP3\_9BACT
tr|A0A662A7B1|A0A662A7B1\_9BACT
tr|D7CV16|D7CV16\_TRURR
tr|A0A3C2AKX4|A0A3C2AKX4\_9FLAO
tr|A0A3B8ZLN3|A0A3B8ZLN3\_9PLAN
tr|A0A345UGV8|A0A345UGV8\_9BACT
tr|A0A6C1P6A2|A0A6C1P6A2\_9BACT
tr|A0A3MLX9W8|A0A3MLX9W8\_9BACT
tr|A0A354C796|A0A354C796\_9DELTA
tr|A0A3M1NUM8|A0A3M1NUM8\_9BACT
tr|A0A3M2KRC8|A0A3M2KRC8\_9BACT
tr|A0A5S9IHR0|A0A5S9IHR0\_9BACT
tr|A0A6M1ST81|A0A6M1ST81\_9BACT
tr|A0A521AAE5|A0A521AAE5\_9BACT
tr|A0A1M4ZMD6|A0A1M4ZMD6\_9BACT
tr|A0A2A2GCS2|A0A2A2GCS2\_9BACT
tr|A0A5D3YIH7|A0A5D3YIH7\_9BACT
tr|A0A6M1T9G0|A0A6M1T9G0\_9BACT
tr|A0A6A8Q1Y8|A0A6A8Q1Y8\_9BACT
tr|A0A521BVJ3|A0A521BVJ3\_9BACT
tr|A0A359E0Y8|A0A359E0Y8\_9BACT
tr|A0A2D8CIM6|A0A2D8CIM6\_9BACT
tr|A0A2D9FWF5|A0A2D9FWF5\_9BACT
tr|A0A1B6YB70|A0A1B6YB70\_9BACT
tr|A0A2D4ZTC0|A0A2D4ZTC0\_9BACT
tr|A0A3D4UVW7|A0A3D4UVW7\_9BACT
tr|A0A3F3I3M2|A0A3F3I3M2\_9BACT
tr|A0A3D1G7L9|A0A3D1G7L9\_9BACT
tr|A0A3M8G1Y8|A0A3M8G1Y8\_9BACT
tr|A0A5Q4F391|A0A5Q4F391\_9BACT
tr|A0A6I7NPV0|A0A6I7NPV0\_9BACT
tr|A0A651G1J2|A0A651G1J2\_9BACT
tr|A0A371QRK5|A0A371QRK5\_9BACT
tr|A0A2N0VGJ5|A0A2N0VGJ5\_9BACT
tr|A0A316TYJ0|A0A316TYJ0\_9BACT
tr|A0A651GLZ8|A0A651GLZ8\_9BACT
tr|A0A7Y5V3S5|A0A7Y5V3S5\_9BACT
tr|A0A7W1SHC0|A0A7W1SHC0\_9BACT
tr|A0A7Y5PBT7|A0A7Y5PBT7\_9BACT
tr|A0A7Y5TXL8|A0A7Y5TXL8\_9BACT
tr|A0A423PQ96|A0A423PQ96\_9GAMM
tr|U2G066|U2G066\_9GAMM
tr|A0A2E0J1F4|A0A2E0J1F4\_9GAMM
tr|A0A2D4SCM8|A0A2D4SCM8\_9GAMM
tr|LOWJH1|LOWJH1\_9GAMM
tr|A0A1H5XF61|A0A1H5XF61\_9GAMM
tr|A0A2E9TS48|A0A2E9TS48\_9GAMM
tr|A0A095UE19|A0A095UE19\_9GAMM
tr|A0A7G2S9A0|A0A7G2S9A0\_9GAMM
tr|B5JU27|B5JU27\_9GAMM
tr|A0A1Y0IHP1|A0A1Y0IHP1\_9GAMM
tr|A0A316FZ14|A0A316FZ14\_9GAMM
tr|A0A498C231|A0A498C231\_9GAMM
tr|Q0A6T4|Q0A6T4\_ALKEH
tr|A0A3E0WL10|A0A3E0WL10\_9GAMM
tr|A0A3S1BU16|A0A3S1BU16\_9GAMM
tr|A0A7V8QFN9|A0A7V8QFN9\_9GAMM
tr|A0A1H8PPF9|A0A1H8PPF9\_9GAMM
tr|A0A6H0J0V7|A0A6H0J0V7\_9GAMM
tr|V5EZX6|V5EZX6\_9VIBR
tr|A0A6I1QBM2|A0A6I1QBM2\_9VIBR
tr|A0A511QRL5|A0A511QRL5\_9VIBR
tr|A0A7Y0JZP4|A0A7Y0JZP4\_9VIBR
tr|A0A193KD24|A0A193KD24\_9VIBR
tr|A0A1S1HM72|A0A1S1HM72\_PROST
tr|A0A7T8I613|A0A7T8I613\_9GAMM
tr|A0A140NIF0|A0A140NIF0\_PROSM
tr|A0A379GMB7|A0A379GMB7\_PROST
tr|A0A379H393|A0A379H393\_PROST
tr|B2Q0L5|B2Q0L5\_PROST
tr|A0A6I3JUE9|A0A6I3JUE9\_9GAMM
tr|A0A7D4P594|A0A7D4P594\_YERMW
tr|A0A7U7IVK6|A0A7U7IVK6\_YEREN
tr|A0A447RIF5|A0A447RIF5\_YEREN
tr|A0A7H4ZLV9|A0A7H4ZLV9\_YERP4
tr|A0A0H3NX46|A0A0H3NX46\_YERE1
tr|A0A7T9XUV7|A0A7T9XUV7\_YEREN
tr|A0A7U7IYV8|A0A7U7IYV8\_YEREN
tr|A0A0H5G7G2|A0A0H5G7G2\_YEREN
tr|A0A2A7TDI2|A0A2A7TDI2\_YERKR
tr|A0A0T9M261|A0A0T9M261\_YERKR
tr|A0A0A0CMP1|A0A0A0CMP1\_PHOLU
tr|A0A329VG55|A0A329VG55\_9GAMM
sp|Q7N288|FADJ\_PHOLL
tr|A0A6L9JMX5|A0A6L9JMX5\_PHOLM
tr|A0A7X5HQ29|A0A7X5HQ29\_PHOLM
tr|A0A1C0U051|A0A1C0U051\_9GAMM
tr|A0A7X5QF62|A0A7X5QF62\_9GAMM

tr|A0A2D0KWM9|A0A2D0KWM9\_9GAMM . . . . . MALDETIMSA . . EQSVFS  
tr|A0A2D0LAI1|A0A2D0LAI1\_9GAMM . . . . . MALDETIMSA . . EQSVFS  
tr|A0A2D0IXC8|A0A2D0IXC8\_XENBU . . . . . MAQAEKEIIMSE . . TQSVFS  
tr|W1JAM5|W1JAM5\_9GAMM . . . . . MAQAEKETIMSE . . TQSVFS  
tr|A0A3D9UED3|A0A3D9UED3\_9GAMM . . . . . MAQAEKETIMSE . . TQSVFS  
tr|A0A1I3JCA9|A0A1I3JCA9\_9GAMM . . . . . MAQAEKETIMSTAQP . . TQSVFS  
tr|A0A068QUL9|A0A068QUL9\_9GAMM . . . . . MVQAEKATVISAAMQP . . EQSVFS  
tr|A0A0M0TCH6|A0A0M0TCH6\_9GAMM . . . . . MAQAEKETVMSAAMQPEQSVFR  
tr|A0A1Q5U854|A0A1Q5U854\_9GAMM . . . . . MVQAEKETVMSAAMQPDQSVFS  
tr|A0A2D0ISP1|A0A2D0ISP1\_9GAMM . . . . . MVQAEKETVMSAVMQPEQSVFS  
tr|A0A1Q5TUI8|A0A1Q5TUI8\_9GAMM . . . . . MAQTEKETVMSAAMQPEQSVFR  
tr|A0A2D0KJI7|A0A2D0KJI7\_9GAMM . . . . . MAQTEKETVISAAMQPEQSVFR  
tr|A0A1Y2SB97|A0A1Y2SB97\_9GAMM . . . . . MTQAEKETAVPAMQA . . EQSVFS  
tr|A0A1I5DWI7|A0A1I5DWI7\_9GAMM . . . . . MTQAEKETIVSAAQPEQSVFS  
tr|A0A1I7GWY6|A0A1I7GWY6\_9GAMM . . . . . MALAEKETVISTTQS . . NQSVFN  
tr|D3VKY8|D3VKY8\_XENNA . . . . . MAQAEKEVVILTKQSDRSVFN  
tr|A0A2G0Q6Q9|A0A2G0Q6Q9\_9GAMM . . . . . MAQAEKETVMSTTQP . . EQSVFS  
tr|A0A2D0JU24|A0A2D0JU24\_9GAMM . . . . . MAQSEQAEVMSSTTQP . . KQSVFN  
tr|A0A0J5FN38|A0A0J5FN38\_9GAMM . . . . . MAQAEQETVMSTTQP . . KQSVFN  
tr|A0A432XLD4|A0A432XLD4\_9GAMM . . . . . MS . . EQKAF T  
tr|A0A2D8HU84|A0A2D8HU84\_9GAMM . . . . . MS . . QDKAF T  
tr|A0A656X1Q2|A0A656X1Q2\_9GAMM . . . . . MS . . QDKAF T  
tr|A0A4Q1QH79|A0A4Q1QH79\_9GAMM . . . . . MS . . QDKAF T  
tr|A0A1G7LQE6|A0A1G7LQE6\_9GAMM . . . . . MS . . QDKAF T  
tr|A0A432YVG7|A0A432YVG7\_9GAMM . . . . . MS . . QDKAF T  
tr|A0A1J5N0P5|A0A1J5N0P5\_9GAMM . . . . . MS . . MSTF T  
tr|A0A0D8D548|A0A0D8D548\_9GAMM . . . . . MTEETTS . . SASAF T  
tr|A0A3E0TNN2|A0A3E0TNN2\_9GAMM . . . . . MTQVTTQTSKQAAEQAAEQAKNADNSVFT  
tr|A0A3E0UD67|A0A3E0UD67\_9GAMM . . . . . MTETTTQAG . . ENSVFS  
tr|A0A3E0U0P4|A0A3E0U0P4\_9GAMM . . . . . MTETTTQAG . . ENSVFS  
tr|A0A0M2V8B1|A0A0M2V8B1\_9GAMM . . . . . MTKQ . . QASSFS  
tr|A0A285ITY5|A0A285ITY5\_9GAMM . . . . . MTNK . . QQGSFS  
tr|A0A486XTB9|A0A486XTB9\_9GAMM . . . . . MT . . SSNSFS  
tr|I1E1G1|I1E1G1\_9GAMM . . . . . MT . . TTNSFS  
tr|A0A1H6KJ68|A0A1H6KJ68\_9GAMM . . . . . MT . . TTNSFS  
tr|A0A0X3Y764|A0A0X3Y764\_9GAMM . . . . . MT . . TTSFS  
tr|A0A2N1YEV4|A0A2N1YEV4\_9GAMM . . . . . MT . . TTNSFS  
tr|A0A3P3QCM3|A0A3P3QCM3\_9GAMM . . . . . MSQPTLD . . TKSTFS  
tr|F7NT72|F7NT72\_9GAMM . . . . . MSQPTLD . . TKSTFS  
tr|A0A3S2TW63|A0A3S2TW63\_9GAMM . . . . . MTEQTVIEQGTGTEQIA . . SAKTFS  
tr|A0A3D5BGW7|A0A3D5BGW7\_9GAMM . . . . . MTEQTVIEQGTGTEQIA . . SAKTFS  
tr|A0A5C7FI17|A0A5C7FI17\_9GAMM . . . . . MSQ . . QDKTFS  
tr|A0A0U4W982|A0A0U4W982\_9GAMM . . . . . MSQ . . QDKTFS  
tr|A0A2I0FCM2|A0A2I0FCM2\_9GAMM . . . . . MSQ . . QDKTFS  
tr|A0A2G2IVL1|A0A2G2IVL1\_9GAMM . . . . . MSQ . . QDKTFS  
tr|A6FI21|A6FI21\_9GAMM . . . . . MSQ . . QDKTFS  
tr|A0A4U1BNN2|A0A4U1BNN2\_9GAMM . . . . . MSQ . . QDKTFS  
tr|E1SQ60|E1SQ60\_FERBD . . . . . MKTDSFL . . MSDKTFS  
tr|A0A4Y6IZ09|A0A4Y6IZ09\_9GAMM . . . . . MEKSF T . . MEKSF T  
tr|A0A0C3QSZ7|A0A0C3QSZ7\_9GAMM . . . . . MEKSF T . . MEKSF T  
tr|A0A6L7HXW0|A0A6L7HXW0\_9GAMM . . . . . MEKSF T . . MEKSF T  
sp|A3QFP3|FADJ\_SHELP . . . . . MDKSF T . . MDKSF T  
tr|A0A1E5IXH7|A0A1E5IXH7\_SHECO . . . . . MEKTFE . . MEKTFE  
tr|A0A411PKQ0|A0A411PKQ0\_9GAMM . . . . . MEKTFN . . MEKTFN  
tr|A0A6G9QKM3|A0A6G9QKM3\_9GAMM . . . . . MEKTFN . . MEKTFN  
tr|A0A6P1UL63|A0A6P1UL63\_9GAMM . . . . . MEKTFN . . MEKTFN  
tr|A0A2N1ERI9|A0A2N1ERI9\_9GAMM . . . . . MEKTFN . . MEKTFN  
tr|A0A7W4FU55|A0A7W4FU55\_9GAMM . . . . . MEKTFN . . MEKTFN  
sp|Q8ECP7|FADJ\_SHEON . . . . . MGKTFN . . MGKTFN  
tr|A0A501XZY8|A0A501XZY8\_9GAMM . . . . . MEKTFN . . MEKTFN  
tr|A0A2W5DCZ0|A0A2W5DCZ0\_SHEOE . . . . . MEKTFN . . MEKTFN  
tr|A0A1E3V3C8|A0A1E3V3C8\_9GAMM . . . . . MEKTFN . . MEKTFN  
tr|A0A1Z4AI20|A0A1Z4AI20\_9GAMM . . . . . MEKTFN . . MEKTFN  
tr|A0A7X9LJL9|A0A7X9LJL9\_9GAMM . . . . . MEKTFN . . MEKTFN  
tr|A0A073KMY5|A0A073KMY5\_9GAMM . . . . . MA . . MEKTFN  
sp|A0KV76|FADJ\_SHESA . . . . . MEKTFN . . MEKTFN  
tr|A0A220UTH7|A0A220UTH7\_9GAMM . . . . . MEKTFN . . MEKTFN  
tr|A0A5B8R6W1|A0A5B8R6W1\_9GAMM . . . . . MEKTFN . . MEKTFN  
tr|V1DAI4|V1DAI4\_9GAMM . . . . . MA . . MEKTFN  
tr|A0A448CPQ4|A0A448CPQ4\_SHEPU . . . . . MEKTFY . . MEKTFY  
tr|A0A252ERQ3|A0A252ERQ3\_SHEPU . . . . . MEKTFN . . MEKTFN  
sp|Q0HKD1|FADJ\_SHESM . . . . . MEKTFN . . MEKTFN  
sp|Q0HWN3|FADJ\_SHESR . . . . . MEKTFN . . MEKTFN  
tr|F7RQE3|F7RQE3\_9GAMM . . . . . MEKTFN . . MEKTFN  
tr|B8EE98|B8EE98\_SHEB2 . . . . . MEKTFN . . MEKTFN  
sp|A6WQ25|FADJ\_SHEB8 . . . . . MEKTFN . . MEKTFN  
tr|A0A448EK41|A0A448EK41\_9GAMM . . . . . MEKTFN . . MEKTFN  
tr|A0A553JHX1|A0A553JHX1\_SHEHA . . . . . MDKTFN . . MDKTFN  
tr|B8CPY6|B8CPY6\_SHEFW . . . . . MEKTFN . . MEKTFN  
tr|A0A431WFC4|A0A431WFC4\_9GAMM . . . . . MEKTFN . . MEKTFN  
tr|A8FTR7|A8FTR7\_SHESH . . . . . MEKTFN . . MEKTFN  
tr|A0A431WNL0|A0A431WNL0\_9GAMM . . . . . MEKTFN . . MEKTFN  
tr|A0A550AEC5|A0A550AEC5\_9GAMM . . . . . MEKTFN . . MEKTFN  
tr|A0A7L4WW90|A0A7L4WW90\_9GAMM . . . . . MEKTFN . . MEKTFN  
tr|A9DDU3|A9DDU3\_9GAMM . . . . . MEKTFN . . MEKTFN  
tr|A0A330M2B9|A0A330M2B9\_9GAMM . . . . . MEKTFN . . MEKTFN  
tr|A0A5N8UFC7|A0A5N8UFC7\_9GAMM . . . . . MEKTFN . . MEKTFN  
tr|A0A1S6HN57|A0A1S6HN57\_9GAMM . . . . . MEKTFN . . MEKTFN  
tr|D4ZMH7|D4ZMH7\_SHEVD . . . . . MEKTFN . . MEKTFN  
tr|A0A3L8Q213|A0A3L8Q213\_9GAMM . . . . . MERTFN . . MERTFN  
tr|A0A3A6U4N9|A0A3A6U4N9\_9GAMM . . . . . MEKTFN . . MEKTFN  
tr|A0A4Q5MA37|A0A4Q5MA37\_9GAMM . . . . . MEKTFN . . MEKTFN  
tr|A0A1L6LSX5|A0A1L6LSX5\_9DEL T . . . . . MNNGKAESAARQALS  
tr|A0A2W4L9B9|A0A2W4L9B9\_9PRO T . . . . . MEVAVKEPEFRLLR  
tr|A0A2W4M4E6|A0A2W4M4E6\_9PRO T . . . . . MND R . . STAF R  
tr|A0A6I2GRX9|A0A6I2GRX9\_9DEL T . . . . . MAAPADF Q  
tr|A0A0H4WMK2|A0A0H4WMK2\_9DEL T . . . . . MATKVEELE . . AKQGF S  
tr|F8CJ36|F8CJ36\_MYXFH . . . . . MATKAELE . . VKQGF S  
tr|A0A250KOF1|A0A250KOF1\_9DEL T . . . . . MATKAELE . . VKQGF S  
tr|A0A7Y6WFZ2|A0A7Y6WFZ2\_9DEL T . . . . . MATKAELE . . VKQGF S  
tr|A0A7Y7C660|A0A7Y7C660\_9DEL T . . . . . MATKAELE . . VKQGF S  
tr|A0A7Y4JFH2|A0A7Y4JFH2\_MYXXA . . . . . MATKAELE . . VKQGF S  
tr|A0A4Y6CZQ9|A0A4Y6CZQ9\_MYXXA . . . . . MATKAELE . . VKQGF S

|                                |       |                      |   |
|--------------------------------|-------|----------------------|---|
| tr A0A7Y4IKV5 A0A7Y4IKV5_MYXXA | ..... | ..MATKAEEL..VKQGF    | S |
| tr A0A511HHB0 A0A511HHB0_9DELT | ..... | ..MATKAEEL..VKQGF    | S |
| tr A0A4Y6CKY7 A0A4Y6CKY7_MYXXA | ..... | ..MATKAEEL..VKQGF    | S |
| tr Q1D1F2 Q1D1F2_MYXXD         | ..... | ..MATKAEEL..VKQGF    | S |
| tr A0A7Y4MA14 A0A7Y4MA14_MYXXA | ..... | ..MATKAEEL..VKQGF    | S |
| tr A0A7T8Y4N9 A0A7T8Y4N9_MYXXA | ..... | ..MATKAEEL..VKQGF    | A |
| tr L7UE67 L7UE67_MYXSD         | ..... | ..MAIKLEEL..AKQGF    | S |
| tr A0A511T9X1 A0A511T9X1_MYXFU | ..... | ..MAIQLEELQ..AKQGF   | S |
| tr A0A7Y7C9C4 A0A7Y7C9C4_9DELT | ..... | ..MAIKLEEL..AKQGF    | S |
| tr A0A540X7W8 A0A540X7W8_9DELT | ..... | ..MAIKLEEL..AKQGF    | S |
| tr A0A3A5FK19 A0A3A5FK19_9DELT | ..... | ..MAIKLEEL..AKQGF    | R |
| tr A0A3A8JQL9 A0A3A8JQL9_9DELT | ..... | ..MATKQEAV..AKQGL    | S |
| tr A0A7Y4NFA4 A0A7Y4NFA4_9DELT | ..... | ..MATKQEAV..AKQGL    | S |
| tr A0A3A8HDQ7 A0A3A8HDQ7_9DELT | ..... | ..MATKQEAV..AKQGL    | S |
| tr A0A3A8GR90 A0A3A8GR90_9DELT | ..... | ..MATKQEAV..AKQGL    | S |
| tr A0A3A8SBD7 A0A3A8SBD7_9DELT | ..... | ..MATKQEAV..AKQGL    | S |
| tr A0A3A8T0I8 A0A3A8T0I8_9DELT | ..... | ..MATKQEAV..AKQGL    | S |
| tr A0A7X5BU07 A0A7X5BU07_9DELT | ..... | ..MATKQEAV..AKQGL    | S |
| tr A0A7Y1RVL2 A0A7Y1RVL2_9DELT | ..... | ..MATKQETV..AKQGL    | S |
| tr A0A3A8THN2 A0A3A8THN2_9DELT | ..... | ..MATKQEAV..AKQGL    | S |
| tr A0A7Y1RX76 A0A7Y1RX76_9DELT | ..... | ..MATKQEAV..AKQGL    | S |
| tr A0A3A8RA58 A0A3A8RA58_9DELT | ..... | ..MATKQEAV..AKQGL    | S |
| tr A0A410RPB6 A0A410RPB6_CORCK | ..... | ..MATKQEAV..AKQGL    | S |
| tr A0A7Y4J474 A0A7Y4J474_CORCK | ..... | ..MATKQEAV..AKQGL    | S |
| tr A0A3A8I9Z6 A0A3A8I9Z6_9DELT | ..... | ..MATKQEAV..AKQGL    | S |
| tr H8MKE9 H8MKE9_CORCM         | ..... | ..MATKQEAV..AKQGL    | S |
| tr A0A3A8H102 A0A3A8H102_9DELT | ..... | ..MATKQEAV..AKQGL    | S |
| tr A0A554FW33 A0A554FW33_9DELT | ..... | ..MATKQEAV..AKQGL    | S |
| tr A0A3A8NPC0 A0A3A8NPC0_9DELT | ..... | ..MATKHEEV..AKQGL    | S |
| tr A0A3A8JUV3 A0A3A8JUV3_9DELT | ..... | ..MATKHEEV..AKQGL    | S |
| tr A0A3A8NEX6 A0A3A8NEX6_9DELT | ..... | ..MATKHEEV..AKQGL    | S |
| tr A0A3A8JEU8 A0A3A8JEU8_9DELT | ..... | ..MATKHEEV..AKQGL    | S |
| tr A0A3A8LI76 A0A3A8LI76_9DELT | ..... | ..MATKHEEV..AKQGL    | S |
| tr A0A085WXN8 A0A085WXN8_9DELT | ..... | ..MAIKLEEL..AQQGF    | T |
| tr A0A2T4VOM5 A0A2T4VOM5_9DELT | ..... | ..MAAMIAQEL..AKQGF   | T |
| tr A0A0G2ZSW5 A0A0G2ZSW5_9DELT | ..... | ..MAAMIAQEL..AKQGF   | T |
| tr A0A3M2DKY0 A0A3M2DKY0_9DELT | ..... | .....MTS..TPRAL      | T |
| tr A0A661NQ58 A0A661NQ58_9DELT | ..... | ..MTTKNENSGT..KTESFR |   |
| tr A0A520YD99 A0A520YD99_9DELT | ..... | .....MANEGL          | S |
| tr A0A7Y3BRE4 A0A7Y3BRE4_9DELT | ..... | .....MANEGL          | S |
| tr A0A2D9TF90 A0A2D9TF90_9DELT | ..... | .....MSEEKTFR        |   |
| tr A0A2E0TP32 A0A2E0TP32_9DELT | ..... | .....MSDE..KKSAL     | S |
| tr A0A2E4Y3V1 A0A2E4Y3V1_9PROT | ..... | .....MSLP..NLKYFN    |   |
| tr A0A2E6VRH4 A0A2E6VRH4_9DELT | ..... | .....MKNINH          |   |
| tr A0A1F9FB59 A0A1F9FB59_9DELT | ..... | .....                |   |



tr|A0A2D0KWM9|A0A2D0KWM9\_9GAMM F SVRRDRVGVITIDVDPGEKVN...  
tr|A0A2D0LAI1|A0A2D0LAI1\_9GAMM F SVRRDRVGVITIDVDPGEKVN...  
tr|A0A2D0IXC8|A0A2D0IXC8\_XENBU F SVRRDKKIGVITIDVDPGEKVN...  
tr|W1JAM5|W1JAM5\_9GAMM F SVRRDKKIGVITIDVDPGEKVN...  
tr|A0A3D9UED3|A0A3D9UED3\_9GAMM F SVRRDKKIGVITIDVDPGEKVN...  
tr|A0A1I3JCA9|A0A1I3JCA9\_9GAMM F SVRRDKKIGVITIDVDPGEKVN...  
tr|A0A068QUL9|A0A068QUL9\_9GAMM F SVRRDKKIGVITIDVDPGEKVN...  
tr|A0A0M0TCH6|A0A0M0TCH6\_9GAMM F SVRRDKKIGVITIDVDPGEKVN...  
tr|A0A1Q5U854|A0A1Q5U854\_9GAMM F SVRRDKKIGVITIDVDPGEKVN...  
tr|A0A2D0ISP1|A0A2D0ISP1\_9GAMM F SVRRDKKIGVITIDVDPGEKVN...  
tr|A0A1Q5TUI8|A0A1Q5TUI8\_9GAMM F SVRRDKKIGVITIDVDPGEKVN...  
tr|A0A2D0KJI7|A0A2D0KJI7\_9GAMM F SVRRDKKIGVITIDVDPGEKVN...  
tr|A0A1Y2SB97|A0A1Y2SB97\_9GAMM F SVRRDKKIGVITIDVDPGEKVN...  
tr|A0A1I5DWI7|A0A1I5DWI7\_9GAMM F SVRRDKKIGVITIDVDPGEKVN...  
tr|A0A1I7GWY6|A0A1I7GWY6\_9GAMM F SVRRDKKIGVITIDVDPGEKVN...  
tr|D3VKY8|D3VKY8\_XENNA F SVRRDKKIGVITIDVDPGEKVN...  
tr|A0A2G0Q6Q9|A0A2G0Q6Q9\_9GAMM F SVRRDKKIGVITIDVDPGEKVN...  
tr|A0A2D0JU24|A0A2D0JU24\_9GAMM F SVRRDKKIGVITIDVDPGEKVN...  
tr|A0A0J5FN38|A0A0J5FN38\_9GAMM F SVRRDKKIGVITIDVDPGEKVN...  
tr|A0A432XLD4|A0A432XLD4\_9GAMM F SVRRDKKIGVITIDVDPGEKVN...  
tr|A0A2D8HU84|A0A2D8HU84\_9GAMM F SVRRDKKIGVITIDVDPGEKVN...  
tr|A0A656X1Q2|A0A656X1Q2\_9GAMM F SVRRDKKIGVITIDVDPGEKVN...  
tr|A0A4Q1QH79|A0A4Q1QH79\_9GAMM F SVRRDKKIGVITIDVDPGEKVN...  
tr|A0A1G7LQE6|A0A1G7LQE6\_9GAMM F SVRRDKKIGVITIDVDPGEKVN...  
tr|A0A432YV77|A0A432YV77\_9GAMM F SVRRDKKIGVITIDVDPGEKVN...  
tr|A0A1J5N0P5|A0A1J5N0P5\_9GAMM F SVRRDKKIGVITIDVDPGEKVN...  
tr|A0A0D8D548|A0A0D8D548\_9GAMM F SVRRDKKIGVITIDVDPGEKVN...  
tr|A0A3E0TNM2|A0A3E0TNM2\_9GAMM F SVRRDKKIGVITIDVDPGEKVN...  
tr|A0A3E0UD67|A0A3E0UD67\_9GAMM F SVRRDKKIGVITIDVDPGEKVN...  
tr|A0A3E0U0P4|A0A3E0U0P4\_9GAMM F SVRRDKKIGVITIDVDPGEKVN...  
tr|A0A0M2V8B1|A0A0M2V8B1\_9GAMM F SVRRDKKIGVITIDVDPGEKVN...  
tr|A0A285ITY5|A0A285ITY5\_9GAMM F SVRRDKKIGVITIDVDPGEKVN...  
tr|A0A486XTB9|A0A486XTB9\_9GAMM F SVRRDKKIGVITIDVDPGEKVN...  
tr|I1E1G1|I1E1G1\_9GAMM F SVRRDKKIGVITIDVDPGEKVN...  
tr|A0A1H6KJ68|A0A1H6KJ68\_9GAMM F SVRRDKKIGVITIDVDPGEKVN...  
tr|A0A0X3Y764|A0A0X3Y764\_9GAMM F SVRRDKKIGVITIDVDPGEKVN...  
tr|A0A2N1YEV4|A0A2N1YEV4\_9GAMM F SVRRDKKIGVITIDVDPGEKVN...  
tr|A0A3P3QCM3|A0A3P3QCM3\_9GAMM F SVRRDKKIGVITIDVDPGEKVN...  
tr|F7NT72|F7NT72\_9GAMM F SVRRDKKIGVITIDVDPGEKVN...  
tr|A0A3S2TW63|A0A3S2TW63\_9GAMM F SVRRDKKIGVITIDVDPGEKVN...  
tr|A0A3D5BGW7|A0A3D5BGW7\_9GAMM F SVRRDKKIGVITIDVDPGEKVN...  
tr|A0A5C7TI17|A0A5C7TI17\_9GAMM F SVRRDKKIGVITIDVDPGEKVN...  
tr|A0A0U4W982|A0A0U4W982\_9GAMM F SVRRDKKIGVITIDVDPGEKVN...  
tr|A0A2I0FCM2|A0A2I0FCM2\_9GAMM F SVRRDKKIGVITIDVDPGEKVN...  
tr|A0A2G2IVL1|A0A2G2IVL1\_9GAMM F SVRRDKKIGVITIDVDPGEKVN...  
tr|A6FT21|A6FT21\_9GAMM F SVRRDKKIGVITIDVDPGEKVN...  
tr|A0A4U1BNR2|A0A4U1BNR2\_9GAMM F SVRRDKKIGVITIDVDPGEKVN...  
tr|E1SQ60|E1SQ60\_FERBD F SVRRDKKIGVITIDVDPGEKVN...  
tr|A0A4Y6I209|A0A4Y6I209\_9GAMM F SVRRDKKIGVITIDVDPGEKVN...  
tr|A0A0C3QSZ7|A0A0C3QSZ7\_9GAMM F SVRRDKKIGVITIDVDPGEKVN...  
tr|A0A6L7HXW0|A0A6L7HXW0\_9GAMM F SVRRDKKIGVITIDVDPGEKVN...  
sp|A3QFP3|FADJ\_SHELP F SVRRDKKIGVITIDVDPGEKVN...  
tr|A0A1E5IXH7|A0A1E5IXH7\_SHECO F SVRRDKKIGVITIDVDPGEKVN...  
tr|A0A411PKQ0|A0A411PKQ0\_9GAMM F SVRRDKKIGVITIDVDPGEKVN...  
tr|A0A6G9QKM3|A0A6G9QKM3\_9GAMM F SVRRDKKIGVITIDVDPGEKVN...  
tr|A0A6P1UL63|A0A6P1UL63\_9GAMM F SVRRDKKIGVITIDVDPGEKVN...  
tr|A0A2N1ERI9|A0A2N1ERI9\_9GAMM F SVRRDKKIGVITIDVDPGEKVN...  
tr|A0A7W4FU55|A0A7W4FU55\_9GAMM F SVRRDKKIGVITIDVDPGEKVN...  
sp|Q8ECP7|FADJ\_SHEON F SVRRDKKIGVITIDVDPGEKVN...  
tr|A0A501XZY8|A0A501XZY8\_9GAMM F SVRRDKKIGVITIDVDPGEKVN...  
tr|A0A2W5DCZ0|A0A2W5DCZ0\_SHEOE F SVRRDKKIGVITIDVDPGEKVN...  
tr|A0A1E3V3C8|A0A1E3V3C8\_9GAMM F SVRRDKKIGVITIDVDPGEKVN...  
tr|A0A1Z4AI20|A0A1Z4AI20\_9GAMM F SVRRDKKIGVITIDVDPGEKVN...  
tr|A0A7X9LJL9|A0A7X9LJL9\_9GAMM F SVRRDKKIGVITIDVDPGEKVN...  
tr|A0A073KMY5|A0A073KMY5\_9GAMM F SVRRDKKIGVITIDVDPGEKVN...  
sp|A0KV76|FADJ\_SHESA F SVRRDKKIGVITIDVDPGEKVN...  
tr|A0A220UTH7|A0A220UTH7\_9GAMM F SVRRDKKIGVITIDVDPGEKVN...  
tr|A0A5B8R6W1|A0A5B8R6W1\_9GAMM F SVRRDKKIGVITIDVDPGEKVN...  
tr|V1DAI4|V1DAI4\_9GAMM F SVRRDKKIGVITIDVDPGEKVN...  
tr|A0A448CPQ4|A0A448CPQ4\_SHEPU F SVRRDKKIGVITIDVDPGEKVN...  
tr|A0A252ERQ3|A0A252ERQ3\_SHEPU F SVRRDKKIGVITIDVDPGEKVN...  
sp|Q0HKD1|FADJ\_SHESM F SVRRDKKIGVITIDVDPGEKVN...  
sp|Q0HWN3|FADJ\_SHESR F SVRRDKKIGVITIDVDPGEKVN...  
tr|F7RQE3|F7RQE3\_9GAMM F SVRRDKKIGVITIDVDPGEKVN...  
tr|B8EE98|B8EE98\_SHEB2 F SVRRDKKIGVITIDVDPGEKVN...  
sp|A6WQ25|FADJ\_SHEB8 F SVRRDKKIGVITIDVDPGEKVN...  
tr|A0A448EK41|A0A448EK41\_9GAMM F SVRRDKKIGVITIDVDPGEKVN...  
tr|A0A553JHX1|A0A553JHX1\_SHEHA F SVRRDKKIGVITIDVDPGEKVN...  
tr|B8CPY6|B8CPY6\_SHEFW F SVRRDKKIGVITIDVDPGEKVN...  
tr|A0A431WFC4|A0A431WFC4\_9GAMM F SVRRDKKIGVITIDVDPGEKVN...  
tr|A8FTR7|A8FTR7\_SHESH F SVRRDKKIGVITIDVDPGEKVN...  
tr|A0A431WNL0|A0A431WNL0\_9GAMM F SVRRDKKIGVITIDVDPGEKVN...  
tr|A0A550AEC5|A0A550AEC5\_9GAMM F SVRRDKKIGVITIDVDPGEKVN...  
tr|A0A7L4W90|A0A7L4W90\_9GAMM F SVRRDKKIGVITIDVDPGEKVN...  
tr|A9DDU3|A9DDU3\_9GAMM F SVRRDKKIGVITIDVDPGEKVN...  
tr|A0A330M2B9|A0A330M2B9\_9GAMM F SVRRDKKIGVITIDVDPGEKVN...  
tr|A0A5N8UFC7|A0A5N8UFC7\_9GAMM F SVRRDKKIGVITIDVDPGEKVN...  
tr|A0A1S6HN57|A0A1S6HN57\_9GAMM F SVRRDKKIGVITIDVDPGEKVN...  
tr|D4ZMH7|D4ZMH7\_SHEVD F SVRRDKKIGVITIDVDPGEKVN...  
tr|A0A3L8Q213|A0A3L8Q213\_9GAMM F SVRRDKKIGVITIDVDPGEKVN...  
tr|A0A3A6U4N9|A0A3A6U4N9\_9GAMM F SVRRDKKIGVITIDVDPGEKVN...  
tr|A0A4Q5MA37|A0A4Q5MA37\_9GAMM F SVRRDKKIGVITIDVDPGEKVN...  
tr|A0A1L6LSX5|A0A1L6LSX5\_9DELTA F SVRRDKKIGVITIDVDPGEKVN...  
tr|A0A2W4L9B9|A0A2W4L9B9\_9PROT F SVRRDKKIGVITIDVDPGEKVN...  
tr|A0A2W4M4E6|A0A2W4M4E6\_9PROT F SVRRDKKIGVITIDVDPGEKVN...  
tr|A0A6I2GRX9|A0A6I2GRX9\_9DELTA F SVRRDKKIGVITIDVDPGEKVN...  
tr|A0A0H4WMK2|A0A0H4WMK2\_9DELTA F SVRRDKKIGVITIDVDPGEKVN...  
tr|F8CJ36|F8CJ36\_MYXFH F SVRRDKKIGVITIDVDPGEKVN...  
tr|A0A250K0F1|A0A250K0F1\_9DELTA F SVRRDKKIGVITIDVDPGEKVN...  
tr|A0A7Y6WFZ2|A0A7Y6WFZ2\_9DELTA F SVRRDKKIGVITIDVDPGEKVN...  
tr|A0A7Y7C660|A0A7Y7C660\_9DELTA F SVRRDKKIGVITIDVDPGEKVN...  
tr|A0A7Y4JFH2|A0A7Y4JFH2\_MYXXA F SVRRDKKIGVITIDVDPGEKVN...  
tr|A0A4Y6CZQ9|A0A4Y6CZQ9\_MYXXA F SVRRDKKIGVITIDVDPGEKVN...

tr|A0A7Y4IKV5|A0A7Y4IKV5\_MYXXA|YRV.EDGVAVITFDLPLDSPVNTLSPEETGEAFLRVMAAER.EPEVKAVVFTSGKKDSFVA  
tr|A0A511HHB0|A0A511HHB0\_9DELT|YRV.EDGVAVITFDLPLDSPVNTLSPEETGEAFLRVMAAER.EPEVKAVVFTSGKKDSFVA  
tr|A0A4Y6CKY7|A0A4Y6CKY7\_MYXXA|YRV.EDGVAVITFDLPLDSPVNTLSPEETGEAFLRVMAAER.EPEVKAVVFTSGKKDSFVA  
tr|Q1D1F2|Q1D1F2\_MYXXD|YQV.EGGVAVITFDLPLDSPVNTLSPEETGEAFLRVMMRAER.EPEVKAVVFTSGKKDSFVA  
tr|A0A7Y4MA14|A0A7Y4MA14\_MYXXA|YQV.EGGVAVITFDLPLDSPVNTLSPEETGEAFLRVMMRAER.EPEVKAVVFTSGKKDSFVA  
tr|A0A7T8Y4N9|A0A7T8Y4N9\_MYXXA|YQV.EGGVAVITFDLPLDSPVNTLSPEETGEAFLRVMMRAER.EPEVKAVVFTSGKKDSFVA  
tr|L7UB67|L7UB67\_MYXSD|LQV.EDGVAVITFDLPLDSPVNTLSPEETGEAFLRVMAAER.EPEVKAVVFTSGKKDSFVA  
tr|A0A511T9X1|A0A511T9X1\_MYXFU|LQV.EDGVAVITFDLPLDSPVNTLSPEETGEAFLRVMAAER.EPEVKAVVFTSGKKDSFVA  
tr|A0A7Y7C9C4|A0A7Y7C9C4\_9DELT|LSV.EDGIAVVSFDLPLDSPVNTLSPEETGEAFLRVMAAER.EPEVKAVVFTSGKKDSFVA  
tr|A0A540X7W8|A0A540X7W8\_9DELT|LTV.EDGVAVITFDLPLDSPVNTLSPEETGEAFLRVMAAER.EPEVKAVVFTSGKKDSFVA  
tr|A0A3A8SBD7|A0A3A8SBD7\_9DELT|YEV.EGGVAVITFDLPLDSPVNTLSPEETGEAFLRVMMRAER.EPEVKAVVFTSGKKDSFVA  
tr|A0A3A8JQL9|A0A3A8JQL9\_9DELT|YDV.TNGVAVITVDQPGAPVNTLSPEETGEAFLRVMAAER.EPEVKAVVFTSGKKDSFVA  
tr|A0A7Y4NFA4|A0A7Y4NFA4\_9DELT|YDV.TNGVAVITVDQPGAPVNTLSPEETGEAFLRVMAAER.EPEVKAVVFTSGKKDSFVA  
tr|A0A3A8HDQ7|A0A3A8HDQ7\_9DELT|YDV.TNGVAVITVDQPGAPVNTLSPEETGEAFLRVMAAER.EPEVKAVVFTSGKKDSFVA  
tr|A0A3A8GR90|A0A3A8GR90\_9DELT|YDV.TNGVAVITVDQPGAPVNTLSPEETGEAFLRVMAAER.EPEVKAVVFTSGKKDSFVA  
tr|A0A3A8SBD7|A0A3A8SBD7\_9DELT|YDV.TNGVAVITVDQPGAPVNTLSPEETGEAFLRVMAAER.EPEVKAVVFTSGKKDSFVA  
tr|A0A3A8T0I8|A0A3A8T0I8\_9DELT|YDV.TNGVAVITVDQPGAPVNTLSPEETGEAFLRVMAAER.EPEVKAVVFTSGKKDSFVA  
tr|A0A7X5BU07|A0A7X5BU07\_9DELT|YDV.TNGVAVITVDQPGAPVNTLSPEETGEAFLRVMAAER.EPEVKAVVFTSGKKDSFVA  
tr|A0A7Y1RVL2|A0A7Y1RVL2\_9DELT|YDV.TNGVAVITVDQPGAPVNTLSPEETGEAFLRVMAAER.EPEVKAVVFTSGKKDSFVA  
tr|A0A3A8THN2|A0A3A8THN2\_9DELT|YDV.TNGVAVITVDQPGAPVNTLSPEETGEAFLRVMAAER.EPEVKAVVFTSGKKDSFVA  
tr|A0A7Y1RX76|A0A7Y1RX76\_9DELT|YDV.TNGVAVITVDQPGAPVNTLSPEETGEAFLRVMAAER.EPEVKAVVFTSGKKDSFVA  
tr|A0A3A8RA58|A0A3A8RA58\_9DELT|YDV.TNGVAVITVDQPGAPVNTLSPEETGEAFLRVMAAER.EPEVKAVVFTSGKKDSFVA  
tr|A0A410RPB6|A0A410RPB6\_CORCK|YDV.TNGVAVITVDQPGAPVNTLSPEETGEAFLRVMAAER.EPEVKAVVFTSGKKDSFVA  
tr|A0A7Y4J474|A0A7Y4J474\_CORCK|YDV.TNSVAVITVDQPGAPVNTLSPEETGEAFLRVMAAER.EPEVKAVVFTSGKKDSFVA  
tr|A0A3A8I9Z6|A0A3A8I9Z6\_9DELT|YDV.TNGVAVITVDQPGAPVNTLSPEETGEAFLRVMAAER.EPEVKAVVFTSGKKDSFVA  
tr|H8MKE9|H8MKE9\_CORCM|YDV.TNGVAVITVDQPGAPVNTLSPEETGEAFLRVMAAER.EPEVKAVVFTSGKKDSFVA  
tr|A0A3A8H102|A0A3A8H102\_9DELT|YDV.TNGVAVITVDQPGAPVNTLSPEETGEAFLRVMAAER.EPEVKAVVFTSGKKDSFVA  
tr|A0A554FW33|A0A554FW33\_9DELT|YGV.TDGIAVITVDLPGAPVNTLSPEETGEAFLRVMAAER.EPEVKAVVFTSGKKDSFVA  
tr|A0A3A8NPC0|A0A3A8NPC0\_9DELT|YDV.TDGIAVITVDLPGAPVNTLSPEETGEAFLRVMAAER.EPEVKAVVFTSGKKDSFVA  
tr|A0A3A8JUV3|A0A3A8JUV3\_9DELT|YDV.TDGIAVITVDLPGAPVNTLSPEETGEAFLRVMAAER.EPEVKAVVFTSGKKDSFVA  
tr|A0A3A8NEX6|A0A3A8NEX6\_9DELT|YDV.TDGIAVITVDLPGAPVNTLSPEETGEAFLRVMAAER.EPEVKAVVFTSGKKDSFVA  
tr|A0A3A8JEU8|A0A3A8JEU8\_9DELT|YGV.TDGIAVITVDLPGAPVNTLSPEETGEAFLRVMAAER.EPEVKAVVFTSGKKDSFVA  
tr|A0A3A8LI76|A0A3A8LI76\_9DELT|YDV.TDGIAVITVDLPGAPVNTLSPEETGEAFLRVMAAER.EPEVKAVVFTSGKKDSFVA  
tr|A0A085WXN8|A0A085WXN8\_9DELT|YSV.EDGVAVITIDQGGAVNTLSPEETGEAFLRVMAAER.EPEVKAVVFTSGKKDSFVA  
tr|A0A2T4V0M5|A0A2T4V0M5\_9DELT|YHV.EDGVALVVIDQGGAVNTLSPEETGEAFLRVMAAER.EPEVKAVVFTSGKKDSFVA  
tr|A0A0G2ZSW5|A0A0G2ZSW5\_9DELT|YQV.EDGVALVVIDQGGAVNTLSPEETGEAFLRVMAAER.EPEVKAVVFTSGKKDSFVA  
tr|A0A3M2DKY0|A0A3M2DKY0\_9DELT|LDKRDGIAVITFDVPGDSVNTLSPEETGEAFLRVMAAER.EPEVKAVVFTSGKKDSFVA  
tr|A0A661NQ58|A0A661NQ58\_9DELT|VERRDDGVAIVRMDIPGAMNTLKSDFIETTFTEAFSSIEN.DPDIKAVVFTSGKKDSFVA  
tr|A0A520YD99|A0A520YD99\_9DELT|IEKRSDDGVAIVRMDIPGAMNTLKSDFIETTFTEAFSSIEN.DPDIKAVVFTSGKKDSFVA  
tr|A0A7Y3BRE4|A0A7Y3BRE4\_9DELT|IEKRSDDGVAIVRMDIPGAMNTLKSDFIETTFTEAFSSIEN.DPDIKAVVFTSGKKDSFVA  
tr|A0A2D9TF90|A0A2D9TF90\_9DELT|VEHREGGVAIVLMDVPGASMTLRGDFNAEFAGAFDALET.DPTVKAVVFTSGKKDSFVA  
tr|A0A2E0TP32|A0A2E0TP32\_9DELT|IDERDDGVAIVLMDVPGASMTLRGDFNAEFAGAFDALET.DPTVKAVVFTSGKKDSFVA  
tr|A0A2E4Y3V1|A0A2E4Y3V1\_9PROT|LSV.KDNVLIIFADDDPEEKVNTLNKMTDEFHKNMDVIDN.DDNIIKAVVFTSGKKDSFVA  
tr|A0A2E6VRH4|A0A2E6VRH4\_9DELT|SEV.IENILVVTLDLQCEKVNKLTSTLSGEFEEAFKQAE..DNAVEAVVFTSGKKDSFVA  
tr|A0A1F9FB59|A0A1F9FB59\_9DELT|. . . . .MTIDVPGKQNTLSEKTKHGFKVCFERVA..DPAIEGAVLISGKPD.FIA

ECHA\_HUMAN

00000000000000000000

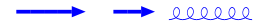

|                  | 110              | 120                  | 130                 | 140        | 150              |
|------------------|------------------|----------------------|---------------------|------------|------------------|
| ECHA_HUMAN       |                  |                      |                     |            |                  |
| tr A0A4R6XLA8    | A0A4R6XLA8_9GAMM | GADIN.MLAACKTQLQEVTL | SQEAQRIVEKLEKS..    | TKPIVAAIN  | GSCLEGELEVAISCO  |
| tr A0A6A01JT2    | A0A6A01JT2_9BACT | GADIK.DLMSIKDSKEVENL | SREGNKILSRILAQL..   | KKPVIAAIN  | GACLEGELEVAMACH  |
| tr A0A7V3QZU7    | A0A7V3QZU7_9BACT | GANDL.QVFLAMETAEAAAF | SRNGHALLDRIERS..    | AKPVVAIAG  | GAALEGELEVAMACH  |
| tr A0A7V4SYJ6    | A0A7V4SYJ6_9BACT | GADLK.FFLSRIDPVGGERF | SREGHALLDRAVAGS..   | SKPTVAIAG  | GLALEGELEVACH    |
| tr A0A2A8D2N6    | A0A2A8D2N6_9BACT | GADLK.DFLACRTPTEGAAL | SAEGHVLMDLVAKS..    | PKPVTVAIH  | GQVLEGELELVLCCT  |
| tr A0A2A8D2N6    | A0A2A8D2N6_9BACT | GADID.MLSAFEMPADVRL  | SRAHRLLARMQNLL..    | RMPPTVAIN  | GAAAMGELEMTLGTAT |
| tr A0A2N1TGP0    | A0A2N1TGP0_9SPIR | GADID.ELNRRKTTREVIDY | ISKAHVVLNKLLESLL..  | SIPVVCATG  | GSCLEGELEMTLGTAR |
| tr A0A1G3QGW4    | A0A1G3QGW4_9SPIR | GADID.EVLMKSDGEIRNY  | ISRANIDINRDDLL..    | PIPVVSCIHG | GNCLGELEVALASD   |
| tr A0A1G3QTY3    | A0A1G3QTY3_9SPIR | GADVD.EVLSMKTDLEIRDY | ISRANILARIDALL..    | PIPVVSCIHG | GNCLGELEVALASD   |
| tr A0A7X9L359    | A0A7X9L359_9DELT | GADVD.ELNAMKGDVEIAY  | ITKAHVLRKIEAL..     | PPVVCVGIHG | GNCLGELEVALVAN   |
| tr A0A522CJY0    | A0A522CJY0_9SPIR | GADID.EVKAASTKEAAEDY | LSRGHVLNRLAAL..     | RIPKVAIAG  | GAALEGELELAIAD   |
| tr A0A2N1RRJ3    | A0A2N1RRJ3_9SPIR | GADLF.ELKMKTSEEVLSY  | SMKGGHLLNRINEM..    | KIPFVACIN  | GTCLEGELEVALACH  |
| tr A0A2N2KFN7    | A0A2N2KFN7_9DELT | GAAID.ELQAMRTKEEVVAY | IALGHSLLNDLENM..    | KIPVVAIAG  | GNCLGELEVALACN   |
| tr A0A1V6AXX9    | A0A1V6AXX9_9DELT | GADID.ELKGMRTTEVIAY  | ISKGHAILNSLEKM..    | KIPVVCATG  | GNCLGELEVALVCN   |
| tr A0A2N2HZL0    | A0A2N2HZL0_9DELT | GADID.ELKGMRTSEVIAY  | ISKAHAILNGLESM..    | QIPVVAIAG  | GNCLGELEVALACN   |
| tr A0A5E8ARP3    | A0A5E8ARP3_9BACT | GADIE.KFLQEM.PGESKAT | AQAQHMLRDLSDS..     | KKPCVAAIH  | GACMGGELEISLACA  |
| tr A0A662A7B1    | A0A662A7B1_9BACT | .....GDEPKAALTGK     | LLLRLENS..          | EKPFVVAIH  | GACMGGELEISLACA  |
| tr D7CV16 D7CV16 | TRURR            | GADIK.AFRTEFSPEQVTL  | IHEGHALFNRLDAL..    | NKPVVAIAG  | GAAVGELELILACH   |
| tr A0A3C2AKX4    | A0A3C2AKX4_9FLAO | GADIE.AFANVKKEGDWQP  | IATKKGHEILDRIQNS..  | KKPIVAIAG  | GACMGGELEIALACS  |
| tr A0A3B8ZLN3    | A0A3B8ZLN3_9PLAN | GADIE.AFANVQKPGDWLP  | IGKQGHAILNRIESS..   | RKPIVAIAG  | GACMGGELEIALACS  |
| tr A0A345UGV8    | A0A345UGV8_9BACT | GADIK.MFDFTTPEFFGAF  | IKTGDLLDRIEKF..     | KKPVIAIAG  | GNCLGELEVVMACH   |
| tr A0A6C1P6A2    | A0A6C1P6A2_9BACT | GADIK.LFQSLDTPAEMKFN | REGNTLLDRIEAF..     | PKPVIAMHG  | GTMMGELEVVALACH  |
| tr A0A3MLX9W8    | A0A3MLX9W8_9BACT | GADLD.VFLKMNPEPQAK   | QLSRRGHAVLNRLAFAF.. | PRPVVAIAG  | GAALEGELEVVALACH |
| tr A0A354C796    | A0A354C796_9DELT | GADLD.KFKDMTSPAEAL   | SRKGHTLLNRMANF..    | PKPIVAALHG | GATLGELEVVALACH  |
| tr A0A3M1NUM8    | A0A3M1NUM8_9BACT | GADIE.RLLALKEPFGVEAL | SRSQGVLDRVAAP..     | KKPIVAIAG  | GAALGELEVVALACH  |
| tr A0A3M2KRC8    | A0A3M2KRC8_9BACT | GADLDKLELRHTPGAVED   | LSRQGHQLNRLASS..    | RKPIVAIAG  | GAALGELEVVALACH  |
| tr A0A5S9IHR0    | A0A5S9IHR0_9BACT | GADLD.VLQTPDKAEDAQR  | ASDQDGNLLTRVSKF..   | PKPVAIAG   | GTMMGELEVVALACH  |
| tr A0A6M1ST81    | A0A6M1ST81_9BACT | GADVE.MLKNNKQAPGEIE  | ELSRGNELLLRLENY..   | NKPVVAIAG  | GACIGGNEVAMACH   |
| tr A0A521AAE5    | A0A521AAE5_9BACT | GADVE.MLKNNKAPKEVED  | LSRRGNLLELEHF..     | DKPVVAIAG  | GSCMGGELEVAMACH  |
| tr A0A1M4ZMD6    | A0A1M4ZMD6_9BACT | GADVA.MLKNNKAPKEIED  | LSRRGNLLELEHF..     | EKPIVAIAG  | SCMGGELEVAMACH   |
| tr A0A2A2GCS2    | A0A2A2GCS2_9BACT | GADVE.MLKNNKAPKEIED  | LSRRGNLLELEHF..     | PKPVAIAG   | GSCLEGELEVAMACH  |
| tr A0A5D3YIH7    | A0A5D3YIH7_9BACT | GADVE.MLKNNKSAPEGIE  | ELSRGNELLLKLEKH..   | PIPVVAIAG  | SCIGGMEVAMACH    |
| tr A0A6M1T9G0    | A0A6M1T9G0_9BACT | GADVE.MLKNNKSAPEGIE  | ELSRGNELLLKLENY..   | PKPVAIAG   | SCIGGMEVAMACH    |
| tr A0A6A8Q1Y8    | A0A6A8Q1Y8_9BACT | GADID.MFQERDTEVEIE   | QLSKDGHQLNRIADF..   | PKPIVAVHG  | SCMGGELELLACH    |
| tr A0A521BVJ3    | A0A521BVJ3_9BACT | GADID.MFQERDTAEIEE   | QLSKTGHQLNRIADF..   | EKPIVAVHG  | SCMGGELELSLACH   |
| tr A0A359E0Y8    | A0A359E0Y8_9BACT | GADID.MFQARDTAEIEE   | QLSKDGHQLNRIADF..   | KKPIVAVHG  | SCMGGELELSLACH   |
| tr A0A2D8CIM6    | A0A2D8CIM6_9BACT | GADID.MFQARDTAEIEE   | QLSKDGHQLNRIADF..   | KKPIVAVHG  | SCMGGELELSLACH   |
| tr A0A2D9FWF5    | A0A2D9FWF5_9BACT | GADID.MFQERDTEVEIE   | QLSKKGHQLNRIADF..   | KKPIVAVHG  | SCMGGELELSLACH   |
| tr A0A1B6YB70    | A0A1B6YB70_9BACT | GADIE.MFKARETAEIEE   | QLSLDGHQLNRRVSS..   | SKPIVVAIH  | GSCMGGELELSLACH  |
| tr A0A2D4ZTC0    | A0A2D4ZTC0_9BACT | GADIE.MFKSRETAEIEE   | QLSLDGHQLNRRVSS..   | SKPIVVAIH  | GSCMGGELELSLACH  |
| tr A0A3D4UVW7    | A0A3D4UVW7_9BACT | GADIE.MFKSRETAEIEE   | QLSLDGHQLNRRVSS..   | SKPIVVAIH  | GSCMGGELELSLACH  |
| tr A0A3F3I3M2    | A0A3F3I3M2_9BACT | GADIE.MFKSRETAEIEE   | QLSLDGHQLNRRVSS..   | SKPIVVAIH  | GSCMGGELELSLACH  |
| tr A0A3D1G7L9    | A0A3D1G7L9_9BACT | GADID.MFKARDTAEIEE   | QLSLNGHQLNRIEAS..   | AKPVVAIAG  | GSCMGGELELSLACH  |
| tr A0A3M8G1Y8    | A0A3M8G1Y8_9BACT | GADIE.MFKVDRTEAEEM   | QLSLDGNAILNKITAS..  | KKPFVVAIH  | GSCMGGELELSLACH  |
| tr A0A5Q4F391    | A0A5Q4F391_9BACT | GADIG.MFKARETAHELE   | LSRVGHQLNRRVEHF..   | AKPVVAIAG  | GSCMGGELELALACH  |
| tr A0A6I7NPV0    | A0A6I7NPV0_9BACT | GADIG.MFKSRETAEIEE   | GLSRGTGHNILRIERF..  | TKPVVAIAG  | GSCMGGELELALACH  |
| tr A0A651G1J2    | A0A651G1J2_9BACT | GADIE.MFKTRDTAEELAL  | SWTGHEILLRIEHS..    | TKPIVVAIAG | GSCMGGELELALACH  |
| tr A0A371QRK5    | A0A371QRK5_9BACT | GADIE.MFKTRTESEEL    | LSWGTGHEILLRVEQC..  | KKPIVAGIH  | GSCMGGELELALACH  |
| tr A0A2N0VGJ5    | A0A2N0VGJ5_9BACT | GADIE.MFKTRTESEEL    | LSWGTGHEILLRVEICL.. | KKPFVAGIH  | GSCMGGELELALASH  |
| tr A0A316TYJ0    | A0A316TYJ0_9BACT | GADIE.MFKTRDTAEEMAK  | LSWGTGHEILLRVEKC..  | KKPIVAGIH  | GSCMGGELELALACH  |
| tr A0A651GLZ8    | A0A651GLZ8_9BACT | GADIE.MFKTRTEADLE    | LSWGTGHEILLRVEQF..  | KKPIVAGIH  | GSCMGGELELALACH  |
| tr A0A7Y5V3S5    | A0A7Y5V3S5_9BACT | GADIE.EFLDWKTAQAESA  | SRGHALLDRLERL..     | RTPVVAIAG  | GACLEGELEASLACP  |
| tr A0A7W1SHC0    | A0A7W1SHC0_9BACT | GADIE.QLLGGARTAEAE   | ERMSRGGQAFDRLEQS..  | KLPPVVAIAG | GACLEGELEALACAC  |
| tr A0A7Y5PBT7    | A0A7Y5PBT7_9BACT | GADID.EFLTLLQTAGEAE  | ALSRSGQALLARLES..   | DIPVVAIAG  | GACLEGELETALACR  |
| tr A0A7Y5TXL8    | A0A7Y5TXL8_9BACT | GADID.EFLTLLQTAGEAE  | ALSRSGQALLARLES..   | DIPVVAIAG  | GACLEGELETALACR  |
| tr A0A423PQ96    | A0A423PQ96_9GAMM | GADID.MLDAQSAADEAL   | SKQGAGFRRLSKL..     | HVPVVAIAG  | GACLEGELETALACD  |
| tr U2G066 U2G066 | 9GAMM            | GADIG.LFEQVKSAGEVEAL | SLRGQAGFRRLSKL..    | HVPVVAIAG  | GSCLEGELEMALACD  |
| tr A0A2E0J1F4    | A0A2E0J1F4_9GAMM | GADIG.LFNDVKSANEVEAL | SLAAQAGFRRLSKL..    | HVPVVAIAG  | GSCLEGELEMALACD  |
| tr A0A2D4SCM8    | A0A2D4SCM8_9GAMM | GADIK.LFENVSTAKEIED  | LSRLQHAALQSMEDL..   | PVPVVAIAG  | GACLEGELETALACD  |
| tr LOWJH1 LOWJH1 | 9GAMM            | GADIN.LFEKAEANQAVSD  | LSLTCQTFQKLETL..    | GIPVVAIAG  | GACLEGELETALACS  |
| tr A0A1H5XF61    | A0A1H5XF61_9GAMM | GADIK.LFENAKTAKEVSD  | LSLTCQTFQKLEDL..    | DIPVVAIAG  | GACLEGELETALACS  |
| tr A0A2E9TS48    | A0A2E9TS48_9GAMM | GADIK.LFENAKTAKEVSD  | LSLTCQTFQKLEDL..    | DIPVVAIAG  | GACLEGELETALACS  |
| tr A0A095UE19    | A0A095UE19_9GAMM | GADIK.LFESAKTAKEVSD  | LSLTCQTFQKLEDL..    | DIPVVAIAG  | GACLEGELETALACS  |
| tr A0A7G2S9A0    | A0A7G2S9A0_9GAMM | GADIK.LFESAKTAKEVSD  | LSLTCQTFQKLEDL..    | DIPVVAIAG  | GACLEGELETALACS  |
| tr B5JU27 B5JU27 | 9GAMM            | GADIN.LFDSTGSKQEVV   | LSLTKCHRGFKAIEDL..  | NIPVVAIAG  | GACLEGELELAMACH  |
| tr A0A1Y0IHP1    | A0A1Y0IHP1_9GAMM | GADIN.LFDHAQSADEVSD  | LSRLCQKTFORLEDL..   | QIPVVAIAG  | GACLEGELELAMACH  |
| tr A0A316FZ14    | A0A316FZ14_9GAMM | GADIS.MLSDINEASDAED  | LAQKQAFNRLEKL..     | NIPVVAIAG  | GSCLEGELELAMACH  |
| tr A0A498C231    | A0A498C231_9GAMM | GADVH.MLAACEATAEAR   | LARAGQALFDRLEAF..   | AKPVVAIAG  | TCLGELELALACH    |
| tr Q0A6T4 Q0A6T4 | ALKEH            | GADVH.MLAACEATAEAR   | LARAGQALFDRLEAF..   | PKPVVAIAG  | TCLGELELALACH    |
| tr A0A3E0WL10    | A0A3E0WL10_9GAMM | GADIN.MLVRCQTADEATE  | LARGQNFNRIERF..     | RAPVVAIAG  | GACLEGELELAMACH  |
| tr A0A3S1BU16    | A0A3S1BU16_9GAMM | GADIH.MLHACQSAEATAL  | SQAGRFDRLEQF..      | KAPVVAIAG  | GACLEGELELAMACH  |
| tr A0A7V8QFN9    | A0A7V8QFN9_9GAMM | GADIE.MLQCRGSAQEV    | LSRAGQAFDRLEQF..    | GIPVVAIAG  | GACLEGELELAMACH  |
| tr A0A1H8PFF9    | A0A1H8PFF9_9GAMM | GADIE.MLQCRGSAQEV    | LSRAGQAFDRLEQF..    | NIPVVAIAG  | MCLGELELALACH    |
| tr A0A6H0J0V7    | A0A6H0J0V7_9GAMM | GADID.MLRSCTSAAEV    | TELSRAGQAFDRLEQF..  | RVPVVAIAG  | DSCLEGELELALACH  |
| tr V5EZK6 V5EZK6 | 9VIBR            | GADVH.MLSDACKTATQ    | ATELATTGQKMFALGEP.. | PFPVVAIAG  | PCLEGELELALACD   |
| tr A0A611QBM2    | A0A611QBM2_9VIBR | GADVH.MLSDACKTATQ    | ATELATTGQKMFALGEP.. | PFPVVAIAG  | PCLEGELELALACD   |
| tr A0A511QRL5    | A0A511QRL5_9VIBR | GADVH.MLSDACKTATQ    | ATELATTGQKMFALGEP.. | PFPVVAIAG  | PCLEGELELALACD   |
| tr A0A7Y0JZP4    | A0A7Y0JZP4_9VIBR | GADVH.MLSDACKTAEQ    | ATELATTGQKMFALGEP.. | PFPVVAIAG  | PCLEGELELALACD   |
| tr A0A193KD24    | A0A193KD24_9VIBR | GADVH.MLSDACKTAEQ    | ATELATTGQKMFALGEP.. | PFPVVAIAG  | PCLEGELELALACD   |
| tr A0A1S1HM72    | A0A1S1HM72_PROST | GADIS.MIANCTSKEAE    | LSREGHILFDKLENY..   | PLPIIAIAG  | GACLEGELELALACH  |
| tr A0A7T8I613    | A0A7T8I613_9GAMM | GADIS.MIANCTSKEAE    | LSREGHILFDKLENY..   | PLPIIAIAG  | GACLEGELELALACH  |
| tr A0A140NIF0    | A0A140NIF0_PROSM | GADIS.MIANCTSKEAE    | LSREGHILFDKLENY..   | PLPIIAIAG  | GACLEGELELALACH  |
| tr A0A379GMB7    | A0A379GMB7_PROST | GADIS.MIANCTSKEAE    | LSREGHILFDKLENY..   | PLPIIAIAG  | GACLEGELELALACH  |
| tr A0A379H393    | A0A379H393_PROST | GADIS.MIANCTSKEAE    | LSREGHILFDKLENY..   | PLPIIAIAG  | GACLEGELELALACH  |
| tr B2Q0L5 B2Q0L5 | PROST            | GADIS.MIANCTSKEAE    | LSREGHILFDKLENY..   | PLPIIAIAG  | GACLEGELELALACH  |
| tr A0A6I3JUE9    | A0A6I3JUE9_9GAMM | GADIS.MIADCKTAEAE    | LSREGHILFDKLENY..   | PLPIIAIAG  | GACLEGELELALACH  |
| tr A0A7D4P594    | A0A7D4P594_YERMW | GADIT.MIAACRTAQDAR   | ILAQKQSLAQIAAF..    | PVPVVAIAG  | GACLEGELELALACH  |
| tr A0A7U7IVK6    | A0A7U7IVK6_YEREN | GADIT.MIAACRTAQDAR   | ILAQKQSLAQIAAF..    | PVPVVAIAG  | GACLEGELELALACH  |
| tr A0A447RIF5    | A0A447RIF5_YEREN | GADIT.MIAACRTAQDAR   | ILAQKQSLAQIAAF..    | PVPVVAIAG  | GACLEGELELALACH  |
| tr A0A7H4ZLV9    | A0A7H4ZLV9_YERP4 | GADIT.MIAACRTAQDAR   | ILAQKQSLAQIAAF..    | PVPVVAIAG  | GACLEGELELALACH  |
| tr A0A0H3NX46    | A0A0H3NX46_YERE1 | GADIT.MIAACRTAQDAR   | ILAQKQSLAQIAAF..    | PVPVVAIAG  | GACLEGELELALACH  |
| tr A0A7T9XUV7    | A0A7T9XUV7_YEREN | GADIT.MIAACRTAQDAR   | ILAQKQSLAQIAAF..    | PVPVVAIAG  | GACLEGELELALACH  |
| tr A0A7U7IYV8    | A0A7U7IYV8_YEREN | GADIT.MIAACRTAQDAR   | ILAQKQSLAQIAAF..    | PVPVVAIAG  | GACLEGELELALACH  |
| tr A0A0H5G7G2    | A0A0H5G7G2_YEREN | GADIT.MIAACRTAQDAR   | ILAQKQSLAQIAAF..    | PVPVVAIAG  | GACLEGELELALACH  |
| tr A0A2A7TDI2    | A0A2A7TDI2_YERKR | GADIS.MIAACRTAQDAR   | ILAQKQSLAQIAAF..    | PVPVVAIAG  | GACLEGELELALACH  |
| tr A0A0T9M261    | A0A0T9M261_YERKR | GADIS.MIAACRTAQDAR   | ILAQKQSLAQIAAF..    | PVPVVAIAG  | GACLEGELELALACH  |
| tr A0A0A0CMP1    | A0A0A0CMP1_PHOLM | GADIS.MIAGCKTKEDAR   | DLAEKGQKLSQIAN..    | PLPVVAIAG  | GACLEGELELALACH  |
| tr A0A329VG55    | A0A329VG55_9GAMM | GADIS.MIAGCKTKEDAR   | DLAEKGQKLSQIAN..    | PLPVVAIAG  | GACLEGELELALACH  |
| tr Q7N288 FADJ   | PHOLL            | GADIS.MIAGCKTKEDAR   | DLAEKGQKLSQIAN..    | PLPVVAIAG  | GACLEGELELALACH  |
| tr A0A6L9JMX5    | A0A6L9JMX5_PHOLM | GADIS.MIAGCKTKEDAR   | DLAEKGQKLSQIAN..    | PLPVVAIAG  | GACLEGELELALACH  |
| tr A0A7X5HQ29    | A0A7X5HQ29_PHOLM | GADIS.MIAGCKTKEDAR   | DLAEKGQKLSQIAN..    | PLPVVAIAG  | GACLEGELELALACH  |
| tr A0A1C0U051    | A0A1C0U051_9GAMM | GADIS.MIAGCKTKEDAR   | DLAEKGQKLSQIAN..    | PLPVVAIAG  | GACLEGELELALACH  |
| tr A0A7X5QF62    | A0A7X5QF62_9GAMM | GADIS.MIAGCKTKEDAR   | DLAEKGQKLSQIAN..    | PLPVVAIAG  | GACLEGELELALACH  |

tr|A0A2D0KWM9|A0A2D0KWM9\_9GAMM GADIT.MIAGCQTQEEATLAEKQQLFQDIASY..SLPIVAATHGACLGGLGFALACH  
tr|A0A2D0LAI1|A0A2D0LAI1\_9GAMM GADIT.MIAGCQTQEEATLAEKQQLFQDIASY..SLPIVAATHGACLGGLGFALACH  
tr|A0A2D0IXC8|A0A2D0IXC8\_XENBU GADIT.MIAGCQTQEEATLAEKQQLFQDIASY..SLPIVAATHGACLGGLGFALACH  
tr|W1JAM5|W1JAM5\_9GAMM GADIT.MIAGCQTQEEATLAEKQQLFQDIASY..SLPIVAATHGACLGGLGFALACH  
tr|A0A3D9UED3|A0A3D9UED3\_9GAMM GADIT.MIAGCQTQEEATLAEKQQLFQDIASY..SLPIVAATHGACLGGLGFALACH  
tr|A0A1I3JCA9|A0A1I3JCA9\_9GAMM GADIS.MIANCQTQEEATLAEKQQLFQDIASY..SLPIVAATHGACLGGLGFALACH  
tr|A0A068QUL9|A0A068QUL9\_9GAMM GADIS.MIAHCQSPEEATLAEKQQLFQDIASY..SLPIVAATHGACLGGLGFALACH  
tr|A0A0M0TCH6|A0A0M0TCH6\_9GAMM GADIS.MIAHCQSPEEATLAEKQQLFQDIASY..SLPIVAATHGACLGGLGFALACH  
tr|A0A1Q5U854|A0A1Q5U854\_9GAMM GADIS.MIANCQTQEEATLAEKQQLFQDIASY..SLPIVAATHGACLGGLGFALACH  
tr|A0A2D0ISP1|A0A2D0ISP1\_9GAMM GADIS.MIANCQTQEEATLAEKQQLFQDIASY..SLPIVAATHGACLGGLGFALACH  
tr|A0A1Q5TUI8|A0A1Q5TUI8\_9GAMM GADIS.MIANCQTQEEATLAEKQQLFQDIASY..SLPIVAATHGACLGGLGFALACH  
tr|A0A2D0KJ17|A0A2D0KJ17\_9GAMM GADIS.MIANCQTQEEATLAEKQQLFQDIASY..SLPIVAATHGACLGGLGFALACH  
tr|A0A1Y2SB97|A0A1Y2SB97\_9GAMM GADIS.MIAGCQTQEEATLAEKQQLFQDIASY..SLPIVAATHGACLGGLGFALACH  
tr|A0A1I5DWI7|A0A1I5DWI7\_9GAMM GADIS.MIAGCQTQEEATLAEKQQLFQDIASY..SLPIVAATHGACLGGLGFALACH  
tr|A0A1I7GWY6|A0A1I7GWY6\_9GAMM GADIS.MIAGCQTQEEATLAEKQQLFQDIASY..SLPIVAATHGACLGGLGFALACH  
tr|D3VKY8|D3VKY8\_XENNA GADIS.MIAGCQTQEEATLAEKQQLFQDIASY..SLPIVAATHGACLGGLGFALACH  
tr|A0A2G0Q6Q9|A0A2G0Q6Q9\_9GAMM GADIS.MIAGCQTQEEATLAEKQQLFQDIASY..SLPIVAATHGACLGGLGFALACH  
tr|A0A2D0JU24|A0A2D0JU24\_9GAMM GADIS.MIAGCQTQEEATLAEKQQLFQDIASY..SLPIVAATHGACLGGLGFALACH  
tr|A0A0J5FN38|A0A0J5FN38\_9GAMM GADIS.MIAGCQTQEEATLAEKQQLFQDIASY..SLPIVAATHGACLGGLGFALACH  
tr|A0A432XLD4|A0A432XLD4\_9GAMM GADIS.MIDACETAADTESLARKGQAMFDRIEQL..NVPVVAATHGACLGGLGFALACH  
tr|A0A2D8HU84|A0A2D8HU84\_9GAMM GADIN.MIDGCENAVDAESLARKGQAMFDRIEQL..NVPVVAATHGACLGGLGFALACH  
tr|A0A656X1Q2|A0A656X1Q2\_9GAMM GADIN.MIDGCENAVDAESLARKGQAMFDRIEQL..NVPVVAATHGACLGGLGFALACH  
tr|A0A4Q1QH79|A0A4Q1QH79\_9GAMM GADIN.MINDCETAADTESLARKGQAMFDRIEQL..DVPVVAATHGACLGGLGFALACH  
tr|A0A1G7LQE6|A0A1G7LQE6\_9GAMM GADIN.MINDCETAADTESLARKGQAMFDRIEQL..DVPVVAATHGACLGGLGFALACH  
tr|A0A432YV77|A0A432YV77\_9GAMM GADIN.MINDCETAADTESLARKGQAMFDRIEQL..DVPVVAATHGACLGGLGFALACH  
tr|A0A1J5N0P5|A0A1J5N0P5\_9GAMM GADIT.MLDSQSRRDVLATSTMGRMFDRINEM..KVPVVAATHGACLGGLGFALACH  
tr|A0A0D8D548|A0A0D8D548\_9GAMM GADIN.MLNACQTAEEATLAEKQQLFQDIASY..SLPIVAATHGACLGGLGFALACH  
tr|A0A3E0TNNM2|A0A3E0TNNM2\_9GAMM GADIN.MLASCSAAEVTLSRHGHMVFQDMEKF..PKPIIAATHGACLGGLGFALACH  
tr|A0A3E0UD67|A0A3E0UD67\_9GAMM GADIN.MLASCTTAAEATLAEKQQLFQDIASY..SLPIVAATHGACLGGLGFALACH  
tr|A0A3E0U0P4|A0A3E0U0P4\_9GAMM GADIN.MLASCTTAAEATLAEKQQLFQDIASY..SLPIVAATHGACLGGLGFALACH  
tr|A0A0M2V8B1|A0A0M2V8B1\_9GAMM GADIS.MLDSQSAAEQADTARMGQAMFDRIEQL..TVPLVAATHGACLGGLGFALACH  
tr|A0A285ITY5|A0A285ITY5\_9GAMM GADIS.MLDSCTAEQAEDTARMGQAMFDRIEQL..KIPVVAATHGACLGGLGFALACH  
tr|A0A486XTB9|A0A486XTB9\_9GAMM GADIS.MLDGCKTAAEAQAI GRMGQAMFDRIEQL..SIPVVAATHGACLGGLGFALACH  
tr|I1E1G1|I1E1G1\_9GAMM GADIS.MLDGCKTAAEAQAI GRMGQAMFDRIEQL..SIPVVAATHGACLGGLGFALACH  
tr|A0A1H6KJ68|A0A1H6KJ68\_9GAMM GADIS.MLDGCKTAAEAQAI GRMGQAMFDRIEQL..SIPVVAATHGACLGGLGFALACH  
tr|A0A0X3Y764|A0A0X3Y764\_9GAMM GADIS.MLDGCKTAAEAQAI GRMGQAMFDRIEQL..SIPVVAATHGACLGGLGFALACH  
tr|A0A2N1YEV4|A0A2N1YEV4\_9GAMM GADIS.MLDGCKTAAEAQAI GRMGQAMFDRIEQL..SIPVVAATHGACLGGLGFALACH  
tr|A0A3P3QCM3|A0A3P3QCM3\_9GAMM GADIS.MLDGCTTAAQAEID GRMGQAMFDRIEQL..SIPVVAATHGACLGGLGFALACH  
tr|F7NT72|F7NT72\_9GAMM GADIS.MLDGCTTAAQAEID GRMGQAMFDRIEQL..SIPVVAATHGACLGGLGFALACH  
tr|A0A3S2TW63|A0A3S2TW63\_9GAMM GADIS.MLDGCTTAAQAEID GRMGQAMFDRIEQL..SIPVVAATHGACLGGLGFALACH  
tr|A0A3D5BGW7|A0A3D5BGW7\_9GAMM GADIT.MLDGCKTAAEAQAI GRMGQAMFDRIEQL..SIPVVAATHGACLGGLGFALACH  
tr|A0A5C7T117|A0A5C7T117\_9GAMM GADIS.MLDKCKTAAEAATLAEKQQLFQDIASY..SLPIVAATHGACLGGLGFALACH  
tr|A0A0U4W982|A0A0U4W982\_9GAMM GADIS.MLDKCKTAAEAATLAEKQQLFQDIASY..SLPIVAATHGACLGGLGFALACH  
tr|A0A2I0FCM2|A0A2I0FCM2\_9GAMM GADVT.MIDACETAADTESLARKGQAMFDRIEQL..NIPVVAATHGACLGGLGFALACH  
tr|A0A2G2IVL1|A0A2G2IVL1\_9GAMM GADVT.MIDACETAADTESLARKGQAMFDRIEQL..NIPVVAATHGACLGGLGFALACH  
tr|A6FT21|A6FT21\_9GAMM GADVT.MIDACETAADTESLARKGQAMFDRIEQL..NIPVVAATHGACLGGLGFALACH  
tr|A0A4U1BNN2|A0A4U1BNN2\_9GAMM GADIN.MLASCTTAAEATLAEKQQLFQDIASY..SLPIVAATHGACLGGLGFALACH  
tr|E1SQ60|E1SQ60\_FERBD GADIA.MLAACTTDDAYQISRGAQQLFNLEAL..KVPVVAATHGACLGGLGFALACH  
tr|A0A4Y6IZ09|A0A4Y6IZ09\_9GAMM GADIS.MLDACSTAGDAKALSQQGHVFNLEAL..NIPVVAATHGACLGGLGFALACH  
tr|A0A0C3QSZ7|A0A0C3QSZ7\_9GAMM GADIS.MLDACATAEDARELSKQGHEVFLALESL..SIPVVAATHGACLGGLGFALACH  
tr|A0A6L7HXW0|A0A6L7HXW0\_9GAMM GADIS.MLDACATAEDARELSKQGHEVFLALESL..SIPVVAATHGACLGGLGFALACH  
sp|A3QFP3|FADJ\_SHELP GADIS.MLDACATAEDARELSKQGHEVFLALESL..SIPVVAATHGACLGGLGFALACH  
tr|A0A1E5IXH7|A0A1E5IXH7\_SHECO GADIS.MLDACSTAAEDARELSKQGHEVFLALESL..SIPVVAATHGACLGGLGFALACH  
tr|A0A411PKQ0|A0A411PKQ0\_9GAMM GADIT.MLDACSTAAEDARELSKQGHEVFLALESL..SIPVVAATHGACLGGLGFALACH  
tr|A0A6G9QKM3|A0A6G9QKM3\_9GAMM GADIS.MLAACTTAAEDARELSKQGHEVFLALESL..SIPVVAATHGACLGGLGFALACH  
tr|A0A6P1UL63|A0A6P1UL63\_9GAMM GADIT.MLAACTTAAEDARELSKQGHEVFLALESL..SIPVVAATHGACLGGLGFALACH  
tr|A0A2N1ERI9|A0A2N1ERI9\_9GAMM GADIT.MLAACTTAAEDARELSKQGHEVFLALESL..SIPVVAATHGACLGGLGFALACH  
tr|A0A7W4FU55|A0A7W4FU55\_9GAMM GADIT.MLAACTTAAEDARELSKQGHEVFLALESL..SIPVVAATHGACLGGLGFALACH  
sp|Q8ECP7|FADJ\_SHEON GADIS.MLDACSTAGDAKALSQQGHVFNLEAL..NIPVVAATHGACLGGLGFALACH  
tr|A0A501XZY8|A0A501XZY8\_9GAMM GADIS.MLDACSTAGDAKALSQQGHVFNLEAL..NIPVVAATHGACLGGLGFALACH  
tr|A0A2W5DCZ0|A0A2W5DCZ0\_SHEOE GADIS.MLDACSTAGDAKALSQQGHVFNLEAL..NIPVVAATHGACLGGLGFALACH  
tr|A0A1E3V3C8|A0A1E3V3C8\_9GAMM GADIS.MLDACSTAGDAKALSQQGHVFNLEAL..NIPVVAATHGACLGGLGFALACH  
tr|A0A1Z4AI20|A0A1Z4AI20\_9GAMM GADIS.MLDACSTAGDAKALSQQGHVFNLEAL..NIPVVAATHGACLGGLGFALACH  
tr|A0A7X9LJL9|A0A7X9LJL9\_9GAMM GADIS.MLDACSTAGDAKALSQQGHVFNLEAL..NIPVVAATHGACLGGLGFALACH  
tr|A0A073KMY5|A0A073KMY5\_9GAMM GADIS.MLDACSTAGDAKALSQQGHVFNLEAL..NIPVVAATHGACLGGLGFALACH  
sp|A0KV76|FADJ\_SHEHA GADIS.MLDACSTAGDAKALSQQGHVFNLEAL..NIPVVAATHGACLGGLGFALACH  
tr|A0A220UTH7|A0A220UTH7\_9GAMM GADIS.MLDACSTAGDAKALSQQGHVFNLEAL..NIPVVAATHGACLGGLGFALACH  
tr|A0A5B8R6W1|A0A5B8R6W1\_9GAMM GADIS.MLDACSTAGDAKALSQQGHVFNLEAL..NIPVVAATHGACLGGLGFALACH  
tr|V1DAI4|V1DAI4\_9GAMM GADIS.MLDACSTAGDAKALSQQGHVFNLEAL..NIPVVAATHGACLGGLGFALACH  
tr|A0A448CPQ4|A0A448CPQ4\_SHEPU GADIS.MLDACSTAGDAKALSQQGHVFNLEAL..NIPVVAATHGACLGGLGFALACH  
tr|A0A252ERQ3|A0A252ERQ3\_SHEPU GADIS.MLDACSTAGDAKALSQQGHVFNLEAL..NIPVVAATHGACLGGLGFALACH  
sp|Q0HKD1|FADJ\_SHEMS GADIS.MLDACSTAGDAKALSQQGHVFNLEAL..NIPVVAATHGACLGGLGFALACH  
sp|Q0HWN3|FADJ\_SHESR GADIS.MLDACSTAGDAKALSQQGHVFNLEAL..NIPVVAATHGACLGGLGFALACH  
tr|F7RQE3|F7RQE3\_9GAMM GADIS.MLDACSTAGDAKALSQQGHVFNLEAL..NIPVVAATHGACLGGLGFALACH  
tr|B8EE98|B8EE98\_SHEB2 GADIS.MLDACSTAGDAKALSQQGHVFNLEAL..NIPVVAATHGACLGGLGFALACH  
sp|A6WQ25|FADJ\_SHEB8 GADIS.MLDACSTAGDAKALSQQGHVFNLEAL..NIPVVAATHGACLGGLGFALACH  
tr|A0A448EK41|A0A448EK41\_9GAMM GADIS.MLDACSTAGDAKALSQQGHVFNLEAL..NIPVVAATHGACLGGLGFALACH  
tr|A0A553JHX1|A0A553JHX1\_SHEHA GADIS.MLDACSTAGDAKALSQQGHVFNLEAL..NIPVVAATHGACLGGLGFALACH  
tr|B8CPY6|B8CPY6\_SHEFW GADIS.MLDACSTAGDAKALSQQGHVFNLEAL..NIPVVAATHGACLGGLGFALACH  
tr|A0A431WFC4|A0A431WFC4\_9GAMM GADIS.MLDACSTAGDAKALSQQGHVFNLEAL..NIPVVAATHGACLGGLGFALACH  
tr|A8FTR7|A8FTR7\_SHESH GADIS.MLDACSTAGDAKALSQQGHVFNLEAL..NIPVVAATHGACLGGLGFALACH  
tr|A0A431WNL0|A0A431WNL0\_9GAMM GADIS.MLDACSTAGDAKALSQQGHVFNLEAL..NIPVVAATHGACLGGLGFALACH  
tr|A0A550AEC5|A0A550AEC5\_9GAMM GADIS.MLDACSTAGDAKALSQQGHVFNLEAL..NIPVVAATHGACLGGLGFALACH  
tr|A0A7L4WW90|A0A7L4WW90\_9GAMM GADIS.MLDACSTAGDAKALSQQGHVFNLEAL..NIPVVAATHGACLGGLGFALACH  
tr|A9DDU3|A9DDU3\_9GAMM GADIS.MLDACSTAGDAKALSQQGHVFNLEAL..NIPVVAATHGACLGGLGFALACH  
tr|A0A330M2B9|A0A330M2B9\_9GAMM GADIS.MLDACSTAGDAKALSQQGHVFNLEAL..NIPVVAATHGACLGGLGFALACH  
tr|A0A5N8UFC7|A0A5N8UFC7\_9GAMM GADIS.MLDACSTAGDAKALSQQGHVFNLEAL..NIPVVAATHGACLGGLGFALACH  
tr|A0A1S6HN57|A0A1S6HN57\_9GAMM GADIS.MLDACSTAGDAKALSQQGHVFNLEAL..NIPVVAATHGACLGGLGFALACH  
tr|D4ZMH7|D4ZMH7\_SHEVD GADIS.MLDACSTAGDAKALSQQGHVFNLEAL..NIPVVAATHGACLGGLGFALACH  
tr|A0A3L8Q213|A0A3L8Q213\_9GAMM GADVK.MLDACKTADDARELSKQGHEVFLALESL..SIPVVAATHGACLGGLGFALACH  
tr|A0A3A6U4N9|A0A3A6U4N9\_9GAMM GADIS.MLDKCKTAAEAATLAEKQQLFQDIASY..SLPIVAATHGACLGGLGFALACH  
tr|A0A4Q5MA37|A0A4Q5MA37\_9GAMM GADIK.MLDACATAEDARELSKQGHEVFLALESL..SIPVVAATHGACLGGLGFALACH  
tr|A0A1L6LSX5|A0A1L6LSX5\_9DELTA GADIE.MLKALGTAAEATEMCRAGHRSTIEKLVSS..PKPVVAATHGACLGGLGFALACH  
tr|A0A2W4L9B9|A0A2W4L9B9\_9PROT GAKLE.MLQIRVQDAKAEALSRTAQDMFDEIAAS..KPPVVAATHGACLGGLGFALACH  
tr|A0A2W4M4E6|A0A2W4M4E6\_9PROT GADLK.LLRVTSREKAEELSRAGRALERLASS..KPPVVAATHGACLGGLGFALACH  
tr|A0A6I2GRX9|A0A6I2GRX9\_9DELTA GAKVD.YLQTLTAAEAATLAEKQQLFQDIASY..SLPIVAATHGACLGGLGFALACH  
tr|A0A0H4WMK2|A0A0H4WMK2\_9DELTA GAKID.FLQTIKTAEEATAISRNGQEGFDKLDFAF..PKPVVAATHGACLGGLGFALACH  
tr|F8CJ36|F8CJ36\_MYXFH GAKID.FLQTIKTAEEATAISRNGQEGFDKLDFAF..PKPVVAATHGACLGGLGFALACH  
tr|A0A250K0F1|A0A250K0F1\_9DELTA GAKID.FLQTIKTAEEATAISRNGQEGFDKLDFAF..PKPVVAATHGACLGGLGFALACH  
tr|A0A7Y6WFZ2|A0A7Y6WFZ2\_9DELTA GAKID.FLQTIKTAEEATAISRNGQEGFDKLDFAF..PKPVVAATHGACLGGLGFALACH  
tr|A0A7Y7C660|A0A7Y7C660\_9DELTA GAKID.FLQTIKTAEEATAISRNGQEGFDKLDFAF..PKPVVAATHGACLGGLGFALACH  
tr|A0A7Y4JFH2|A0A7Y4JFH2\_MYXXA GAKID.FLQTIKTAEEATAISRNGQEGFDKLDFAF..PKPVVAATHGACLGGLGFALACH  
tr|A0A4Y6CZQ9|A0A4Y6CZQ9\_MYXXA GAKID.FLQTIKTAEEATAISRNGQEGFDKLDFAF..PKPVVAATHGACLGGLGFALACH



|                                |                                                                |
|--------------------------------|----------------------------------------------------------------|
| tr A0A7Y4IKV5 A0A7Y4IKV5_MYXXA | GAKID.FLQTIKTAAEATAISRNGQEGFDKLADF..PKPVVAATHGACLGGLLEWALACD   |
| tr A0A511HHB0 A0A511HHB0_9DELT | GAKID.FLQTIKTAAEATAISRNGQEGFDKLADF..PKPVVAATHGACLGGLLEWALACD   |
| tr A0A4Y6CKY7 A0A4Y6CKY7_MYXXA | GAKID.FLQTIKTAAEATAISRNGQEGFDKLADF..PKPVVAATHGACLGGLLEWALACD   |
| tr Q1D1F2 Q1D1F2_MYXXD         | GAKID.FLQTIKTAAEATAISRNGQEGFDKLADF..PKPVVAATHGACLGGLLEWALACD   |
| tr A0A7Y4MA14 A0A7Y4MA14_MYXXA | GAKID.FLQTIKTAAEATAISRNGQEGFDKLADF..PKPVVAATHGACLGGLLEWALACD   |
| tr A0A7T8Y4N9 A0A7T8Y4N9_MYXXA | GAKID.FLQTIKTAAEATAISRNGQEGFDKLADF..PKPVVAATHGACLGGLLEWALACD   |
| tr L7UB67 L7UB67_MYXSD         | GAKID.LLQSLKTAAEATAISLQQQASFDMEAF..PKPILAAITHGACLGGLLEWALACH   |
| tr A0A511T9X1 A0A511T9X1_MYXFU | GAKID.YLQTLKTAAEATAMSQQGQAGFDRLEAF..PKPVVAATHGACLGGLLEWALACH   |
| tr A0A7Y7C9C4 A0A7Y7C9C4_9DELT | GAKID.YLQTLKTAAEATAMSQQGQAGFDRLEAF..PKPVVAATHGACLGGLLEWALACH   |
| tr A0A540X7W8 A0A540X7W8_9DELT | GAKID.YLQTLKTAAEDATAMSQQGQVGFDRLEAF..PKPVVAATHGACLGGLLEWALACH  |
| tr A0A3A8FK19 A0A3A8FK19_9DELT | GAKID.FLQTLRSAAEATAISRNGQEGFQLDAF..PKPVVAATHGACLGGLLEWALACH    |
| tr A0A3A8JQL9 A0A3A8JQL9_9DELT | GANID.FLQTIKTPADVEAISRGAAHQFDQLEAF..SKPVVAATHGACLGGLLEWVLACH   |
| tr A0A7Y4NFA4 A0A7Y4NFA4_9DELT | GANID.FLQTLKTPADVEAISRGAAHQFDQLEAF..SKPVVAATHGACLGGLLEWVLACH   |
| tr A0A3A8HDQ7 A0A3A8HDQ7_9DELT | GANID.FLQTIKTPADVEAISRGAAHQFDQLEAF..SKPVVAATHGACLGGLLEWVLACH   |
| tr A0A3A8GR90 A0A3A8GR90_9DELT | GANID.FLQTIKSPADVEAISRAAAHEFFDRLEAF..SKPVVAATHGACLGGLLEWVLACH  |
| tr A0A3A8SBD7 A0A3A8SBD7_9DELT | GANID.FLQTIKSPADVEAISRAAAHEFFDRLEAF..SKPVVAATHGACLGGLLEWVLACH  |
| tr A0A3A8T0I8 A0A3A8T0I8_9DELT | GANID.FLQTIKSPADVEAISRAAAHEFFDRLEAF..SKPVVAATHGACLGGLLEWVLACH  |
| tr A0A7X5BU07 A0A7X5BU07_9DELT | GANID.FLQTIKSPADVEAISRAAAHEFFDRLEAF..SKPVVAATHGACLGGLLEWVLACH  |
| tr A0A7Y1RVL2 A0A7Y1RVL2_9DELT | GANID.FLQTIKSPADVEAISRAAAHEFFDRLEAF..SKPVVAATHGACLGGLLEWVLACH  |
| tr A0A3A8THN2 A0A3A8THN2_9DELT | GANID.FLQTIKSPADVEAISRAAAHEFFDRLEAF..SKPVVAATHGACLGGLLEWVLACH  |
| tr A0A7Y1RX76 A0A7Y1RX76_9DELT | GANID.FLQTIKSPADVEAISRAAAHEFFDRLEAF..SKPVVAATHGACLGGLLEWVLACH  |
| tr A0A3A8RA58 A0A3A8RA58_9DELT | GANID.FLQTLKSPADVEAISRGAAHQFDQLEAF..SKPVVAATHGACLGGLLEWVLACH   |
| tr A0A410RPB6 A0A410RPB6_CORCK | GANID.FLQTLKSPADVEAISRAAAHEFFDRLEAF..SKPVVAATHGACLGGLLEWVLACH  |
| tr A0A7Y4J474 A0A7Y4J474_CORCK | GANID.FLRTLKTADVEAISRGAAHQFDQLEAF..SKPVVAATHGACLGGLLEWVLACH    |
| tr A0A3A8I9Z6 A0A3A8I9Z6_9DELT | GANID.FLQTIKTPADVEAISRGAAHQFDQLEAF..SKPVVAATHGACLGGLLEWVLACH   |
| tr H8MKE9 H8MKE9_CORCM         | GANID.FLQTLKTPADVEAISRGAAHQFDQLEAF..SKPVVAATHGACLGGLLEWVLACH   |
| tr A0A3A8H102 A0A3A8H102_9DELT | GANID.FLQTLKTPADVEAISRGAAHQFDQLEAF..SKPVVAATHGACLGGLLEWVLACH   |
| tr A0A554FW33 A0A554FW33_9DELT | GANID.FLQTLKSPDEVMASIAAYTEFDRLEAF..SKPVVAATHGACLGGLLEWALACH    |
| tr A0A3A8NPC0 A0A3A8NPC0_9DELT | GANID.FLQTIKSPDEVMASIAAYTEFDRLEAF..SKPVVAATHGACLGGLLEWALACH    |
| tr A0A3A8JUV3 A0A3A8JUV3_9DELT | GANID.FLQTIKSADEVVASISRGAAHQFDQLEAF..PKPVVAATHGACLGGLLEWALACH  |
| tr A0A3A8NEX6 A0A3A8NEX6_9DELT | GANID.FLQTIKSADEVVASISRTAHAQFDQLEAF..PKPVVAATHGACLGGLLEWALACH  |
| tr A0A3A8JEU8 A0A3A8JEU8_9DELT | GANID.FLQTIKSPDDVVAISRAAAHEFFDRLEAF..SKPVVAATHGACLGGLLEWALACH  |
| tr A0A3A8LI76 A0A3A8LI76_9DELT | GANID.FLQTIKSPDEVVASISRAAAHEFFDRLEAF..SKPVVAATHGACLGGLLEWALACH |
| tr A0A085WXN8 A0A085WXN8_9DELT | GAKID.FLQTIKTAAEATEISRKQEGFDRLDAF..PKPVVAATHGACLGGLLEWALACD    |
| tr A0A2T4VOM5 A0A2T4VOM5_9DELT | GAKID.FLQTIKSAAEATAVSRQGGQGFDRLEAF..PKPVVAATHGACLGGLLEWALACD   |
| tr A0A0G2ZSW5 A0A0G2ZSW5_9DELT | GAKID.FLQTLKSAAEATAVSRQGGQGFDRLEAF..SKPVVAATHGACLGGLLEWALACD   |
| tr A0A3M2DKY0 A0A3M2DKY0_9DELT | GANID.MLRRRAATPADAEALSRSGQRAMQRIEDL..RVPVVAATHGACLGGLLELAMACH  |
| tr A0A661NQ58 A0A661NQ58_9DELT | GADIS.MLEAAKTAADETEISQRGGALNRVEAL..GKPVVAATHGACLGGLLEVALACH    |
| tr A0A520YD99 A0A520YD99_9DELT | GADIT.MLEAVTSAAEGERVSRGKHVMNQIENC..PKPVVAATHGVALGGLLEVALACH    |
| tr A0A7Y3BRE4 A0A7Y3BRE4_9DELT | GADIT.MLEAVTSAAEGERVSRGKHVMNQIENC..PKPVVAATHGVALGGLLEVALACH    |
| tr A0A2D9TF90 A0A2D9TF90_9DELT | GADIG.MLDAIDTAAAGAAVSRAGQAMDRVAAF..PKPVVAATHGACLGGLLEVALACH    |
| tr A0A2E0TP32 A0A2E0TP32_9DELT | GANID.MLARAKSAAEASELSRQGGKAMDRIEAF..PKPVVAATHGACLGGLLEVALACH   |
| tr A0A2E4Y3V1 A0A2E4Y3V1_9PROT | GADIK.MIKEFKTKEDVVKTSREGHELFKRIEKH..KKPSVAATNGPCLGGLLEVALSCH   |
| tr A0A2E6VRH4 A0A2E6VRH4_9DELT | GADID.ELSNAAAEAIKTLSONGQAFDRLEAF..PKPIIAATHGACMGGLLELALACH     |
| tr A0A1F9FB59 A0A1F9FB59_9DELT | GADIS.MIQTRKSAAEVERLSRELQQQLFLLEQS..SKPIVAATHGACMGGLLEIALACH   |



tr|A0A2D0KWM9|A0A2D0KWM9\_9GAMM|ARICSLDDKTRRLGLPEVQI|GLLPGSGGTQRLPRLIGVSSALDMILTRQLKAKQ|AKRLGV  
tr|A0A2D0LAI1|A0A2D0LAI1\_9GAMM|ARICSLDDKTRRLGLPEVQI|GLLPGSGGTQRLPRLIGVSSALDMILTRQLKAKQ|AKRLGV  
tr|A0A2D0IXC8|A0A2D0IXC8\_XENBU|ARVCSLDDKTRRLGLPEVQI|GLLPGSGGTQRLPRLIGVSSALDMMLTRQLKANQ|AKRLGV  
tr|W1JAM5|W1JAM5\_9GAMM|ARVCSLDDKTRRLGLPEVQI|GLLPGSGGTQRLPRLIGVSSALDMMLTRQLKANQ|AKRLGV  
tr|A0A3D9UED3|A0A3D9UED3\_9GAMM|ARVCSLDDKTRRLGLPEVQI|GLLPGSGGTQRLPRLIGVSSALDMMLTRQLKANQ|AKRLGV  
tr|A0A1I3JCA9|A0A1I3JCA9\_9GAMM|ARVCSLDEKTRRLGLPEVQI|GLLPGSGGTQRLPRLIGVSSAALDIILTRQLKAKQ|AQRLGV  
tr|A0A068QUL9|A0A068QUL9\_9GAMM|ARICSLDEKTRRLGLPEVQI|GLLPGSGGTQRLPRLIGVSSAALDIILTRQLKAKQ|AQRLGV  
tr|A0A0M0TCH6|A0A0M0TCH6\_9GAMM|ARICSLDEKTRRLGLPEVQI|GLLPGSGGTQRLPRLIGVSSAALDIILTRQLKAKQ|AQRLGV  
tr|A0A1Q5U854|A0A1Q5U854\_9GAMM|ARICSLDEKTRRLGLPEVQI|GLLPGSGGTQRLPRLIGVSSAALDIILTRQLKAKQ|AQRLGV  
tr|A0A2D0ISP1|A0A2D0ISP1\_9GAMM|ARICSLDEKTRRLGLPEVQI|GLLPGSGGTQRLPRLIGVSSAALDIILTRQLKAKQ|AQRLGV  
tr|A0A1Q5TUI8|A0A1Q5TUI8\_9GAMM|ARICSLDEKTRRLGLPEVQI|GLLPGSGGTQRLPRLIGVSSAALDIILTRQLKAKQ|AQRLGV  
tr|A0A2D0KJ17|A0A2D0KJ17\_9GAMM|ARICSLDEKTRRLGLPEVQI|GLLPGSGGTQRLPRLIGVSSAALDIILTRQLKAKQ|AQRLGV  
tr|A0A1Y2SB97|A0A1Y2SB97\_9GAMM|VRICSLDEKTRRLGLPEVQI|GLLPGSGGTQRLPRLIGVSSAALDIILTRQLKAKQ|AQRLGV  
tr|A0A1I5DWI7|A0A1I5DWI7\_9GAMM|ARICSLDEKTRRLGLPEVQI|GLLPGSGGTQRLPRLIGVSSAALDIILTRQLKAKQ|AQRLGV  
tr|A0A1I7GWY6|A0A1I7GWY6\_9GAMM|ARICSLDDKTRRLGLPEVQI|GLLPGSGGTQRLPRLIGVSSAALDMILTRQLKAKQ|AQRLGV  
tr|D3VKY8|D3VKY8\_XENNA|ARICSLDERTRLGLPEVQI|GLLPGSGGTQRLPRLIGVSSAALDMILTRQLKAKQ|AQRLGV  
tr|A0A2G0Q6Q9|A0A2G0Q6Q9\_9GAMM|ARICSLDEKTRRLGLPEVQI|GLLPGSGGTQRLPRLIGVSSAALDMILTRQLKAKQ|AQRLGV  
tr|A0A2D0JU24|A0A2D0JU24\_9GAMM|ARICSLDDKTRRLGLPEVQI|GLLPGSGGTQRLPRLIGVSSAALDMILTRQLKAKQ|AQRLGV  
tr|A0A0J5FN38|A0A0J5FN38\_9GAMM|ARICSLDDKTRRLGLPEVQI|GLLPGSGGTQRLPRLIGVSSAALDMILTRQLKAKQ|AQRLGV  
tr|A0A432XLD4|A0A432XLD4\_9GAMM|YRIVATDSGKTIVGLPEVQI|GLLPGSGGTQRLPRLIGVSSAALDMILTRQLKAKQ|AKKGLI  
tr|A0A2D8HU84|A0A2D8HU84\_9GAMM|YRIVCTDNSKTRALGLPEVQI|GLLPGSGGTQRLPRLIGVSSAALDMILTRQLKAKQ|AKKAGL  
tr|A0A656X1Q2|A0A656X1Q2\_9GAMM|YRIVCTDNSKTRALGLPEVQI|GLLPGSGGTQRLPRLIGVSSAALDMILTRQLKAKQ|AKKAGL  
tr|A0A4Q1QH79|A0A4Q1QH79\_9GAMM|YRIVCTDNSKTRALGLPEVQI|GLLPGSGGTQRLPRLIGVSSAALDMILTRQLKAKQ|AKKAGL  
tr|A0A1G7LQE6|A0A1G7LQE6\_9GAMM|YRIVCTDNSKTRALGLPEVQI|GLLPGSGGTQRLPRLIGVSSAALDMILTRQLKAKQ|AKKAGL  
tr|A0A432YV7|A0A432YV7\_9GAMM|YRIVCTDNSKTRALGLPEVQI|GLLPGSGGTQRLPRLIGVSSAALDMILTRQLKAKQ|AKKAGL  
tr|A0A1J5N0P5|A0A1J5N0P5\_9GAMM|YRIVCTNDPKTVLGLPEVQI|GLLPGSGGTQRLPRLIGVSSAALDMILTRQLKAKQ|AKKAGL  
tr|A0A0D8D548|A0A0D8D548\_9GAMM|YRIVCTDSPKTRALGLPEVQI|GLLPGSGGTQRLPRLIGVSSAALDMILTRQLKAKQ|AKKAGL  
tr|A0A3E0TNM2|A0A3E0TNM2\_9GAMM|ARICSDSPKTRALGLPEVQI|GLLPGGGTQRLPRLIGVSSAALDMILTRQLKAKQ|AKKAGL  
tr|A0A3E0UD67|A0A3E0UD67\_9GAMM|ARICSDSPKTRALGLPEVQI|GLLPGGGTQRLPRLIGVSSAALDMILTRQLKAKQ|AKKAGL  
tr|A0A3E0U0P4|A0A3E0U0P4\_9GAMM|ARICSDSPKTRALGLPEVQI|GLLPGGGTQRLPRLIGVSSAALDMILTRQLKAKQ|AKKAGL  
tr|A0A0M2V8B1|A0A0M2V8B1\_9GAMM|YRIVATDSVKTIVGLPEVQI|GLLPGSGGTQRLPRLIGVSSAALDMILTRQLKAKQ|AKKAGL  
tr|A0A285ITY5|A0A285ITY5\_9GAMM|YRIVATDSAKTIVGLPEVQI|GLLPGSGGTQRLPRLIGVSSAALDMILTRQLKAKQ|AKKAGL  
tr|A0A486XTB9|A0A486XTB9\_9GAMM|YRIVATTDNKTIVGLPEVQI|GLLPGSGGTQRLPRLIGVSSAALDMILTRQLKAKQ|AKKAGL  
tr|I1E1G1|I1E1G1\_9GAMM|YRIVATSDSKTIVGLPEVQI|GLLPGSGGTQRLPRLIGVSSAALDMILTRQLKAKQ|AKKAGL  
tr|A0A1H6KJ68|A0A1H6KJ68\_9GAMM|YRIVASNDNKTIVGLPEVQI|GLLPGSGGTQRLPRLIGVSSAALDMILTRQLKAKQ|AKKAGL  
tr|A0A0X3Y764|A0A0X3Y764\_9GAMM|YRIVASNDNKTIVGLPEVQI|GLLPGSGGTQRLPRLIGVSSAALDMILTRQLKAKQ|AKKAGL  
tr|A0A2N1YEV4|A0A2N1YEV4\_9GAMM|YRIVASNDNKTIVGLPEVQI|GLLPGSGGTQRLPRLIGVSSAALDMILTRQLKAKQ|AKKAGL  
tr|A0A3P3QCM3|A0A3P3QCM3\_9GAMM|YRIVATTDNKTIVGLPEVQI|GLLPGSGGTQRLPRLIGVSSAALDMILTRQLKAKQ|AKKAGL  
tr|F7NT72|F7NT72\_9GAMM|YRIVATTDNKTIVGLPEVQI|GLLPGSGGTQRLPRLIGVSSAALDMILTRQLKAKQ|AKKAGL  
tr|A0A3S2TW63|A0A3S2TW63\_9GAMM|YRIVATTDNKTIVGLPEVQI|GLLPGSGGTQRLPRLIGVSSAALDMILTRQLKAKQ|AKKAGL  
tr|A0A3D5BGW7|A0A3D5BGW7\_9GAMM|YRIVATDDGKTIVGLPEVQI|GLLPGSGGTQRLPRLIGVSSAALDMILTRQLKAKQ|AKKAGL  
tr|A0A5C7T117|A0A5C7T117\_9GAMM|YRIVATDDAKTIVGLPEVQI|GLLPGSGGTQRLPRLIGVSSAALDMILTRQLKAKQ|AKKAGL  
tr|A0A0U4W982|A0A0U4W982\_9GAMM|YRIVATDDNKTIVGLPEVQI|GLLPGSGGTQRLPRLIGVSSAALDMILTRQLKAKQ|AKKAGL  
tr|A0A2I0FCM2|A0A2I0FCM2\_9GAMM|YRIVCTESTKTIVGLPEVQI|GLLPGSGGTQRLPRLIGVSSAALDMILTRQLKAKQ|AKKAGL  
tr|A0A2G2IVL1|A0A2G2IVL1\_9GAMM|YRIVCTESTKTIVGLPEVQI|GLLPGSGGTQRLPRLIGVSSAALDMILTRQLKAKQ|AKKAGL  
tr|A6FT21|A6FT21\_9GAMM|YRIVCTESTKTIVGLPEVQI|GLLPGSGGTQRLPRLIGVSSAALDMILTRQLKAKQ|AKKAGL  
tr|A0A4U1BNR2|A0A4U1BNR2\_9GAMM|YRIVISNSPKTRALGLPEVQI|GLLPGGGTQRLPRLIGVSSAALDMILTRQLKAKQ|AKKAGL  
tr|E1SQ60|E1SQ60\_FERBD|YRIVCTSDSAKTIVGLPEVQI|GLLPGGGTQRLPRLIGVSSAALDMILTRQLKAKQ|AKKAGL  
tr|A0A4Y6IZ09|A0A4Y6IZ09\_9GAMM|YRIVCSDSNKTIVGLPEVQI|GLLPGGGTQRLPRLIGVSSAALDMILTRQLKAKQ|AKKAGL  
tr|A0A0C3QSZ7|A0A0C3QSZ7\_9GAMM|YRIVCTDSKKTIVGLPEVQI|GLLPGGGTQRLPRLIGVSSAALDMILTRQLKAKQ|AKKAGL  
tr|A0A6L7HXW0|A0A6L7HXW0\_9GAMM|YRIVCTDSKKTIVGLPEVQI|GLLPGGGTQRLPRLIGVSSAALDMILTRQLKAKQ|AKKAGL  
sp|A3QFP3|FADJ\_SHELP|YRIVCTDSNKTIVGLPEVQI|GLLPGGGTQRLPRLIGVSSAALDMILTRQLKAKQ|AKKAGL  
tr|A0A1E5IXH7|A0A1E5IXH7\_SHECO|YRIVCTDSNKTIVGLPEVQI|GLLPGGGTQRLPRLIGVSSAALDMILTRQLKAKQ|AKKAGL  
tr|A0A411PKQ0|A0A411PKQ0\_9GAMM|YRIVCTDDAKTIVGLPEVQI|GLLPGGGTQRLPRLIGVSSAALDMILTRQLKAKQ|AKKAGL  
tr|A0A6G9QKM3|A0A6G9QKM3\_9GAMM|YRIVCSDDKKTIVGLPEVQI|GLLPGGGTQRLPRLIGVSSAALDMILTRQLKAKQ|AKKAGL  
tr|A0A6P1UL63|A0A6P1UL63\_9GAMM|YRIVCSDDKKTIVGLPEVQI|GLLPGGGTQRLPRLIGVSSAALDMILTRQLKAKQ|AKKAGL  
tr|A0A2N1ERI9|A0A2N1ERI9\_9GAMM|YRIVCSDDKKTIVGLPEVQI|GLLPGGGTQRLPRLIGVSSAALDMILTRQLKAKQ|AKKAGL  
tr|A0A7W4FU55|A0A7W4FU55\_9GAMM|YRIVCSDDKKTIVGLPEVQI|GLLPGGGTQRLPRLIGVSSAALDMILTRQLKAKQ|AKKAGL  
sp|Q8ECP7|FADJ\_SHEON|YRIVCSDDGKTIVGLPEVQI|GLLPGGGTQRLPRLIGVSSAALDMILTRQLKAKQ|AKKAGL  
tr|A0A501XZY8|A0A501XZY8\_9GAMM|YRIVCSDDGKTIVGLPEVQI|GLLPGGGTQRLPRLIGVSSAALDMILTRQLKAKQ|AKKAGL  
tr|A0A2W5DCZ0|A0A2W5DCZ0\_SHEOE|YRIVCSDDGKTIVGLPEVQI|GLLPGGGTQRLPRLIGVSSAALDMILTRQLKAKQ|AKKAGL  
tr|A0A1E3V3C8|A0A1E3V3C8\_9GAMM|YRIVCSDDGKTIVGLPEVQI|GLLPGGGTQRLPRLIGVSSAALDMILTRQLKAKQ|AKKAGL  
tr|A0A1Z4AI20|A0A1Z4AI20\_9GAMM|YRIVCSDDGKTIVGLPEVQI|GLLPGGGTQRLPRLIGVSSAALDMILTRQLKAKQ|AKKAGL  
tr|A0A7X9LJL9|A0A7X9LJL9\_9GAMM|YRIVCSDDGKTIVGLPEVQI|GLLPGGGTQRLPRLIGVSSAALDMILTRQLKAKQ|AKKAGL  
tr|A0A073KMY5|A0A073KMY5\_9GAMM|YRIVCSDDGKTIVGLPEVQI|GLLPGGGTQRLPRLIGVSSAALDMILTRQLKAKQ|AKKAGL  
sp|A0KV76|FADJ\_SHESA|YRIVCSDDGKTIVGLPEVQI|GLLPGGGTQRLPRLIGVSSAALDMILTRQLKAKQ|AKKAGL  
tr|A0A220UTH7|A0A220UTH7\_9GAMM|YRIVCSDDGKTIVGLPEVQI|GLLPGGGTQRLPRLIGVSSAALDMILTRQLKAKQ|AKKAGL  
tr|A0A5B8R6W1|A0A5B8R6W1\_9GAMM|YRIVCSDDGKTIVGLPEVQI|GLLPGGGTQRLPRLIGVSSAALDMILTRQLKAKQ|AKKAGL  
tr|V1DAI4|V1DAI4\_9GAMM|YRIVCSDDGKTIVGLPEVQI|GLLPGGGTQRLPRLIGVSSAALDMILTRQLKAKQ|AKKAGL  
tr|A0A448CPQ4|A0A448CPQ4\_SHEPU|YRIVCSDDGKTIVGLPEVQI|GLLPGGGTQRLPRLIGVSSAALDMILTRQLKAKQ|AKKAGL  
tr|A0A252ERQ3|A0A252ERQ3\_SHEPU|YRIVCSDDGKTIVGLPEVQI|GLLPGGGTQRLPRLIGVSSAALDMILTRQLKAKQ|AKKAGL  
sp|Q0HKD1|FADJ\_SHESM|YRIVCSDDGKTIVGLPEVQI|GLLPGGGTQRLPRLIGVSSAALDMILTRQLKAKQ|AKKAGL  
sp|Q0HWN3|FADJ\_SHESR|YRIVCSDDGKTIVGLPEVQI|GLLPGGGTQRLPRLIGVSSAALDMILTRQLKAKQ|AKKAGL  
tr|F7RQE3|F7RQE3\_9GAMM|YRIVCSDDGKTIVGLPEVQI|GLLPGGGTQRLPRLIGVSSAALDMILTRQLKAKQ|AKKAGL  
tr|B8EE98|B8EE98\_SHEB2|YRIVCSDDGKTIVGLPEVQI|GLLPGGGTQRLPRLIGVSSAALDMILTRQLKAKQ|AKKAGL  
sp|A6WQ25|FADJ\_SHEB8|YRIVCSDDGKTIVGLPEVQI|GLLPGGGTQRLPRLIGVSSAALDMILTRQLKAKQ|AKKAGL  
tr|A0A448EK41|A0A448EK41\_9GAMM|YRIVCSDDGKTIVGLPEVQI|GLLPGGGTQRLPRLIGVSSAALDMILTRQLKAKQ|AKKAGL  
tr|A0A553JHX1|A0A553JHX1\_SHEHA|YRIVCSDDNKTIVGLPEVQI|GLLPGGGTQRLPRLIGVSSAALDMILTRQLKAKQ|AKKAGL  
tr|B8CPY6|B8CPY6\_SHEFW|YRIVCSLNSKTIVGLPEVQI|GLLPGGGTQRLPRLIGVSSAALDMILTRQLKAKQ|AKKAGL  
tr|A0A431WFC4|A0A431WFC4\_9GAMM|YRIVCSLNSKTIVGLPEVQI|GLLPGGGTQRLPRLIGVSSAALDMILTRQLKAKQ|AKKAGL  
tr|A8FTR7|A8FTR7\_SHESH|YRIVCSLNSKTIVGLPEVQI|GLLPGGGTQRLPRLIGVSSAALDMILTRQLKAKQ|AKKAGL  
tr|A0A431WNL0|A0A431WNL0\_9GAMM|YRIVCSLNSKTIVGLPEVQI|GLLPGGGTQRLPRLIGVSSAALDMILTRQLKAKQ|AKKAGL  
tr|A0A550AEC5|A0A550AEC5\_9GAMM|YRIVCSLNTKTIVGLPEVQI|GLLPGGGTQRLPRLIGVSSAALDMILTRQLKAKQ|AKKAGL  
tr|A0A7L4WW90|A0A7L4WW90\_9GAMM|YRIVCSLNTKTIVGLPEVQI|GLLPGGGTQRLPRLIGVSSAALDMILTRQLKAKQ|AKKAGL  
tr|A9DDU3|A9DDU3\_9GAMM|YRIVCSQNSKTIVGLPEVQI|GLLPGGGTQRLPRLIGVSSAALDMILTRQLKAKQ|AKKAGL  
tr|A0A330M2B9|A0A330M2B9\_9GAMM|YRIVCSQNSKTIVGLPEVQI|GLLPGGGTQRLPRLIGVSSAALDMILTRQLKAKQ|AKKAGL  
tr|A0A5N8UFC7|A0A5N8UFC7\_9GAMM|YRIVCSQNSKTIVGLPEVQI|GLLPGGGTQRLPRLIGVSSAALDMILTRQLKAKQ|AKKAGL  
tr|A0A1S6HN57|A0A1S6HN57\_9GAMM|YRIVCSQNSKTIVGLPEVQI|GLLPGGGTQRLPRLIGVSSAALDMILTRQLKAKQ|AKKAGL  
tr|D4ZMH7|D4ZMH7\_SHEVD|YRIVCSQNSKTIVGLPEVQI|GLLPGGGTQRLPRLIGVSSAALDMILTRQLKAKQ|AKKAGL  
tr|A0A3L8Q213|A0A3L8Q213\_9GAMM|ARICSDDDAKTIVGLPEVQI|GLLPGGGTQRLPRLIGVSSAALDMILTRQLKAKQ|AKKAGL  
tr|A0A3A6U4N9|A0A3A6U4N9\_9GAMM|YRIVCSDDKTRALGLPEVQI|GLLPGGGTQRLPRLIGVSSAALDMILTRQLKAKQ|AKKAGL  
tr|A0A4Q5MA37|A0A4Q5MA37\_9GAMM|YRIVCSQNSKTIVGLPEVQI|GLLPGGGTQRLPRLIGVSSAALDMILTRQLKAKQ|AKKAGL  
tr|A0A1L6LSX5|A0A1L6LSX5\_9DELTA|YRIVLSDDKKTIVGLPEVQI|GLLPGLNGLERLAAVLGLQVALDYGLTGKNMRAAK|AKSLGV  
tr|A0A2W4L9B9|A0A2W4L9B9\_9PROT|YRIVLASLARHTKTRGLPEVQI|GLLPAGAGGTQRLPRLIGVSSAALDIILTRQLKAKQ|AKRMLG  
tr|A0A2W4M4E6|A0A2W4M4E6\_9PROT|YRIVATNDPRTKTRGLPEVQI|GLLPGLGGTQRLPRLIGVSSAALDIILTRQLKAKQ|AKRMLG  
tr|A0A6I2GRX9|A0A6I2GRX9\_9DELTA|YRIVATADSPKTRALGLPEVQI|GLLPAGAGGTQRLPRLIGVSSAALDIILTRQLKAKQ|AKKGLI  
tr|A0A0H4WMK2|A0A0H4WMK2\_9DELTA|YRIVATADSPKTSIVGLPEVQI|GLLPAGAGGTQRLPRLIGVSSAALDIILTRQLKAKQ|AKKGLV  
tr|F8CJ36|F8CJ36\_MYXFH|YRIVATADSPKTSIVGLPEVQI|GLLPAGAGGTQRLPRLIGVSSAALDIILTRQLKAKQ|AKKGLV  
tr|A0A250K0F1|A0A250K0F1\_9DELTA|YRIVATADSPKTSIVGLPEVQI|GLLPAGAGGTQRLPRLIGVSSAALDIILTRQLKAKQ|AKKGLV  
tr|A0A7Y6WFZ2|A0A7Y6WFZ2\_9DELTA|YRIVATADSPKTSIVGLPEVQI|GLLPAGAGGTQRLPRLIGVSSAALDIILTRQLKAKQ|AKKGLV  
tr|A0A7Y7C660|A0A7Y7C660\_9DELTA|YRIVATADSPKTSIVGLPEVQI|GLLPAGAGGTQRLPRLIGVSSAALDIILTRQLKAKQ|AKKGLV  
tr|A0A7Y4JFH2|A0A7Y4JFH2\_MYXXA|YRIVATADSPKTSIVGLPEVQI|GLLPAGAGGTQRLPRLIGVSSAALDIILTRQLKAKQ|AKKGLV  
tr|A0A4Y6CZQ9|A0A4Y6CZQ9\_MYXXA|YRIVATADSPKTSIVGLPEVQI|GLLPAGAGGTQRLPRLIGVSSAALDIILTRQLKAKQ|AKKGLV

|               |                  |    |   |   |   |   |   |   |   |   |   |   |   |   |   |   |   |   |   |   |   |   |   |   |   |   |   |   |   |   |   |   |   |   |   |   |   |   |   |   |   |   |   |   |   |   |   |   |   |   |   |   |   |   |   |   |   |   |   |   |   |
|---------------|------------------|----|---|---|---|---|---|---|---|---|---|---|---|---|---|---|---|---|---|---|---|---|---|---|---|---|---|---|---|---|---|---|---|---|---|---|---|---|---|---|---|---|---|---|---|---|---|---|---|---|---|---|---|---|---|---|---|---|---|---|---|
| tr A0A7Y4IKV5 | A0A7Y4IKV5_MYXXA | YR | F | A | T | D | S | P | K | T | S | L | G | L | P | E | V | Q | I | G | L | I | P | G | A | G | G | T | Q | R | L | P | A | L | I | G | V | Q | A | A | L | D | L | I | L | T | G | K | S | L | K | P | A | K | A | K | L | G | V |   |   |
| tr A0A511HHB0 | A0A511HHB0_9DELT | YR | F | A | T | D | S | P | K | T | S | L | G | L | P | E | V | Q | I | G | L | I | P | G | A | G | G | T | Q | R | L | P | A | L | I | G | V | Q | A | A | L | D | L | I | L | T | G | K | S | L | K | P | A | K | A | K | L | G | V |   |   |
| tr A0A4Y6CKY7 | A0A4Y6CKY7_MYXXA | YR | F | A | T | D | S | P | K | T | S | L | G | L | P | E | V | Q | I | G | L | I | P | G | A | G | G | T | Q | R | L | P | A | L | I | G | V | Q | A | A | L | D | L | I | L | T | G | K | S | L | K | P | A | K | A | K | L | G | V |   |   |
| tr Q1D1F2     | Q1D1F2_MYXXD     | YR | F | A | T | D | S | P | K | T | S | L | G | L | P | E | V | Q | I | G | L | I | P | G | A | G | G | T | Q | R | L | P | A | L | I | G | V | Q | A | A | L | D | L | I | L | T | G | K | S | L | K | P | A | K | A | K | L | G | V |   |   |
| tr A0A7Y4MA14 | A0A7Y4MA14_MYXXA | YR | F | A | T | D | S | P | K | T | S | L | G | L | P | E | V | Q | I | G | L | I | P | G | A | G | G | T | Q | R | L | P | A | L | I | G | V | Q | A | A | L | D | L | I | L | T | G | K | S | L | K | P | A | K | A | K | L | G | V |   |   |
| tr A0A7T8Y4N9 | A0A7T8Y4N9_MYXXA | YR | F | A | T | D | S | P | K | T | S | L | G | L | P | E | V | Q | I | G | L | I | P | G | A | G | G | T | Q | R | L | P | A | L | I | G | V | Q | A | A | L | D | L | I | L | T | G | K | S | L | K | P | A | K | A | K | L | G | V |   |   |
| tr L7UE67     | L7UE67_MYXSD     | YR | F | A | T | D | S | P | K | T | L | G | L | P | E | V | Q | I | G | L | L | P | G | A | G | G | T | Q | R | L | P | A | L | I | G | A | Q | T | A | L | D | L | I | L | T | G | K | S | V | K | P | S | K | A | R | K | L | G | I |   |   |
| tr A0A511T9X1 | A0A511T9X1_MYXFU | YR | F | A | T | D | S | P | K | T | L | G | L | P | E | V | Q | I | G | L | L | P | G | A | G | G | T | Q | R | L | P | A | L | I | G | A | Q | A | A | L | D | L | I | L | T | G | K | N | V | K | P | S | K | A | R | K | L | G | I |   |   |
| tr A0A7Y7C9C4 | A0A7Y7C9C4_9DELT | YR | F | A | T | D | S | P | K | T | L | G | L | P | E | V | Q | I | G | L | I | P | G | A | G | G | T | Q | R | L | P | A | L | I | G | V | Q | A | A | L | D | L | I | L | T | G | K | N | V | K | P | S | K | A | K | L | G | I |   |   |   |
| tr A0A540X7W8 | A0A540X7W8_9DELT | YR | F | A | T | D | S | P | R | T | L | G | L | P | E | V | Q | I | G | L | I | P | G | A | G | G | T | Q | R | L | P | A | L | I | G | V | Q | A | A | L | D | L | I | L | T | G | K | S | V | K | P | S | K | A | K | L | G | I |   |   |   |
| tr A0A3A8FK19 | A0A3A8FK19_9DELT | YR | F | A | T | D | S | P | K | T | L | G | L | P | E | V | Q | I | G | L | I | P | G | A | G | G | T | Q | R | L | P | A | L | I | G | A | Q | A | A | L | D | L | I | L | T | G | K | N | V | K | P | S | K | A | K | L | G | L |   |   |   |
| tr A0A3A8JQL9 | A0A3A8JQL9_9DELT | YR | F | A | T | D | S | P | K | S | V | V | L | P | E | T | Q | I | G | L | I | P | G | A | G | G | T | Q | R | L | P | A | L | I | G | A | Q | A | A | L | D | L | I | L | T | G | K | N | V | K | P | S | K | A | K | L | G | I |   |   |   |
| tr A0A7Y4NFA4 | A0A7Y4NFA4_9DELT | YR | F | A | T | D | S | P | K | S | V | V | L | P | E | T | Q | I | G | L | I | P | G | A | G | G | T | Q | R | L | P | A | L | I | G | A | Q | A | A | L | D | L | I | L | T | G | K | N | V | K | P | S | K | A | K | L | G | I |   |   |   |
| tr A0A3A8HDQ7 | A0A3A8HDQ7_9DELT | YR | F | A | T | D | S | P | K | S | V | V | L | P | E | T | Q | I | G | L | I | P | G | A | G | G | T | Q | R | L | P | A | L | I | G | A | Q | A | A | L | D | L | I | L | T | G | K | N | V | K | P | S | K | A | K | L | G | I |   |   |   |
| tr A0A3A8GR90 | A0A3A8GR90_9DELT | YR | F | A | T | D | S | P | K | S | V | V | L | P | E | T | Q | I | G | L | I | P | G | A | G | G | T | Q | R | L | P | A | L | I | G | A | Q | A | A | L | D | L | I | L | T | G | K | N | V | K | P | S | K | A | K | L | G | I |   |   |   |
| tr A0A3A8SBD7 | A0A3A8SBD7_9DELT | YR | F | A | T | D | S | P | K | S | V | V | L | P | E | T | Q | I | G | L | I | P | G | A | G | G | T | Q | R | L | P | A | L | I | G | A | E | A | A | L | D | L | I | L | T | G | K | N | V | K | P | S | K | A | K | L | G | V |   |   |   |
| tr A0A3A8T0I8 | A0A3A8T0I8_9DELT | YR | F | A | T | D | S | P | K | S | V | V | L | P | E | T | Q | I | G | L | I | P | G | A | G | G | T | Q | R | L | P | A | L | I | G | A | E | A | A | L | D | L | I | L | T | G | K | N | V | K | P | S | K | A | K | L | G | L |   |   |   |
| tr A0A7X5BU07 | A0A7X5BU07_9DELT | YR | F | A | T | D | S | P | K | S | V | V | L | P | E | T | Q | I | G | L | I | P | G | A | G | G | T | Q | R | L | P | A | L | I | G | A | E | A | A | L | D | L | I | L | T | G | K | N | V | K | P | S | K | A | K | L | G | V |   |   |   |
| tr A0A7Y1RVL2 | A0A7Y1RVL2_9DELT | YR | F | A | T | D | S | P | K | S | V | V | L | P | E | T | Q | I | G | L | I | P | G | A | G | G | T | Q | R | L | P | A | L | I | G | A | E | A | A | L | D | L | I | L | T | G | K | N | V | K | P | S | K | A | K | L | G | V |   |   |   |
| tr A0A3A8THN2 | A0A3A8THN2_9DELT | YR | F | A | T | D | S | P | K | S | V | V | L | P | E | T | Q | I | G | L | I | P | G | A | G | G | T | Q | R | L | P | A | L | I | G | A | E | A | A | L | D | L | I | L | T | G | K | N | V | K | P | S | K | A | K | L | G | V |   |   |   |
| tr A0A7Y1RX76 | A0A7Y1RX76_9DELT | YR | F | A | T | D | S | P | K | S | V | V | L | P | E | T | Q | I | G | L | I | P | G | A | G | G | T | Q | R | L | P | A | L | I | G | A | E | A | A | L | D | L | I | L | T | G | K | N | V | K | P | S | K | A | K | L | G | V |   |   |   |
| tr A0A3A8RA58 | A0A3A8RA58_9DELT | YR | F | A | T | D | S | P | K | S | V | V | L | P | E | T | Q | I | G | L | I | P | G | A | G | G | T | Q | R | L | P | A | L | I | G | A | Q | A | A | L | D | L | I | L | T | G | K | N | V | K | P | S | K | A | K | L | G | I |   |   |   |
| tr A0A410RPB6 | A0A410RPB6_CORCK | YR | F | A | T | D | S | P | K | S | V | V | L | P | E | T | Q | I | G | L | I | P | G | A | G | G | T | Q | R | L | P | A | L | I | G | A | E | A | A | L | D | L | I | L | T | G | K | N | V | K | P | S | K | A | K | L | G | I |   |   |   |
| tr A0A7Y4J474 | A0A7Y4J474_CORCK | YR | F | A | T | D | S | P | K | S | V | V | L | P | E | T | Q | I | G | L | I | P | G | A | G | G | T | Q | R | L | P | A | L | I | G | A | E | A | A | L | D | L | I | L | T | G | K | N | V | K | P | S | K | A | K | L | G | I |   |   |   |
| tr A0A3A8I9Z6 | A0A3A8I9Z6_9DELT | YR | F | A | T | D | S | P | K | S | V | V | L | P | E | T | Q | I | G | L | I | P | G | A | G | G | T | Q | R | L | P | A | L | I | G | A | E | A | A | L | D | L | I | L | T | G | K | N | V | K | P | S | K | A | K | L | G | I |   |   |   |
| tr H8MKE9     | H8MKE9_CORCM     | YR | F | A | T | D | S | P | K | S | V | V | L | P | E | T | Q | I | G | L | I | P | G | A | G | G | T | Q | R | L | P | A | L | I | G | A | E | A | A | L | D | L | I | L | T | G | K | N | V | K | P | S | K | A | K | L | G | I |   |   |   |
| tr A0A3A8H102 | A0A3A8H102_9DELT | YR | F | A | T | D | S | P | K | S | V | V | L | P | E | T | Q | I | G | L | I | P | G | A | G | G | T | Q | R | L | P | A | L | I | G | A | E | A | A | L | D | L | I | L | T | G | K | N | V | K | P | S | K | A | K | L | G | I |   |   |   |
| tr A0A554FW33 | A0A554FW33_9DELT | YR | F | A | T | D | S | P | K | T | L | G | L | P | E | T | Q | I | G | L | I | P | G | A | G | G | T | Q | R | L | P | A | L | I | G | A | Q | A | A | L | D | L | I | L | T | G | K | S | V | K | P | S | K | A | K | L | G | I |   |   |   |
| tr A0A3A8NPC0 | A0A3A8NPC0_9DELT | YR | F | A | T | D | S | P | K | T | S | L | G | L | P | E | T | Q | I | G | L | I | P | G | A | G | G | T | Q | R | L | P | A | L | I | G | A | Q | A | A | L | D | L | I | L | T | G | K | N | V | K | A | S | K | A | K | L | G | V |   |   |
| tr A0A3A8JUV3 | A0A3A8JUV3_9DELT | YR | F | A | T | D | S | P | K | T | S | L | G | L | P | E | T | Q | I | G | L | I | P | G | A | G | G | T | Q | R | L | P | A | L | I | G | A | Q | A | A | L | D | L | I | L | T | G | K | N | V | K | A | S | K | A | K | L | G | I |   |   |
| tr A0A3A8NEX6 | A0A3A8NEX6_9DELT | YR | F | A | T | D | S | P | K | T | S | L | G | L | P | E | T | Q | I | G | L | I | P | G | A | G | G | T | Q | R | L | P | A | L | I | G | A | Q | A | A | L | D | L | I | L | T | G | K | N | V | K | A | S | K | A | K | L | G | V |   |   |
| tr A0A3A8JEU8 | A0A3A8JEU8_9DELT | YR | F | A | T | D | S | P | K | T | S | L | G | L | P | E | T | Q | I | G | L | I | P | G | A | G | G | T | Q | R | L | P | A | L | I | G | A | Q | A | A | L | D | L | I | L | T | G | K | N | V | K | A | S | K | A | K | L | G | I |   |   |
| tr A0A3A8LI76 | A0A3A8LI76_9DELT | YR | F | A | T | D | S | P | K | T | S | L | G | L | P | E | T | Q | I | G | L | I | P | G | A | G | G | T | Q | R | L | P | A | L | I | G | A | Q | A | A | L | D | L | I | L | T | G | K | N | V | K | A | S | K | A | K | L | G | I |   |   |
| tr A0A085WXN8 | A0A085WXN8_9DELT | YR | F | A | T | D | S | P | K | T | L | G | L | P | E | T | Q | I | G | L | L | P | G | A | G | G | T | Q | R | L | P | A | L | I | G | A | Q | A | A | L | D | L | I | L | A | G | K | T | V | K | P | S | K | A | K | R | L | G | L |   |   |
| tr A0A2T4V0M5 | A0A2T4V0M5_9DELT | YR | F | A | T | D | S | P | K | T | L | G | L | P | E | T | Q | I | G | L | I | P | G | A | G | G | T | Q | R | L | P | A | L | I | G | A | E | A | A | L | D | L | I | L | T | G | K | N | V | K | P | S | K | A | K | L | G | L |   |   |   |
| tr A0A0G2ZSW5 | A0A0G2ZSW5_9DELT | YR | F | A | T | D | S | P | K | T | L | G | L | P | E | V | Q | I | G | L | I | P | G | A | G | G | T | Q | R | L | P | A | L | I | G | V | Q | A | A | L | D | L | I | L | T | G | K | N | V | K | P | S | K | A | K | L | G | L |   |   |   |
| tr A0A3M2DKY0 | A0A3M2DKY0_9DELT | AR | V | A | S | D | S | R | K | T | L | G | L | P | E | V | K | I | G | L | L | P | G | A | G | G | T | Q | R | L | P | R | L | P | R | L | I | G | V | Q | A | A | L | D | L | M | L | T | G | K | S | L | R | A | G | K | A | R | S | L | G |
| tr A0A661NQ58 | A0A661NQ58_9DELT | AR | V | A | S | D | H | R | K | T | L | G | L | P | E | V | Q | I | G | L | L | P | G | A | G | G | T | Q | R | L | P | R | L |   |   |   |   |   |   |   |   |   |   |   |   |   |   |   |   |   |   |   |   |   |   |   |   |   |   |   |   |

ECHA\_HUMAN

220 230 240 250

| ECHA_HUMAN                      |                      | 00000000000000000000 |
|---------------------------------|----------------------|----------------------|
| tr A0A4R6XLA8 A0A4R6XLA8_9GAMM  | VDQLVEPLGPGLKPEERTIE | YLEEVAITFAKGL        |
| tr A0A6A01JT2 A0A6A01JT2_9BACT  | VDALVHKEG            | LYQAAALKVANSPI       |
| tr A0A7V3QZU7 A0A7V3QZU7_9BACT  | VDALVHKEG            | LVETAALKALGL         |
| tr A0A7V4SYJ6 A0A7V4SYJ6_9BACT  | VDALVHKEG            | IEETAIRAALGL         |
| tr A0A2A8D2N6 A0A2A8D2N6_9BACT  | VSALVHKEG            | LVETAALARRL          |
| tr A0A2N1TGP0 A0A2N1TGP0_9SPIR  | VDAIHPHG             | LHRAAVEAKAL          |
| tr A0A1G3QG4 A0A1G3QG4_9SPIR    | IDIVSPYG             | MEDIAAKAKDL          |
| tr A0A1G3QTY3 A0A1G3QTY3_9SPIR  | IDIVVPPYG            | LAEIGVTRALEL         |
| tr A0A7X9L359 A0A7X9L359_9DELT  | IDIVVPPYG            | LRIGVKKATEL          |
| tr A0A522CJY0 A0A522CJY0_9SPIR  | VDEVVVFHG            | MKDIAVKKALDL         |
| tr A0A2N1RRJ3 A0A2N1RRJ3_9SPIR  | VDKVVIPYG            | MREVAITIALDL         |
| tr A0A2N2KFN7 A0A2N2KFN7_9DELT  | VDELVPLYG            | LKETALKITAGL         |
| tr A0A1V6AXX9 A0A1V6AXX9_9DELT  | VDELIAPYG            | AKETAVKKALEL         |
| tr A0A2N2HZL0 A0A2N2HZL0_9DELT  | VDELIAPYG            | IKETAVKKALEL         |
| tr A0A5E8ARP3 A0A5E8ARP3_9BACT  | VDELIAPYG            | AKETAVKKALEL         |
| tr A0A662A7B1 A0A662A7B1_9BACT  | VDELVYQPK            | LLDAVVKFARKL         |
| tr D7CV16 D7CV16_TRURR          | VDMIVDRPK            | LLTAAKKHALKI         |
| tr A0A3C2AKX4 A0A3C2AKX4_9FLAO  | VDELVYQPK            | VDAVVKKALEL          |
| tr A0A3B8ZLN3 A0A3B8ZLN3_9PLAN  | VDRATKEA             | LLDAIVLANQI          |
| tr A0A345UGV8 A0A345UGV8_9BACT  | VDRATKEA             | LLDAIVLANQI          |
| tr A0A6C1P6A2 A0A6C1P6A2_9BACT  | VDRATKEA             | LLDAIVLANQI          |
| tr A0A3M1X9W8 A0A3M1X9W8_9BACT  | VDRATKEA             | LLDAIVLANQI          |
| tr A0A354C796 A0A354C796_9DELT  | VDRATKEA             | LLDAIVLANQI          |
| tr A0A3M1NUM8 A0A3M1NUM8_9BACT  | VDRATKEA             | LLDAIVLANQI          |
| tr A0A3M2KRC8 A0A3M2KRC8_9BACT  | VDRATKEA             | LLDAIVLANQI          |
| tr A0A5S9IHR0 A0A5S9IHR0_9BACT  | VDRATKEA             | LLDAIVLANQI          |
| tr A0A6M1ST81 A0A6M1ST81_9BACT  | VDRATKEA             | LLDAIVLANQI          |
| tr A0A521AAE5 A0A521AAE5_9BACT  | VDRATKEA             | LLDAIVLANQI          |
| tr A0A1M4ZMD6 A0A1M4ZMD6_9BACT  | VDRATKEA             | LLDAIVLANQI          |
| tr A0A2A2GCS2 A0A2A2GCS2_9BACT  | VDRATKEA             | LLDAIVLANQI          |
| tr A0A5D3YIH7 A0A5D3YIH7_9BACT  | VDRATKEA             | LLDAIVLANQI          |
| tr A0A6M1T9G0 A0A6M1T9G0_9BACT  | VDRATKEA             | LLDAIVLANQI          |
| tr A0A6A8Q1Y8 A0A6A8Q1Y8_9BACT  | VDRATKEA             | LLDAIVLANQI          |
| tr A0A521BVJ3 A0A521BVJ3_9BACT  | VDRATKEA             | LLDAIVLANQI          |
| tr A0A359E0Y8 A0A359E0Y8_9BACT  | VDRATKEA             | LLDAIVLANQI          |
| tr A0A2D8CIM6 A0A2D8CIM6_9BACT  | VDRATKEA             | LLDAIVLANQI          |
| tr A0A2D9FWF5 A0A2D9FWF5_9BACT  | VDRATKEA             | LLDAIVLANQI          |
| tr A0A1B6YB70 A0A1B6YB70_9BACT  | VDRATKEA             | LLDAIVLANQI          |
| tr A0A2D4ZTC0 A0A2D4ZTC0_9BACT  | VDRATKEA             | LLDAIVLANQI          |
| tr A0A3D4UVW7 A0A3D4UVW7_9BACT  | VDRATKEA             | LLDAIVLANQI          |
| tr A0A3F3I3M2 A0A3F3I3M2_9BACT  | VDRATKEA             | LLDAIVLANQI          |
| tr A0A3D1G7L9 A0A3D1G7L9_9BACT  | VDRATKEA             | LLDAIVLANQI          |
| tr A0A3M8G1Y8 A0A3M8G1Y8_9BACT  | VDRATKEA             | LLDAIVLANQI          |
| tr A0A5Q4F391 A0A5Q4F391_9BACT  | VDRATKEA             | LLDAIVLANQI          |
| tr A0A6I7NPV0 A0A6I7NPV0_9BACT  | VDRATKEA             | LLDAIVLANQI          |
| tr A0A651G1J2 A0A651G1J2_9BACT  | VDRATKEA             | LLDAIVLANQI          |
| tr A0A371QRK5 A0A371QRK5_9BACT  | VDRATKEA             | LLDAIVLANQI          |
| tr A0A2N0VGJ5 A0A2N0VGJ5_9BACT  | VDRATKEA             | LLDAIVLANQI          |
| tr A0A316TYJ0 A0A316TYJ0_9BACT  | VDRATKEA             | LLDAIVLANQI          |
| tr A0A651GLZ8 A0A651GLZ8_9BACT  | VDRATKEA             | LLDAIVLANQI          |
| tr A0A7Y5V3S5 A0A7Y5V3S5_9BACT  | VDRATKEA             | LLDAIVLANQI          |
| tr A0A7W1SHC0 A0A7W1SHC0_9BACT  | VDRATKEA             | LLDAIVLANQI          |
| tr A0A7Y5PBT7 A0A7Y5PBT7_9BACT  | VDRATKEA             | LLDAIVLANQI          |
| tr A0A7Y5TXL8 A0A7Y5TXL8_9BACT  | VDRATKEA             | LLDAIVLANQI          |
| tr A0A423PQ96 A0A423PQ96_9GAMM  | VDRATKEA             | LLDAIVLANQI          |
| tr U2G066 U2G066_9GAMM          | VDRATKEA             | LLDAIVLANQI          |
| tr A0A2E0J1F4 A0A2E0J1F4_9GAMM  | VDRATKEA             | LLDAIVLANQI          |
| tr A0A2D4SCM8 A0A2D4SCM8_9GAMM  | VDRATKEA             | LLDAIVLANQI          |
| tr LOWJH1 LOWJH1_9GAMM          | VDRATKEA             | LLDAIVLANQI          |
| tr A0A1H5XF61 A0A1H5XF61_9GAMM  | VDRATKEA             | LLDAIVLANQI          |
| tr A0A2E9TS48 A0A2E9TS48_9GAMM  | VDRATKEA             | LLDAIVLANQI          |
| tr A0A095UE19 A0A095UE19_9GAMM  | VDRATKEA             | LLDAIVLANQI          |
| tr A0A7G2S9A0 A0A7G2S9A0_9GAMM  | VDRATKEA             | LLDAIVLANQI          |
| tr B5JU27 B5JU27_9GAMM          | VDRATKEA             | LLDAIVLANQI          |
| tr A0A1Y0IHP1 A0A1Y0IHP1_9GAMM  | VDRATKEA             | LLDAIVLANQI          |
| tr A0A316FZ14 A0A316FZ14_9GAMM  | VDRATKEA             | LLDAIVLANQI          |
| tr A0A498C231 A0A498C231_9GAMM  | VDRATKEA             | LLDAIVLANQI          |
| tr Q0A6T4 Q0A6T4_ALKEH          | VDRATKEA             | LLDAIVLANQI          |
| tr A0A3E0WL10 A0A3E0WL10_9GAMM  | VDRATKEA             | LLDAIVLANQI          |
| tr A0A3S1BU16 A0A3S1BU16_9GAMM  | VDRATKEA             | LLDAIVLANQI          |
| tr A0A7V8QFN9 A0A7V8QFN9_9GAMM  | VDRATKEA             | LLDAIVLANQI          |
| tr A0A1H8PPF9 A0A1H8PPF9_9GAMM  | VDRATKEA             | LLDAIVLANQI          |
| tr A0A6H0J0V7 A0A6H0J0V7_9GAMM  | VDRATKEA             | LLDAIVLANQI          |
| tr V5EZX6 V5EZX6_9VIBR          | VDRATKEA             | LLDAIVLANQI          |
| tr A0A6I1QBM2 A0A6I1QBM2_9VIBR  | VDRATKEA             | LLDAIVLANQI          |
| tr A0A511QRL5 A0A511QRL5_9VIBR  | VDRATKEA             | LLDAIVLANQI          |
| tr A0A7Y0JZP4 A0A7Y0JZP4_9VIBR  | VDRATKEA             | LLDAIVLANQI          |
| tr A0A193KD24 A0A193KD24_9VIBR  | VDRATKEA             | LLDAIVLANQI          |
| tr A0A1S1HM72 A0A1S1HM72_9PROST | VDRATKEA             | LLDAIVLANQI          |
| tr A0A7T8I613 A0A7T8I613_9GAMM  | VDRATKEA             | LLDAIVLANQI          |
| tr A0A140NIF0 A0A140NIF0_9PROM  | VDRATKEA             | LLDAIVLANQI          |
| tr A0A379GMB7 A0A379GMB7_9PROM  | VDRATKEA             | LLDAIVLANQI          |
| tr A0A379H393 A0A379H393_9PROST | VDRATKEA             | LLDAIVLANQI          |
| tr B2Q0L5 B2Q0L5_9PROST         | VDRATKEA             | LLDAIVLANQI          |
| tr A0A6I3JUE9 A0A6I3JUE9_9GAMM  | VDRATKEA             | LLDAIVLANQI          |
| tr A0A7D4P594 A0A7D4P594_9YERMW | VDRATKEA             | LLDAIVLANQI          |
| tr A0A7U7IVK6 A0A7U7IVK6_9YEREN | VDRATKEA             | LLDAIVLANQI          |
| tr A0A447RIF5 A0A447RIF5_9YEREN | VDRATKEA             | LLDAIVLANQI          |
| tr A0A7H4ZLV9 A0A7H4ZLV9_9YERP4 | VDRATKEA             | LLDAIVLANQI          |
| tr A0A0H3NX46 A0A0H3NX46_9YER1  | VDRATKEA             | LLDAIVLANQI          |
| tr A0A7T9XUV7 A0A7T9XUV7_9YEREN | VDRATKEA             | LLDAIVLANQI          |
| tr A0A7U7IYV8 A0A7U7IYV8_9YEREN | VDRATKEA             | LLDAIVLANQI          |
| tr A0A0H5G7G2 A0A0H5G7G2_9YEREN | VDRATKEA             | LLDAIVLANQI          |
| tr A0A2A7TDI2 A0A2A7TDI2_9YERKR | VDRATKEA             | LLDAIVLANQI          |
| tr A0A0T9M261 A0A0T9M261_9YERKR | VDRATKEA             | LLDAIVLANQI          |
| tr A0A0A0CMP1 A0A0A0CMP1_9PHOLU | VDRATKEA             | LLDAIVLANQI          |
| tr A0A329VG55 A0A329VG55_9GAMM  | VDRATKEA             | LLDAIVLANQI          |
| tr Q7N288 FADJ_PHOLL            | VDRATKEA             | LLDAIVLANQI          |
| tr A0A6L9JMX5 A0A6L9JMX5_9PHOLM | VDRATKEA             | LLDAIVLANQI          |
| tr A0A7X5HQ29 A0A7X5HQ29_9PHOLM | VDRATKEA             | LLDAIVLANQI          |
| tr A0A1C0U051 A0A1C0U051_9GAMM  | VDRATKEA             | LLDAIVLANQI          |
| tr A0A7X5QF62 A0A7X5QF62_9GAMM  | VDRATKEA             | LLDAIVLANQI          |

|                                 |           |                 |   |
|---------------------------------|-----------|-----------------|---|
| tr A0A2D0KWM9 A0A2D0KWM9_9GAMM  | VDDAVPLDI | LLDVAVQYVKK     |   |
| tr A0A2D0LAI1 A0A2D0LAI1_9GAMM  | VDDAVPLDI | LLDVAVQYVKK     |   |
| tr A0A2D0IXC8 A0A2D0IXC8_XENBU  | VDDAVPLDI | LLNVAVQYVKK     |   |
| tr W1JAM5 W1JAM5_9GAMM          | VDDAVPLDI | LLDVAVQYVKK     |   |
| tr A0A3D9UED3 A0A3D9UED3_9GAMM  | VDDAVPLDI | LLDVAVQYVKK     |   |
| tr A0A1I3JCA9 A0A1I3JCA9_9GAMM  | VDDAVPLDI | LLDVAVQYVKK     |   |
| tr A0A068QUL9 A0A068QUL9_9GAMM  | VDDAVPLDI | LLDVAVQYIKKG    | N |
| tr A0A0M0TCH6 A0A0M0TCH6_9GAMM  | VDDAVPLDI | LLDVAVQYVKK     |   |
| tr A0A1Q5U854 A0A1Q5U854_9GAMM  | VDEAVPLDI | LLDVAVQYVKK     |   |
| tr A0A2D0ISP1 A0A2D0ISP1_9GAMM  | VDEAVPLDI | LLDVAVQYVKK     |   |
| tr A0A1Q5TUI8 A0A1Q5TUI8_9GAMM  | VDDAVPLDI | LLDVAVQYVKK     |   |
| tr A0A2D0KJI7 A0A2D0KJI7_9GAMM  | VDDAVPLDI | LLDVAVQYVKK     |   |
| tr A0A1Y2SB97 A0A1Y2SB97_9GAMM  | VDDAVPLDI | LLDVAVQYVKK     |   |
| tr A0A1I5DWI7 A0A1I5DWI7_9GAMM  | VDDAVPLDI | LLDVAVQYVKK     |   |
| tr A0A1I7GWY6 A0A1I7GWY6_9GAMM  | VDDAVPLDI | LLDVAVQYAKK     |   |
| tr D3VKY8 D3VKY8_XENNA          | VDDAVPLEI | LLDVAVQYAKK     |   |
| tr A0A2G0Q6Q9 A0A2G0Q6Q9_9GAMM  | VDDAVPLDI | LLDVAVQYVKK     |   |
| tr A0A2D0JU24 A0A2D0JU24_9GAMM  | VDDAVPLDI | LLDVAVQYVKK     |   |
| tr A0A0J5FN38 A0A0J5FN38_9GAMM  | VDDAVPLDI | LLDVAVQYVKK     |   |
| tr A0A432XLD4 A0A432XLD4_9GAMM  | VDDVVPASI | LLDAATIELALKS   |   |
| tr A0A2D8HU84 A0A2D8HU84_9GAMM  | VAEVPQSI  | LLDVAVEHALK     | R |
| tr A0A656X1Q2 A0A656X1Q2_9GAMM  | VAEVPQSI  | LLDVAVEHALK     | R |
| tr A0A4Q1QH79 A0A4Q1QH79_9GAMM  | VEVVPQSI  | LLDVAVEHALK     | R |
| tr A0A1G7LQE6 A0A1G7LQE6_9GAMM  | VEVVPQSI  | LLDVAVEHALK     | R |
| tr A0A432YVG7 A0A432YVG7_9GAMM  | VDVVPQSI  | LLDVAVEHALK     | R |
| tr A0A1J5N0P5 A0A1J5N0P5_9GAMM  | VSEVPPVI  | LLDVALKLAAP     |   |
| tr A0A0D8D548 A0A0D8D548_9GAMM  | VNDVVPESI | LIRTAEMALA      | G |
| tr A0A3E0TMM2 A0A3E0TMM2_9GAMM  | VDDVVPNTI | LLETAELKLAG     |   |
| tr A0A3E0UD67 A0A3E0UD67_9GAMM  | VDDVVPNTI | LVATAEKLALAG    |   |
| tr A0A3E0U0P4 A0A3E0U0P4_9GAMM  | VDDVVPNTI | LVATAEKLALAG    |   |
| tr A0A0M2V8B1 A0A0M2V8B1_9GAMM  | VDEVVPVSI | LLEAAVKRALQ     | G |
| tr A0A285ITY5 A0A285ITY5_9GAMM  | VDDVVPATI | LLDAAVKRALQ     | G |
| tr A0A486XTB9 A0A486XTB9_9GAMM  | VDEVVPQSI | LLEAAVKRALK     |   |
| tr I1E1G1 I1E1G1_9GAMM          | VDEVVPNSI | LLDAAVKLALK     | G |
| tr A0A1H6KJ68 A0A1H6KJ68_9GAMM  | VDEVVANSI | LLDAAVKRALK     | G |
| tr A0A0X3Y764 A0A0X3Y764_9GAMM  | VDEVVANSI | LLEAAVKRALK     | G |
| tr A0A2N1YEV4 A0A2N1YEV4_9GAMM  | VDEVVANSI | LLEAAVKRALK     | G |
| tr A0A3P3QCM3 A0A3P3QCM3_9GAMM  | VDVVPKSI  | LLEAAVQLALKG    |   |
| tr F7NT72 F7NT72_9GAMM          | VDVVPKSI  | LLEAAVQLALKG    |   |
| tr A0A3S2TW63 A0A3S2TW63_9GAMM  | VDVVPKSI  | LLEAAVQLALKG    |   |
| tr A0A3D5BGW7 A0A3D5BGW7_9GAMM  | VDVVPKSI  | LLEAAVKMALA     | G |
| tr A0A5C7TI17 A0A5C7TI17_9GAMM  | VDVVPKSI  | LLEAAVKMALA     | G |
| tr A0A0U4W982 A0A0U4W982_9GAMM  | VDVVPKSI  | LLEAAVKMALA     | G |
| tr A0A2I0FCM2 A0A2I0FCM2_9GAMM  | VDEVVPETV | LLEAVKLAACK     |   |
| tr A0A2G2IVL1 A0A2G2IVL1_9GAMM  | VDEVVPETV | LLEAVKLAACK     |   |
| tr A6FI21 A6FI21_9GAMM          | VDEVVPETV | LLEAVKLAACK     |   |
| tr A0A4U1BNR2 A0A4U1BNR2_9GAMM  | ADEMVPNTV | LIEVAKKHLAKG    | K |
| tr E1SQ60 E1SQ60_FERBD          | VEETVPLSV | LVDVAREYALK     | G |
| tr A0A4Y6IZ09 A0A4Y6IZ09_9GAMM  | VDDVVPESI | LLQTAVEMALAG    |   |
| tr A0A0C3QSZ7 A0A0C3QSZ7_9GAMM  | VDDVVPESI | LLQTAVEMALAG    |   |
| tr A0A6L7HXW0 A0A6L7HXW0_9GAMM  | VDDVVPESI | LLQTAVEMALAG    |   |
| sp A3QFP3 FADJ_SHELP            | VDDVVPESI | LLQTAVEMALAG    |   |
| tr A0A1E5IXH7 A0A1E5IXH7_SHECO  | VNDVVPESI | LLRTAIELMALSG   |   |
| tr A0A411PKQ0 A0A411PKQ0_9GAMM  | VDDMVPDSI | LLEAAIKLAKKG    |   |
| tr A0A6G9QKM3 A0A6G9QKM3_9GAMM  | VNDVVPNTI | LLETAIELAKKG    |   |
| tr A0A6P1UL63 A0A6P1UL63_9GAMM  | VNDVVPNSI | LLETAIELAKKS    |   |
| tr A0A2N1ERI9 A0A2N1ERI9_9GAMM  | VNDVVPNSI | LLETAIELAKKS    |   |
| tr A0A7W4FU55 A0A7W4FU55_9GAMM  | VNDVVPNSI | LLETAIELAKKS    |   |
| sp Q8ECP7 FADJ_SHEON            | VNDVVPQTI | LLQTAVEMALAG    |   |
| tr A0A501XZY8 A0A501XZY8_9GAMM  | VNDVVPQTI | LLQTAVEMALAG    |   |
| tr A0A2W5DCZ0 A0A2W5DCZ0_SHEOE  | VNDVVPQTI | LLQTAVEMALAG    |   |
| tr A0A1E3V3C8 A0A1E3V3C8_9GAMM  | VNDVVPQTI | LLQTAVEMALAG    |   |
| tr A0A1Z4AI20 A0A1Z4AI20_9GAMM  | VNDVVPQTI | LLQTAVEMALAG    |   |
| tr A0A7X9LJL9 A0A7X9LJL9_9GAMM  | VNDVVPQTI | LLQTAVEMALAG    |   |
| tr A0A073KMY5 A0A073KMY5_9GAMM  | VNDVVPQTI | LLQTAVEMALAG    |   |
| sp A0KV76 FADJ_SHEA             | VNDVVPQTI | LLQTAVEMALAG    |   |
| tr A0A220UTH7 A0A220UTH7_9GAMM  | VNDVVPQTI | LLQTAVEMALAG    |   |
| tr A0A5B8R6W1 A0A5B8R6W1_9GAMM  | VNDVVPQTI | LLQTAVEMALAG    |   |
| tr V1DAI4 V1DAI4_9GAMM          | VNDVVPQTI | LLQTAVEMALAG    |   |
| tr A0A448CPQ4 A0A448CPQ4_SHEPU  | VNDVVPQTI | LLQTAVEMALAG    |   |
| tr A0A252ERQ3 A0A252ERQ3_SHEPU  | VNDVVPQTI | LLQTAVEMALAG    |   |
| sp Q0HKD1 FADJ_SHEM             | VNDVVPQTI | LLQTAVEMALAG    |   |
| sp Q0HWN3 FADJ_SHESR            | VNDVVPQTI | LLQTAVEMALAG    |   |
| tr F7RQE3 F7RQE3_9GAMM          | VNDVVPQTI | LLQTAVEMALAG    |   |
| tr B8EE98 B8EE98_SHEB2          | VNDVVPQTI | LLQTAVEMALAG    |   |
| sp A6WQ25 FADJ_SHEB8            | VNDVVPQTI | LLQTAVEMALAG    |   |
| tr A0A448EK41 A0A448EK41_9GAMM  | VNDVVPQTI | LLQTAVEMALAG    |   |
| tr A0A553JHX1 A0A553JHX1_SHEHA  | VDDMVPDSI | LLQTAVEMALKG    |   |
| tr B8CPY6 B8CPY6_SHEFW          | VDDAVPESI | LMRTAEMALAG     |   |
| tr A0A431WFC4 A0A431WFC4_9GAMM  | VDDAVPESI | LLETAIVEMALKG   |   |
| tr A8FTR7 A8FTR7_SHESH          | VDDVVPESI | LLETAIVEMALKG   |   |
| tr A0A431WNL0 A0A431WNL0_9GAMM  | VDDVVPESI | LLETAIVEMALKG   |   |
| tr A0A550AEC5 A0A550AEC5_9GAMM  | VDEVPQSI  | LLTTAVEMALKG    |   |
| tr A0A7L4WW90 A0A7L4WW90_9GAMM  | VDEVPQSI  | LLTTAVEMALKG    |   |
| tr A9DDU3 A9DDU3_9GAMM          | VDDVVPESI | LLATAVKMALKG    |   |
| tr A0A330M2B9 A0A330M2B9_9GAMM  | VDDVVPESI | LLATAVKMALKG    |   |
| tr A0A5N8UFC7 A0A5N8UFC7_9GAMM  | VDDVVPESI | LLATAVKMALKG    |   |
| tr A0A1S6HN57 A0A1S6HN57_9GAMM  | VDDVVPESI | LLATAVKMALKG    |   |
| tr D4ZMH7 D4ZMH7_SHEVD          | VDDVVPESI | LLATAVKMALKG    |   |
| tr A0A3L8Q213 A0A3L8Q213_9GAMM  | VNDMVPQSI | LLESAINLAKS     | G |
| tr A0A3A6U4N9 A0A3A6U4N9_9GAMM  | VSEVVPKTI | LLEAAIKLAKKG    |   |
| tr A0A4Q5MA37 A0A4Q5MA37_9GAMM  | VHDVVPNSI | LLDAATIELAKGG   |   |
| tr A0A1L6LSX5 A0A1L6LSX5_9DELTA | ADEVVHVS  | LHEVAAQHALKL    | A |
| tr A0A2W4L9B9 A0A2W4L9B9_9PROT  | VDEAVPEPL | LLQVAREARAL     | G |
| tr A0A2W4M4E6 A0A2W4M4E6_9PROT  | VDEVVPAPV | LESAAIERALMLLAP |   |
| tr A0A6I2GRX9 A0A6I2GRX9_9DELTA | VDEVVPAPV | LRAVALQRAEL     |   |
| tr A0A0H4WMK2 A0A0H4WMK2_9DELTA | VDEVVPAPV | LRAIVARRAKEL    |   |
| tr F8CJ36 F8CJ36_MYXFH          | VDEVVPAPV | LRAIVARRAKEL    |   |
| tr A0A250K0F1 A0A250K0F1_9DELTA | VDEVVPAPV | LRAIVARRAKEL    |   |
| tr A0A7Y6WFZ2 A0A7Y6WFZ2_9DELTA | VDEVVPAPV | LRAIVARRAKEL    |   |
| tr A0A7Y7C660 A0A7Y7C660_9DELTA | VDEVVPAPV | LRAIVARRAKEL    |   |
| tr A0A7Y4JFH2 A0A7Y4JFH2_MYXXA  | VDEVVPAPV | LRAIVARRAKEL    |   |
| tr A0A4Y6CZQ9 A0A4Y6CZQ9_MYXXA  | VDEVVPAPV | LRAIVARRAKEL    |   |

|               |                  |            |               |                       |
|---------------|------------------|------------|---------------|-----------------------|
| tr A0A7Y4IKV5 | A0A7Y4IKV5_MYXXA | VDEVVPAPI  | LRAI AVRAKEL  | AEGTLKVDRRHGGQFKGVAA  |
| tr A0A511HHB0 | A0A511HHB0_9DELT | VDEVVPAPI  | LRAI AVRAKEL  | AEGTLKVDRRHGGQFKGVAA  |
| tr A0A4Y6CKY7 | A0A4Y6CKY7_MYXXA | VDEVVPAPI  | LRAI AVRAKEL  | AEGTLKVDRRHGGQFKGVAA  |
| tr Q1D1F2     | Q1D1F2_MYXXD     | VDEVVPPTPI | LRAI AVLRAKEL | ADGKLVDRRHGGQFKGVAA   |
| tr A0A7Y4MA14 | A0A7Y4MA14_MYXXA | VDEVVPPTPI | LRAI AVLRAKEL | ADGKLVDRRHGGQFKGVAA   |
| tr A0A7T8Y4N9 | A0A7T8Y4N9_MYXXA | VDEVVPAPI  | LRAI AVRAKEL  | AEGTLKVDRRHGGQFKGVAA  |
| tr L7UE67     | L7UE67_MYXSD     | VDEVVPPTPI | LRAVALQRAEL   | AEGSLKPERTRGQGLT      |
| tr A0A511T9X1 | A0A511T9X1_MYXFU | VDEVVPVPI  | LRAI AVQRAKEL | AAGSLKPVRAHGGQLKS     |
| tr A0A7Y7C9C4 | A0A7Y7C9C4_9DELT | VDEVVPPTPI | LRAVALQRAEL   | AEGTLKPERTHGGQFKAV    |
| tr A0A540X7W8 | A0A540X7W8_9DELT | VDEVVPPTPI | LRAI ALQRAEL  | AAGTLTPERAHGGQFKAV    |
| tr A0A3A5FK19 | A0A3A5FK19_9DELT | VDEVVPVPL  | LRSLALQRAEL   | AAGTLKVTRAHGGQFKAVAS  |
| tr A0A3A8JQL9 | A0A3A8JQL9_9DELT | VDEVVPVPM  | LKDIALKRAEEL  | AAGTLKVERAHGGQFKAVAQ  |
| tr A0A7Y4NFA4 | A0A7Y4NFA4_9DELT | VDEVVPVPM  | LKDIALKRAEEL  | AAGTLKVERAH.QGFKAVAQ  |
| tr A0A3A8HDQ7 | A0A3A8HDQ7_9DELT | VDEVVPVPM  | LKDIALKRAEEL  | AAGTLKVERAH.QGFKAVAQ  |
| tr A0A3A8GR90 | A0A3A8GR90_9DELT | VDEVVPVPM  | LKDIALKRAEEL  | AAGTLKVERAH.QGFKAVAQ  |
| tr A0A3A8SBD7 | A0A3A8SBD7_9DELT | VDEVVPVPM  | LKDIALKRAEEL  | AAGTLKVERSHGGQFKAVAQ  |
| tr A0A3A8T0I8 | A0A3A8T0I8_9DELT | VDEVVPVPM  | LKDIALKRAEEL  | AAGTLKVERSHGGQFKAVAQ  |
| tr A0A7X5BU07 | A0A7X5BU07_9DELT | VDEVVPVPM  | LKDIALKRAEEL  | AAGTLKVERSHGGQFKAVAQ  |
| tr A0A7Y1RVL2 | A0A7Y1RVL2_9DELT | VDEVVPVPM  | LKDIALKRAEEL  | AAGTLKVERSHGGQFKAVAQ  |
| tr A0A3A8THN2 | A0A3A8THN2_9DELT | VDEVVPVPM  | LKDIALKRAEEL  | AAGTLKVERSHGGQFKAVAQ  |
| tr A0A7Y1RX76 | A0A7Y1RX76_9DELT | VDEVVPVPM  | LKDIALKRAEEL  | AAGTLKVERSHGGQFKAVAQ  |
| tr A0A3A8RA58 | A0A3A8RA58_9DELT | VDEVVPVPM  | LKDIALKRAEEL  | AAGTLKVERSHGGQFKAVAQ  |
| tr A0A410RPB6 | A0A410RPB6_CORCK | VDEVVPVPM  | LKDIALKRAEEL  | AAGTLKVERSHGGQFKAVAQ  |
| tr A0A7Y4J474 | A0A7Y4J474_CORCK | VDEVVPVPM  | LKDIALKRAEEL  | AAGTLKVERSHGGQFKAVAQ  |
| tr A0A3A8I9Z6 | A0A3A8I9Z6_9DELT | VDEVVPVPM  | LKDIALKRAEEL  | AAGTLKVERSHGGQFKAVAQ  |
| tr H8MKE9     | H8MKE9_CORCM     | VDEVVPVPM  | LKDIALKRAVEL  | AAGTLKVERSHGGQFKAVAQ  |
| tr A0A3A8H102 | A0A3A8H102_9DELT | VDEVVPVPM  | LKDIALKRAEEL  | AAGTLKVERSHGGQFKAVAQ  |
| tr A0A554FW33 | A0A554FW33_9DELT | VDEVVPVPM  | LKDIALKRAEEL  | AAGTLKVERAHGGQFKAVAQ  |
| tr A0A3A8NPC0 | A0A3A8NPC0_9DELT | VDEVVPVPM  | LKALAVRRAEEL  | AAGTLKVERAHGGQFKAVAQ  |
| tr A0A3A8JUV3 | A0A3A8JUV3_9DELT | VDEVVPVPM  | LKALAVRRAEEL  | AAGTLKVERAHGGQFKAVAQ  |
| tr A0A3A8NEX6 | A0A3A8NEX6_9DELT | VDEVVPVPM  | LKALAVRRAEEL  | AAGTLKVERAH.QGFKAVAQ  |
| tr A0A3A8JEU8 | A0A3A8JEU8_9DELT | VDEVVPVPM  | LKRIALQRAEEL  | AAGTLKVERAHGGQFKAVAA  |
| tr A0A3A8LI76 | A0A3A8LI76_9DELT | VDEVVPVPM  | LKRIALQRAEEL  | AAGTLKVERAH.QGFKAVAA  |
| tr A0A085WXN8 | A0A085WXN8_9DELT | VDEVVPVPI  | LRSLALQRAEL   | SAGALKVERPHGQRLKAVAA  |
| tr A0A2T4VOM5 | A0A2T4VOM5_9DELT | VDEVVPAPI  | LRAVALQRAEL   | AEGMLKVERSRGGQGLKAVAA |
| tr A0A0G2ZSW5 | A0A0G2ZSW5_9DELT | VDEVVPAPI  | LRTLAVRRAREL  | AEG.LKVERPRGQGLKAVAQ  |
| tr A0A3M2DKY0 | A0A3M2DKY0_9DELT | VDDVVPPEPI | LVDVAIDMARAL  | AD                    |
| tr A0A661NQ58 | A0A661NQ58_9DELT | VDEVVPNAI  | LLDVAIETAQKL  | AGREAG                |
| tr A0A520YD99 | A0A520YD99_9DELT | VDVVPPSI   | LLETAALALER   |                       |
| tr A0A7Y3BRE4 | A0A7Y3BRE4_9DELT | VDVVPPSI   | LLETAALALE    | R                     |
| tr A0A2D9TF90 | A0A2D9TF90_9DELT | VDEVVPSI   | LVDVAQAQHAVRL |                       |
| tr A0A2E0TP32 | A0A2E0TP32_9DELT | VDEVVPSAI  | VVEVAKHAKKY   | A                     |
| tr A0A2E4Y3V1 | A0A2E4Y3V1_9PROT | VDDVVCPEI  | LEAVAVQAQKL   | V                     |
| tr A0A2E6VRH4 | A0A2E6VRH4_9DELT | VDTVVSPIG  | LKHVAIQAAQKL  | V                     |
| tr A0A1F9FB59 | A0A1F9FB59_9DELT | VDVTVPYG   | LEDAVTTCKRL   | IMG                   |





tr|A0A2D0KWM9|A0A2D0KWM9\_9GAMM ...GV...AKR...K...P...LA...WSQR...L...ASALGRPLLF...RMVQQKT
tr|A0A2D0LAI1|A0A2D0LAI1\_9GAMM ...GV...AKR...K...P...LA...WSQR...L...ASALGRPLLF...RMVQQKT
tr|A0A2D0IXC8|A0A2D0IXC8\_XENBU ...GI...IKR...K...P...LA...WSQR...L...ASALGRPLLF...RMVQQKT
tr|W1JAM5|W1JAM5\_9GAMM ...GI...IKR...K...P...LA...WSQR...L...ASALGRPLLF...QMVQQKT
tr|A0A3D9UED3|A0A3D9UED3\_9GAMM ...GI...IKR...K...P...LA...WSQR...L...ASALGRPLLF...QMVQQKT
tr|A0A1I3JCA9|A0A1I3JCA9\_9GAMM ...GA...VKKR...K...P...IA...WSQR...L...ASALGRPLLF...HVMVHKT
tr|A0A068QUL9|A0A068QUL9\_9GAMM VKKGI...VKKR...K...P...LA...WSQR...L...ASTLGRPLLF...SMVHOKT
tr|A0A0M0TCH6|A0A0M0TCH6\_9GAMM ...GI...VKKR...K...P...LV...WSQR...L...ASALGRPLLF...QMVHKKT
tr|A0A1Q5U854|A0A1Q5U854\_9GAMM ...GI...VKKR...K...P...LA...WSQR...L...ASALGRPLLF...QMVHKKT
tr|A0A2D0ISP1|A0A2D0ISP1\_9GAMM ...GI...VKKR...K...P...LA...WSQR...L...ASALGRPLLF...QMVHKKT
tr|A0A1Q5TUI8|A0A1Q5TUI8\_9GAMM ...GS...VKKR...K...P...LA...WSQR...L...ASALGRPLLF...QMVHKKT
tr|A0A2D0KJI7|A0A2D0KJI7\_9GAMM ...GI...VKKR...K...P...LA...WSQR...L...ASTLGRPLLF...HVMVHKT
tr|A0A1Y2SB97|A0A1Y2SB97\_9GAMM ...GT...VKKR...K...P...LA...WPQR...L...ASPLSRPLLF...RMVHKKT
tr|A0A1I5DWI7|A0A1I5DWI7\_9GAMM ...GT...VKKR...K...P...LA...WSQR...L...ASPLSRPLLF...QMVHKKT
tr|A0A1I7GWY6|A0A1I7GWY6\_9GAMM ...GI...IKR...K...P...LA...WSQR...M...ASALGRPLLF...HVMHOKT
tr|D3VKY8|D3VKY8\_XENNA ...GI...IKR...K...P...LA...WSQR...M...ASALGRPLLF...HVMHOKT
tr|A0A2G0Q6Q9|A0A2G0Q6Q9\_9GAMM ...GV...VKKR...K...P...LA...WSQR...L...ASALGRPLLF...RMVHOKT
tr|A0A2D0JU24|A0A2D0JU24\_9GAMM ...GI...AKR...K...P...LA...WSQR...L...ASALGRPLLF...HTVHOKT
tr|A0A0J5FN38|A0A0J5FN38\_9GAMM ...GI...AKR...K...P...LA...WSQR...L...ASALGRPLLF...HTVHOKT
tr|A0A432XLD4|A0A432XLD4\_9GAMM ...KA...KVR...K...P...VQ...HS...TLNK...M...LEGT...G...VGR...L...IF...SKAREQA
tr|A0A2D8HU84|A0A2D8HU84\_9GAMM K...PK...ST...K...P...PP...LK...GMSK...V...LEA...TRF...GRD...IF...KKAGEQA
tr|A0A656X1Q2|A0A656X1Q2\_9GAMM K...PK...ST...K...P...PP...LK...GMSK...V...LEA...TRF...GRD...IF...KKAGEQA
tr|A0A4Q1QH79|A0A4Q1QH79\_9GAMM K...PK...AS...K...P...PP...LK...GFSK...L...EAT...KF...GRD...IF...KKAGEQA
tr|A0A1G7LQE6|A0A1G7LQE6\_9GAMM K...PK...AS...K...P...AP...LK...GFSK...L...EAT...KF...GRD...IF...KKAGEQA
tr|A0A432YVG7|A0A432YVG7\_9GAMM K...PK...AS...K...P...AP...LK...GFSK...L...EAT...KF...GRD...IF...KKAGEQA
tr|A0A1J5N0P5|A0A1J5N0P5\_9GAMM ...IK...KT...K...P...K...LD...NVNA...L...QAT...S...AGR...N...IF...SQAQKSV
tr|A0A0D8D548|A0A0D8D548\_9GAMM K...VK...AK...P...K...MS...VMDK...L...E...G...N...S...F...GR...N...IF...KQAQKTV
tr|A0A3E0TNM2|A0A3E0TNM2\_9GAMM ...KV...KAK...K...P...LK...RS...LVDN...L...E...G...N...S...F...GR...N...IF...DQASKSV
tr|A0A3E0UD67|A0A3E0UD67\_9GAMM ...KV...KAK...K...P...LK...RS...LMDK...L...E...G...N...S...F...GR...N...IF...DQASKSV
tr|A0A3E0U0P4|A0A3E0U0P4\_9GAMM ...KV...KAK...Q...P...LK...RS...LMDK...L...E...G...N...S...F...GR...N...IF...DQASKSV
tr|A0A0M2V8B1|A0A0M2V8B1\_9GAMM K...TK...AA...A...K...D...KG...LLAK...L...E...N...T...P...GR...N...IF...SQAQKOT
tr|A0A285ITY5|A0A285ITY5\_9GAMM K...AK...SVS...K...P...DK...GI...L...VAK...L...E...N...T...P...GR...N...IF...SQAQKOT
tr|A0A486XTB9|A0A486XTB9\_9GAMM ...GK...PQR...SA...K...P...VK...LN...LVGK...L...E...R...T...S...F...GR...N...IF...NQAQKOT
tr|I1E1G1|I1E1G1\_9GAMM K...PK...RE...P...P...VK...LN...LVGK...L...E...R...T...P...F...GR...N...IF...SQAQKOT
tr|A0A1H6KJ68|A0A1H6KJ68\_9GAMM K...LE...REQ...P...K...LN...LVGK...L...E...R...T...P...F...GR...N...IF...SQAQKOT
tr|A0A0X3Y764|A0A0X3Y764\_9GAMM K...PQ...REQ...P...K...LN...LVGK...L...E...R...T...P...F...GR...N...IF...SQAQKOT
tr|A0A2N1YEV4|A0A2N1YEV4\_9GAMM K...PQ...REQ...P...K...LN...LVGK...L...E...R...T...P...F...GR...N...IF...SQAQKOT
tr|A0A3P3QCM3|A0A3P3QCM3\_9GAMM ...KP...AAR...D...K...P...VK...LN...FVGK...L...E...K...T...P...F...GR...A...I...V...S...QAQKOT
tr|F7NT72|F7NT72\_9GAMM ...KP...AAR...D...K...P...VK...LN...FVGK...L...E...K...T...P...F...GR...A...I...V...S...QAQKOT
tr|A0A3S2TW63|A0A3S2TW63\_9GAMM ...KP...AAR...E...K...P...VK...LN...FVGK...L...E...K...T...P...F...GR...A...V...S...QAQKOT
tr|A0A3D5BGW7|A0A3D5BGW7\_9GAMM K...PD...RSK...A...K...P...VK...LP...FVGK...L...E...F...T...S...I...GR...L...IF...SQAQKOT
tr|A0A5C7TI17|A0A5C7TI17\_9GAMM K...PD...RSK...P...K...P...VK...LP...LVGK...L...E...F...T...S...I...GR...L...IF...SQAQKOT
tr|A0A0U4W982|A0A0U4W982\_9GAMM K...PD...RSK...P...K...P...VK...LP...LVGK...L...E...F...T...S...I...GR...L...IF...SQAQKOT
tr|A0A2I0FCM2|A0A2I0FCM2\_9GAMM ...GK...IER...K...K...P...LK...RD...LTSK...L...E...T...N...K...F...GR...N...IF...DQAKKOT
tr|A0A2G2IVL1|A0A2G2IVL1\_9GAMM ...GK...IQR...K...K...P...LK...RD...LTSK...L...E...T...N...K...F...GR...N...IF...DQAKKOT
tr|A6FT21|A6FT21\_9GAMM ...GK...IQR...K...K...P...LK...RD...LTSK...L...E...T...N...K...F...GR...N...IF...DQAKKOT
tr|A0A4U1BNR2|A0A4U1BNR2\_9GAMM R...GK...VAP...K...K...P...K...LK...GAEK...L...E...A...T...S...AGR...N...IF...YKQALKTV
tr|E1SQ60|E1SQ60\_FERBD K...RK...AV...K...K...P...PN...LK...GAEK...L...E...S...T...AF...GR...K...V...IF...DQAGKQV
tr|A0A4Y6IZ09|A0A4Y6IZ09\_9GAMM ...AR...PAK...K...K...P...RK...VS...LVEK...L...E...G...T...P...V...GR...N...IF...DQALKQV
tr|A0A0C3QSZ7|A0A0C3QSZ7\_9GAMM ...AR...PAK...K...K...P...RK...VP...MVEK...L...E...G...T...P...V...GR...N...IF...DQALKQV
tr|A0A6L7HXW0|A0A6L7HXW0\_9GAMM ...AR...PVK...K...K...P...PK...LS...TVEK...L...E...G...T...P...V...GR...N...IF...DQALKQV
tr|A3QFP3|FADJ\_SHELP ...AR...PAK...K...K...P...PK...LS...TVEK...L...E...G...T...P...V...GR...N...IF...DQALKQV
tr|A0A1E5IXH7|A0A1E5IXH7\_SHECO ...KK...MPK...K...K...P...AK...AS...MVNR...L...E...G...T...S...AGR...N...IF...DQALKQV
tr|A0A411PKQ0|A0A411PKQ0\_9GAMM ...KK...AAN...K...K...P...VK...PT...LVNK...L...E...S...T...S...F...TR...D...V...IF...DQAGKQV
tr|A0A6G9QKM3|A0A6G9QKM3\_9GAMM ...KS...AAK...P...K...P...VK...KS...ALNK...L...E...S...T...S...F...TR...D...V...IF...DQAGKQV
tr|A0A6P1UL63|A0A6P1UL63\_9GAMM ...KQ...AAK...P...K...P...VV...QS...KINQ...L...E...S...T...S...F...TR...D...V...IF...DQAGKQV
tr|A0A2N1ERI9|A0A2N1ERI9\_9GAMM ...KQ...AAK...P...K...P...VV...QS...KINQ...L...E...S...T...S...F...TR...D...V...IF...DQAGKQV
tr|A0A7W4FU55|A0A7W4FU55\_9GAMM ...KQ...AAK...P...K...P...VV...QS...KLNQ...L...E...S...T...S...F...TR...D...V...IF...DQAGKQV
tr|Q8ECP7|FADJ\_SHEON ...KQ...IAK...P...K...P...VK...KS...LVNQ...L...E...G...T...G...F...GR...N...IF...DQAAKQV
tr|A0A501XZY8|A0A501XZY8\_9GAMM ...KK...TAK...P...K...P...VK...KS...LVNQ...L...E...G...T...G...F...GR...N...IF...DQAAKQV
tr|A0A2W5DCZ0|A0A2W5DCZ0\_SHEOE ...KK...TAK...P...K...P...VK...KS...LVNQ...L...E...G...T...G...F...GR...N...IF...DQAAKQV
tr|A0A1E3V3C8|A0A1E3V3C8\_9GAMM ...KK...TAK...P...K...P...VK...KS...LVNQ...L...E...G...T...G...F...GR...N...IF...DQAAKQV
tr|A0A1Z4AI20|A0A1Z4AI20\_9GAMM ...KK...TAK...P...K...P...VK...KS...LVNQ...L...E...G...T...G...F...GR...N...IF...DQAAKQV
tr|A0A7X9LJL9|A0A7X9LJL9\_9GAMM ...KK...TAK...P...K...P...VK...KS...LVNQ...L...E...G...T...G...F...GR...N...IF...DQAAKQV
tr|A0A073KMY5|A0A073KMY5\_9GAMM ...KK...TAK...P...K...P...VK...KS...LVNQ...L...E...G...T...G...F...GR...N...IF...DQAAKQV
tr|A0KV76|FADJ\_SHEA ...KR...TAK...P...K...P...VK...KS...LVNQ...L...E...G...T...G...F...GR...N...IF...DQAAKQV
tr|A0A220UTH7|A0A220UTH7\_9GAMM ...KR...TAK...P...K...P...VK...KS...LVNQ...L...E...G...T...G...F...GR...N...IF...DQAAKQV
tr|A0A5B8R6W1|A0A5B8R6W1\_9GAMM ...KR...TAK...P...K...P...VK...KS...LVNQ...L...E...G...T...G...F...GR...N...IF...DQAAKQV
tr|V1DAI4|V1DAI4\_9GAMM ...KR...TAK...P...K...P...VK...KS...LVNQ...L...E...G...T...G...F...GR...N...IF...DQAIKQV
tr|A0A448CPQ4|A0A448CPQ4\_SHEPU ...KR...TAK...P...K...P...VK...KS...LVNQ...L...E...G...T...G...F...GR...N...IF...DQAAKQV
tr|A0A252ERQ3|A0A252ERQ3\_SHEPU ...KR...TAK...P...K...P...VK...KS...LVNQ...L...E...G...T...G...F...GR...N...IF...DQAAKQV
tr|Q0HKD1|FADJ\_SHESM ...KR...TAK...P...K...P...VK...KS...LVNQ...L...E...G...T...G...F...GR...N...IF...DQAAKQV
tr|Q0HWN3|FADJ\_SHESR ...KR...TAK...P...K...P...VK...KS...LVNQ...L...E...G...T...G...F...GR...N...IF...DQAAKQV
tr|F7RQE3|F7RQE3\_9GAMM ...KR...ASK...P...K...P...IK...KS...LVNQ...L...E...G...T...S...F...GR...N...IF...DQATKQV
tr|B8EE98|B8EE98\_SHEB2 ...KR...APK...P...K...P...VK...KS...LVNQ...L...E...G...T...S...F...GR...N...IF...DQATKQV
tr|A6WQ25|FADJ\_SHEB8 ...KR...APK...P...K...P...VK...KS...LVNQ...L...E...G...T...S...F...GR...N...IF...DQATKQV
tr|A0A448EK41|A0A448EK41\_9GAMM ...KR...APK...P...K...P...VK...KS...LVNQ...L...E...G...T...S...F...GR...N...IF...DQATKQV
tr|A0A553JHX1|A0A553JHX1\_SHEHA ...KR...APK...K...K...P...PK...LS...LVNR...L...E...G...S...N...I...GR...N...IF...DQAGKQV
tr|B8CPY6|B8CPY6\_SHEFW ...KR...TAK...K...K...P...KK...QS...FINK...M...L...E...G...T...S...AGR...N...IF...DQAGKQV
tr|A0A431WFC4|A0A431WFC4\_9GAMM ...KR...APK...K...K...P...VK...KS...LVTR...L...E...G...T...P...P...GR...N...IF...DQAGKQV
tr|A8FTR7|A8FTR7\_SHESH ...KR...APK...K...K...P...VK...KS...LVTR...L...E...G...T...P...P...GR...N...IF...DQAGKQV
tr|A0A431WNL0|A0A431WNL0\_9GAMM ...KR...APK...K...K...P...VK...KS...LVTR...L...E...G...T...P...P...GR...N...IF...DQAGKQV
tr|A0A550AEC5|A0A550AEC5\_9GAMM ...KR...TAK...K...K...P...VK...KS...LVNK...L...E...G...T...P...V...GR...N...IF...DQASKQV
tr|A0A7L4WW90|A0A7L4WW90\_9GAMM ...KR...TAK...K...K...P...VK...KS...LVNK...L...E...G...T...P...V...GR...N...IF...DQASKQV
tr|A9DDU3|A9DDU3\_9GAMM ...KR...VAK...K...K...P...VK...KS...LVNK...L...E...G...T...S...F...GR...N...IF...DQAGKQV
tr|A0A330M2B9|A0A330M2B9\_9GAMM ...KR...VPK...K...K...P...VK...KS...LVNK...L...E...G...T...S...F...GR...N...IF...DQAGKQV
tr|A0A5N8UFC7|A0A5N8UFC7\_9GAMM ...KR...APK...K...K...P...VN...KS...LVNK...L...E...G...T...S...F...GR...N...IF...DQAGKQV
tr|A0A1S6HN57|A0A1S6HN57\_9GAMM ...KR...SPK...K...K...P...VK...KS...VVNK...L...E...G...T...S...V...GR...N...IF...DQAGKQV
tr|D4ZMH7|D4ZMH7\_SHEVD ...KV...APK...K...K...P...EN...KS...LVNK...L...E...G...T...A...V...GR...N...IF...DQAGKQV
tr|A0A3L8Q213|A0A3L8Q213\_9GAMM K...VA...PK...P...P...L...RK...KS...LINR...L...E...D...T...S...M...GR...N...IF...DQAAKQV
tr|A0A3A6U4N9|A0A3A6U4N9\_9GAMM ...HK...KAK...P...K...P...VK...QS...LVNR...L...E...A...T...P...I...GR...N...IF...DQATKQV
tr|A0A4Q5MA37|A0A4Q5MA37\_9GAMM ...KK...KPA...K...K...P...RK...TP...LVNK...L...E...N...S...F...GR...N...IF...DQAAKQV
tr|A0A1L6LSX5|A0A1L6LSX5\_9DELTA EKGAP...FGR...RAPKKKGAAEQ...LTTL...A...L...E...K...N...P...V...GR...L...IF...KKAREEL
tr|A0A2W4L9B9|A0A2W4L9B9\_9PROT E...GR...PPR...P...GR...G...E...G...R...P...T...A...E...L...R...E...L...A...L...E...R...N...P...I...GR...L...IF...SQAQKQA
tr|A0A2W4M4E6|A0A2W4M4E6\_9PROT ...GD...RRR...GAR...K...K...P...LDK...RA...L...Q...E...A...M...L...A...K...N...P...I...GR...K...I...V...E...SQAQKOT
tr|A0A6I2GRX9|A0A6I2GRX9\_9DELTA ...AD...GTR...VP...K...K...P...E...R...G...T...A...P...A...K...D...F...G...A...R...L...R...E...L...A...L...E...D...N...P...V...GR...L...IF...DQAAKQV
tr|A0A0H4WMK2|A0A0H4WMK2\_9DELTA G...GK...AK...K...K...P...GLAG...F...I...Q...L...A...N...K...E...L...W...A...E...V...A...L...E...D...N...P...L...GR...K...V...L...E...DQARKQL
tr|F8CJ36|F8CJ36\_MYXFH G...GK...SK...K...K...P...GLAG...F...I...Q...L...A...N...K...E...L...W...A...E...V...A...L...E...D...N...P...L...GR...K...V...L...E...DQARKQL
tr|A0A250K0F1|A0A250K0F1\_9DELTA G...GK...SK...K...K...P...GLAG...F...I...Q...L...A...N...K...E...L...W...A...E...V...A...L...E...D...N...P...L...GR...K...V...L...E...DQARKQL
tr|A0A7Y6WFZ2|A0A7Y6WFZ2\_9DELTA S...GK...AK...K...K...P...GLAG...F...I...Q...L...A...N...K...E...L...W...A...E...V...A...L...E...D...N...P...L...GR...K...V...L...E...DQARKQL
tr|A0A7Y7C660|A0A7Y7C660\_9DELTA S...GK...AK...K...K...P...GLAG...F...I...Q...L...A...N...K...E...L...W...A...E...V...A...L...E...D...N...P...L...GR...K...V...L...E...DQARKQL
tr|A0A7Y4JFH2|A0A7Y4JFH2\_MYXXA N...GK...AK...K...K...P...GLAG...F...I...Q...L...A...N...K...E...L...W...A...E...V...A...L...E...D...N...P...L...GR...K...V...L...E...DQARKQL
tr|A0A4Y6CZQ9|A0A4Y6CZQ9\_MYXXA N...GK...AK...K...K...P...GLAG...F...I...Q...L...A...N...K...E...L...W...A...E...V...A...L...E...D...N...P...L...GR...K...V...L...E...DQARKQL

tr|A0A7Y4IKV5|A0A7Y4IKV5\_MYXXA N..GK...AK..GLAGFIQGLANK..EL.....WAEV ALEDNPLGRKVLFDQARKQL  
tr|A0A511HHB0|A0A511HHB0\_9DELT N..GK...AK..GLAGFIQGLANK..EL.....WAEV ALEDNPLGRKVLFDQARKQL  
tr|A0A4Y6CKY7|A0A4Y6CKY7\_MYXXA N..GK...AK..GLAGFIQGLANK..EL.....WAEV ALEDNPLGRKVLFDQARKQL  
tr|Q1D1F2|Q1D1F2\_MYXXD N..GK...AK..GLAGFIQGLANK..EL.....WAEV ALEDNPLGRKVLFDQARKQL  
tr|A0A7Y4MA14|A0A7Y4MA14\_MYXXA N..GK...AK..GLAGFIQGLANK..EL.....WAEV ALEDNPLGRKVLFDQARKQL  
tr|A0A7T8Y4N9|A0A7T8Y4N9\_MYXXA N..GK...VK..GLAGFIQGLANK..EL.....WAEV ALEDNPLGRKVLFDQARKQL  
tr|L7UE67|L7UE67\_MYXSD ...AG...GPK..GLAGFFQGLANK..EL.....WAEV ALEDNPLGRKVLFDQARNQL  
tr|A0A511T9X1|A0A511T9X1\_MYXFU ...GG...QKK..GLAGFFQGLANK..EL.....WAEV ALEDNPLGRKVLFDQARKQL  
tr|A0A7Y7C9C4|A0A7Y7C9C4\_9DELT ...GQ...KK..GVAGFFQGLANK..EL.....WAEV ALEDNPLGRKVLFDQARKQL  
tr|A0A540X7W8|A0A540X7W8\_9DELT ...GQ...KK..GVAGFFQGLANK..EL.....WAEV ALEDNPLGRKVLFDQARKQL  
tr|A0A3A5FK19|A0A3A5FK19\_9DELT N..GK...AK..GLAGFLKGLASK..DL.....WTEV ALEDNPLGRKVLFDQARKQL  
tr|A0A3A8JQL9|A0A3A8JQL9\_9DELT S..GK...KK..GLAGFFQGLISK..DL.....WAEA ALEDNPLGRKVLFDQAKKAL  
tr|A0A7Y4NFA4|A0A7Y4NFA4\_9DELT S..GK...KK..GLAGLFQGLISK..DL.....WAEA ALEDNPLGRKVLFDQAKKAL  
tr|A0A3A8HDQ7|A0A3A8HDQ7\_9DELT S..SK...KK..GLAGLFQGLISK..DL.....WAEA ALEDNPLGRKVLFDQAKKAL  
tr|A0A3A8GR90|A0A3A8GR90\_9DELT S..SK...KK..GLAGLFQGLISK..DL.....DLWTEA ALEDNPLGRKVLFDQAKKAL  
tr|A0A3A8SBD7|A0A3A8SBD7\_9DELT S..GK...KK..GIAGLFQGLINK..DL.....WKEA ALEDNPLGRKVLFDQAKKAL  
tr|A0A3A8T0I8|A0A3A8T0I8\_9DELT S..GK...KK..GIAGLFQGLINK..DL.....WKEA ALEDNPLGRKVLFDQAKKAL  
tr|A0A7X5BU07|A0A7X5BU07\_9DELT S..SK...KK..GIAGLFQGLINK..DL.....WKEA ALEDNPLGRKVLFDQAKKAL  
tr|A0A7Y1RVL2|A0A7Y1RVL2\_9DELT S..SK...KK..GIAGLFQGLINK..DL.....WKEA ALEDNPLGRKVLFDQAKKAL  
tr|A0A3A8THN2|A0A3A8THN2\_9DELT S..SK...KK..GIAGLFQGLINK..DL.....WKEA ALEDNPLGRKVLFDQAKKAL  
tr|A0A7Y1RX76|A0A7Y1RX76\_9DELT S..SK...KK..GIAGLFQGLINK..DL.....WKEA ALEDNPLGRKVLFDQAKKAL  
tr|A0A3A8RA58|A0A3A8RA58\_9DELT S..GK...KK..GIAGLFQGLINK..DL.....WTEA ALEDNPLGRKVLFDQAKKAL  
tr|A0A410RPB6|A0A410RPB6\_CORCK S..GK...KK..GIAGLFQGLINK..DL.....WKEA ALEDNPLGRKVLFDQAKKAL  
tr|A0A7Y4J474|A0A7Y4J474\_CORCK S..GK...KK..GIAGLFQGLINK..DL.....WKEA ALEDNPLGRKVLFDQAKKAL  
tr|A0A3A8T9Z6|A0A3A8T9Z6\_9DELT S..GK...KK..GIAGLFQGLINK..DL.....WKEA ALEDNPLGRKVLFDQAKKAL  
tr|H8MKE9|H8MKE9\_CORCM S..GK...KK..GIAGIFQGLINK..DL.....WKEA ALEDNPLGRKVLFDQAKKAL  
tr|A0A3A8H102|A0A3A8H102\_9DELT S..GK...KK..GIAGIFQGLINK..DL.....WKEA ALEDNPLGRKVLFDQAKKAL  
tr|A0A554FW33|A0A554FW33\_9DELT S..GK...KR..GLAGFFQGLISK..EL.....WTEA ALEDNPLGRKVLFDQAKKAL  
tr|A0A3A8NPC0|A0A3A8NPC0\_9DELT S..GK...TK..GLAGFFQGLISK..DL.....WAEA ALEDNPIGRKVLFDQAKKAL  
tr|A0A3A8JUV3|A0A3A8JUV3\_9DELT S..GK...TK..GLAGFFQGLISK..DL.....WAEA ALEDNPLGRKVLFDQAKKAL  
tr|A0A3A8NEX6|A0A3A8NEX6\_9DELT S..GK...TK..GLAGFFQGLISK..DL.....WAEA ALEDNPIGRKVLFDQAKKAL  
tr|A0A3A8JEU8|A0A3A8JEU8\_9DELT S..GK...KK..GLAGIFQGLISK..DL.....WAEA ALEDNPLGRKVLFDQAKKAL  
tr|A0A3A8LI76|A0A3A8LI76\_9DELT S..GK...KK..GIAGLFQGLISK..DL.....DLWAEA ALEDNPLGRKVLFDQAKKAL  
tr|A0A085WXN8|A0A085WXN8\_9DELT Q...GK...SKK..GLAGMLQRLADK..AL.....WSEV ALEDNPLGRKVLFDQARKLL  
tr|A0A2T4VOM5|A0A2T4VOM5\_9DELT Q...GK...K..GLGGLLLGLTNK..EM.....WTEV ALEDNPIVGRKILFDQARKQL  
tr|A0A0G2ZSW5|A0A0G2ZSW5\_9DELT Q...GK...K..GLGGLLLGLTNK..EM.....WTEV ALEDNPIVGRKILFDQARKQL  
tr|A0A3M2DKY0|A0A3M2DKY0\_9DELT A..PE...PD..R..GALARVRDA..VRHLLSTEDLQAL ALEDNPIVGRKILFDQARKKV  
tr|A0A661NQ58|A0A661NQ58\_9DELT DEQGGHMHLPD..A.....DE.....LQEL ALTKNPLGRKVLFDQAEKQL  
tr|A0A520YD99|A0A520YD99\_9DELT ...VG...YVP..PRESFIEQLRDK..DS.....VTEF ALSKNPVGRKILFDQARKQL  
tr|A0A7Y3BRE4|A0A7Y3BRE4\_9DELT V...GY...VPP..R..ESFIEQLRDK..DS.....VTEF ALSKNPVGRKILFDQARKQL  
tr|A0A2D9TF90|A0A2D9TF90\_9DELT ...AG...EGH..LEEEGVFERFDGS..DA.....LKEL AMARNPVGRKILFDQARKQL  
tr|A0A2E0TP32|A0A2E0TP32\_9DELT E..EG...VPK..REVGLEQLQDS..SE.....LTEL ALTKNPLGRKVLFDQARKKL  
tr|A0A2E4Y3V1|A0A2E4Y3V1\_9PROT SGTMK...LKR..WK.....AK.....GKDK VLEDNFAGRALVFNQAKSMV  
tr|A0A2E6VRH4|A0A2E6VRH4\_9DELT S..GQLKTRKR..E.....PT.....AQQK ALEDTPPGRALFRQARSMV  
tr|A0A1F9FB59|A0A1F9FB59\_9DELT ELSRQ...EPK..K.....KLPER.....AAEA ALEDNPAGRALFRQARQMV



tr|A0A2D0KWM9|A0A2D0KWM9\_9GAMM RAKTHGHYPAPERIIDVIRLGLEKQKAGLQAESKAFGELAMSSSEALRSLFFATTSLK  
tr|A0A2D0LAI1|A0A2D0LAI1\_9GAMM RAKTHGHYPAPERIIDVIRLGLEKQKAGLQAESKAFGELAMSSSEALRSLFFATTSLK  
tr|A0A2D0IXC8|A0A2D0IXC8\_XENBU RAKTHGHYPAPERIIDVIRLGLEKQKAGLQAESKAFGELAMSSSEALRSLFFATTSLK  
tr|W1JAM5|W1JAM5\_9GAMM RAKTHGHYPAPERIIDVIRLGLEKQKAGLQAESKAFGELAMSSSEALRSLFFATTSLK  
tr|A0A3D9UED3|A0A3D9UED3\_9GAMM RAKTHGHYPAPERIIDVIRLGLEKQKAGLQAESKAFGELAMSSSEALRSLFFATTSLK  
tr|A0A1I3JCA9|A0A1I3JCA9\_9GAMM REKTRGHYPAPERKIINVRTGLEKGLDGFQAEARAFGELVMTQSEALRSLFFASTALK  
tr|A0A068QUL9|A0A068QUL9\_9GAMM REKTRGHYPAPERKIINVRTGLEKGLDGFQAEARAFGELVMTQSEALRSLFFASTALK  
tr|A0A0M0TCH6|A0A0M0TCH6\_9GAMM REKTRGHYPAPERKIINVRTGLEKGLDGFQAEARAFGELVMTQSEALRSLFFASTALK  
tr|A0A1Q5U854|A0A1Q5U854\_9GAMM REKTRGHYPAPERKIINVRTGLEKGLDGFQAEARAFGELVMTQSEALRSLFFASTALK  
tr|A0A2D0ISP1|A0A2D0ISP1\_9GAMM REKTRGHYPAPERKIINVRTGLEKGLDGFQAEARAFGELVMTQSEALRSLFFASTALK  
tr|A0A1Q5TUI8|A0A1Q5TUI8\_9GAMM REKTRGHYPAPERKIINVRTGLEKGLDGFQAEARAFGELVMTQSEALRSLFFASTALK  
tr|A0A2D0KJ17|A0A2D0KJ17\_9GAMM REKTRGHYPAPERKIINVRTGLEKGLDGFQAEARAFGELVMTQSEALRSLFFASTALK  
tr|A0A1Y25B97|A0A1Y25B97\_9GAMM REKTRGHYPAPERKIINVRTGLEKGLDGFQAEARAFGELVMTQSEALRSLFFASTALK  
tr|A0A1I5DWI7|A0A1I5DWI7\_9GAMM REKTRGHYPAPERKIINVRTGLEKGLDGFQAEARAFGELVMTQSEALRSLFFASTALK  
tr|A0A1I7GWY6|A0A1I7GWY6\_9GAMM RAKTHGHYPAPERKIINVRTGLEKGLDGFQAEARAFGELVMTQSEALRSLFFASTALK  
tr|D3VKY8|D3VKY8\_XENNA QAKTHGHYPAPERKIINVRTGLEKGLDGFQAEARAFGELVMTQSEALRSLFFASTALK  
tr|A0A2G0Q6Q9|A0A2G0Q6Q9\_9GAMM RAKTHGHYPAPERKIINVRTGLEKGLDGFQAEARAFGELVMTQSEALRSLFFASTALK  
tr|A0A2D0JU24|A0A2D0JU24\_9GAMM RAKTHGHYPAPERKIINVRTGLEKGLDGFQAEARAFGELVMTQSEALRSLFFASTALK  
tr|A0A0J5FN38|A0A0J5FN38\_9GAMM RAKTHGHYPAPERKIINVRTGLEKGLDGFQAEARAFGELVMTQSEALRSLFFASTALK  
tr|A0A432XLD4|A0A432XLD4\_9GAMM QAKAKGNYPALDKIIDTIRYAGDKGFKAGLEFARSFGLAMTPESEALRSLFFATTAMK  
tr|A0A2D8HU84|A0A2D8HU84\_9GAMM QKKAHGNYPALDKIIQTVREGVGEREAGLDKARSFGLAMTPESEALRSLFFATTAMK  
tr|A0A656X1Q2|A0A656X1Q2\_9GAMM QKKAHGNYPALDKIIQTVREGVGEREAGLDKARSFGLAMTPESEALRSLFFATTAMK  
tr|A0A4Q1QH79|A0A4Q1QH79\_9GAMM QKKAHGNYPALDKIIQTVREGVGEREAGLDKARSFGLAMTPESEALRSLFFATTAMK  
tr|A0A1G7LQE6|A0A1G7LQE6\_9GAMM QKKAHGNYPALDKIIQTVREGVGEREAGLDKARSFGLAMTPESEALRSLFFATTAMK  
tr|A0A432YV7|A0A432YV7\_9GAMM QKKAHGNYPALDKIIQTVREGVGEREAGLDKARSFGLAMTPESEALRSLFFATTAMK  
tr|A0A1J5N0P5|A0A1J5N0P5\_9GAMM LAKTKGNYPALDKIIDCVRGLNESRQAGLAIEASHFADLVMTDESKALRSLFFATTAMK  
tr|A0A0D8D548|A0A0D8D548\_9GAMM LAKTKGNYPALDKIIDCVRGLNESRQAGLAIEASHFADLVMTDESKALRSLFFATTAMK  
tr|A0A3E0TNM2|A0A3E0TNM2\_9GAMM LAKTKGNYPALDKIIDCVRGLNESRQAGLAIEASHFADLVMTDESKALRSLFFATTAMK  
tr|A0A3E0UD67|A0A3E0UD67\_9GAMM LAKTKGNYPALDKIIDCVRGLNESRQAGLAIEASHFADLVMTDESKALRSLFFATTAMK  
tr|A0A3E0UP04|A0A3E0UP04\_9GAMM LAKTKGNYPALDKIIDCVRGLNESRQAGLAIEASHFADLVMTDESKALRSLFFATTAMK  
tr|A0A0M2V8B1|A0A0M2V8B1\_9GAMM LKKTQGNYPAPVRIILEVVRKGLDGYAAGLAAEAKAFGLQCLMTKESALRSLFFATTOMK  
tr|A0A285ITY5|A0A285ITY5\_9GAMM LKKTQGNYPAPVRIILEVVRKGLDGYAAGLAAEAKAFGLQCLMTKESALRSLFFATTOMK  
tr|A0A486XTB9|A0A486XTB9\_9GAMM LKKTQGNYPAPVRIILEVVRKGLDGYAAGLAAEAKAFGLQCLMTKESALRSLFFATTOMK  
tr|I1E1G1|I1E1G1\_9GAMM LKKTQGNYPAPVRIILEVVRKGLDGYAAGLAAEAKAFGLQCLMTKESALRSLFFATTOMK  
tr|A0A1H6KJ68|A0A1H6KJ68\_9GAMM LKKTQGNYPAPVRIILEVVRKGLDGYAAGLAAEAKAFGLQCLMTKESALRSLFFATTOMK  
tr|A0A0X3Y764|A0A0X3Y764\_9GAMM LKKTQGNYPAPVRIILEVVRKGLDGYAAGLAAEAKAFGLQCLMTKESALRSLFFATTOMK  
tr|A0A2N1YEV4|A0A2N1YEV4\_9GAMM LKKTQGNYPAPVRIILEVVRKGLDGYAAGLAAEAKAFGLQCLMTKESALRSLFFATTOMK  
tr|A0A3P3QCM3|A0A3P3QCM3\_9GAMM LKKTQGNYPAPVRIILEVVRKGLDGYAAGLAAEAKAFGLQCLMTKESALRSLFFATTOMK  
tr|F7NT72|F7NT72\_9GAMM LKKTQGNYPAPVRIILEVVRKGLDGYAAGLAAEAKAFGLQCLMTKESALRSLFFATTOMK  
tr|A0A3S2TW63|A0A3S2TW63\_9GAMM LKKTQGNYPAPVRIILEVVRKGLDGYAAGLAAEAKAFGLQCLMTKESALRSLFFATTOMK  
tr|A0A3D5BGW7|A0A3D5BGW7\_9GAMM LKKTQGNYPAPVRIILEVVRKGLDGYAAGLAAEAKAFGLQCLMTKESALRSLFFATTOMK  
tr|A0A5C7T117|A0A5C7T117\_9GAMM LKKTQGNYPAPVRIILEVVRKGLDGYAAGLAAEAKAFGLQCLMTKESALRSLFFATTOMK  
tr|A0A0U4W982|A0A0U4W982\_9GAMM LKKTQGNYPAPVRIILEVVRKGLDGYAAGLAAEAKAFGLQCLMTKESALRSLFFATTOMK  
tr|A0A2I0FCM2|A0A2I0FCM2\_9GAMM LKKTQGNYPAPVRIILEVVRKGLDGYAAGLAAEAKAFGLQCLMTKESALRSLFFATTOMK  
tr|A0A2G2IVL1|A0A2G2IVL1\_9GAMM LKKTQGNYPAPVRIILEVVRKGLDGYAAGLAAEAKAFGLQCLMTKESALRSLFFATTOMK  
tr|A6F721|A6F721\_9GAMM LKKTQGNYPAPVRIILEVVRKGLDGYAAGLAAEAKAFGLQCLMTKESALRSLFFATTOMK  
tr|A0A4U1BNR2|A0A4U1BNR2\_9GAMM LKKTQGNYPAPVRIILEVVRKGLDGYAAGLAAEAKAFGLQCLMTKESALRSLFFATTOMK  
tr|E1S060|E1S060\_FERBD LKKTQGNYPAPVRIILEVVRKGLDGYAAGLAAEAKAFGLQCLMTKESALRSLFFATTOMK  
tr|A0A4Y6IZ09|A0A4Y6IZ09\_9GAMM LKKTQGNYPAPVRIILEVVRKGLDGYAAGLAAEAKAFGLQCLMTKESALRSLFFATTOMK  
tr|A0A0C3QSZ7|A0A0C3QSZ7\_9GAMM LKKTQGNYPAPVRIILEVVRKGLDGYAAGLAAEAKAFGLQCLMTKESALRSLFFATTOMK  
tr|A0A6L7HXW0|A0A6L7HXW0\_9GAMM LKKTQGNYPAPVRIILEVVRKGLDGYAAGLAAEAKAFGLQCLMTKESALRSLFFATTOMK  
sp|A3QFP3|FADJ\_SHELP LKKTQGNYPAPVRIILEVVRKGLDGYAAGLAAEAKAFGLQCLMTKESALRSLFFATTOMK  
tr|A0A1E5IXH7|A0A1E5IXH7\_SHECO LKKTQGNYPAPVRIILEVVRKGLDGYAAGLAAEAKAFGLQCLMTKESALRSLFFATTOMK  
tr|A0A411PKQ0|A0A411PKQ0\_9GAMM LKKTQGNYPAPVRIILEVVRKGLDGYAAGLAAEAKAFGLQCLMTKESALRSLFFATTOMK  
tr|A0A6G9QKM3|A0A6G9QKM3\_9GAMM LKKTQGNYPAPVRIILEVVRKGLDGYAAGLAAEAKAFGLQCLMTKESALRSLFFATTOMK  
tr|A0A6P1UL63|A0A6P1UL63\_9GAMM LKKTQGNYPAPVRIILEVVRKGLDGYAAGLAAEAKAFGLQCLMTKESALRSLFFATTOMK  
tr|A0A2N1ER19|A0A2N1ER19\_9GAMM LKKTQGNYPAPVRIILEVVRKGLDGYAAGLAAEAKAFGLQCLMTKESALRSLFFATTOMK  
tr|A0A7W4FU55|A0A7W4FU55\_9GAMM LKKTQGNYPAPVRIILEVVRKGLDGYAAGLAAEAKAFGLQCLMTKESALRSLFFATTOMK  
sp|Q8ECP7|FADJ\_SHEON LKKTQGNYPAPVRIILEVVRKGLDGYAAGLAAEAKAFGLQCLMTKESALRSLFFATTOMK  
tr|A0A501XZY8|A0A501XZY8\_9GAMM LKKTQGNYPAPVRIILEVVRKGLDGYAAGLAAEAKAFGLQCLMTKESALRSLFFATTOMK  
tr|A0A2W5DCZ0|A0A2W5DCZ0\_SHEOE LKKTQGNYPAPVRIILEVVRKGLDGYAAGLAAEAKAFGLQCLMTKESALRSLFFATTOMK  
tr|A0A1E3V3C8|A0A1E3V3C8\_9GAMM LKKTQGNYPAPVRIILEVVRKGLDGYAAGLAAEAKAFGLQCLMTKESALRSLFFATTOMK  
tr|A0A1Z4AI20|A0A1Z4AI20\_9GAMM LKKTQGNYPAPVRIILEVVRKGLDGYAAGLAAEAKAFGLQCLMTKESALRSLFFATTOMK  
tr|A0A7X9LJL9|A0A7X9LJL9\_9GAMM LKKTQGNYPAPVRIILEVVRKGLDGYAAGLAAEAKAFGLQCLMTKESALRSLFFATTOMK  
tr|A0A073KMY5|A0A073KMY5\_9GAMM LKKTQGNYPAPVRIILEVVRKGLDGYAAGLAAEAKAFGLQCLMTKESALRSLFFATTOMK  
sp|A0KV76|FADJ\_SHEA LKKTQGNYPAPVRIILEVVRKGLDGYAAGLAAEAKAFGLQCLMTKESALRSLFFATTOMK  
tr|A0A220UTH7|A0A220UTH7\_9GAMM LKKTQGNYPAPVRIILEVVRKGLDGYAAGLAAEAKAFGLQCLMTKESALRSLFFATTOMK  
tr|A0A5B8R6W1|A0A5B8R6W1\_9GAMM LKKTQGNYPAPVRIILEVVRKGLDGYAAGLAAEAKAFGLQCLMTKESALRSLFFATTOMK  
tr|V1DAI4|V1DAI4\_9GAMM LKKTQGNYPAPVRIILEVVRKGLDGYAAGLAAEAKAFGLQCLMTKESALRSLFFATTOMK  
tr|A0A448CPQ4|A0A448CPQ4\_SHEPU LKKTQGNYPAPVRIILEVVRKGLDGYAAGLAAEAKAFGLQCLMTKESALRSLFFATTOMK  
tr|A0A252ERQ3|A0A252ERQ3\_SHEPU LKKTQGNYPAPVRIILEVVRKGLDGYAAGLAAEAKAFGLQCLMTKESALRSLFFATTOMK  
sp|Q0HKD1|FADJ\_SHEM LKKTQGNYPAPVRIILEVVRKGLDGYAAGLAAEAKAFGLQCLMTKESALRSLFFATTOMK  
sp|Q0HWN3|FADJ\_SHESR LKKTQGNYPAPVRIILEVVRKGLDGYAAGLAAEAKAFGLQCLMTKESALRSLFFATTOMK  
tr|F7RQE3|F7RQE3\_9GAMM LKKTQGNYPAPVRIILEVVRKGLDGYAAGLAAEAKAFGLQCLMTKESALRSLFFATTOMK  
tr|B8EE98|B8EE98\_SHEB2 LKKTQGNYPAPVRIILEVVRKGLDGYAAGLAAEAKAFGLQCLMTKESALRSLFFATTOMK  
sp|A6WQ25|FADJ\_SHEB8 LKKTQGNYPAPVRIILEVVRKGLDGYAAGLAAEAKAFGLQCLMTKESALRSLFFATTOMK  
tr|A0A448EK41|A0A448EK41\_9GAMM LKKTQGNYPAPVRIILEVVRKGLDGYAAGLAAEAKAFGLQCLMTKESALRSLFFATTOMK  
tr|A0A553JHX1|A0A553JHX1\_SHEHA LKKTQGNYPAPVRIILEVVRKGLDGYAAGLAAEAKAFGLQCLMTKESALRSLFFATTOMK  
tr|B8CPY6|B8CPY6\_SHEFW LKKTQGNYPAPVRIILEVVRKGLDGYAAGLAAEAKAFGLQCLMTKESALRSLFFATTOMK  
tr|A0A431WFC4|A0A431WFC4\_9GAMM LKKTQGNYPAPVRIILEVVRKGLDGYAAGLAAEAKAFGLQCLMTKESALRSLFFATTOMK  
tr|A8FTR7|A8FTR7\_SHESH LKKTQGNYPAPVRIILEVVRKGLDGYAAGLAAEAKAFGLQCLMTKESALRSLFFATTOMK  
tr|A0A431WNL0|A0A431WNL0\_9GAMM LKKTQGNYPAPVRIILEVVRKGLDGYAAGLAAEAKAFGLQCLMTKESALRSLFFATTOMK  
tr|A0A550AEC5|A0A550AEC5\_9GAMM LKKTQGNYPAPVRIILEVVRKGLDGYAAGLAAEAKAFGLQCLMTKESALRSLFFATTOMK  
tr|A0A7L4WW90|A0A7L4WW90\_9GAMM LKKTQGNYPAPVRIILEVVRKGLDGYAAGLAAEAKAFGLQCLMTKESALRSLFFATTOMK  
tr|A9DDU3|A9DDU3\_9GAMM LKKTQGNYPAPVRIILEVVRKGLDGYAAGLAAEAKAFGLQCLMTKESALRSLFFATTOMK  
tr|A0A330M2B9|A0A330M2B9\_9GAMM LKKTQGNYPAPVRIILEVVRKGLDGYAAGLAAEAKAFGLQCLMTKESALRSLFFATTOMK  
tr|A0A5N8UFC7|A0A5N8UFC7\_9GAMM LKKTQGNYPAPVRIILEVVRKGLDGYAAGLAAEAKAFGLQCLMTKESALRSLFFATTOMK  
tr|A0A1S6HN57|A0A1S6HN57\_9GAMM LKKTQGNYPAPVRIILEVVRKGLDGYAAGLAAEAKAFGLQCLMTKESALRSLFFATTOMK  
tr|D4ZMH7|D4ZMH7\_SHEVD LKKTQGNYPAPVRIILEVVRKGLDGYAAGLAAEAKAFGLQCLMTKESALRSLFFATTOMK  
tr|A0A3L8Q213|A0A3L8Q213\_9GAMM LKKTQGNYPAPVRIILEVVRKGLDGYAAGLAAEAKAFGLQCLMTKESALRSLFFATTOMK  
tr|A0A3A6U4N9|A0A3A6U4N9\_9GAMM LKKTQGNYPAPVRIILEVVRKGLDGYAAGLAAEAKAFGLQCLMTKESALRSLFFATTOMK  
tr|A0A4Q5MA37|A0A4Q5MA37\_9GAMM LKKTQGNYPAPVRIILEVVRKGLDGYAAGLAAEAKAFGLQCLMTKESALRSLFFATTOMK  
tr|A0A1L6LSX5|A0A1L6LSX5\_9DELTA LKKTQGNYPAPVRIILEVVRKGLDGYAAGLAAEAKAFGLQCLMTKESALRSLFFATTOMK  
tr|A0A2W4L9B9|A0A2W4L9B9\_9PROT LKKTQGNYPAPVRIILEVVRKGLDGYAAGLAAEAKAFGLQCLMTKESALRSLFFATTOMK  
tr|A0A2W4M4E6|A0A2W4M4E6\_9PROT LKKTQGNYPAPVRIILEVVRKGLDGYAAGLAAEAKAFGLQCLMTKESALRSLFFATTOMK  
tr|A0A6I2GRX9|A0A6I2GRX9\_9DELTA LKKTQGNYPAPVRIILEVVRKGLDGYAAGLAAEAKAFGLQCLMTKESALRSLFFATTOMK  
tr|A0A0H4WMK2|A0A0H4WMK2\_9DELTA LKKTQGNYPAPVRIILEVVRKGLDGYAAGLAAEAKAFGLQCLMTKESALRSLFFATTOMK  
tr|F8CJ36|F8CJ36\_MYXHF LKKTQGNYPAPVRIILEVVRKGLDGYAAGLAAEAKAFGLQCLMTKESALRSLFFATTOMK  
tr|A0A250K0F1|A0A250K0F1\_9DELTA LKKTQGNYPAPVRIILEVVRKGLDGYAAGLAAEAKAFGLQCLMTKESALRSLFFATTOMK  
tr|A0A7Y6WFZ2|A0A7Y6WFZ2\_9DELTA LKKTQGNYPAPVRIILEVVRKGLDGYAAGLAAEAKAFGLQCLMTKESALRSLFFATTOMK  
tr|A0A7Y7C660|A0A7Y7C660\_9DELTA LKKTQGNYPAPVRIILEVVRKGLDGYAAGLAAEAKAFGLQCLMTKESALRSLFFATTOMK  
tr|A0A7Y4JFH2|A0A7Y4JFH2\_MYXXA LKKTQGNYPAPVRIILEVVRKGLDGYAAGLAAEAKAFGLQCLMTKESALRSLFFATTOMK  
tr|A0A4Y6CZQ9|A0A4Y6CZQ9\_MYXXA LKKTQGNYPAPVRIILEVVRKGLDGYAAGLAAEAKAFGLQCLMTKESALRSLFFATTOMK

tr|A0A7Y4IKV5|A0A7Y4IKV5\_MYXXA LKKTRGKFPAPPEKALQVVVRVGLSEGHKAGQEAEAKAFGELVSDVSKRLVEIFFATTALK  
tr|A0A511HHB0|A0A511HHB0\_9DELT LKKTRGKFPAPPEKALQVVVRVGLSEGHKAGQEAEAKAFGELVSDVSKRLVEIFFATTALK  
tr|A0A4Y6CKY7|A0A4Y6CKY7\_MYXXA LKKTRGKFPAPPEKALQVVVRVGLSEGHKAGQEAEAKAFGELVSDVSKRLVEIFFATTALK  
tr|Q1D1F2|Q1D1F2\_MYXXD LKKTRGKFPAPPEKALQVVVRVGLSEGHKAGQEAEAKAFGELVSDVSKRLVEIFFATTALK  
tr|A0A7Y4MA14|A0A7Y4MA14\_MYXXA LKKTRGKFPAPPEKALQVVVRVGLSEGHKAGQEAEAKAFGELVSDVSKRLVEIFFATTALK  
tr|A0A7T8Y4N9|A0A7T8Y4N9\_MYXXA LKKTRGKFPAPPEKALQVVVRVGLSEGHKAGQEAEAKAFGELVSDVSKRLVEIFFATTALK  
tr|L7UB67|L7UB67\_MYXSD LKKTRGKFPAPPEKALQVVVRVGLSEGHKAGQEAEAKAFGELVSDVSKRLVEIFFATTALK  
tr|A0A511T9X1|A0A511T9X1\_MYXFU LKKTRGKFPAPPEKALRVVRTGLSEGRQAGLAAEAKAFGELVMSDVSKRLVEIFFATTALK  
tr|A0A7Y7C9C4|A0A7Y7C9C4\_9DELT RKKTRGKFPAPPEKALQVVVRVGLSEGRKAGLEAEAKAFGELVMSDVSKRLVEIFFATTALK  
tr|A0A540X7W8|A0A540X7W8\_9DELT RKKTRGKFPAPPEKALQVVVRVGLSEGRKAGLEAEAKAFGELVMSDVSKRLVEIFFATTALK  
tr|A0A3A5FK19|A0A3A5FK19\_9DELT LKKTRGKFPAPPEKALQVVVRVGLSEGRKAGLEAEAKAFGELVSDVSKRLVEIFFATTALK  
tr|A0A3A8JQL9|A0A3A8JQL9\_9DELT LKKTRGKFPAPPEKALQVVVRVGLSEGRKAGLEAEAKAFGELVSDVSKRLVEIFFATTALK  
tr|A0A7Y4NFA4|A0A7Y4NFA4\_9DELT LKKTRGKFPAPPEKALQVVVRVGLSEGRKAGLEAEAKAFGELVSDVSKRLVEIFFATTALK  
tr|A0A3A8HDQ7|A0A3A8HDQ7\_9DELT LKKTRGKFPAPPEKALQVVVRVGLSEGRKAGLEAEAKAFGELVSDVSKRLVEIFFATTALK  
tr|A0A3A8GR90|A0A3A8GR90\_9DELT LKKTRGKFPAPPEKALQVVVRVGLSEGRKAGLEAEAKAFGELVSDVSKRLVEIFFATTALK  
tr|A0A3A8SBD7|A0A3A8SBD7\_9DELT LKKTRGKFPAPPEKALQVVVRVGLSEGRKAGLEAEAKAFGELVSDVSKRLVEIFFATTALK  
tr|A0A3A8T0I8|A0A3A8T0I8\_9DELT LKKTRGKFPAPPEKALQVVVRVGLSEGRKAGLEAEAKAFGELVSDVSKRLVEIFFATTALK  
tr|A0A7X5BU07|A0A7X5BU07\_9DELT LKKTRGKFPAPPEKALQVVVRVGLSEGRKAGLEAEAKAFGELVSDVSKRLVEIFFATTALK  
tr|A0A7Y1RVL2|A0A7Y1RVL2\_9DELT LKKTRGKFPAPPEKALQVVVRVGLSEGRKAGLEAEAKAFGELVSDVSKRLVEIFFATTALK  
tr|A0A3A8THN2|A0A3A8THN2\_9DELT LKKTRGKFPAPPEKALQVVVRVGLSEGRKAGLEAEAKAFGELVSDVSKRLVEIFFATTALK  
tr|A0A7Y1RX76|A0A7Y1RX76\_9DELT LKKTRGKFPAPPEKALQVVVRVGLSEGRKAGLEAEAKAFGELVSDVSKRLVEIFFATTALK  
tr|A0A3A8RA58|A0A3A8RA58\_9DELT LKKTRGKFPAPPEKALQVVVRVGLSEGRKAGLEAEAKAFGELVSDVSKRLVEIFFATTALK  
tr|A0A410RPB6|A0A410RPB6\_CORCK LKKTRGKFPAPPEKALQVVVRVGLSEGRKAGLEAEAKAFGELVSDVSKRLVEIFFATTALK  
tr|A0A7Y4J474|A0A7Y4J474\_CORCK LKKTRGKFPAPPEKALQVVVRVGLSEGRKAGLEAEAKAFGELVSDVSKRLVEIFFATTALK  
tr|A0A3A8I9Z6|A0A3A8I9Z6\_9DELT LKKTRGKFPAPPEKALQVVVRVGLSEGRKAGLEAEAKAFGELVSDVSKRLVEIFFATTALK  
tr|H8MKE9|H8MKE9\_CORCM LKKTRGKFPAPPEKALQVVVRVGLSEGRKAGLEAEAKAFGELVSDVSKRLVEIFFATTALK  
tr|A0A3A8H102|A0A3A8H102\_9DELT LKKTRGKFPAPPEKALQVVVRVGLSEGRKAGLEAEAKAFGELVSDVSKRLVEIFFATTALK  
tr|A0A554FW33|A0A554FW33\_9DELT LKKTRGKFPAPPEKALQVVVRVGLSEGRKAGLEAEAKAFGELVSDVSKRLVEIFFATTALK  
tr|A0A3A8NPC0|A0A3A8NPC0\_9DELT LKKTRGKFPAPPEKALQVVVRVGLSEGRKAGLEAEAKAFGELVSDVSKRLVEIFFATTALK  
tr|A0A3A8JUV3|A0A3A8JUV3\_9DELT LKKTRGKFPAPPEKALQVVVRVGLSEGRKAGLEAEAKAFGELVSDVSKRLVEIFFATTALK  
tr|A0A3A8NEX6|A0A3A8NEX6\_9DELT LKKTRGKFPAPPEKALQVVVRVGLSEGRKAGLEAEAKAFGELVSDVSKRLVEIFFATTALK  
tr|A0A3A8JEU8|A0A3A8JEU8\_9DELT LKKTRGKFPAPPEKALQVVVRVGLSEGRKAGLEAEAKAFGELVSDVSKRLVEIFFATTALK  
tr|A0A3A8LI76|A0A3A8LI76\_9DELT LKKTRGKFPAPPEKALQVVVRVGLSEGRKAGLEAEAKAFGELVSDVSKRLVEIFFATTALK  
tr|A0A085WXN8|A0A085WXN8\_9DELT LKKTRGKFPAPPEKALEAIRVGVESGRKAGLEAEAKAFGELVSDVSKRLVEIFFATTALK  
tr|A0A2T4V0M5|A0A2T4V0M5\_9DELT RKKTRGKFPAPPEKALEAIRVGVESGRKAGLEAEAKAFGELVSDVSKRLVEIFFATTALK  
tr|A0A0G2ZSW5|A0A0G2ZSW5\_9DELT RKKTRGKFPAPPEKALEAIRVGVESGRKAGLEAEAKAFGELVSDVSKRLVEIFFATTALK  
tr|A0A3M2DKY0|A0A3M2DKY0\_9DELT LAQTHGNYPAPPLAILEVVRTGLDKGLDAGLEAEAKAFGRLVASPEAKQLMGIFFATRALE  
tr|A0A661NQ58|A0A661NQ58\_9DELT RAKTRGNYPAPPEKILEAVRTGLADGFDAAGLEAEARRLFGELTVSPEAAALMSIFFATTALK  
tr|A0A520YD99|A0A520YD99\_9DELT HKQTRGNYPAPQDLIIDIIVKTGLEDFEAGLAAEARGFGRLLTTPPEAANLMSIFFATTALK  
tr|A0A7Y3BRE4|A0A7Y3BRE4\_9DELT HKQTRGNYPAPQDLIIDIIVKTGLEDFEAGLAAEARGFGRLLTTPPEAANLMSIFFATTALK  
tr|A0A2D9TF90|A0A2D9TF90\_9DELT HKKTRGNYPAPPEKILDDVVKIGLEKGRAGLEAEASAFFGELVMSPESEALRSIYFATQVMK  
tr|A0A2E0TP32|A0A2E0TP32\_9DELT HEKTRGNYPAPQDRILDVVKIGLEKGRAGLEAEATHFGELVMSPESEALRSIYFATQAMK  
tr|A0A2E4Y3V1|A0A2E4Y3V1\_9PROT LKKTGGLYPPAPLKILEAVKAGVNSGPKKGYETEADLFGDLAMTRESKSLISLIEGQTSLK  
tr|A0A2E6VRH4|A0A2E6VRH4\_9DELT LKQTQGLYPPSPLAILDVVEHGYKRCIRAGFNMESEKFAELSQTPACGSLMSLFFGQQTCK  
tr|A0A1F9FB59|A0A1F9FB59\_9DELT MEKTRGLYPPAPLAIIDVVEAGTGKGPFAAGYGEESRRFFGELVMSKEAAA LMTLFFAQATLAK



tr|A0A2D0KWM9|A0A2D0KWM9\_9GAMM|NETG...SSELPAQIRHVGILGG|LMGG|IANVTA TRGHLP SRIKD INERGINQAL KKYTW

tr|A0A2D0LAI1|A0A2D0LAI1\_9GAMM|NETG...SSELPAQIRHVGILGG|LMGG|IANVTA TRGHLP SRIKD INERGINQAL KKYTW

tr|A0A2D0IXC8|A0A2D0IXC8\_XENBU|NETG...SSEOPVKIKHVGILGG|LMGG|IANVTVTRGNLPVRIKD INEKGINQAL KKYTW

tr|W1JAM5|W1JAM5\_9GAMM|NETG...SSEOPAKIKHVGILGG|LMGG|IASVTA TRGNLPVRIKD INEKGINQAL KKYTW

tr|A0A3D9UED3|A0A3D9UED3\_9GAMM|NETG...SSEOPAKIKHVGILGG|LMGG|IASVTA TRGNLPVRIKD INEKGINQAL KKYTW

tr|A0A1I3JCA9|A0A1I3JCA9\_9GAMM|NETG...SSEKPAKIKQVGLGG|LMGG|IANVTVTRGNLPVRIKD INEKGINQAL KKYTW

tr|A0A068QUL9|A0A068QUL9\_9GAMM|NETG...SSEOPAEIKQVGLGG|LMGG|IANVTA TRGNLPVRIKD INEKGINQAL KKYTW

tr|A0A0M0TCH6|A0A0M0TCH6\_9GAMM|NETG...SSEPPAEIRHVGILGG|LMGG|IANVTVTRGNLPVRIKD INEKGINQAL KKYTW

tr|A0A1Q5U854|A0A1Q5U854\_9GAMM|NETG...SLEQP AEIKHVGILGG|LMGG|IANVTVTRGNLPVRIKD INEKGINQAL KKYTW

tr|A0A2D0ISP1|A0A2D0ISP1\_9GAMM|NETG...SSEOPAEIRHVGILGG|LMGG|IANVTVTRGNLPVRIKD INEKGINQAL KKYTW

tr|A0A1Q5TUI8|A0A1Q5TUI8\_9GAMM|NETG...SSEOPAEIKHVGILGG|LMGG|IANVTVTRGNLPVRIKD INEKGINQAL KKYTW

tr|A0A2D0KJI7|A0A2D0KJI7\_9GAMM|NETG...SSEOPAEIKHVGILGG|LMGG|IANVTVTRGNLPVRIKD INEKGINQAL KKYTW

tr|A0A1Y2SB97|A0A1Y2SB97\_9GAMM|NETG...SSEOPAEIKHVGILGG|LMGG|IANVTVTRGNLPVRIKD INEKGINQAL KKYTW

tr|A0A1I5DWI7|A0A1I5DWI7\_9GAMM|NETG...SSEOPAEIKYVGLGG|LMGG|IANVTVTRGNLPVRIKD INEKGINQAL KKYTW

tr|A0A1I7GWY6|A0A1I7GWY6\_9GAMM|NETG...SSEOPAEIKQVGLGG|LMGG|IANVTVTRGNLPVRIKD INEKGINQAL KKYTW

tr|D3VKY8|D3VKY8\_XENNA|NETG...SSEOPAEIKQVGLGG|LMGG|IANVTVTRGNLPVRIKD INEKGINQAL KKYTW

tr|A0A2G0Q6Q9|A0A2G0Q6Q9\_9GAMM|NETG...SSEOPAEIKHVGILGG|LMGG|IANVTVTRGNLPVRIKD INEKGINQAL KKYTW

tr|A0A2D0JU24|A0A2D0JU24\_9GAMM|NETG...SSEOPADIKHVGILGG|LMGG|IANVTVTRGNLPVRIKD INEKGINQAL KKYTW

tr|A0A0J5FN38|A0A0J5FN38\_9GAMM|NETG...SSEOPAEIKHVGILGG|LMGG|IANVTVTRGNLPVRIKD INEKGINQAL KKYTW

tr|A0A432XLD4|A0A432XLD4\_9GAMM|KETGA...GDTKPRDIQRVGLGG|LMGG|IAYVTA AKAGLPARIKDIENGINVHALKYSY

tr|A0A2D8HU84|A0A2D8HU84\_9GAMM|KETGA...DGVEPDSVKKVGLGG|LMGG|IAYVTA AKAGLPARIKDISEGGISNALHYSY

tr|A0A656X1Q2|A0A656X1Q2\_9GAMM|KETGA...DGVEPDPVKKVGLGG|LMGG|IAYVTA AKAGLPARIKDISEGGISNALHYSY

tr|A0A4Q1QH79|A0A4Q1QH79\_9GAMM|KETGA...DGVEPDPVKKVGLGG|LMGG|IAYVTA AKAGLPARIKDISEGGISNALHYSY

tr|A0A1G7LQE6|A0A1G7LQE6\_9GAMM|KETGA...DGVEPDPVKKVGLGG|LMGG|IAYVTA AKAGLPARIKDISEGGISNALHYSY

tr|A0A432YV7|A0A432YV7\_9GAMM|KETGA...DGVEPDPVKKVGLGG|LMGG|IAYVTA AKAGLPARIKDISEGGISNALHYSY

tr|A0A1J5N0P5|A0A1J5N0P5\_9GAMM|KETGA...SDAQPEKVNKAMILGG|LMGG|IANVTA IAKANIPARIKDISEGGISNALKYSY

tr|A0A0D8D548|A0A0D8D548\_9GAMM|KEQGV...AGVEPEKIAKAGVGLGG|LMGG|IAFVTA AKAGLPARIKDISEGGISNALHYSY

tr|A0A3E0TNM2|A0A3E0TNM2\_9GAMM|KEDGV...AGVAPEKISKAGVGLGG|LMGG|IAFVTA AKAGLPARIKDISEGGISNALHYSY

tr|A0A3E0UD67|A0A3E0UD67\_9GAMM|KEDGV...EGVAPEKIAKAGVGLGG|LMGG|IAFVTA AKAGLPARIKDISEGGISNALHYSY

tr|A0A3E0U0P4|A0A3E0U0P4\_9GAMM|KEDGV...EGVAPEKIAKAGVGLGG|LMGG|IAFVTA AKAGLPARIKDISEGGISNALHYSY

tr|A0A0M2V8B1|A0A0M2V8B1\_9GAMM|KETGA...GDTQPKPVHKAIVLGG|LMGG|IANVSTAKAGVPVRIKDISEGGISNALKYSY

tr|A0A285ITY5|A0A285ITY5\_9GAMM|KETGA...GETQPKPVHKAIVLGG|LMGG|IANVSTAKAGVPVRIKDISEGGISNALKYSY

tr|A0A486XTB9|A0A486XTB9\_9GAMM|KETGA...GDTKPKQVKKAVLGG|LMGG|IANVTA AKAGLPARIKDISEGGISNALKYSY

tr|I1E1G1|I1E1G1\_9GAMM|KETGA...GETKPNKVRKAIVLGG|LMGG|IANVTA AKAGLPARIKDISEGGISNALKYSY

tr|A0A1H6KJ68|A0A1H6KJ68\_9GAMM|KESGA...GDTKPNKVRKAIVLGG|LMGG|IANVTA AKAGLPARIKDISEGGISNALKYSY

tr|A0A0X3Y764|A0A0X3Y764\_9GAMM|KESGA...GDTKPNKVRKAIVLGG|LMGG|IANVTA AKAGLPARIKDISEGGISNALKYSY

tr|A0A2N1YEV4|A0A2N1YEV4\_9GAMM|KESGA...GDTKPNKVRKAIVLGG|LMGG|IANVTA AKAGLPARIKDISEGGISNALKYSY

tr|A0A3P3QCM3|A0A3P3QCM3\_9GAMM|KETGA...GDVQPHKVKAAIVLGG|LMGG|IANVTA AKAGVPVRIKDISEGGISNALKYSY

tr|F7NT72|F7NT72\_9GAMM|KETGA...GDVVPKVKAAIVLGG|LMGG|IANVTA AKAGVPVRIKDISEGGISNALKYSY

tr|A0A3S2TW63|A0A3S2TW63\_9GAMM|KETGA...GDVVPKVKAAIVLGG|LMGG|IANVTA AKAGVPVRIKDISEGGISNALKYSY

tr|A0A3D5BGW7|A0A3D5BGW7\_9GAMM|KETGA...GDVVPKVKAAIVLGG|LMGG|IANVTA AKAGVPVRIKDISEGGISNALKYSY

tr|A0A5C7T117|A0A5C7T117\_9GAMM|KESGA...GDAKPRKVKAAIVLGG|LMGG|IANVTA AKAGVPVRIKDISEGGISNALKYSY

tr|A0A0U4W982|A0A0U4W982\_9GAMM|KESGA...GDAKPRKVKAAIVLGG|LMGG|IANVTA AKAGVPVRIKDISEGGISNALKYSY

tr|A0A2I0FCM2|A0A2I0FCM2\_9GAMM|KEDGV...AGVAPKVKAAIVLGG|LMGG|IANVTA AKAGVPVRIKDISEGGISNALKYSY

tr|A0A2G2IVL1|A0A2G2IVL1\_9GAMM|KEDGV...EGVAPKVKAAIVLGG|LMGG|IANVTA AKAGVPVRIKDISEGGISNALKYSY

tr|A6F121|A6F121\_9GAMM|KEDGV...EGVAPKVKAAIVLGG|LMGG|IANVTA AKAGVPVRIKDISEGGISNALKYSY

|A0A4U1BNR2|A0A4U1BNR2\_9GAMM|KETGA...GDVEPKVKRMMVLLGG|LMGG|IANVTA AKAGVPVRIKDISEGGISNALKYSY
|E1S060|E1S060\_FERBD|KETGA...GDAKPLLNKVMVLLGG|LMGG|IASVTA LKAKLPARIKDISEGGISNALAYAY
|A0A4Y6IZ09|A0A4Y6IZ09\_9GAMM|KESGA...GDVSPKAVNKVMVLLGG|LMGG|IASVTA LKAKLPARIKDISEGGISNALAYAY
|A0A0C3QSZ7|A0A0C3QSZ7\_9GAMM|KETGA...GDVSPQAVNKVMVLLGG|LMGG|IASVTA LKAKLPARIKDISEGGISNALAYAY
|A0A6L7HXW0|A0A6L7HXW0\_9GAMM|KETGA...GDVTPKAVNKVMVLLGG|LMGG|IASVTA LKAKLPARIKDISEGGISNALAYAY
|A3QFP3|FADJ\_SHELP|KESGA...GDVSPKAVNKVMVLLGG|LMGG|IASVTA LKAKLPARIKDISEGGISNALAYAY
|A0A1E5IXH7|A0A1E5IXH7\_SHECO|KETGA...GDVQAKPVKAMVLLGG|LMGG|IASVTA LKAKLPARIKDISEGGISNALAYAY
|A0A411PKQ0|A0A411PKQ0\_9GAMM|KETGA...EGAEPRKINKAMVLLGG|LMGG|IASVTA LKAKLPARIKDISEGGISNALAYAY
|A0A6G9QKM3|A0A6G9QKM3\_9GAMM|KETGA...AGAEPRKINKAMVLLGG|LMGG|IASVTA LKAKLPARIKDISEGGISNALAYAY
|A0A6P1UL63|A0A6P1UL63\_9GAMM|KETGA...EGAVPRKVKVMVLLGG|LMGG|IASVTA LKAKLPARIKDISEGGISNALAYAY
|A0A2N1ERI9|A0A2N1ERI9\_9GAMM|KETGA...EGAVPRKVKVMVLLGG|LMGG|IASVTA LKAKLPARIKDISEGGISNALAYAY
|A0A7W4FU55|A0A7W4FU55\_9GAMM|KETGA...EGAVPRKVKVMVLLGG|LMGG|IASVTA LKAKLPARIKDISEGGISNALAYAY
|Q8ECP7|FADJ\_SHEON|KETGA...EGATPRKVKKAVLGG|LMGG|IASVTA LKAKLPARIKDISEGGISNALAYAY
|A0A501XZY8|A0A501XZY8\_9GAMM|KETGA...EGATPRKVKKAVLGG|LMGG|IASVTA LKAKLPARIKDISEGGISNALAYAY
|A0A2W5DCZ0|A0A2W5DCZ0\_SHEOE|KETGA...EGATPRKVKKAVLGG|LMGG|IASVTA LKAKLPARIKDISEGGISNALAYAY
|A0A1E3V3C8|A0A1E3V3C8\_9GAMM|KETGA...EGATPRKVKKAVLGG|LMGG|IASVTA LKAKLPARIKDISEGGISNALAYAY
|A0A1Z4AI20|A0A1Z4AI20\_9GAMM|KETGA...EGATPRKVKKAVLGG|LMGG|IASVTA LKAKLPARIKDISEGGISNALAYAY
|A0A7X9LJL9|A0A7X9LJL9\_9GAMM|KETGA...EGATPRKVKKAVLGG|LMGG|IASVTA LKAKLPARIKDISEGGISNALAYAY
|A0A073KMY5|A0A073KMY5\_9GAMM|KETGA...EGATPRKVKKAVLGG|LMGG|IASVTA LKAKLPARIKDISEGGISNALAYAY
|A0KV76|FADJ\_SHESA|KETGA...EGATPRKVKKAVLGG|LMGG|IASVTA LKAKLPARIKDISEGGISNALAYAY
|A0A220UTH7|A0A220UTH7\_9GAMM|KETGA...EGATPRKVKKAVLGG|LMGG|IASVTA LKAKLPARIKDISEGGISNALAYAY
|A0A5B8R6W1|A0A5B8R6W1\_9GAMM|KETGA...EGATPRKVKKAVLGG|LMGG|IASVTA LKAKLPARIKDISEGGISNALAYAY
|V1DAI4|V1DAI4\_9GAMM|KETGA...EGATPRKVKKAVLGG|LMGG|IASVTA LKAKLPARIKDISEGGISNALAYAY
|A0A448CPQ4|A0A448CPQ4\_SHEPU|KETGA...EGATPRKVKKAVLGG|LMGG|IASVTA LKAKLPARIKDISEGGISNALAYAY
|A0A252ERQ3|A0A252ERQ3\_SHEPU|KETGA...EGATPRKVKKAVLGG|LMGG|IASVTA LKAKLPARIKDISEGGISNALAYAY
|Q0HKD1|FADJ\_SHESM|KETGA...EGATPRKVKKAVLGG|LMGG|IASVTA LKAKLPARIKDISEGGISNALAYAY
|QHWN3|FADJ\_SHESR|KETGA...EGATPRKVKKAVLGG|LMGG|IASVTA LKAKLPARIKDISEGGISNALAYAY
|F7RQE3|F7RQE3\_9GAMM|KETGA...EGATPRKVKKAVLGG|LMGG|IASVTA LKAKLPARIKDISEGGISNALAYAY
|B8EE98|B8EE98\_SHEB2|KETGA...EGASPRKVKKAVLGG|LMGG|IASVTA LKAKLPARIKDISEGGISNALAYAY
|A6WQ25|FADJ\_SHEB8|KETGA...EGASPRKVKKAVLGG|LMGG|IASVTA LKAKLPARIKDISEGGISNALAYAY
|A0A448EK41|A0A448EK41\_9GAMM|KETGA...EGASPRKVKKAVLGG|LMGG|IASVTA LKAKLPARIKDISEGGISNALAYAY
|A0A553JHX1|A0A553JHX1\_SHEHA|KESGA...GDAKPRTIKKVMVLLGG|LMGG|IASVTA LKAKLPARIKDISEGGISNALAYAY
|B8CPY6|B8CPY6\_SHEFW|KETGA...GDVEPRKVKAMVLLGG|LMGG|IASVTA LKAKLPARIKDISEGGISNALAYAY
|A0A431WFC4|A0A431WFC4\_9GAMM|KETGA...GDVEPRKVKAMVLLGG|LMGG|IASVTA LKAKLPARIKDISEGGISNALAYAY
|A8FTR7|A8FTR7\_SHESH|KETGA...GDVEPRKVKAMVLLGG|LMGG|IASVTA LKAKLPARIKDISEGGISNALAYAY
|A0A431WNL0|A0A431WNL0\_9GAMM|KETGA...GDVEPRKVKAMVLLGG|LMGG|IASVTA LKAKLPARIKDISEGGISNALAYAY
|A0A550AEC5|A0A550AEC5\_9GAMM|KETGA...GDVPRKVKKAMVLLGG|LMGG|IASVTA LKAKLPARIKDISEGGISNALAYAY
|A0A7L4WW90|A0A7L4WW90\_9GAMM|KETGA...GDVPRKVKKAMVLLGG|LMGG|IASVTA LKAKLPARIKDISEGGISNALAYAY
|A9DDU3|A9DDU3\_9GAMM|RETGA...GDVPRKVKKAMVLLGG|LMGG|IASVTA LKAKLPARIKDISEGGISNALAYAY
|A0A330M2B9|A0A330M2B9\_9GAMM|RETGA...GDVPRKVKKAMVLLGG|LMGG|IASVTA LKAKLPARIKDISEGGISNALAYAY
|A0A5N8UFC7|A0A5N8UFC7\_9GAMM|KETGA...GDVPRKVKKAMVLLGG|LMGG|IASVTA LKAKLPARIKDISEGGISNALAYAY
|A0A1S6HN57|A0A1S6HN57\_9GAMM|KETGA...GDVEPRKVNKAMVLLGG|LMGG|IASVTA LKAKLPARIKDISEGGISNALAYAY
|D4ZMH7|D4ZMH7\_SHEVD|KETGA...GDVPRKVNKAMVLLGG|LMGG|IASVTA LKAKLPARIKDISEGGISNALAYAY
|A0A3L8Q213|A0A3L8Q213\_9GAMM|KEA...GEAEIRLNLKAVVLLGG|LMGG|IAEYVTA AKAGLPARIKDISEGGISNALAYAY
|A0A3A6U4N9|A0A3A6U4N9\_9GAMM|KEA...GEANSKSVKAVVLLGG|LMGG|IASVTA LKAKLPARIKDISEGGISNALAYAY
|A0A4Q5MA37|A0A4Q5MA37\_9GAMM|KEA...GEADAKVNKAVVLLGG|LMGG|IASVTA LKAKLPARIKDISEGGISNALAYAY
|A0A1L6LSX5|A0A1L6LSX5\_9DELTA|KDSGVSDPSVKPRVVEKAVLGG|LMGG|IAYVTA MNAG\_IPVRLKDKDDASLGRGLKYVA
|A0A2W4L9B9|A0A2W4L9B9\_9PROT|KATGVADSNVRKPEVRSVAMLGG|LMGG|IAYVTA SAIAIG\_IPVRFKEDAEGLGRGFAVVR
|A0A2W4M4E6|A0A2W4M4E6\_9PROT|KDPGINEPVEKPEVHKVGLGG|LMGG|IAYVTA AAVAGLPVRLDRDEALGRGLAQIR
|A0A6I2GRX9|A0A6I2GRX9\_9DELTA|KENGTKNPEAKREVKRVAVLLGG|LMGG|IAYVTA SAVQVVPVRLKDKDDAGVGRAMKQVQ
|A0A0H4WMK2|A0A0H4WMK2\_9DELTA|KENGTSNPDAKPREVKKVAVLGG|LMGG|IAYVTA SVLQVVPVRLKDKDDAGVGRAMKQVQ
|F8CJ36|F8CJ36\_MYXFH|KENGTSNPDAKPREVKKVAVLGG|LMGG|IAYVTA SVLQVVPVRLKDKDDAGVGRAMKQVQ
|A0A250K0F1|A0A250K0F1\_9DELTA|KENGTSNPDAKPREVKKVAVLGG|LMGG|IAYVTA SVLQVVPVRLKDKDDAGVGRAMKQVQ
|A0A7Y6WFZ2|A0A7Y6WFZ2\_9DELTA|KENGTSNPDAKPREVKKVAVLGG|LMGG|IAYVTA SVLQVVPVRLKDKDDAGVGRAMKQVQ
|A0A7Y7C660|A0A7Y7C660\_9DELTA|KENGTSNPDAKPREVKKVAVLGG|LMGG|IAYVTA SVLQVVPVRLKDKDDAGVGRAMKQVQ
|A0A7Y4JFH2|A0A7Y4JFH2\_MYXXA|KENGTSNPDAKPREVKKVAVLGG|LMGG|IAYVTA SVLQVVPVRLKDKDDAGVGRAMKQVQ
|A0A4Y6CZQ9|A0A4Y6CZQ9\_MYXXA|KENGTSNPDAKPREVKKVAVLGG|LMGG|IAYVTA SVLQVVPVRLKDKDDAGVGRAMKQVQ

|               |                  |                                  |                                      |
|---------------|------------------|----------------------------------|--------------------------------------|
| tr A0A7Y4IKV5 | A0A7Y4IKV5_MYXXA | KENGTSNPDAKPREVKKVAVLGGGLMGGG    | IAYVTSVLQGVVVRVKDKDDAGVGRAMKQVQ      |
| tr A0A511HHB0 | A0A511HHB0_9DELT | KENGTSNPDAKPREVKKVAVLGGGLMGGG    | IAYVTSVLQGVVVRVKDKDDAGVGRAMKQVQ      |
| tr A0A4Y6CKY7 | A0A4Y6CKY7_MYXXA | KENGTSNPDAKPREVKKVAVLGGGLMGGG    | IAYVTSVLQGVVVRVKDKDDAGVGRAMKQVQ      |
| tr Q1D1F2     | Q1D1F2_MYXXD     | KENGTSNPDAKPREVKKVAVLGGGLMGGG    | IAYVTSVLQGVVVRVKDKDDAGVGRAMKQVQ      |
| tr A0A7Y4MA14 | A0A7Y4MA14_MYXXA | KENGTSNPDAKPREVKKVAVLGGGLMGGG    | IAYVTSVLQGVVVRVKDKDDAGVGRAMKQVQ      |
| tr A0A7T8Y4N9 | A0A7T8Y4N9_MYXXA | KENGTSNPDAKPREVKKVAVLGGGLMGGG    | IAYVTSVLQGVVVRVKDKDDAGVGRAMKQVQ      |
| tr L7UE67     | L7UE67_MYXSD     | KENGTADASVKPREVKKVAVLGGGLMGGG    | IAYVAGVLQGAQVRVKDKDDAGAGRALKQVQ      |
| tr A0A511T9X1 | A0A511T9X1_MYXFU | KENGTSDASVKPREVKKVAVLGGGLMGGG    | IAYVAGVLQGAQVRVKDKDDAGVARALKQVQ      |
| tr A0A7Y7C9C4 | A0A7Y7C9C4_9DELT | KENGTADASVKPREVKKVAVLGGGLMGGG    | IAYVAGVLQGVVVRVKDKDDAGTSRALKQVQ      |
| tr A0A540X7W8 | A0A540X7W8_9DELT | KENGTADASVKPREVKKVAVLGGGLMGGG    | IAYVAGVLQGAQVRVKDKDDAGASRAMKQVQ      |
| tr A0A3A8FK19 | A0A3A8FK19_9DELT | KENGTANPSVKAREVKKVAVLGGGLMGGG    | IAYVSALQGVVHVRVKDKDDAGAGRALKQVQ      |
| tr A0A3A8JQL9 | A0A3A8JQL9_9DELT | KENGTANASVKAREVKKVAVLGGGLMGGG    | IAYVAGVLQGVVVRVKDRDDAGAGRALKQVQ      |
| tr A0A7Y4NFA4 | A0A7Y4NFA4_9DELT | KENGTANATVKPREVKKVAVLGGGLMGGG    | IAYVAGVLQGVVVRVKDRDDAGAGRALKQVQ      |
| tr A0A3A8HDQ7 | A0A3A8HDQ7_9DELT | KENGTANASVKPREVKKVAVLGGGLMGGG    | IAYVAGVLQGVVVRVKDRDDAGAGRALKQVQ      |
| tr A0A3A8GR90 | A0A3A8GR90_9DELT | KENGTSNPNLKPREEVKKVAVLGGGLMGGG   | IAYVAGVLQGVVVRVKDRDDAGAGRALKQVQ      |
| tr A0A3A8SBD7 | A0A3A8SBD7_9DELT | KENGTSNPNLKPREEVKKVAVLGGGLMGGG   | IAYVAGVLQGVVVRVKDRDDAGAGRALKQVQ      |
| tr A0A3A8T0I8 | A0A3A8T0I8_9DELT | KENGTSNPNLKPREEVKKVAVLGGGLMGGG   | IAYVAGVLQGVVVRVKDRDDAGAGRALKQVQ      |
| tr A0A7X5BU07 | A0A7X5BU07_9DELT | KENGTSNPNLKPREEVKKVAVLGGGLMGGG   | IAYVAGVLQGVVVRVKDRDDAGAGRALKQVQ      |
| tr A0A7Y1RVL2 | A0A7Y1RVL2_9DELT | KENGTSNPNLKPREEVKKVAVLGGGLMGGG   | IAYVAGVLQGVVVRVKDRDDAGAGRALKQVQ      |
| tr A0A3A8THN2 | A0A3A8THN2_9DELT | KENGTSNPNLKPREEVKKVAVLGGGLMGGG   | IAYVAGVLQGVVVRVKDRDDAGAGRALKQVQ      |
| tr A0A7Y1RX76 | A0A7Y1RX76_9DELT | KENGTSNPNLKPREEVKKVAVLGGGLMGGG   | IAYVAGVLQGVVVRVKDRDDAGAGRALKQVQ      |
| tr A0A3A8RA58 | A0A3A8RA58_9DELT | KENGTANPNLKPREEVKKVAVLGGGLMGGG   | IAYVAGVLQGVVVRVKDKDDAGAGRALKQVQ      |
| tr A0A410RPB6 | A0A410RPB6_CORCK | KENGTANPNLKPREEVKKVAVLGGGLMGGG   | IAYVAGVLQGVVVRVKDRDDAGAGRALKQVQ      |
| tr A0A7Y4J474 | A0A7Y4J474_CORCK | KENGTSNPNLKPREEVKKVAVLGGGLMGGG   | IAYVAGVLQGVVVRVKDRDDAGAGRALKQVQ      |
| tr A0A3A8I9Z6 | A0A3A8I9Z6_9DELT | KENGTSNPNLKPREEVKKVAVLGGGLMGGG   | IAYVAGVLQGVVVRVKDRDDAGAGRALKQVQ      |
| tr H8MKE9     | H8MKE9_CORCM     | KENGTANPNLKPREEVKKVAVLGGGLMGGG   | IAYVAGVLQGVVVRVKDRDDAGAGRALKQVQ      |
| tr A0A3A8H102 | A0A3A8H102_9DELT | KENGTSNPNLKPREEVKKVAVLGGGLMGGG   | IAYVAGVLQGVVVRVKDRDDAGAGRALKQVQ      |
| tr A0A554FW33 | A0A554FW33_9DELT | KENGTANPSVKPREVKKVAVLGGGLMGGG    | IAYVAGVLQGVVVRVKDKDDAGAGRALKQVQ      |
| tr A0A3A8NPC0 | A0A3A8NPC0_9DELT | KENGTANPSVKPREVKKVAVLGGGLMGGG    | IAYVAGVLQGVVVRVKDRDDAGAGRALKQVQ      |
| tr A0A3A8JUV3 | A0A3A8JUV3_9DELT | KENGTANPSVKPREVKKVAVLGGGLMGGG    | IAYVAGVLQGVVVRVKDRDDAGAGRALKQVQ      |
| tr A0A3A8NEX6 | A0A3A8NEX6_9DELT | KENGTANPSVKPREVKKVAVLGGGLMGGG    | IAYVAGVLQGVVVRVKDRDDAGAGRALKQVQ      |
| tr A0A3A8JEU8 | A0A3A8JEU8_9DELT | KENGTANANVKPREVKKVAVLGGGLMGGG    | IAYVAGVLQGVVVRVKDKDDAGAGRALKQVQ      |
| tr A0A3A8LI76 | A0A3A8LI76_9DELT | KENGTANASVKPREVKKVAVLGGGLMGGG    | IAYVAGVLQGVVVRVKDKDDAGAGRALKQVQ      |
| tr A0A085WXN8 | A0A085WXN8_9DELT | KENGTSDPSVMPREEVKKVAVLGGGLMGGG   | IAYVSAALQGVVVRVKDKDDAGVGRALKQVQ      |
| tr A0A2T4V0M5 | A0A2T4V0M5_9DELT | KENGTANADVVKPREVKKVAVLGGGLMGGG   | IAYVSSALQGVVVRVKDKDDAGVGRALKQVQ      |
| tr A0A0G2ZSW5 | A0A0G2ZSW5_9DELT | KENGTASADVVKPREVKKVAVLGGGLMGGG   | IAYVSSALQGVVVRVKDKDDAGVGRALKQVQ      |
| tr A0A3M2DKY0 | A0A3M2DKY0_9DELT | KDSGVDDPSVPEPRVDDKVGVLGAGLMGAG   | IAYVNSAVAGVVRTIRIKDKDDAGVGRGLAYIR    |
| tr A0A661NQ58 | A0A661NQ58_9DELT | KDSGVDDDEKVTARPVTIKVGMGLGAGLMGAG | IAYVTSIAKVPVRIKDRDHDGVLRLGLRYVR      |
| tr A0A520YD99 | A0A520YD99_9DELT | KDSGVDDPNVEPREVNVKVGMLGAGLMGAG   | IAYVTTAVAKIPVRLKDRDADGVMMAGLRYVR     |
| tr A0A7Y3BRE4 | A0A7Y3BRE4_9DELT | KDSGVDDPNVEPREVNVKVGMLGAGLMGAG   | IAYVTTAVAKIPVRLKDRDADGVMMAGLRYVR     |
| tr A0A2D9TF90 | A0A2D9TF90_9DELT | KDSGVDDPSVKPREVQRLGMLGAGLMGAG    | IAYVTTATIAKPPVRLKDRDAKVLWGLRYVR      |
| tr A0A2E0TP32 | A0A2E0TP32_9DELT | KDSGVDDPEVKPREVSHVGMGLGAGLMGAG   | IAYVTTALAKTPVRLKDRDADGVLISGLQYVR     |
| tr A0A2E4Y3V1 | A0A2E4Y3V1_9PROT | KNR...YGSPEPKPDWIGVIGGLMCSG      | ISLVNIQKG.IKTRLKDLDSQESLGGKSEKYVW    |
| tr A0A2E6VRH4 | A0A2E6VRH4_9DELT | KNR...FGKPDHAVKTLGILGAGLMGAG     | IGLVSVQKG.TRVLLKDISQENLGGKGGKIY      |
| tr A0A1F9FB59 | A0A1F9FB59_9DELT | KNR...FGKAAATPLDTLGLLGA          | GLMCAIIEVTVQKG.VRVLLKDVSAEALARGQKTIW |



ECHA\_HUMAN

00000000

00000000

0000

450

0000000000

410 420 430 440 450 460

ECHA\_HUMAN

|                  |                   |                                               |      |       |            |
|------------------|-------------------|-----------------------------------------------|------|-------|------------|
| tr A0A4R6XLA8    | A0A4R6XLA8_9GAMM  | KG LNDKVVKKALTSF ERDSIFSNLTGQLDY QGF EKAD MVI | EAVF | EDLSL | KHRVLKVEE  |
| tr A0A6A01JT2    | A0A6A01JT2_9BACT  | TDFNQLVKKKAMGVV ERDRLMSKVKATTA                | EAVF | EDIDL | KQNILADVE  |
| tr A0A7V3QZU7    | A0A7V3QZU7_9BACT  | SGLEKRRRSGALTRLARDRQWFGLLATTD                 | EAVF | EDLAL | KRKKVLAECE |
| tr A0A7V4SYJ6    | A0A7V4SYJ6_9BACT  | SGLSKRVQSGAITSRF ERDRFLSRHLHTE                | EAVF | EDLDD | KRQVLAECV  |
| tr A0A2A8D2N6    | A0A2A8D2N6_9BACT  | EGLSKQVKSGAVTRFERDQLIWARLTPSLD                | EAVF | EDLAL | KRKKVLAETE |
| tr A0A2N1TGP0    | A0A2N1TGP0_9SPIR  | KAMNKKSDRRRISFEFRDQIVERTVTGDY                 | EAVF | EDLDD | KRSILSDTE  |
| tr A0A1G3QGW4    | A0A1G3QGW4_9SPIR  | KG LDKRRSRS GALT PFERDQVQYGVK VPCDD           | EAVF | EDITL | KRKKVLRVE  |
| tr A0A1G3QTY3    | A0A1G3QTY3_9SPIR  | KG IASQVKS GAVRKF DGDV MYGKLVPCDD             | EAVF | EDLSL | KRKKILKDE  |
| tr A0A7X9L359    | A0A7X9L359_9DELT  | KG I VQVQSSGAVRRFDGDV MYGKLVPCDD              | EAVF | EDINL | KRTILKEAE  |
| tr A0A522CJY0    | A0A522CJY0_9SPIR  | KG LDKRRSRS GALT PFERDQVQYGVK VPCDD           | EAVF | EDLAL | KRRLLAECV  |
| tr A0A2N1RRJ3    | A0A2N1RRJ3_9SPIR  | KG I VQVQSSGAVRRFDGDV MYGKLVPCDD              | EAVF | EDLAL | KRRLLAECV  |
| tr A0A2N2KFN7    | A0A2N2KFN7_9DELT  | KG LSKRAESGAIFFPF ERDQVGRVLPVPCDD             | EAVF | EDLAL | KRKLSDVE   |
| tr A0A1V6AXX9    | A0A1V6AXX9_9DELT  | KG LDKRRSRS GALT PFERDQVQYGVK VPCDD           | EAVF | EDLAL | KRRLSDVE   |
| tr A0A2N2HZL0    | A0A2N2HZL0_9DELT  | KG LDKRRSRS GALT PFERDQVQYGVK VPCDD           | EAVF | EDLAL | KRRLSDVE   |
| tr A0A5E8ARP3    | A0A5E8ARP3_9BACT  | KG LDKRRSRS GALT PFERDQVQYGVK VPCDD           | EAVF | EDLAL | KRRLSDVE   |
| tr A0A662A7B1    | A0A662A7B1_9BACT  | KG LDKRRSRS GALT PFERDQVQYGVK VPCDD           | EAVF | EDLAL | KRRLSDVE   |
| tr D7CV161D7CV16 | TRURR             | KG LDKRRSRS GALT PFERDQVQYGVK VPCDD           | EAVF | EDLAL | KRRLSDVE   |
| tr A0A3C2AKX4    | A0A3C2AKX4_9FLAO  | KG LDKRRSRS GALT PFERDQVQYGVK VPCDD           | EAVF | EDLAL | KRRLSDVE   |
| tr A0A3B8ZLN3    | A0A3B8ZLN3_9PLAN  | KG LDKRRSRS GALT PFERDQVQYGVK VPCDD           | EAVF | EDLAL | KRRLSDVE   |
| tr A0A345UGV8    | A0A345UGV8_9BACT  | KG LDKRRSRS GALT PFERDQVQYGVK VPCDD           | EAVF | EDLAL | KRRLSDVE   |
| tr A0A6C1P6A2    | A0A6C1P6A2_9BACT  | KG LDKRRSRS GALT PFERDQVQYGVK VPCDD           | EAVF | EDLAL | KRRLSDVE   |
| tr A0A3MLX9W8    | A0A3MLX9W8_9BACT  | KG LDKRRSRS GALT PFERDQVQYGVK VPCDD           | EAVF | EDLAL | KRRLSDVE   |
| tr A0A354C796    | A0A354C796_9DELT  | KG LDKRRSRS GALT PFERDQVQYGVK VPCDD           | EAVF | EDLAL | KRRLSDVE   |
| tr A0A3M1NUM8    | A0A3M1NUM8_9BACT  | KG LDKRRSRS GALT PFERDQVQYGVK VPCDD           | EAVF | EDLAL | KRRLSDVE   |
| tr A0A3M2KRC8    | A0A3M2KRC8_9BACT  | KG LDKRRSRS GALT PFERDQVQYGVK VPCDD           | EAVF | EDLAL | KRRLSDVE   |
| tr A0A5S91THR0   | A0A5S91THR0_9BACT | KG LDKRRSRS GALT PFERDQVQYGVK VPCDD           | EAVF | EDLAL | KRRLSDVE   |
| tr A0A6M1ST81    | A0A6M1ST81_9BACT  | KG LDKRRSRS GALT PFERDQVQYGVK VPCDD           | EAVF | EDLAL | KRRLSDVE   |
| tr A0A521AAE5    | A0A521AAE5_9BACT  | KG LDKRRSRS GALT PFERDQVQYGVK VPCDD           | EAVF | EDLAL | KRRLSDVE   |
| tr A0A1M4ZMD6    | A0A1M4ZMD6_9BACT  | KG LDKRRSRS GALT PFERDQVQYGVK VPCDD           | EAVF | EDLAL | KRRLSDVE   |
| tr A0A2A2GCS2    | A0A2A2GCS2_9BACT  | KG LDKRRSRS GALT PFERDQVQYGVK VPCDD           | EAVF | EDLAL | KRRLSDVE   |
| tr A0A5D3YIH7    | A0A5D3YIH7_9BACT  | KG LDKRRSRS GALT PFERDQVQYGVK VPCDD           | EAVF | EDLAL | KRRLSDVE   |
| tr A0A6M1T9G0    | A0A6M1T9G0_9BACT  | KG LDKRRSRS GALT PFERDQVQYGVK VPCDD           | EAVF | EDLAL | KRRLSDVE   |
| tr A0A6A8Q1Y8    | A0A6A8Q1Y8_9BACT  | KG LDKRRSRS GALT PFERDQVQYGVK VPCDD           | EAVF | EDLAL | KRRLSDVE   |
| tr A0A521BVJ3    | A0A521BVJ3_9BACT  | KG LDKRRSRS GALT PFERDQVQYGVK VPCDD           | EAVF | EDLAL | KRRLSDVE   |
| tr A0A359E0Y8    | A0A359E0Y8_9BACT  | KG LDKRRSRS GALT PFERDQVQYGVK VPCDD           | EAVF | EDLAL | KRRLSDVE   |
| tr A0A2D8CIM6    | A0A2D8CIM6_9BACT  | KG LDKRRSRS GALT PFERDQVQYGVK VPCDD           | EAVF | EDLAL | KRRLSDVE   |
| tr A0A2D9FWF5    | A0A2D9FWF5_9BACT  | KG LDKRRSRS GALT PFERDQVQYGVK VPCDD           | EAVF | EDLAL | KRRLSDVE   |
| tr A0A1B6YB70    | A0A1B6YB70_9BACT  | KG LDKRRSRS GALT PFERDQVQYGVK VPCDD           | EAVF | EDLAL | KRRLSDVE   |
| tr A0A2D4ZTC0    | A0A2D4ZTC0_9BACT  | KG LDKRRSRS GALT PFERDQVQYGVK VPCDD           | EAVF | EDLAL | KRRLSDVE   |
| tr A0A3D4UVW7    | A0A3D4UVW7_9BACT  | KG LDKRRSRS GALT PFERDQVQYGVK VPCDD           | EAVF | EDLAL | KRRLSDVE   |
| tr A0A3F313M2    | A0A3F313M2_9BACT  | KG LDKRRSRS GALT PFERDQVQYGVK VPCDD           | EAVF | EDLAL | KRRLSDVE   |
| tr A0A3D1G7L9    | A0A3D1G7L9_9BACT  | KG LDKRRSRS GALT PFERDQVQYGVK VPCDD           | EAVF | EDLAL | KRRLSDVE   |
| tr A0A3M8G1Y8    | A0A3M8G1Y8_9BACT  | KG LDKRRSRS GALT PFERDQVQYGVK VPCDD           | EAVF | EDLAL | KRRLSDVE   |
| tr A0A5Q4F391    | A0A5Q4F391_9BACT  | KG LDKRRSRS GALT PFERDQVQYGVK VPCDD           | EAVF | EDLAL | KRRLSDVE   |
| tr A0A6I7NPV0    | A0A6I7NPV0_9BACT  | KG LDKRRSRS GALT PFERDQVQYGVK VPCDD           | EAVF | EDLAL | KRRLSDVE   |
| tr A0A651G1J2    | A0A651G1J2_9BACT  | KG LDKRRSRS GALT PFERDQVQYGVK VPCDD           | EAVF | EDLAL | KRRLSDVE   |
| tr A0A371QRK5    | A0A371QRK5_9BACT  | KG LDKRRSRS GALT PFERDQVQYGVK VPCDD           | EAVF | EDLAL | KRRLSDVE   |
| tr A0A2N0VGJ5    | A0A2N0VGJ5_9BACT  | KG LDKRRSRS GALT PFERDQVQYGVK VPCDD           | EAVF | EDLAL | KRRLSDVE   |
| tr A0A316TYJ0    | A0A316TYJ0_9BACT  | KG LDKRRSRS GALT PFERDQVQYGVK VPCDD           | EAVF | EDLAL | KRRLSDVE   |
| tr A0A651GLZ8    | A0A651GLZ8_9BACT  | KG LDKRRSRS GALT PFERDQVQYGVK VPCDD           | EAVF | EDLAL | KRRLSDVE   |
| tr A0A7Y5V3S5    | A0A7Y5V3S5_9BACT  | KG LDKRRSRS GALT PFERDQVQYGVK VPCDD           | EAVF | EDLAL | KRRLSDVE   |
| tr A0A7W1SHC0    | A0A7W1SHC0_9BACT  | KG LDKRRSRS GALT PFERDQVQYGVK VPCDD           | EAVF | EDLAL | KRRLSDVE   |
| tr A0A7Y5PBT7    | A0A7Y5PBT7_9BACT  | KG LDKRRSRS GALT PFERDQVQYGVK VPCDD           | EAVF | EDLAL | KRRLSDVE   |
| tr A0A7Y5TXL8    | A0A7Y5TXL8_9BACT  | KG LDKRRSRS GALT PFERDQVQYGVK VPCDD           | EAVF | EDLAL | KRRLSDVE   |
| tr A0A423PQ96    | A0A423PQ96_9GAMM  | KG LDKRRSRS GALT PFERDQVQYGVK VPCDD           | EAVF | EDLAL | KRRLSDVE   |
| tr U2G066 U2G066 | 9GAMM             | KG LDKRRSRS GALT PFERDQVQYGVK VPCDD           | EAVF | EDLAL | KRRLSDVE   |
| tr A0A2E0J1F4    | A0A2E0J1F4_9GAMM  | KG LDKRRSRS GALT PFERDQVQYGVK VPCDD           | EAVF | EDLAL | KRRLSDVE   |
| tr A0A2D4SCM8    | A0A2D4SCM8_9GAMM  | KG LDKRRSRS GALT PFERDQVQYGVK VPCDD           | EAVF | EDLAL | KRRLSDVE   |
| tr L0WJH1 L0WJH1 | 9GAMM             | KG LDKRRSRS GALT PFERDQVQYGVK VPCDD           | EAVF | EDLAL | KRRLSDVE   |
| tr A0A1H5XF61    | A0A1H5XF61_9GAMM  | KG LDKRRSRS GALT PFERDQVQYGVK VPCDD           | EAVF | EDLAL | KRRLSDVE   |
| tr A0A2E9TS48    | A0A2E9TS48_9GAMM  | KG LDKRRSRS GALT PFERDQVQYGVK VPCDD           | EAVF | EDLAL | KRRLSDVE   |
| tr A0A095UE19    | A0A095UE19_9GAMM  | KG LDKRRSRS GALT PFERDQVQYGVK VPCDD           | EAVF | EDLAL | KRRLSDVE   |
| tr A0A7G2S9A0    | A0A7G2S9A0_9GAMM  | KG LDKRRSRS GALT PFERDQVQYGVK VPCDD           | EAVF | EDLAL | KRRLSDVE   |
| tr B5JU27 B5JU27 | 9GAMM             | KG LDKRRSRS GALT PFERDQVQYGVK VPCDD           | EAVF | EDLAL | KRRLSDVE   |
| tr A0A1Y0IHP1    | A0A1Y0IHP1_9GAMM  | KG LDKRRSRS GALT PFERDQVQYGVK VPCDD           | EAVF | EDLAL | KRRLSDVE   |
| tr A0A316PZ14    | A0A316PZ14_9GAMM  | KG LDKRRSRS GALT PFERDQVQYGVK VPCDD           | EAVF | EDLAL | KRRLSDVE   |
| tr A0A498C231    | A0A498C231_9GAMM  | KG LDKRRSRS GALT PFERDQVQYGVK VPCDD           | EAVF | EDLAL | KRRLSDVE   |
| tr Q0A6T4 Q0A6T4 | ALKEH             | KG LDKRRSRS GALT PFERDQVQYGVK VPCDD           | EAVF | EDLAL | KRRLSDVE   |
| tr A0A3E0WL10    | A0A3E0WL10_9GAMM  | KG LDKRRSRS GALT PFERDQVQYGVK VPCDD           | EAVF | EDLAL | KRRLSDVE   |
| tr A0A3S1BU16    | A0A3S1BU16_9GAMM  | KG LDKRRSRS GALT PFERDQVQYGVK VPCDD           | EAVF | EDLAL | KRRLSDVE   |
| tr A0A7V8QFN9    | A0A7V8QFN9_9GAMM  | KG LDKRRSRS GALT PFERDQVQYGVK VPCDD           | EAVF | EDLAL | KRRLSDVE   |
| tr A0A1H8PPF9    | A0A1H8PPF9_9GAMM  | KG LDKRRSRS GALT PFERDQVQYGVK VPCDD           | EAVF | EDLAL | KRRLSDVE   |
| tr A0A6H0J0V7    | A0A6H0J0V7_9GAMM  | KG LDKRRSRS GALT PFERDQVQYGVK VPCDD           | EAVF | EDLAL | KRRLSDVE   |
| tr V5EZK6 V5EZK6 | 9VIBR             | KG LDKRRSRS GALT PFERDQVQYGVK VPCDD           | EAVF | EDLAL | KRRLSDVE   |
| tr A0A6I1QBM2    | A0A6I1QBM2_9VIBR  | KG LDKRRSRS GALT PFERDQVQYGVK VPCDD           | EAVF | EDLAL | KRRLSDVE   |
| tr A0A511QRL5    | A0A511QRL5_9VIBR  | KG LDKRRSRS GALT PFERDQVQYGVK VPCDD           | EAVF | EDLAL | KRRLSDVE   |
| tr A0A7Y0JZP4    | A0A7Y0JZP4_9VIBR  | KG LDKRRSRS GALT PFERDQVQYGVK VPCDD           | EAVF | EDLAL | KRRLSDVE   |
| tr A0A193KD24    | A0A193KD24_9VIBR  | KG LDKRRSRS GALT PFERDQVQYGVK VPCDD           | EAVF | EDLAL | KRRLSDVE   |
| tr A0A1S1HM72    | A0A1S1HM72_PROST  | KG LDKRRSRS GALT PFERDQVQYGVK VPCDD           | EAVF | EDLAL | KRRLSDVE   |
| tr A0A7T8I613    | A0A7T8I613_9GAMM  | KG LDKRRSRS GALT PFERDQVQYGVK VPCDD           | EAVF | EDLAL | KRRLSDVE   |
| tr A0A140NIF0    | A0A140NIF0_PROSM  | KG LDKRRSRS GALT PFERDQVQYGVK VPCDD           | EAVF | EDLAL | KRRLSDVE   |
| tr A0A379GMB7    | A0A379GMB7_PROST  | KG LDKRRSRS GALT PFERDQVQYGVK VPCDD           | EAVF | EDLAL | KRRLSDVE   |
| tr A0A379H393    | A0A379H393_PROST  | KG LDKRRSRS GALT PFERDQVQYGVK VPCDD           | EAVF | EDLAL | KRRLSDVE   |
| tr B2Q0L5 B2Q0L5 | PROST             | KG LDKRRSRS GALT PFERDQVQYGVK VPCDD           | EAVF | EDLAL | KRRLSDVE   |
| tr A0A6I3JUE9    | A0A6I3JUE9_9GAMM  | KG LDKRRSRS GALT PFERDQVQYGVK VPCDD           | EAVF | EDLAL | KRRLSDVE   |
| tr A0A7D4P594    | A0A7D4P594_YERMW  | KG LDKRRSRS GALT PFERDQVQYGVK VPCDD           | EAVF | EDLAL | KRRLSDVE   |
| tr A0A7U7IVK6    | A0A7U7IVK6_YEREN  | KG LDKRRSRS GALT PFERDQVQYGVK VPCDD           | EAVF | EDLAL | KRRLSDVE   |
| tr A0A447RIF5    | A0A447RIF5_YEREN  | KG LDKRRSRS GALT PFERDQVQYGVK VPCDD           | EAVF | EDLAL | KRRLSDVE   |
| tr A0A7H4ZLV9    | A0A7H4ZLV9_YERP4  | KG LDKRRSRS GALT PFERDQVQYGVK VPCDD           | EAVF | EDLAL | KRRLSDVE   |
| tr A0A0H3NX46    | A0A0H3NX46_YERE1  | KG LDKRRSRS GALT PFERDQVQYGVK VPCDD           | EAVF | EDLAL | KRRLSDVE   |
| tr A0A7T9XUV7    | A0A7T9XUV7_YEREN  | KG LDKRRSRS GALT PFERDQVQYGVK VPCDD           | EAVF | EDLAL | KRRLSDVE   |
| tr A0A7U7IYV8    | A0A7U7IYV8_YEREN  | KG LDKRRSRS GALT PFERDQVQYGVK VPCDD           | EAVF | EDLAL | KRRLSDVE   |
| tr A0A0H5G7G2    | A0A0H5G7G2_YEREN  | KG LDKRRSRS GALT PFERDQVQYGVK VPCDD           | EAVF | EDLAL | KRRLSDVE   |
| tr A0A2A7TDI2    | A0A2A7TDI2_YERKR  | KG LDKRRSRS GALT PFERDQVQYGVK VPCDD           | EAVF | EDLAL | KRRLSDVE   |
| tr A0A0T9M261    | A0A0T9M261_YERKR  | KG LDKRRSRS GALT PFERDQVQYGVK VPCDD           | EAVF | EDLAL | KRRLSDVE   |
| tr A0A0A0C6P1    | A0A0A0C6P1_PHOLU  | KG LDKRRSRS GALT PFERDQVQYGVK VPCDD           | EAVF | EDLAL | KRRLSDVE   |
| tr A0A329VG55    | A0A329VG55_9GAMM  | KG LDKRRSRS GALT PFERDQVQYGVK VPCDD           | EAVF | EDLAL | KRRLSDVE   |
| tr Q7N288 FADJ   | PHOLL             | KG LDKRRSRS GALT PFERDQVQYGVK VPCDD           | EAVF | EDLAL | KRRLSDVE   |
| tr A0A6L9JMX5    | A0A6L9JMX5_PHOLM  | KG LDKRRSRS GALT PFERDQVQYGVK VPCDD           | EAVF | EDLAL | KRRLSDVE   |
| tr A0A7X5HQ29    | A0A7X5HQ29_PHOLM  | KG LDKRRSRS GALT PFERDQVQYGVK VPCDD           | EAVF | EDLAL | KRRLSDVE   |
| tr A0A1C0U051    | A0A1C0U051_9GAMM  | KG LDKRRSRS GALT PFERDQVQYGVK VPCDD           | EAVF | EDLAL | KRRLSDVE   |
| tr A0A7X5QF62    | A0A7X5QF62_9GAMM  | KG LDKRRSRS GALT PFERDQVQYGVK VPCDD           | EAVF | EDLAL | KRRLSDVE   |

tr|A0A2D0KWM9|A0A2D0KWM9\_9GAMM DMLSKRVSRRLTSSERSRQMSLLSGTDDYSGFKQADIVVEAVEEDLVLKRMVAEVE..

tr|A0A2D0LAI1|A0A2D0LAI1\_9GAMM DMLSKRVSRRLTSSERSRQMSLLSGTDDYSGFKQADIVVEAVEEDLVLKRMVAEVE..

tr|A0A2D0IXC8|A0A2D0IXC8\_XENBU DLSKRVKQRRLLKPSERSRQMSLLSGTDDYSGFKQADIVVEAVEEDLVLKRMVSEIE..

tr|W1JAM5|W1JAM5\_9GAMM DLSKRVKQRRLLKPSERSRQMSLLSGTDDYSGFKQADIVVEAVEEDLVLKRMVSEIE..

tr|A0A3D9UED3|A0A3D9UED3\_9GAMM DLSKRVKQRRLLKPLECSRQMSLLSGTDDYSGFKQADIVVEAVEEDLVLKRMVSEIE..

tr|A0A1I3JCA9|A0A1I3JCA9\_9GAMM DDLTKRVKQRRLLKPSERSRQMSLLSGTDDYSGFKQADIVVEAVEEDLVLKRMVSEIE..

tr|A0A068QUL9|A0A068QUL9\_9GAMM DRLSKRVKQRRLLKSGERTRQMSLLSGTDDYSGFKQADIVVEAVEEDLVLKRMVAEIE..

tr|A0A0M0TCH6|A0A0M0TCH6\_9GAMM DLSKRVKQRRLLQSSERSRQMSLLTGTDDYSGFKQADIVVEAVEEDLVLKRMVAEIE..

tr|A0A1Q5U854|A0A1Q5U854\_9GAMM DLSKRVKQRRLLKSSERSRQMSLLTGTDDYSGFKQADIVVEAVEEDLVLKRMVAEIE..

tr|A0A2D0ISP1|A0A2D0ISP1\_9GAMM DLSKRVKQRRLLKSSERSRQMSLLTGTDDYSGFKQADIVVEAVEEDLVLKRMVAEIE..

tr|A0A1Q5TUI8|A0A1Q5TUI8\_9GAMM DLSKRVKQRRLLKSSERSHQMSLLTGTDDYSGFKQADIVVEAVEEDLVLKRMVAEIE..

tr|A0A2D0KJI7|A0A2D0KJI7\_9GAMM DLSKRVKQRRLLKSSERSHQMSLLTGTDDYSGFKQADIVVEAVEEDLVLKRMVAEIE..

tr|A0A1Y2SB97|A0A1Y2SB97\_9GAMM DLSKRVKQRRLLKSSERSHQMSLLTGTDDYSGFKQADIVVEAVEEDLVLKRMVAEIE..

tr|A0A1I5DWI7|A0A1I5DWI7\_9GAMM DLSKRVKQRRLLKSSERSRQMSLLTGTDDYSGFKQADIVVEAVEEDLVLKRMVSEIE..

tr|A0A1I7GWY6|A0A1I7GWY6\_9GAMM DLSKRVKQRRLLKPSERSRQMSLLTGTDDYSGFKQADIVVEAVEEDLVLKRMVSEIE..

tr|D3VKY8|D3VKY8\_XENNA DLSKRVKQRRLLKPSERSRQMSLLTGTDDYSGFKQADIVVEAVEEDLVLKRMVSEIE..

tr|A0A2G0Q6Q9|A0A2G0Q6Q9\_9GAMM DLSKRVKQRRLLKPSERSRQMSLLTGTDDYSGFKQADIVVEAVEEDLVLKRMVSEIE..

tr|A0A2D0JU24|A0A2D0JU24\_9GAMM DLSKRVKQRRLLKPSERSRQMSLLTGTDDYSGFKQADIVVEAVEEDLVLKRMVSEIE..

tr|A0A0J5FN38|A0A0J5FN38\_9GAMM DLSKRVKQRRLLKPSERSRQMSLLTGTDDYSGFKQADIVVEAVEEDLVLKRMVSEIE..

tr|A0A432XLD4|A0A432XLD4\_9GAMM DDLNKKVKKRHHMARAELATMLRLSGSLDYSGFKQADIVVEAVEEDLNLKQMVADV..

tr|A0A2D8HU84|A0A2D8HU84\_9GAMM ERLNKKVKKRHHMRAELEKTMMLMSGLDYSGFKQADIVVEAVEEDLNLKQMVADV..

tr|A0A656X1Q2|A0A656X1Q2\_9GAMM ERLNKKVKKRHHMRAELEKTMMLMSGLDYSGFKQADIVVEAVEEDLNLKQMVADV..

tr|A0A4Q1QH79|A0A4Q1QH79\_9GAMM ERLIKKVKRHHMRAEYEKTMMLMSGLDYSGFKQADIVVEAVEEDLNLKQMVADIE..

tr|A0A1G7LQE6|A0A1G7LQE6\_9GAMM ERLIKKVKRHHMRAEYEKTMMLMSGLDYSGFKQADIVVEAVEEDLNLKQMVADIE..

tr|A0A432YV67|A0A432YV67\_9GAMM ERLIKKVKRHHMRAEYEKTMMLMSGLDYSGFKQADIVVEAVEEDLNLKQMVADIE..

tr|A0A1J5N0P5|A0A1J5N0P5\_9GAMM DLDLKKLRRFVTRSELOQSKMNNLTGTVAYRGVKDVMVVEAVEEDLNLKQMVADV..

tr|A0A0D8D548|A0A0D8D548\_9GAMM DDLNKKVKKRFFMRHSEMQRQMSITGTVDYSGFKELDIVVEAVEEDLNLKQMVADV..

tr|A0A3E0TNM2|A0A3E0TNM2\_9GAMM DDLNKKVKKRFFMRHSEMQRQMSAITGTLVYSGFNADIVVEAVEEDLNLKQMVADV..

tr|A0A3E0UD67|A0A3E0UD67\_9GAMM DDLNKKVKKRFFMRHSEMQRQMSAITGTLVYSGFNADIVVEAVEEDLNLKQMVADV..

tr|A0A3E0U0P4|A0A3E0U0P4\_9GAMM DDLNKKVKKRFFMRHSEMQRQMSAITGTLVYSGFNADIVVEAVEEDLNLKQMVADV..

tr|A0A0M2V8B1|A0A0M2V8B1\_9GAMM KLLKFKKRRFVTSKAEMQQLLLLTGTDDYSGFKADIVVEAVEEDLNLKQMVADIE..

tr|A0A285ITY5|A0A285ITY5\_9GAMM DDLQKFKKRRFVTSKAEMQQLLLLTGTDDYSGFKADIVVEAVEEDLNLKQMVADIE..

tr|A0A486XTB9|A0A486XTB9\_9GAMM SLLKFKKRRFVITKAQMQLLLMTGTDDYSGFKADIVVEAVEEDLNLKQMVADIE..

tr|I1E1G1|I1E1G1\_9GAMM SLLKFKKRRFVITKAEMQQLLLLTGTDDYSGFKADIVVEAVEEDLNLKQMVADIE..

tr|A0A1H6KJ68|A0A1H6KJ68\_9GAMM SLLKFKKRRFVITKAEMQQLLLLTGTDDYSGFKADIVVEAVEEDLNLKQMVADIE..

tr|A0A0X3Y764|A0A0X3Y764\_9GAMM SLLKFKKRRFVITKAEMQQLLLLTGTDDYSGFKADIVVEAVEEDLNLKQMVADIE..

tr|A0A2N1YEV4|A0A2N1YEV4\_9GAMM SLLKFKKRRFVITKAEMQQLLLLTGTDDYSGFKADIVVEAVEEDLNLKQMVADIE..

tr|A0A3P3QCM3|A0A3P3QCM3\_9GAMM SLLKFKKRRFVITKAEMQQLLLLTGTDDYSGFKADIVVEAVEEDLNLKQMVADIE..

tr|F7NT72|F7NT72\_9GAMM SLLKFKKRRFVITKAEMQQLLLLTGTDDYSGFKADIVVEAVEEDLNLKQMVADIE..

tr|A0A3S2TW63|A0A3S2TW63\_9GAMM SLLKFKKRRFVITKAEMQQLLLLTGTDDYSGFKADIVVEAVEEDLNLKQMVADIE..

tr|A0A3D5BGW7|A0A3D5BGW7\_9GAMM SLLNKKFKRRYVSRTELOQSKMNNLTGTVAYRGVKDVMVVEAVEEDLNLKQMVADIE..

tr|A0A5C7TI17|A0A5C7TI17\_9GAMM SLLNKKFKRRYVSRTELOQSKMNNLTGTVAYRGVKDVMVVEAVEEDLNLKQMVADIE..

tr|A0A0U4W982|A0A0U4W982\_9GAMM SLLNKKFKRRYVSKTELOQSKMNNLTGTVAYRGVKDVMVVEAVEEDLNLKQMVADIE..

tr|A0A2I0FCM2|A0A2I0FCM2\_9GAMM DDLNKKVKKRFFMKAEMQQLAMITGTTEYTGKVSADIVVEAVEEDLNLKQMVADIE..

tr|A0A2G2IVL1|A0A2G2IVL1\_9GAMM DDLNKKVKKRFFMKAEMQQLAMITGTTEYTGKVSADIVVEAVEEDLNLKQMVADIE..

tr|A6FT21|A6FT21\_9GAMM DDLNKKVKKRFFMKAEMQQLAMITGTTEYTGKVSADIVVEAVEEDLNLKQMVADIE..

tr|A0A4U1BNR2|A0A4U1BNR2\_9GAMM KQLDKGKRRHMTSAARDNLMALMTTTEYKGVKADIVVEAVEEDLNLKQMVADIE..

tr|E1SQ60|E1SQ60\_FERBD KQVDKRVKRRHTPAQRDMSLLTGTDDYSGFKADIVVEAVEEDLNLKQMVADIE..

tr|A0A4Y6IZ09|A0A4Y6IZ09\_9GAMM KLLAKGVKRRHMTPAVRDNLMLMTTTEYKGIKADIVVEAVEEDLNLKQMVADIE..

tr|A0A0C3QSZ7|A0A0C3QSZ7\_9GAMM KLLAKGVKRRHMTPAVRDNLMLMTTTEYKGIKADIVVEAVEEDLNLKQMVADIE..

tr|A0A6L7HXW0|A0A6L7HXW0\_9GAMM KLLAKGVKRRHMTPAVRDNLMLMTTTEYKGIKADIVVEAVEEDLNLKQMVADIE..

sp|A3QFP3|FADJ\_SHELP KLLAKGVKRRHMTPAVRDNLMLMTTTEYKGIKADIVVEAVEEDLNLKQMVADIE..

tr|A0A1E5IXH7|A0A1E5IXH7\_SHECO KLLAKGVKRRHMTSAARDNLMALMTTTEYKGIKADIVVEAVEEDLNLKQMVADIE..

tr|A0A411PKQ0|A0A411PKQ0\_9GAMM KLLAKGVKRRHMTPAVRDNLMLMTTTEYKGIKADIVVEAVEEDLNLKQMVADIE..

tr|A0A6G9QKM3|A0A6G9QKM3\_9GAMM KLLDKGVKRRHMTPAVRDNLMLMTTTEYKGIKADIVVEAVEEDLNLKQMVADIE..

tr|A0A6P1UL63|A0A6P1UL63\_9GAMM KLLDKGVKRRHMTPAVRDNLMLMTTTEYKGIKADIVVEAVEEDLNLKQMVADIE..

tr|A0A2N1ERI9|A0A2N1ERI9\_9GAMM KLLDKGVKRRHMTPAVRDNLMLMTTTEYKGIKADIVVEAVEEDLNLKQMVADIE..

tr|A0A7W4FU55|A0A7W4FU55\_9GAMM KLLDKGVKRRHMTPAVRDNLMLMTTTEYKGIKADIVVEAVEEDLNLKQMVADIE..

sp|Q8ECP7|FADJ\_SHEON KLLDKGVKRRHMTPAVRDNLMLMTTTEYKGIKADIVVEAVEEDLNLKQMVADIE..

tr|A0A501XZY8|A0A501XZY8\_9GAMM KLLDKGVKRRHMTPAVRDNLMLMTTTEYKGIKADIVVEAVEEDLNLKQMVADIE..

tr|A0A2W5DCZ0|A0A2W5DCZ0\_SHEOE KLLDKGVKRRHMTPAVRDNLMLMTTTEYKGIKADIVVEAVEEDLNLKQMVADIE..

tr|A0A1E3V3C8|A0A1E3V3C8\_9GAMM KLLDKGVKRRHMTPAVRDNLMLMTTTEYKGIKADIVVEAVEEDLNLKQMVADIE..

tr|A0A1Z4AI20|A0A1Z4AI20\_9GAMM KLLDKGVKRRHMTPAVRDNLMLMTTTEYKGIKADIVVEAVEEDLNLKQMVADIE..

tr|A0A7X9LJL9|A0A7X9LJL9\_9GAMM KLLDKGVKRRHMTPAVRDNLMLMTTTEYKGIKADIVVEAVEEDLNLKQMVADIE..

tr|A0A073KMY5|A0A073KMY5\_9GAMM KLLDKGVKRRHMTPAVRDNLMLMTTTEYKGIKADIVVEAVEEDLNLKQMVADIE..

sp|A0KV76|FADJ\_SHESA KLLDKGVKRRHMTPAVRDNLMLMTTTEYKGIKADIVVEAVEEDLNLKQMVADIE..

tr|A0A220UTH7|A0A220UTH7\_9GAMM KLLDKGVKRRHMTPAVRDNLMLMTTTEYKGIKADIVVEAVEEDLNLKQMVADIE..

tr|A0A5B8R6W1|A0A5B8R6W1\_9GAMM KLLDKGVKRRHMTPAVRDNLMLMTTTEYKGIKADIVVEAVEEDLNLKQMVADIE..

tr|V1DAI4|V1DAI4\_9GAMM KLLDKGVKRRHMTPAVRDNLMLMTTTEYKGIKADIVVEAVEEDLNLKQMVADIE..

tr|A0A448CPQ4|A0A448CPQ4\_SHEPU KLLDKGVKRRHMTPAVRDNLMLMTTTEYKGIKADIVVEAVEEDLNLKQMVADIE..

tr|A0A252ERQ3|A0A252ERQ3\_SHEPU KLLDKGVKRRHMTPAVRDNLMLMTTTEYKGIKADIVVEAVEEDLNLKQMVADIE..

sp|Q0HKD1|FADJ\_SHESM KLLDKGVKRRHMTPAVRDNLMLMTTTEYKGIKADIVVEAVEEDLNLKQMVADIE..

sp|Q0HWN3|FADJ\_SHESR KLLDKGVKRRHMTPAVRDNLMLMTTTEYKGIKADIVVEAVEEDLNLKQMVADIE..

tr|F7RQE3|F7RQE3\_9GAMM KLLDKGVKRRHMTPAVRDNLMLMTTTEYKGIKADIVVEAVEEDLNLKQMVADIE..

tr|B8EE98|B8EE98\_SHEB2 KLLDKGVKRRHMTPAVRDNLMLMTTTEYKGIKADIVVEAVEEDLNLKQMVADIE..

sp|A6WQ25|FADJ\_SHEB8 KLLDKGVKRRHMTPAVRDNLMLMTTTEYKGIKADIVVEAVEEDLNLKQMVADIE..

tr|A0A448EK41|A0A448EK41\_9GAMM KLLDKGVKRRHMTPAVRDNLMLMTTTEYKGIKADIVVEAVEEDLNLKQMVADIE..

tr|A0A553JHX1|A0A553JHX1\_SHEHA KLLDKGVKRRHMTPAVRDNLMLMTTTEYKGIKADIVVEAVEEDLNLKQMVADIE..

tr|B8CPY6|B8CPY6\_SHEFW KLLDKGVKRRHMTPAVRDNLMLMTTTEYKGIKADIVVEAVEEDLNLKQMVADIE..

tr|A0A431WFC4|A0A431WFC4\_9GAMM KLLDKGVKRRHMTPAVRDNLMLMTTTEYKGIKADIVVEAVEEDLNLKQMVADIE..

tr|A8FTR7|A8FTR7\_SHESH KLLDKGVKRRHMTPAVRDNLMLMTTTEYKGIKADIVVEAVEEDLNLKQMVADIE..

tr|A0A431WNL0|A0A431WNL0\_9GAMM KLLDKGVKRRHMTPAVRDNLMLMTTTEYKGIKADIVVEAVEEDLNLKQMVADIE..

tr|A0A550AEC5|A0A550AEC5\_9GAMM KLLDKGVKRRHMTPAVRDNLMLMTTTEYKGIKADIVVEAVEEDLNLKQMVADIE..

tr|A0A7L4WW90|A0A7L4WW90\_9GAMM KLLDKGVKRRHMTPAVRDNLMLMTTTEYKGIKADIVVEAVEEDLNLKQMVADIE..

tr|A9DDU3|A9DDU3\_9GAMM KLLDKGVKRRHMTPAVRDNLMLMTTTEYKGIKADIVVEAVEEDLNLKQMVADIE..

tr|A0A330M2B9|A0A330M2B9\_9GAMM KLLDKGVKRRHMTPAVRDNLMLMTTTEYKGIKADIVVEAVEEDLNLKQMVADIE..

tr|A0A5N8UFC7|A0A5N8UFC7\_9GAMM KLLDKGVKRRHMTPAVRDNLMLMTTTEYKGIKADIVVEAVEEDLNLKQMVADIE..

tr|A0A1S6HN57|A0A1S6HN57\_9GAMM KLLDKGVKRRHMTPAVRDNLMLMTTTEYKGIKADIVVEAVEEDLNLKQMVADIE..

tr|D4ZMH7|D4ZMH7\_SHEVD KLLDKGVKRRHMTPAVRDNLMLMTTTEYKGIKADIVVEAVEEDLNLKQMVADIE..

tr|A0A3L8Q213|A0A3L8Q213\_9GAMM KQLDKKVVRRHTASARDNLMALMTTTEYKGVKADIVVEAVEEDLNLKQMVADIE..

tr|A0A3A6U4N9|A0A3A6U4N9\_9GAMM KLLDKKVVRRHTASARDNLMALMTTTEYKGVKADIVVEAVEEDLNLKQMVADIE..

tr|A0A4Q5MA37|A0A4Q5MA37\_9GAMM KLLDKKVVRRHTASARDNLMALMTTTEYKGVKADIVVEAVEEDLNLKQMVADIE..

tr|A0A1L6LSX5|A0A1L6LSX5\_9DELTA DILDEDDVKKKRLTKLERDQKLLLSGTTDYGAMKSAVLVEAVEEDLDVKKHVIIEIE..

tr|A0A2W4L9B9|A0A2W4L9B9\_9PROT RVLDDRVKRRITPVEREVMARITGTRDYSGFNVDLVEAVEEDLNLKQMVADIE..

tr|A0A2W4M4E6|A0A2W4M4E6\_9PROT KILDRVKKRSITPVERDRLMAQITPTTYSGRFREALVEAVEEDLNLKQMVADIE..

tr|A0A6I2GRX9|A0A6I2GRX9\_9DELTA GVLDERVKKRSITRREATAKSALVTAGTDYAGFKSADLVEAVEEDLNLKQMVADIE..

tr|A0A0H4WMK2|A0A0H4WMK2\_9DELTA TILDERVKKRSITRREATAKSALVTAGTDYAGFKSADLVEAVEEDLNLKQMVADIE..

tr|F8CJ36|F8CJ36\_MYXFH SILDERRVKKRSITRREATAKSALVTAGTDYAGFKSADLVEAVEEDLNLKQMVADIE..

tr|A0A250K0F1|A0A250K0F1\_9DELTA SILDERRVKKRSITRREATAKSALVTAGTDYAGFKSADLVEAVEEDLNLKQMVADIE..

tr|A0A7Y6WFZ2|A0A7Y6WFZ2\_9DELTA SILDERRVKKRSITRREATAKSALVTAGTDYAGFKSADLVEAVEEDLNLKQMVADIE..

tr|A0A7Y7C660|A0A7Y7C660\_9DELTA SILDERRVKKRSITRREATAKSALVTAGTDYAGFKSADLVEAVEEDLNLKQMVADIE..

tr|A0A7Y4JFH2|A0A7Y4JFH2\_MYXXA SILDERRVKKRSITRREATAKSALVTAGTDYAGFKSADLVEAVEEDLNLKQMVADIE..

tr|A0A4Y6CZQ9|A0A4Y6CZQ9\_MYXXA SILDERRVKKRSITRREATAKSALVTAGTDYAGFKSADLVEAVEEDLNLKQMVADIE..

|                |                   |                                            |      |       |           |    |
|----------------|-------------------|--------------------------------------------|------|-------|-----------|----|
| tr A0A7Y4IKV5  | A0A7Y4IKV5_MYXXA  | SILDERVKRRSLTRREATAKSALVTAGTDYSGFKSADLVI   | EAVF | EDLKL | KHRIIAEVE | .. |
| tr A0A511HHB0  | A0A511HHB0_9DELT  | SILDERVKRRSLTRREATAKSALVTAGTDYSGFKSADLVI   | EAVF | EDLKL | KHRIIAEVE | .. |
| tr A0A4Y6CKY7  | A0A4Y6CKY7_MYXXA  | SILDERVKRRSLTRREATAKSALVTAGTDYSGFKSADLVI   | EAVF | EDLKL | KHRIIAEVE | .. |
| tr Q1D1F2      | Q1D1F2_MYXXD      | SILDERVKRRSLTRREATAKSALVTAGTDYSGFKSADLVI   | EAVF | EDLKL | KHRIIAEVE | .. |
| tr A0A7Y4MA14  | A0A7Y4MA14_MYXXA  | SILDERVKRRSLTRREATAKSALVTAGTDYSGFKSADLVI   | EAVF | EDLKL | KHRIIAEVE | .. |
| tr A0A7T8Y4N9  | A0A7T8Y4N9_MYXXA  | SILDERVKRRSLTRREATAKSALVTAGTDYSGFKSADLVI   | EAVF | EDLKL | KHRIIAEVE | .. |
| tr L7UE67      | L7UE67_MYXSD      | GILDERVKRRSLTWREAAAKQAHITAGTDYSGFKSADLVI   | EAVF | EDLKL | KHRIIAEVE | .. |
| tr A0A511T9X1  | A0A511T9X1_MYXFU  | GILDERVKRRSLTWREAAAKQARITAGTDYSGFKSADLVI   | EAVF | EDLKL | KHRIIAEVE | .. |
| tr A0A7Y7C9C4  | A0A7Y7C9C4_9DELT  | GILDERVKRRSLTWREAAAKQARITAGTDYSGFKSADLVI   | EAVF | EDLKL | KHRIIAEVE | .. |
| tr A0A540X7W8  | A0A540X7W8_9DELT  | GILDERVKRRSLTWREAAAKQARITAGTDYSGFKSADLVI   | EAVF | EDLKL | KHRIIAEVE | .. |
| tr A0A3A85FK19 | A0A3A85FK19_9DELT | SVLDERVKRRSLTSREAVAKMAMVTAGTDYSGFKSADLVI   | EAVF | EDLKL | KHRIIAEVE | .. |
| tr A0A3A8JQL9  | A0A3A8JQL9_9DELT  | TVLDERVKRRSLTPRESNAKLSNITAGTDYSGFKSADLVI   | EAVF | EDLKL | KHRIIAEVE | .. |
| tr A0A7Y4NFA4  | A0A7Y4NFA4_9DELT  | TVLDERVKRRSLTHREANAKLSNITAGTDYSGFKSADLVI   | EAVF | EDLKL | KHRIIAEVE | .. |
| tr A0A3A8HDQ7  | A0A3A8HDQ7_9DELT  | TVLDERVKRRSLTHREANAKLSNITAGTDYSGFKSADLVI   | EAVF | EDLKL | KHRIIAEVE | .. |
| tr A0A3A8GR90  | A0A3A8GR90_9DELT  | TVLDERVKRRSLTRLESNAKLSNITAGTDYSGFKSADLVI   | EAVF | EDLKL | KHRIIAEVE | .. |
| tr A0A3A8SBD7  | A0A3A8SBD7_9DELT  | TVLDERVKRRSLTRLESNAKLSNITAGTDYSGFKSADLVI   | EAVF | EDLKL | KHRIIAEVE | .. |
| tr A0A3A8T0I8  | A0A3A8T0I8_9DELT  | TVLDERVKRRSLTRLESNAKLSNITAGTDYSGFKSADLVI   | EAVF | EDLKL | KHRIIAEVE | .. |
| tr A0A7X5BU07  | A0A7X5BU07_9DELT  | TVLDERVKRRSLTRLESNAKLSNITAGTDYSGFKSADLVI   | EAVF | EDLKL | KHRIIAEVE | .. |
| tr A0A7Y1RVL2  | A0A7Y1RVL2_9DELT  | TVLDERVKRRSLTRLESNAKLSNITAGTDYSGFKSADLVI   | EAVF | EDLKL | KHRIIAEVE | .. |
| tr A0A3A8THN2  | A0A3A8THN2_9DELT  | TVLDERVKRRSLTRLESNAKLSNITAGTDYSGFKSADLVI   | EAVF | EDLKL | KHRIIAEVE | .. |
| tr A0A7Y1RX76  | A0A7Y1RX76_9DELT  | TVLDERVKRRSLTRLESNAKLSNITAGTDYSGFKSADLVI   | EAVF | EDLKL | KHRIIAEVE | .. |
| tr A0A3A8RA58  | A0A3A8RA58_9DELT  | TVLDERVKRRSLTRLESNAKLSNITAGTDYSGFKSADLVI   | EAVF | EDLKL | KHRIIAEVE | .. |
| tr A0A410RPB6  | A0A410RPB6_CORCK  | TVLDERVKRRSLTRLESNAKLSNITAGTDYSGFKSADLVI   | EAVF | EDLKL | KHRIIAEVE | .. |
| tr A0A7Y4J474  | A0A7Y4J474_CORCK  | TVLDERVKRRSLTRLESNAKLSNITAGTDYSGFKSADLVI   | EAVF | EDLKL | KHRIIAEVE | .. |
| tr A0A3A8I9Z6  | A0A3A8I9Z6_9DELT  | TVLDERVKRRSLTRLESNAKLSNITAGTDYSGFKSADLVI   | EAVF | EDLKL | KHRIIAEVE | .. |
| tr H8MKE9      | H8MKE9_CORCM      | TVLDERVKRRSLTRLESNAKLSNITAGTDYSGFKSADLVI   | EAVF | EDLKL | KHRIIAEVE | .. |
| tr A0A3A8H102  | A0A3A8H102_9DELT  | TVLDERVKRRSLTRLESNAKLSNITAGTDYSGFKSADLVI   | EAVF | EDLKL | KHRIIAEVE | .. |
| tr A0A554FW33  | A0A554FW33_9DELT  | TVLDERVKRRSLTHREASAKLANITAAATDYSGFKSNVDLVI | EAVF | EDLKL | KHRIIAEVE | .. |
| tr A0A3A8NPC0  | A0A3A8NPC0_9DELT  | TVLDERVKRRSLTHREASAKLSNITAAATDYSGFKSNVDLVI | EAVF | EDLKL | KHRIIAEVE | .. |
| tr A0A3A8JUV3  | A0A3A8JUV3_9DELT  | TVLDERVKRRSLTHREASAKLSNITAAATDYSGFKSNVDLVI | EAVF | EDLKL | KHRIIAEVE | .. |
| tr A0A3A8NEX6  | A0A3A8NEX6_9DELT  | TVLDERVKRRSLTHREASAKLSNITAAATDYSGFKSNVDLVI | EAVF | EDLKL | KHRIIAEVE | .. |
| tr A0A3A8JEU8  | A0A3A8JEU8_9DELT  | SVLDERVKRRSLTHREASAKMSNITAGTDYSGFKSNVDLVI  | EAVF | EDLKL | KHRIIAEVE | .. |
| tr A0A3A8LI76  | A0A3A8LI76_9DELT  | TVLDERVKRRSLTHREASAKMSNITAGTDYSGFKSNVDLVI  | EAVF | EDLKL | KHRIIAEVE | .. |
| tr A0A085WXN8  | A0A085WXN8_9DELT  | SVLDERVKRRSLTWREAAAKQALITAGTDYSGFKSNVDLVI  | EAVF | EDLKL | KHRIIAEVE | .. |
| tr A0A2T4V0M5  | A0A2T4V0M5_9DELT  | SIYDERVKRRSLTWREAAAKMALVTGGTGYEGFKSNVDVVI  | EAVF | EDLKL | KHRIIAEVE | .. |
| tr A0A0G2ZSW5  | A0A0G2ZSW5_9DELT  | GLYDERVKRRSLTWREAAAKMALVTGGTGYEGFKSNVDVVI  | EAVF | EDLKL | KHRIIAEVE | .. |
| tr A0A3M2DKY0  | A0A3M2DKY0_9DELT  | GIHDERVARRRSTPRELERLKMALITATDYSGFADCDVVI   | EAVF | EDLKL | KHRIIAEVE | .. |
| tr A0A661NQ58  | A0A661NQ58_9DELT  | EIVDKRLERRRITKLDADRMLTMSIGTTSYDGLGDAEII    | EAVF | EDLKL | KHRIIAEVE | .. |
| tr A0A520YD99  | A0A520YD99_9DELT  | GIIIDGRVKKRRLTERQADALMLQTTGTTSYEGFKIDVVI   | EAVF | EDLKL | KHRIIAEVE | .. |
| tr A0A7Y3BRE4  | A0A7Y3BRE4_9DELT  | GIIIDGRVKKRRLTERQADALMLQTTGTTSYEGFKIDVVI   | EAVF | EDLKL | KHRIIAEVE | .. |
| tr A0A2D9TF90  | A0A2D9TF90_9DELT  | DLLDGRVKKRRLTTPMKADQLMMQISGATDYSGFADCNVVI  | EAVF | EDLKL | KHRIIAEVE | .. |
| tr A0A2E0TF32  | A0A2E0TF32_9DELT  | GIIIDGRVKKRRLTTPMDADELMLQTTGTTDYSGFHRCVVI  | EAVF | EDLKL | KHRIIAEVE | .. |
| tr A0A2E4Y3V1  | A0A2E4Y3V1_9PROT  | GALNKRVRKRAMSSFERDKIFSSLTQTQDWTVFECPLVI    | EAVF | EDLKL | KHRIIAEVE | .. |
| tr A0A2E6VRH4  | A0A2E6VRH4_9DELT  | SVLNKTKTKRKAISAFERDRMLSQVIGQVNTGFENCELVV   | EAVF | EDLKL | KHRIIAEVE | .. |
| tr A0A1F9FB59  | A0A1F9FB59_9DELT  | SDLDKRVRSHAMSPFERDRFTSGVVPKTDYRGFDKCELVI   | EAVF | EDLKL | KHRIIAEVE | .. |

ECHA\_HUMAN

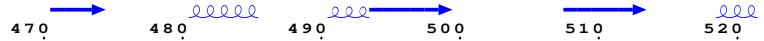

ECHA\_HUMAN
tr |A0A4R6XLA8 |A0A4R6XLA8\_9GAMM
tr |A0A6A01JT2 |A0A6A01JT2\_9BACT
tr |A0A7V3QZU7 |A0A7V3QZU7\_9BACT
tr |A0A7V4SYJ6 |A0A7V4SYJ6\_9BACT
tr |A0A2A8D2N6 |A0A2A8D2N6\_9BACT
tr |A0A2N1TGP0 |A0A2N1TGP0\_9SPFR
tr |A0A1G3QGWA |A0A1G3QGWA\_9SPFR
tr |A0A1G3QTY3 |A0A1G3QTY3\_9SPFR
tr |A0A7X9L359 |A0A7X9L359\_9DELTA
tr |A0A522CJY0 |A0A522CJY0\_9SPFR
tr |A0A2N1RRJ3 |A0A2N1RRJ3\_9SPFR
tr |A0A2N2KFN7 |A0A2N2KFN7\_9DELTA
tr |A0A1V6AXX9 |A0A1V6AXX9\_9DELTA
tr |A0A2N2HZL0 |A0A2N2HZL0\_9DELTA
tr |A0A5E8ARP3 |A0A5E8ARP3\_9BACT
tr |A0A662A7B1 |A0A662A7B1\_9BACT
tr |D7CV16 |D7CV16\_TRURR
tr |A0A3C2AKX4 |A0A3C2AKX4\_9FLAO
tr |A0A3B8ZLN3 |A0A3B8ZLN3\_9PLAN
tr |A0A345UGV8 |A0A345UGV8\_9BACT
tr |A0A6C1P6A2 |A0A6C1P6A2\_9BACT
tr |A0A3MLX9W8 |A0A3MLX9W8\_9BACT
tr |A0A354C796 |A0A354C796\_9DELTA
tr |A0A3M1NUM8 |A0A3M1NUM8\_9BACT
tr |A0A3M2KRC8 |A0A3M2KRC8\_9BACT
tr |A0A5S9IHR0 |A0A5S9IHR0\_9BACT
tr |A0A6M1ST81 |A0A6M1ST81\_9BACT
tr |A0A521AAE5 |A0A521AAE5\_9BACT
tr |A0A1M4ZMD6 |A0A1M4ZMD6\_9BACT
tr |A0A2A2GCS2 |A0A2A2GCS2\_9BACT
tr |A0A5D3YIH7 |A0A5D3YIH7\_9BACT
tr |A0A6M1T9G0 |A0A6M1T9G0\_9BACT
tr |A0A6A8Q1Y8 |A0A6A8Q1Y8\_9BACT
tr |A0A521EBV3 |A0A521EBV3\_9BACT
tr |A0A359E0Y8 |A0A359E0Y8\_9BACT
tr |A0A2D8CIM6 |A0A2D8CIM6\_9BACT
tr |A0A2D9FWF5 |A0A2D9FWF5\_9BACT
tr |A0A1B6YB70 |A0A1B6YB70\_9BACT
tr |A0A2D4ZTC0 |A0A2D4ZTC0\_9BACT
tr |A0A3D4UVW7 |A0A3D4UVW7\_9BACT
tr |A0A3F313M2 |A0A3F313M2\_9BACT
tr |A0A3D1G7L9 |A0A3D1G7L9\_9BACT
tr |A0A3M8G1Y8 |A0A3M8G1Y8\_9BACT
tr |A0A5Q4F391 |A0A5Q4F391\_9BACT
tr |A0A6I7NPV0 |A0A6I7NPV0\_9BACT
tr |A0A651G1J2 |A0A651G1J2\_9BACT
tr |A0A371QRK5 |A0A371QRK5\_9BACT
tr |A0A2N0VGJ5 |A0A2N0VGJ5\_9BACT
tr |A0A316TYJ0 |A0A316TYJ0\_9BACT
tr |A0A651GLZ8 |A0A651GLZ8\_9BACT
tr |A0A7Y5V3S5 |A0A7Y5V3S5\_9BACT
tr |A0A7W1SHC0 |A0A7W1SHC0\_9BACT
tr |A0A7Y5PBT7 |A0A7Y5PBT7\_9BACT
tr |A0A7Y5TXL8 |A0A7Y5TXL8\_9BACT
tr |A0A423PQ96 |A0A423PQ96\_9GAMM
tr |U2G066 |U2G066\_9GAMM
tr |A0A2E0J1F4 |A0A2E0J1F4\_9GAMM
tr |A0A2D4SCM8 |A0A2D4SCM8\_9GAMM
tr |LOWJH1 |LOWJH1\_9GAMM
tr |A0A1H5XF61 |A0A1H5XF61\_9GAMM
tr |A0A2E9TS48 |A0A2E9TS48\_9GAMM
tr |A0A095UE19 |A0A095UE19\_9GAMM
tr |A0A7G2S9A0 |A0A7G2S9A0\_9GAMM
tr |B5JU27 |B5JU27\_9GAMM
tr |A0A1Y0IHP1 |A0A1Y0IHP1\_9GAMM
tr |A0A316FZ14 |A0A316FZ14\_9GAMM
tr |A0A498C231 |A0A498C231\_9GAMM
tr |Q0A6T4 |Q0A6T4\_ALKEH
tr |A0A3E0WL10 |A0A3E0WL10\_9GAMM
tr |A0A3S1BU16 |A0A3S1BU16\_9GAMM
tr |A0A7V8QFN9 |A0A7V8QFN9\_9GAMM
tr |A0A1H8PFF9 |A0A1H8PFF9\_9GAMM
tr |A0A6H0J0V7 |A0A6H0J0V7\_9GAMM
tr |V5EZX6 |V5EZX6\_9VIBR
tr |A0A6I1QBM2 |A0A6I1QBM2\_9VIBR
tr |A0A511QRL5 |A0A511QRL5\_9VIBR
tr |A0A7Y0JZP4 |A0A7Y0JZP4\_9VIBR
tr |A0A193KD24 |A0A193KD24\_9VIBR
tr |A0A1S1HM72 |A0A1S1HM72\_PROST
tr |A0A7T8I613 |A0A7T8I613\_9GAMM
tr |A0A140NIF0 |A0A140NIF0\_PROSM
tr |A0A379GMB7 |A0A379GMB7\_PROST
tr |A0A379H393 |A0A379H393\_PROST
tr |B2Q0L5 |B2Q0L5\_PROST
tr |A0A6I3JUE9 |A0A6I3JUE9\_9GAMM
tr |A0A7D4P594 |A0A7D4P594\_YERMW
tr |A0A7U7IVK6 |A0A7U7IVK6\_YEREN
tr |A0A447RIF5 |A0A447RIF5\_YEREN
tr |A0A7H4ZLV9 |A0A7H4ZLV9\_YERP4
tr |A0A0H3NX46 |A0A0H3NX46\_YERE1
tr |A0A7T9XUV7 |A0A7T9XUV7\_YEREN
tr |A0A7U7IYV8 |A0A7U7IYV8\_YEREN
tr |A0A0H5G7G2 |A0A0H5G7G2\_YEREN
tr |A0A2A7TDI2 |A0A2A7TDI2\_YERKR
tr |A0A0T9M261 |A0A0T9M261\_YERKR
tr |A0A0A0CMP1 |A0A0A0CMP1\_PHOLU
tr |A0A329VG55 |A0A329VG55\_9GAMM
sp |Q7N288 |FADJ\_PHOLL
tr |A0A6L9JMX5 |A0A6L9JMX5\_PHOLM
tr |A0A7X5HQ29 |A0A7X5HQ29\_PHOLM
tr |A0A1C0U051 |A0A1C0U051\_9GAMM
tr |A0A7X5QF62 |A0A7X5QF62\_9GAMM

tr|A0A2D0KWM9|A0A2D0KWM9\_9GAMM...ANTKAETIFASNTSSLPFHQIAEIAKRPEQVIGLHYFSPVDKMPLEVIPHAGTSEKT  
tr|A0A2D0LAI1|A0A2D0LAI1\_9GAMM...ANTKAETIFASNTSSLPFHQIAEIAKRPEQVIGLHYFSPVDKMPLEVIPHAGTSEKT  
tr|A0A2D0IXC8|A0A2D0IXC8\_XENBU...AHTKPEITIFASNTSSLPFHQIAEIAKRPEQVIGLHYFSPVDKMPLEVIPHAGTSEKT  
tr|W1JAM5|W1JAM5\_9GAMM...AHTKPEITIFASNTSSLPFHQIAEIAKRPEQVIGLHYFSPVDKMPLEVIPHAGTSEKT  
tr|A0A3D9UED3|A0A3D9UED3\_9GAMM...THTKPEITIFASNTSSLPFHQIAEIAKRPEQVIGLHYFSPVDKMPLEVIPHAGTSEKT  
tr|A0A1I3JCA9|A0A1I3JCA9\_9GAMM...NNTNPDITIFASNTSSLPFHQIAEIAKRPEQVIGLHYFSPVDKMPLEVIPHAGTSEKT  
tr|A0A068QUL9|A0A068QUL9\_9GAMM...EHTKPEITIFASNTSSLPFHQIAEIAKRPEQVIGLHYFSPVDKMPLEVIPHAGTSEKT  
tr|A0A0M0TCH6|A0A0M0TCH6\_9GAMM...ENTKPEITIFASNTSSLPFHQIAEIAKRPEQVIGLHYFSPVDKMPLEVIPHAGTSEKT  
tr|A0A1Q5U854|A0A1Q5U854\_9GAMM...ENTKPEITIFASNTSSLPFHQIAEIAKRPEQVIGLHYFSPVDKMPLEVIPHAGTSEKT  
tr|A0A2D0ISP1|A0A2D0ISP1\_9GAMM...ENTKPEITIFASNTSSLPFHQIAEIAKRPEQVIGLHYFSPVDKMPLEVIPHAGTSEKT  
tr|A0A1Q5TUI8|A0A1Q5TUI8\_9GAMM...EHTKPEITIFASNTSSLPFHQIAEIAKRPEQVIGLHYFSPVDKMPLEVIPHAGTSEKT  
tr|A0A2D0KJI7|A0A2D0KJI7\_9GAMM...EHTKPEITIFASNTSSLPFHQIAEIAKRPEQVIGLHYFSPVDKMPLEVIPHAGTSEKT  
tr|A0A1Y2SB97|A0A1Y2SB97\_9GAMM...EHTKPEITIFASNTSSLPFHQIAEIAKRPEQVIGLHYFSPVDKMPLEVIPHAGTSEKT  
tr|A0A1I5DWI7|A0A1I5DWI7\_9GAMM...VHTKPEITIFASNTSSLPFHQIAEIAKRPEQVIGLHYFSPVDKMPLEVIPHAGTSEKT  
tr|A0A1I7GWY6|A0A1I7GWY6\_9GAMM...DNTKPDITIFASNTSSLPFHQIAEIAKRPEQVIGLHYFSPVDKMPLEVIPHAGTSEKT  
tr|D3VKY8|D3VKY8\_XENNA...DNTKPDITIFASNTSSLPFHQIAEIAKRPEQVIGLHYFSPVDKMPLEVIPHAGTSEKT  
tr|A0A2G0Q6Q9|A0A2G0Q6Q9\_9GAMM...NRAKPETIFASNTSSLPFHQIAEIAKRPEQVIGLHYFSPVDKMPLEVIPHAGTSEKT  
tr|A0A2D0JU24|A0A2D0JU24\_9GAMM...ENTKPKTIFASNTSSLPFHQIAEIAKRPEQVIGLHYFSPVDKMPLEVIPHAGTSEKT  
tr|A0A0J5FN38|A0A0J5FN38\_9GAMM...ENTKPEITIFASNTSSLPFHQIAEIAKRPEQVIGLHYFSPVDKMPLEVIPHAGTSEKT  
tr|A0A432XLD4|A0A432XLD4\_9GAMM...AAGHENTIFASNTSSLPFHQIAEIAKRPEQVIGLHYFSPVDKMPLEVIPHAGTSEKT  
tr|A0A2D8HU84|A0A2D8HU84\_9GAMM...EHAHAESTIFASNTSSLPFHQIAEIAKRPEQVIGLHYFSPVDKMPLEVIPHAGTSEKT  
tr|A0A656X1Q2|A0A656X1Q2\_9GAMM...EHAHAESTIFASNTSSLPFHQIAEIAKRPEQVIGLHYFSPVDKMPLEVIPHAGTSEKT  
tr|A0A4Q1QH79|A0A4Q1QH79\_9GAMM...AHASESTIFASNTSSLPFHQIAEIAKRPEQVIGLHYFSPVDKMPLEVIPHAGTSEKT  
tr|A0A1G7LQE6|A0A1G7LQE6\_9GAMM...EHAHAESTIFASNTSSLPFHQIAEIAKRPEQVIGLHYFSPVDKMPLEVIPHAGTSEKT  
tr|A0A432YV7|A0A432YV7\_9GAMM...EHAHAESTIFASNTSSLPFHQIAEIAKRPEQVIGLHYFSPVDKMPLEVIPHAGTSEKT  
tr|A0A1J5N0P5|A0A1J5N0P5\_9GAMM...THCGEHTIFASNTSSLPFHQIAEIAKRPEQVIGLHYFSPVDKMPLEVIPHAGTSEKT  
tr|A0A0D8D548|A0A0D8D548\_9GAMM...EFCCKPTIFASNTSSLPFHQIAEIAKRPEQVIGLHYFSPVDKMPLEVIPHAGTSEKT  
tr|A0A3E0TNM2|A0A3E0TNM2\_9GAMM...OHCCKPETIFASNTSSLPFHQIAEIAKRPEQVIGLHYFSPVDKMPLEVIPHAGTSEKT  
tr|A0A3E0UD67|A0A3E0UD67\_9GAMM...OHCCKPETIFASNTSSLPFHQIAEIAKRPEQVIGLHYFSPVDKMPLEVIPHAGTSEKT  
tr|A0A3E0U0P4|A0A3E0U0P4\_9GAMM...OHCCKPETIFASNTSSLPFHQIAEIAKRPEQVIGLHYFSPVDKMPLEVIPHAGTSEKT  
tr|A0A0M2V8B1|A0A0M2V8B1\_9GAMM...OHCHEHTIFASNTSSLPFHQIAEIAKRPEQVIGLHYFSPVDKMPLEVIPHAGTSEKT  
tr|A0A285ITY5|A0A285ITY5\_9GAMM...OHCHEHTIFASNTSSLPFHQIAEIAKRPEQVIGLHYFSPVDKMPLEVIPHAGTSEKT  
tr|A0A486XTB9|A0A486XTB9\_9GAMM...OHCSERTIFASNTSSLPFHQIAEIAKRPEQVIGLHYFSPVDKMPLEVIPHAGTSEKT  
tr|I1E1G1|I1E1G1\_9GAMM...OHCSEHTIFASNTSSLPFHQIAEIAKRPEQVIGLHYFSPVDKMPLEVIPHAGTSEKT  
tr|A0A1H6KJ68|A0A1H6KJ68\_9GAMM...OHCSEHTIFASNTSSLPFHQIAEIAKRPEQVIGLHYFSPVDKMPLEVIPHAGTSEKT  
tr|A0A0X3Y764|A0A0X3Y764\_9GAMM...OHCADSTIFASNTSSLPFHQIAEIAKRPEQVIGLHYFSPVDKMPLEVIPHAGTSEKT  
tr|A0A2N1YEV4|A0A2N1YEV4\_9GAMM...OHCADSTIFASNTSSLPFHQIAEIAKRPEQVIGLHYFSPVDKMPLEVIPHAGTSEKT  
tr|A0A3P3QCM3|A0A3P3QCM3\_9GAMM...ANCSEQTIFASNTSSLPFHQIAEIAKRPEQVIGLHYFSPVDKMPLEVIPHAGTSEKT  
tr|F7NT72|F7NT72\_9GAMM...TNCSEHTIFASNTSSLPFHQIAEIAKRPEQVIGLHYFSPVDKMPLEVIPHAGTSEKT  
tr|A0A3S2TW63|A0A3S2TW63\_9GAMM...TNCSEHTIFASNTSSLPFHQIAEIAKRPEQVIGLHYFSPVDKMPLEVIPHAGTSEKT  
tr|A0A3D5BGW7|A0A3D5BGW7\_9GAMM...SHCHENTIFASNTSSLPFHQIAEIAKRPEQVIGLHYFSPVDKMPLEVIPHAGTSEKT  
tr|A0A5C7T117|A0A5C7T117\_9GAMM...OHCSEHTIFASNTSSLPFHQIAEIAKRPEQVIGLHYFSPVDKMPLEVIPHAGTSEKT  
tr|A0A0U4W982|A0A0U4W982\_9GAMM...OHCSEHTIFASNTSSLPFHQIAEIAKRPEQVIGLHYFSPVDKMPLEVIPHAGTSEKT  
tr|A0A2I0FCM2|A0A2I0FCM2\_9GAMM...ANCNENTIFASNTSSLPFHQIAEIAKRPEQVIGLHYFSPVDKMPLEVIPHAGTSEKT  
tr|A0A2G2IVL1|A0A2G2IVL1\_9GAMM...ANCNENTIFASNTSSLPFHQIAEIAKRPEQVIGLHYFSPVDKMPLEVIPHAGTSEKT  
tr|A6F121|A6F121\_9GAMM...ANCNENTIFASNTSSLPFHQIAEIAKRPEQVIGLHYFSPVDKMPLEVIPHAGTSEKT  
tr|A0A4U1BNR2|A0A4U1BNR2\_9GAMM...ANCSPDTIFASNTSSLPFHQIAEIAKRPEQVIGLHYFSPVDKMPLEVIPHAGTSEKT  
tr|E1SQ60|E1SQ60\_FERB2...ANCSEHTIFASNTSSLPFHQIAEIAKRPEQVIGLHYFSPVDKMPLEVIPHAGTSEKT  
tr|A0A4Y6IZ09|A0A4Y6IZ09\_9GAMM...RECCEHTIFASNTSSLPFHQIAEIAKRPEQVIGLHYFSPVDKMPLEVIPHAGTSEKT  
tr|A0A0C3QSZ7|A0A0C3QSZ7\_9GAMM...RECCEHTIFASNTSSLPFHQIAEIAKRPEQVIGLHYFSPVDKMPLEVIPHAGTSEKT  
tr|A0A6L7HXW0|A0A6L7HXW0\_9GAMM...RECCEHTIFASNTSSLPFHQIAEIAKRPEQVIGLHYFSPVDKMPLEVIPHAGTSEKT  
tr|A3QFP3|FADJ\_SHELP...RECCEHTIFASNTSSLPFHQIAEIAKRPEQVIGLHYFSPVDKMPLEVIPHAGTSEKT  
tr|A0A1E5IXH7|A0A1E5IXH7\_SHECO...RECCEHTIFASNTSSLPFHQIAEIAKRPEQVIGLHYFSPVDKMPLEVIPHAGTSEKT  
tr|A0A411PKQ0|A0A411PKQ0\_9GAMM...RECCEHTIFASNTSSLPFHQIAEIAKRPEQVIGLHYFSPVDKMPLEVIPHAGTSEKT  
tr|A0A6G9QKM3|A0A6G9QKM3\_9GAMM...RECCEHTIFASNTSSLPFHQIAEIAKRPEQVIGLHYFSPVDKMPLEVIPHAGTSEKT  
tr|A0A6P1UL63|A0A6P1UL63\_9GAMM...RECCEHTIFASNTSSLPFHQIAEIAKRPEQVIGLHYFSPVDKMPLEVIPHAGTSEKT  
tr|A0A2N1ERI9|A0A2N1ERI9\_9GAMM...RECCEHTIFASNTSSLPFHQIAEIAKRPEQVIGLHYFSPVDKMPLEVIPHAGTSEKT  
tr|A0A7W4FU55|A0A7W4FU55\_9GAMM...RECCEHTIFASNTSSLPFHQIAEIAKRPEQVIGLHYFSPVDKMPLEVIPHAGTSEKT  
tr|Q8ECP7|FADJ\_SHEON...RECCEHTIFASNTSSLPFHQIAEIAKRPEQVIGLHYFSPVDKMPLEVIPHAGTSEKT  
tr|A0A501XZY8|A0A501XZY8\_9GAMM...RECCEHTIFASNTSSLPFHQIAEIAKRPEQVIGLHYFSPVDKMPLEVIPHAGTSEKT  
tr|A0A2W5DCZ0|A0A2W5DCZ0\_SHEOE...RECCEHTIFASNTSSLPFHQIAEIAKRPEQVIGLHYFSPVDKMPLEVIPHAGTSEKT  
tr|A0A1E3V3C8|A0A1E3V3C8\_9GAMM...RECCEHTIFASNTSSLPFHQIAEIAKRPEQVIGLHYFSPVDKMPLEVIPHAGTSEKT  
tr|A0A1Z4AI20|A0A1Z4AI20\_9GAMM...RECCEHTIFASNTSSLPFHQIAEIAKRPEQVIGLHYFSPVDKMPLEVIPHAGTSEKT  
tr|A0A7X9LJL9|A0A7X9LJL9\_9GAMM...RECCEHTIFASNTSSLPFHQIAEIAKRPEQVIGLHYFSPVDKMPLEVIPHAGTSEKT  
tr|A0A073KMY5|A0A073KMY5\_9GAMM...RECCEHTIFASNTSSLPFHQIAEIAKRPEQVIGLHYFSPVDKMPLEVIPHAGTSEKT  
tr|A0KV76|FADJ\_SHEA...RECCEHTIFASNTSSLPFHQIAEIAKRPEQVIGLHYFSPVDKMPLEVIPHAGTSEKT  
tr|A0A220UTH7|A0A220UTH7\_9GAMM...RECCEHTIFASNTSSLPFHQIAEIAKRPEQVIGLHYFSPVDKMPLEVIPHAGTSEKT  
tr|A0A5B8R6W1|A0A5B8R6W1\_9GAMM...RECCEHTIFASNTSSLPFHQIAEIAKRPEQVIGLHYFSPVDKMPLEVIPHAGTSEKT  
tr|V1DAI4|V1DAI4\_9GAMM...RECCEHTIFASNTSSLPFHQIAEIAKRPEQVIGLHYFSPVDKMPLEVIPHAGTSEKT  
tr|A0A448CPQ4|A0A448CPQ4\_SHEPU...RECCEHTIFASNTSSLPFHQIAEIAKRPEQVIGLHYFSPVDKMPLEVIPHAGTSEKT  
tr|A0A252ERQ3|A0A252ERQ3\_SHEPU...RECCEHTIFASNTSSLPFHQIAEIAKRPEQVIGLHYFSPVDKMPLEVIPHAGTSEKT  
tr|Q0HKD1|FADJ\_SHESM...RECCEHTIFASNTSSLPFHQIAEIAKRPEQVIGLHYFSPVDKMPLEVIPHAGTSEKT  
tr|Q0HWN3|FADJ\_SHESR...RECCEHTIFASNTSSLPFHQIAEIAKRPEQVIGLHYFSPVDKMPLEVIPHAGTSEKT  
tr|F7RQE3|F7RQE3\_9GAMM...RECCEHTIFASNTSSLPFHQIAEIAKRPEQVIGLHYFSPVDKMPLEVIPHAGTSEKT  
tr|B8EE98|B8EE98\_SHEB2...RECCEHTIFASNTSSLPFHQIAEIAKRPEQVIGLHYFSPVDKMPLEVIPHAGTSEKT  
tr|A6WQ25|FADJ\_SHEB8...RECCEHTIFASNTSSLPFHQIAEIAKRPEQVIGLHYFSPVDKMPLEVIPHAGTSEKT  
tr|A0A448EK41|A0A448EK41\_9GAMM...RECCEHTIFASNTSSLPFHQIAEIAKRPEQVIGLHYFSPVDKMPLEVIPHAGTSEKT  
tr|A0A553JHX1|A0A553JHX1\_SHEHA...RECCEHTIFASNTSSLPFHQIAEIAKRPEQVIGLHYFSPVDKMPLEVIPHAGTSEKT  
tr|B8CPY6|B8CPY6\_SHEFW...RECCEHTIFASNTSSLPFHQIAEIAKRPEQVIGLHYFSPVDKMPLEVIPHAGTSEKT  
tr|A0A431WFC4|A0A431WFC4\_9GAMM...RECCEHTIFASNTSSLPFHQIAEIAKRPEQVIGLHYFSPVDKMPLEVIPHAGTSEKT  
tr|A8FTR7|A8FTR7\_SHESH...RECCEHTIFASNTSSLPFHQIAEIAKRPEQVIGLHYFSPVDKMPLEVIPHAGTSEKT  
tr|A0A431WNL0|A0A431WNL0\_9GAMM...RECCEHTIFASNTSSLPFHQIAEIAKRPEQVIGLHYFSPVDKMPLEVIPHAGTSEKT  
tr|A0A550AEC5|A0A550AEC5\_9GAMM...RECCEHTIFASNTSSLPFHQIAEIAKRPEQVIGLHYFSPVDKMPLEVIPHAGTSEKT  
tr|A0A7L4WW90|A0A7L4WW90\_9GAMM...RECCEHTIFASNTSSLPFHQIAEIAKRPEQVIGLHYFSPVDKMPLEVIPHAGTSEKT  
tr|A9DDU3|A9DDU3\_9GAMM...RECCEHTIFASNTSSLPFHQIAEIAKRPEQVIGLHYFSPVDKMPLEVIPHAGTSEKT  
tr|A0A330M2B9|A0A330M2B9\_9GAMM...RECCEHTIFASNTSSLPFHQIAEIAKRPEQVIGLHYFSPVDKMPLEVIPHAGTSEKT  
tr|A0A5N8UFC7|A0A5N8UFC7\_9GAMM...RECCEHTIFASNTSSLPFHQIAEIAKRPEQVIGLHYFSPVDKMPLEVIPHAGTSEKT  
tr|A0A1S6HN57|A0A1S6HN57\_9GAMM...RECCEHTIFASNTSSLPFHQIAEIAKRPEQVIGLHYFSPVDKMPLEVIPHAGTSEKT  
tr|D4ZMH7|D4ZMH7\_SHEVD...RECCEHTIFASNTSSLPFHQIAEIAKRPEQVIGLHYFSPVDKMPLEVIPHAGTSEKT  
tr|A0A3L8Q213|A0A3L8Q213\_9GAMM...RECCEHTIFASNTSSLPFHQIAEIAKRPEQVIGLHYFSPVDKMPLEVIPHAGTSEKT  
tr|A0A3A6U4N9|A0A3A6U4N9\_9GAMM...RECCEHTIFASNTSSLPFHQIAEIAKRPEQVIGLHYFSPVDKMPLEVIPHAGTSEKT  
tr|A0A4Q5MA37|A0A4Q5MA37\_9GAMM...RECCEHTIFASNTSSLPFHQIAEIAKRPEQVIGLHYFSPVDKMPLEVIPHAGTSEKT  
tr|A0A1L6LSX5|A0A1L6LSX5\_9DELTA...AAGKEGVIIFASNTSSLPFHQIAEIAKRPEQVIGLHYFSPVDKMPLEVIPHAGTSEKT  
tr|A0A2W4L9B9|A0A2W4L9B9\_9PROT...EVIDEDCIIFASNTSSLPFHQIAEIAKRPEQVIGLHYFSPVDKMPLEVIPHAGTSEKT  
tr|A0A2W4M4E6|A0A2W4M4E6\_9PROT...QYGHPNAIIFASNTSSLPFHQIAEIAKRPEQVIGLHYFSPVDKMPLEVIPHAGTSEKT  
tr|A0A6I2GRX9|A0A6I2GRX9\_9DELTA...AVTREDCIIFASNTSSLPFHQIAEIAKRPEQVIGLHYFSPVDKMPLEVIPHAGTSEKT  
tr|A0A0H4WMK2|A0A0H4WMK2\_9DELTA...AVTGEQTIIFASNTSSLPFHQIAEIAKRPEQVIGLHYFSPVDKMPLEVIPHAGTSEKT  
tr|F8CJ36|F8CJ36\_MYXFH...AVTGDQTIIFASNTSSLPFHQIAEIAKRPEQVIGLHYFSPVDKMPLEVIPHAGTSEKT  
tr|A0A250K0F1|A0A250K0F1\_9DELTA...AVTGDQTIIFASNTSSLPFHQIAEIAKRPEQVIGLHYFSPVDKMPLEVIPHAGTSEKT  
tr|A0A7Y6WFZ2|A0A7Y6WFZ2\_9DELTA...AVTGDQTIIFASNTSSLPFHQIAEIAKRPEQVIGLHYFSPVDKMPLEVIPHAGTSEKT  
tr|A0A7Y7C660|A0A7Y7C660\_9DELTA...AVTGDQTIIFASNTSSLPFHQIAEIAKRPEQVIGLHYFSPVDKMPLEVIPHAGTSEKT  
tr|A0A7Y4JFH2|A0A7Y4JFH2\_MYXXA...AVTGDQTIIFASNTSSLPFHQIAEIAKRPEQVIGLHYFSPVDKMPLEVIPHAGTSEKT  
tr|A0A4Y6CZQ9|A0A4Y6CZQ9\_MYXXA...AVTGDQTIIFASNTSSLPFHQIAEIAKRPEQVIGLHYFSPVDKMPLEVIPHAGTSEKT

tr|A0A7Y4IKV5|A0A7Y4IKV5\_MYXXA .. AVTGDQTI FASNTSSIPITELAKGSR RPAQVIGM HYFSPVHKMPLLEIITHAGTADWV  
tr|A0A511HHB0|A0A511HHB0\_9DELT .. AVTGDQTI FASNTSSIPITELAKGSR RPAQVIGM HYFSPVHKMPLLEIITHAGTADWV  
tr|A0A4Y6CKY7|A0A4Y6CKY7\_MYXXA .. AVTGDQTI FASNTSSIPITELAKGSR RPAQVIGM HYFSPVHKMPLLEIITHAGTADWV  
tr|Q1D1F2|Q1D1F2\_MYXXD .. AVTGDQTI FASNTSSIPITELAKGSR RPAQVIGM HYFSPVHKMPLLEIITHAGTADWV  
tr|A0A7Y4MA14|A0A7Y4MA14\_MYXXA .. AVTGDQTI FASNTSSIPITELAKGSR RPAQVIGM HYFSPVHKMPLLEIITHAGTADWV  
tr|A0A7T8Y4N9|A0A7T8Y4N9\_MYXXA .. AVTGDQTI FASNTSSIPITELAKGSR RPAQVIGM HYFSPVHKMPLLEIITHAGTADWV  
tr|L7UB67|L7UB67\_MYXSD .. AVTRPDAI FASNTSSIPITELAKGSR RPAQVIGM HYFSPVHKMPLLEIITHAGTADWV  
tr|A0A511T9X1|A0A511T9X1\_MYXFU .. AVTGPDAI FASNTSSIPITELAKGSR RPAQVIGM HYFSPVHKMPLLEIITHAGTADQV  
tr|A0A7Y7C9C4|A0A7Y7C9C4\_9DELT .. AVTGPDAI FASNTSSIPITELAKGSR RPAQVIGM HYFSPVHKMPLLEIITHAGTADWV  
tr|A0A540X7W8|A0A540X7W8\_9DELT .. AVTGPDAI FASNTSSIPITELAKGSR RPAQVIGM HYFSPVHKMPLLEIITHAGTADWV  
tr|A0A3A8FK19|A0A3A8FK19\_9DELT .. AVTREDCI FASNTSSIPITELAKGSR RPAQVIGM HYFSPVHKMPLLEIITHPGTAEWV  
tr|A0A3A8JQL9|A0A3A8JQL9\_9DELT .. AVTGTENTI FASNTSSIPITELAKGSR RPSQVIGM HYFSPVHKMPLLEIITHPGTAEWV  
tr|A0A7Y4NFA4|A0A7Y4NFA4\_9DELT .. AVTGTENTI FASNTSSIPITELAKGSR RPSQVIGM HYFSPVHKMPLLEIITHPGTAEWV  
tr|A0A3A8HDQ7|A0A3A8HDQ7\_9DELT .. AVTGTENTI FASNTSSIPITELAKGSR RPSQVIGM HYFSPVHKMPLLEIITHPGTAEWV  
tr|A0A3A8GR90|A0A3A8GR90\_9DELT .. AVTGTENTI FASNTSSIPITELAKGSR RPSQVIGM HYFSPVHKMPLLEIITHPGTAEWV  
tr|A0A3A8SBD7|A0A3A8SBD7\_9DELT .. AVTGTENTI FASNTSSIPITELAKGSR RPSQVIGM HYFSPVHKMPLLEIITHPGTAEWV  
tr|A0A3A8T0I8|A0A3A8T0I8\_9DELT .. AVTGTENTI FASNTSSIPITELAKGSR RPSQVIGM HYFSPVHKMPLLEIITHPGTAEWV  
tr|A0A7X5BU07|A0A7X5BU07\_9DELT .. AVTGTENTI FASNTSSIPITELAKGSR RPSQVIGM HYFSPVHKMPLLEIITHPGTAEWV  
tr|A0A7Y1RVL2|A0A7Y1RVL2\_9DELT .. AVTGTENTI FASNTSSIPITELAKGSR RPSQVIGM HYFSPVHKMPLLEIITHPGTAEWV  
tr|A0A3A8THN2|A0A3A8THN2\_9DELT .. AVTGTENTI FASNTSSIPITELAKGSR RPSQVIGM HYFSPVHKMPLLEIITHPGTAEWV  
tr|A0A7Y1RX76|A0A7Y1RX76\_9DELT .. AVTGTENTI FASNTSSIPITELAKGSR RPSQVIGM HYFSPVHKMPLLEIITHPGTAEWV  
tr|A0A3A8RA58|A0A3A8RA58\_9DELT .. AVTGTENTI FASNTSSIPITELAKGSR RPSQVIGM HYFSPVHKMPLLEIITHPGTAEWV  
tr|A0A410RPB6|A0A410RPB6\_CORCK .. AVTGTENTI FASNTSSIPITELAKGSR RPSQVIGM HYFSPVHKMPLLEIITHPGTAEWV  
tr|A0A7Y4J474|A0A7Y4J474\_CORCK .. AVTGTENTI FASNTSSIPITELAKGSR RPSQVIGM HYFSPVHKMPLLEIITHPGTAEWV  
tr|A0A3A8I9Z6|A0A3A8I9Z6\_9DELT .. AVTGTENTI FASNTSSIPITELAKGSR RPSQVIGM HYFSPVHKMPLLEIITHPGTAEWV  
tr|H8MKE9|H8MKE9\_CORCM .. AVTGTENTI FASNTSSIPITELAKGSR RPSQVIGM HYFSPVHKMPLLEIITHPGTAEWV  
tr|A0A3A8H102|A0A3A8H102\_9DELT .. AVTGTENTI FASNTSSIPITELAKGSR RPSQVIGM HYFSPVHKMPLLEIITHPGTAEWV  
tr|A0A554FW33|A0A554FW33\_9DELT .. AVTGADTI FASNTSSIPITELAKGSR RPSQVIGM HYFSPVHKMPLLEIITHPGTAEWV  
tr|A0A3A8NPC0|A0A3A8NPC0\_9DELT .. AVTGADTI FASNTSSIPITELAKGSR RPSQVIGM HYFSPVHKMPLLEIITHPGTAEWV  
tr|A0A3A8JUV3|A0A3A8JUV3\_9DELT .. AITGPDTI FASNTSSIPITELAKGSR RPAQVIGM HYFSPVHKMPLLEIITHPGTAEWV  
tr|A0A3A8NEX6|A0A3A8NEX6\_9DELT .. AVTGADTI FASNTSSIPITELAKGSR RPSQVIGM HYFSPVHKMPLLEIITHPGTAEWV  
tr|A0A3A8JEU8|A0A3A8JEU8\_9DELT .. AVTGADTI FASNTSSIPITELAKGSR RPSQVIGM HYFSPVHKMPLLEIITHPGTAEWV  
tr|A0A3A8LI76|A0A3A8LI76\_9DELT .. AVTGADTI FASNTSSIPITELAKGSR RPSQVIGM HYFSPVHKMPLLEIITHPGTAEWV  
tr|A0A085WXN8|A0A085WXN8\_9DELT .. AVTREDCI FASNTSSIPITELAKGSR RPEQVIGM HYFSPVHKMPLLEIITHKGTADWV  
tr|A0A2T4V0M5|A0A2T4V0M5\_9DELT .. AVTREDCI FASNTSSIPITELAKGSR RPAQVIGM HYFSPVHKMPLLEIITHKGTADWV  
tr|A0A0G2ZSW5|A0A0G2ZSW5\_9DELT .. LVTRREDCI FASNTSSIPITELAKGSR RPAQVIGM HYFSPVHKMPLLEIITHKGTADWV  
tr|A0A3M2DKY0|A0A3M2DKY0\_9DELT .. DIGGDDVI FASNTSSIPITARIAEASRHPETVIGM HYFSPVHKMPLLEIIVTDTADWV  
tr|A0A661NQ58|A0A661NQ58\_9DELT .. AATGKETI FASNTSSIPITRIAEASRHPETVIGM HYFSPVHKMPLLEIITTEATADWV  
tr|A0A520YD99|A0A520YD99\_9DELT .. EAGRDDVI FASNTSSIPITMIAAASKHPETVIGM HYFSPVHKMPLLEIIVTDKTDWV  
tr|A0A7Y3BRE4|A0A7Y3BRE4\_9DELT .. EAGRDDVI FASNTSSIPITMIAAASKHPETVIGM HYFSPVHKMPLLEIIVTDKTDWV  
tr|A0A2D9TF90|A0A2D9TF90\_9DELT .. AHGPEGVI FASNTSSIPITQIADAAAKPENVI GMYFSPVHKMPLLEIIVTEKTSDEV  
tr|A0A2E0TP32|A0A2E0TP32\_9DELT .. AAGPEDVI FASNTSSIPITGEIAEASMHHPETVIGM HYFSPVHKMPLLEIIVTEKTDWV  
tr|A0A2E4Y3V1|A0A2E4Y3V1\_9PROT .. KIAPEDCV FASNTSALPITKQIAAVSKRPNENVLGM HYFSPVHKMPLLEIIVTDKTSDBA  
tr|A0A2E6VRH4|A0A2E6VRH4\_9DELT .. EHINEDCI FASNTSALPITADIAKGSKRPNENVGM HYFSPVHKMPLLEIIVKIDETSENA  
tr|A0A1F9FB59|A0A1F9FB59\_9DELT .. DHVRTDCV FASNTSALPITKLAEASKRPHNII GMYFSPVHKMPLLEIIVHKGTAKEA

ECHA\_HUMAN

000000000

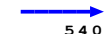

0000000000000000

000000000

|                  |                                                                |     |     |     |     |     |     |
|------------------|----------------------------------------------------------------|-----|-----|-----|-----|-----|-----|
|                  |                                                                | 530 | 540 | 550 | 560 | 570 | 580 |
| ECHA_HUMAN       | SASAVAVGLKQGGKVIIVVDKGGPFFYTRRLAPMMSSEVIRILOEGVDPKLLDSITTSFGFP |     |     |     |     |     |     |
| tr A0A4R6XLA8    | A0A4R6XLA8_9GAMM                                               |     |     |     |     |     |     |
| tr A0A6A01JT2    | A0A6A01JT2_9BACT                                               |     |     |     |     |     |     |
| tr A0A7V3QZU7    | A0A7V3QZU7_9BACT                                               |     |     |     |     |     |     |
| tr A0A7V4SYJ6    | A0A7V4SYJ6_9BACT                                               |     |     |     |     |     |     |
| tr A0A2A8D2N6    | A0A2A8D2N6_9BACT                                               |     |     |     |     |     |     |
| tr A0A2N1TGP0    | A0A2N1TGP0_9SPFR                                               |     |     |     |     |     |     |
| tr A0A1G3QGW4    | A0A1G3QGW4_9SPFR                                               |     |     |     |     |     |     |
| tr A0A1G3QTY3    | A0A1G3QTY3_9SPFR                                               |     |     |     |     |     |     |
| tr A0A7X9L359    | A0A7X9L359_9DELTA                                              |     |     |     |     |     |     |
| tr A0A522CJY0    | A0A522CJY0_9SPFR                                               |     |     |     |     |     |     |
| tr A0A2N1RRJ3    | A0A2N1RRJ3_9SPFR                                               |     |     |     |     |     |     |
| tr A0A2N2KFN7    | A0A2N2KFN7_9DELTA                                              |     |     |     |     |     |     |
| tr A0A1V6AXX9    | A0A1V6AXX9_9DELTA                                              |     |     |     |     |     |     |
| tr A0A2N2HZL0    | A0A2N2HZL0_9DELTA                                              |     |     |     |     |     |     |
| tr A0A5E8ARP3    | A0A5E8ARP3_9BACT                                               |     |     |     |     |     |     |
| tr A0A662A7B1    | A0A662A7B1_9BACT                                               |     |     |     |     |     |     |
| tr D7CV16 D7CV16 | TRURR                                                          |     |     |     |     |     |     |
| tr A0A3C2AKX4    | A0A3C2AKX4_9FLAO                                               |     |     |     |     |     |     |
| tr A0A3B8ZLN3    | A0A3B8ZLN3_9PLAN                                               |     |     |     |     |     |     |
| tr A0A345UGV8    | A0A345UGV8_9BACT                                               |     |     |     |     |     |     |
| tr A0A6C1P6A2    | A0A6C1P6A2_9BACT                                               |     |     |     |     |     |     |
| tr A0A3MLX9W8    | A0A3MLX9W8_9BACT                                               |     |     |     |     |     |     |
| tr A0A354C796    | A0A354C796_9DELTA                                              |     |     |     |     |     |     |
| tr A0A3M1NUM8    | A0A3M1NUM8_9BACT                                               |     |     |     |     |     |     |
| tr A0A3M2KRC8    | A0A3M2KRC8_9BACT                                               |     |     |     |     |     |     |
| tr A0A5S91HR0    | A0A5S91HR0_9BACT                                               |     |     |     |     |     |     |
| tr A0A6M1ST81    | A0A6M1ST81_9BACT                                               |     |     |     |     |     |     |
| tr A0A521AAE5    | A0A521AAE5_9BACT                                               |     |     |     |     |     |     |
| tr A0A1M4ZMD6    | A0A1M4ZMD6_9BACT                                               |     |     |     |     |     |     |
| tr A0A2A2GCS2    | A0A2A2GCS2_9BACT                                               |     |     |     |     |     |     |
| tr A0A5D3YIH7    | A0A5D3YIH7_9BACT                                               |     |     |     |     |     |     |
| tr A0A6M1T9G0    | A0A6M1T9G0_9BACT                                               |     |     |     |     |     |     |
| tr A0A6A8Q1Y8    | A0A6A8Q1Y8_9BACT                                               |     |     |     |     |     |     |
| tr A0A521BVJ3    | A0A521BVJ3_9BACT                                               |     |     |     |     |     |     |
| tr A0A359E0Y8    | A0A359E0Y8_9BACT                                               |     |     |     |     |     |     |
| tr A0A2D8CIM6    | A0A2D8CIM6_9BACT                                               |     |     |     |     |     |     |
| tr A0A2D9FWF5    | A0A2D9FWF5_9BACT                                               |     |     |     |     |     |     |
| tr A0A1B6YB70    | A0A1B6YB70_9BACT                                               |     |     |     |     |     |     |
| tr A0A2D4ZTC0    | A0A2D4ZTC0_9BACT                                               |     |     |     |     |     |     |
| tr A0A3D4UVW7    | A0A3D4UVW7_9BACT                                               |     |     |     |     |     |     |
| tr A0A3F313M2    | A0A3F313M2_9BACT                                               |     |     |     |     |     |     |
| tr A0A3D1G7L9    | A0A3D1G7L9_9BACT                                               |     |     |     |     |     |     |
| tr A0A3M8G1Y8    | A0A3M8G1Y8_9BACT                                               |     |     |     |     |     |     |
| tr A0A5Q4F391    | A0A5Q4F391_9BACT                                               |     |     |     |     |     |     |
| tr A0A6I7NPV0    | A0A6I7NPV0_9BACT                                               |     |     |     |     |     |     |
| tr A0A651G1J2    | A0A651G1J2_9BACT                                               |     |     |     |     |     |     |
| tr A0A371QRK5    | A0A371QRK5_9BACT                                               |     |     |     |     |     |     |
| tr A0A2N0VGJ5    | A0A2N0VGJ5_9BACT                                               |     |     |     |     |     |     |
| tr A0A316TYJ0    | A0A316TYJ0_9BACT                                               |     |     |     |     |     |     |
| tr A0A651GLZ8    | A0A651GLZ8_9BACT                                               |     |     |     |     |     |     |
| tr A0A7Y5V3S5    | A0A7Y5V3S5_9BACT                                               |     |     |     |     |     |     |
| tr A0A7W1SHC0    | A0A7W1SHC0_9BACT                                               |     |     |     |     |     |     |
| tr A0A7Y5PBT7    | A0A7Y5PBT7_9BACT                                               |     |     |     |     |     |     |
| tr A0A7Y5TXL8    | A0A7Y5TXL8_9BACT                                               |     |     |     |     |     |     |
| tr A0A423PQ96    | A0A423PQ96_9GAMM                                               |     |     |     |     |     |     |
| tr U2G066 U2G066 | 9GAMM                                                          |     |     |     |     |     |     |
| tr A0A2E0J1F4    | A0A2E0J1F4_9GAMM                                               |     |     |     |     |     |     |
| tr A0A2D4SCM8    | A0A2D4SCM8_9GAMM                                               |     |     |     |     |     |     |
| tr LOWJH1 LOWJH1 | 9GAMM                                                          |     |     |     |     |     |     |
| tr A0A1H5XF61    | A0A1H5XF61_9GAMM                                               |     |     |     |     |     |     |
| tr A0A2E9TS48    | A0A2E9TS48_9GAMM                                               |     |     |     |     |     |     |
| tr A0A095UE19    | A0A095UE19_9GAMM                                               |     |     |     |     |     |     |
| tr A0A7G2S9A0    | A0A7G2S9A0_9GAMM                                               |     |     |     |     |     |     |
| tr B5JU27 B5JU27 | 9GAMM                                                          |     |     |     |     |     |     |
| tr A0A1Y0IHP1    | A0A1Y0IHP1_9GAMM                                               |     |     |     |     |     |     |
| tr A0A316FZ14    | A0A316FZ14_9GAMM                                               |     |     |     |     |     |     |
| tr A0A498C231    | A0A498C231_9GAMM                                               |     |     |     |     |     |     |
| tr Q0A6T4 Q0A6T4 | ALKEH                                                          |     |     |     |     |     |     |
| tr A0A3E0WL10    | A0A3E0WL10_9GAMM                                               |     |     |     |     |     |     |
| tr A0A3S1BU16    | A0A3S1BU16_9GAMM                                               |     |     |     |     |     |     |
| tr A0A7V8QFN9    | A0A7V8QFN9_9GAMM                                               |     |     |     |     |     |     |
| tr A0A1H8PPF9    | A0A1H8PPF9_9GAMM                                               |     |     |     |     |     |     |
| tr A0A6H0J0V7    | A0A6H0J0V7_9GAMM                                               |     |     |     |     |     |     |
| tr V5EZX6 V5EZX6 | 9VIBR                                                          |     |     |     |     |     |     |
| tr A0A611QBM2    | A0A611QBM2_9VIBR                                               |     |     |     |     |     |     |
| tr A0A511QRL5    | A0A511QRL5_9VIBR                                               |     |     |     |     |     |     |
| tr A0A7Y0JZP4    | A0A7Y0JZP4_9VIBR                                               |     |     |     |     |     |     |
| tr A0A193KD24    | A0A193KD24_9VIBR                                               |     |     |     |     |     |     |
| tr A0A1S1HM72    | A0A1S1HM72_PROST                                               |     |     |     |     |     |     |
| tr A0A7T8I613    | A0A7T8I613_9GAMM                                               |     |     |     |     |     |     |
| tr A0A140NIF0    | A0A140NIF0_PROSM                                               |     |     |     |     |     |     |
| tr A0A379GMB7    | A0A379GMB7_PROST                                               |     |     |     |     |     |     |
| tr A0A379H393    | A0A379H393_PROST                                               |     |     |     |     |     |     |
| tr B2Q0L5 B2Q0L5 | PROST                                                          |     |     |     |     |     |     |
| tr A0A6I3JUE9    | A0A6I3JUE9_9GAMM                                               |     |     |     |     |     |     |
| tr A0A7D4P594    | A0A7D4P594_YERMW                                               |     |     |     |     |     |     |
| tr A0A7U7IVK6    | A0A7U7IVK6_YEREN                                               |     |     |     |     |     |     |
| tr A0A447RIF5    | A0A447RIF5_YEREN                                               |     |     |     |     |     |     |
| tr A0A7H4ZLV9    | A0A7H4ZLV9_YERP4                                               |     |     |     |     |     |     |
| tr A0A0H3NX46    | A0A0H3NX46_YERE1                                               |     |     |     |     |     |     |
| tr A0A7T9XUV7    | A0A7T9XUV7_YEREN                                               |     |     |     |     |     |     |
| tr A0A7U7IYV8    | A0A7U7IYV8_YEREN                                               |     |     |     |     |     |     |
| tr A0A0H5G7G2    | A0A0H5G7G2_YEREN                                               |     |     |     |     |     |     |
| tr A0A2A7TDI2    | A0A2A7TDI2_YERKR                                               |     |     |     |     |     |     |
| tr A0A0T9M261    | A0A0T9M261_YERKR                                               |     |     |     |     |     |     |
| tr A0A0A0CMP1    | A0A0A0CMP1_PHOLU                                               |     |     |     |     |     |     |
| tr A0A329VG55    | A0A329VG55_9GAMM                                               |     |     |     |     |     |     |
| tr Q7N288 FADJ   | PHOLL                                                          |     |     |     |     |     |     |
| tr A0A6L9JMX5    | A0A6L9JMX5_PHOLM                                               |     |     |     |     |     |     |
| tr A0A7X5HQ29    | A0A7X5HQ29_PHOLM                                               |     |     |     |     |     |     |
| tr A0A1C0U051    | A0A1C0U051_9GAMM                                               |     |     |     |     |     |     |
| tr A0A7X5QF62    | A0A7X5QF62_9GAMM                                               |     |     |     |     |     |     |

tr|A0A2D0KWM9|A0A2D0KWM9\_9GAMM IATVAVLAKKQKGTAIIVGDKAGFYVNRILSPYINEAGYCLVEGEP IEHIDKALVDF GFFP  
tr|A0A2D0LAI1|A0A2D0LAI1\_9GAMM IATVAVLAKKQKGTAIIVGDKAGFYVNRILSPYINEAGYCLVEGEP IEHIDKALVDF GFFP  
tr|A0A2D0IXC8|A0A2D0IXC8\_XENBU IATVAVLAKKQKGTAIIVGDKAGFYVNRILSPYINEAGYCLVEGEP VNHIDKALVDF GFFP  
tr|W1JAM5|W1JAM5\_9GAMM IATVAVLAKKQKGTAIIVGDKAGFYVNRILSPYINEAGYCLVEGEP IEHIDKALVDF GFFP  
tr|A0A3D9UED3|A0A3D9UED3\_9GAMM IATVAVLAKKQKGTAIIVGDKAGFYVNRILSPYINEAGYCLVEGEP VNHIDKALVDF GFFP  
tr|A0A1I3JCA9|A0A1I3JCA9\_9GAMM VATAVALAKKQKGTAIIVGDKAGFYVNRILSPYINEAGYCLVEGEP IEHIDKALVDF GFFP  
tr|A0A068QUL9|A0A068QUL9\_9GAMM IATVAVLAKKQKGTAIIVGDKAGFYVNRILTPYINEAGYCLVEGEP IEHIDKALVDF GFFP  
tr|A0A0M0TCH6|A0A0M0TCH6\_9GAMM IATVAVLAKKQKGTAIIVGDKAGFYVNRILTPYINEAGYCLVEGEP VEHIDNALNDF GFFP  
tr|A0A1Q5U854|A0A1Q5U854\_9GAMM IATVAVLAKKQKGTAIIVGDKAGFYVNRILTPYINEAGYCLVEGEP IEHIDNALMNF GFFP  
tr|A0A2D0ISP1|A0A2D0ISP1\_9GAMM IATVAVLAKKQKGTAIIVGDKAGFYVNRILTPYINEAGYCLVEGEP IEHIDNALMNF GFFP  
tr|A0A1Q5TUI8|A0A1Q5TUI8\_9GAMM IATVAVLAKKQKGTAIIVGDKAGFYVNRILTPYINEAGYCLVEGEP IEHIDNALMNF GFFP  
tr|A0A2D0KJ17|A0A2D0KJ17\_9GAMM IATVAVLAKKQKGTAIIVGDKAGFYVNRILTPYINEAGYCLVEGEP IEHIDNALMNF GFFP  
tr|A0A1Y2SB97|A0A1Y2SB97\_9GAMM IATVAVLAKKQKGTAIIVGDKAGFYVNRILTPYINEAGYCLVEGEP IEHIDNALMNF GFFP  
tr|A0A1I5DWI7|A0A1I5DWI7\_9GAMM IATVAVLAKKQKGTAIIVGDKAGFYVNRILTPYINEAGYCLVEGEP IEHIDNALMNF GFFP  
tr|A0A1I7GWY6|A0A1I7GWY6\_9GAMM IATVAVLAKKQKGTAIIVGDKAGFYVNRILTPYINEAGYCLVEGEP VDHIDKALVDF GFFP  
tr|D3VKY8|D3VKY8\_XENNA IATVAVLAKKQKGTAIIVGDKAGFYVNRILTPYINEAGYCLVAGEP IDHDIDKALVDF GFFP  
tr|A0A2G0Q6Q9|A0A2G0Q6Q9\_9GAMM IATVAVLAKKQKGTAIIVGDKAGFYVNRILTPYINEAGYCLVEGEP VEHIDKALVDF GFFP  
tr|A0A2D0JU24|A0A2D0JU24\_9GAMM IATVAVLAKKQKGTAIIVGDKAGFYVNRILTPYINEAGYCLVEGEP VEHIDKALVDF GFFP  
tr|A0A0J5FN38|A0A0J5FN38\_9GAMM IATVAVLAKKQKGTAIIVGDKAGFYVNRILTPYINEAGYCLVEGEP VEHIDKALVDF GFFP  
tr|A0A432XLD4|A0A432XLD4\_9GAMM IATVAVLAKKQKGTPIIVKDGAGFYVNRILAPYMNAAARLVLEGEPIEVDQALVDF GFFP  
tr|A0A2D8HU84|A0A2D8HU84\_9GAMM IATVAVLAKKQKGTPIIVKDGAGFYVNRILAPYMNAAARLLLAGEP IEHLDKTLVDF GFFP  
tr|A0A656X1Q2|A0A656X1Q2\_9GAMM IATVAVLAKKQKGTPIIVKDGAGFYVNRILAPYMNAAARLLLAGEP IEHLDKTLVDF GFFP  
tr|A0A4Q1QH79|A0A4Q1QH79\_9GAMM IATVAVLAKKQKGTPIIVKDGAGFYVNRILAPYMNAAARLLLAGEP IEKLDKTLVDF GFFP  
tr|A0A1G7LQE6|A0A1G7LQE6\_9GAMM IATVAVLAKKQKGTPIIVKDGAGFYVNRILAPYMNAAARLLLAGEP IEKLDKTLVDF GFFP  
tr|A0A432YV7|A0A432YV7\_9GAMM IATVAVLAKKQKGTPIIVKDGAGFYVNRILAPYMNAAARLLLAGEP IEKLDKTLVDF GFFP  
tr|A0A1J5N0P5|A0A1J5N0P5\_9GAMM IATVAVLAKKQKGTPIIVKDGAGFYVNRILAPYMNAAARLLLAGEP IEKLDKTLVDF GFFP  
tr|A0A0D8D548|A0A0D8D548\_9GAMM IATVAVLAKKQKGTPIIVKDGAGFYVNRILAPYMNAAANLLLEGEPIEKLKALVDF GFFP  
tr|A0A3E0TMM2|A0A3E0TMM2\_9GAMM IATVAVLAKKQKGTPIIVKDGAGFYVNRILAPYMNAAARLLLAGEP IEKLDKTLVDF GFFP  
tr|A0A3E0UD67|A0A3E0UD67\_9GAMM IATVAVLAKKQKGTPIIVKDGAGFYVNRILAPYMNAAARLLLAGEP IEKLDKTLVDF GFFP  
tr|A0A3E00UP4|A0A3E00UP4\_9GAMM IATVAVLAKKQKGTPIIVKDGAGFYVNRILAPYMNAAARLLLAGEP IEKLDKTLVDF GFFP  
tr|A0A0M2V8B1|A0A0M2V8B1\_9GAMM IATVAVLAKKQKGTPIIVKDGAGFYVNRILAPYMNAAARLLLAGEP IEKLDKTLVDF GFFP  
tr|A0A285ITY5|A0A285ITY5\_9GAMM IATVAVLAKKQKGTPIIVKDGAGFYVNRILAPYMNAAARLLLAGEP IEKLDKTLVDF GFFP  
tr|A0A486XTB9|A0A486XTB9\_9GAMM IATVAVLAKKQKGTPIIVKDGAGFYVNRILAPYMNAAARLLLAGEP IEKLDKTLVDF GFFP  
tr|I1E1G1|I1E1G1\_9GAMM IATVAVLAKKQKGTPIIVKDGAGFYVNRILAPYMNAAANLLLEGEPIEKLKALVDF GFFP  
tr|A0A1H6KJ68|A0A1H6KJ68\_9GAMM IATVAVLAKKQKGTPIIVKDGAGFYVNRILAPYMNAAANLLLEGEPIEKLKALVDF GFFP  
tr|A0A0X3Y764|A0A0X3Y764\_9GAMM IATVAVLAKKQKGTPIIVKDGAGFYVNRILAPYMNAAANLLLEGEPIEKLKALVDF GFFP  
tr|A0A2N1YEV4|A0A2N1YEV4\_9GAMM IATVAVLAKKQKGTPIIVKDGAGFYVNRILAPYMNAAANLLLEGEPIEKLKALVDF GFFP  
tr|A0A3P3QCM3|A0A3P3QCM3\_9GAMM IATVAVLAKKQKGTPIIVKDGAGFYVNRILAPYMNAAANLLLEGEPIEKLKALVDF GFFP  
tr|F7NT72|F7NT72\_9GAMM IATVAVLAKKQKGTPIIVKDGAGFYVNRILAPYMNAAANLLLEGEPIEKLKALVDF GFFP  
tr|A0A3S2TW63|A0A3S2TW63\_9GAMM IATVAVLAKKQKGTPIIVKDGAGFYVNRILAPYMNAAANLLLEGEPIEKLKALVDF GFFP  
tr|A0A3D5BGW7|A0A3D5BGW7\_9GAMM IATVAVLAKKQKGTPIIVKDGAGFYVNRILAPYMNAAANLLLEGEPIEKLKALVDF GFFP  
tr|A0A5C7T117|A0A5C7T117\_9GAMM IATVAVLAKKQKGTPIIVKDGAGFYVNRILAPYMNAAANLLLEGEPIEKLKALVDF GFFP  
tr|A0A0U4W982|A0A0U4W982\_9GAMM IATVAVLAKKQKGTPIIVKDGAGFYVNRILAPYMNAAANLLLEGEPIEKLKALVDF GFFP  
tr|A0A2I0FCM2|A0A2I0FCM2\_9GAMM IATVAVLAKKQKGTPIIVKDGAGFYVNRILAPYMNAAANLLLEGEPIEKLKALVDF GFFP  
tr|A0A2G2IVL1|A0A2G2IVL1\_9GAMM IATVAVLAKKQKGTPIIVKDGAGFYVNRILAPYMNAAARLVLEGEPIEAVDKALVDF GFFP  
tr|A6F21|A6F21\_9GAMM IATVAVLAKKQKGTPIIVKDGAGFYVNRILAPYMNAAARLVLEGEPIEAVDKALVDF GFFP  
tr|A0A4U1BNR2|A0A4U1BNR2\_9GAMM IATVAVLAKKQKGTPIIVKDGAGFYVNRILAPYMNAAANLLLEGEPIEKLKALVDF GFFP  
tr|E1SQ60|E1SQ60\_FERED IATVAVLAKKQKGTPIIVKDGAGFYVNRILAPYMNAAANLLLEGEPIEKLKALVDF GFFP  
tr|A0A4Y6IZ09|A0A4Y6IZ09\_9GAMM IATVAVLAKKQKGTPIIVKDGAGFYVNRILAPYMNAAANLLLEGEPIEKLKALVDF GFFP  
tr|A0A0C3QSZ7|A0A0C3QSZ7\_9GAMM IATVAVLAKKQKGTPIIVKDGAGFYVNRILAPYMNAAANLLLEGEPIEKLKALVDF GFFP  
tr|A0A6L7HXW0|A0A6L7HXW0\_9GAMM IATVAVLAKKQKGTPIIVKDGAGFYVNRILAPYMNAAANLLLEGEPIEKLKALVDF GFFP  
sp|A3QFP3|FADJ\_SHELP IATVAVLAKKQKGTPIIVKDGAGFYVNRILAPYMNAAANLLLEGEPIEKLKALVDF GFFP  
tr|A0A1E5IXH7|A0A1E5IXH7\_SHECO IATVAVLAKKQKGTPIIVKDGAGFYVNRILAPYMNAAANLLLEGEPIEKLKALVDF GFFP  
tr|A0A411PKQ0|A0A411PKQ0\_9GAMM IATVAVLAKKQKGTPIIVKDGAGFYVNRILAPYMNAAANLLLEGEPIEKLKALVDF GFFP  
tr|A0A6G9QKM3|A0A6G9QKM3\_9GAMM IATVAVLAKKQKGTPIIVKDGAGFYVNRILAPYMNAAANLLLEGEPIEKLKALVDF GFFP  
tr|A0A6P1UL63|A0A6P1UL63\_9GAMM IATVAVLAKKQKGTPIIVKDGAGFYVNRILAPYMNAAANLLLEGEPIEKLKALVDF GFFP  
tr|A0A2N1ERI9|A0A2N1ERI9\_9GAMM IATVAVLAKKQKGTPIIVKDGAGFYVNRILAPYMNAAANLLLEGEPIEKLKALVDF GFFP  
tr|A0A7W4FU55|A0A7W4FU55\_9GAMM IATVAVLAKKQKGTPIIVKDGAGFYVNRILAPYMNAAANLLLEGEPIEKLKALVDF GFFP  
sp|Q8ECP7|FADJ\_SHEON IATVAVLAKKQKGTPIIVKDGAGFYVNRILAPYMNAAANLLLEGEPIEKLKALVDF GFFP  
tr|A0A501XZY8|A0A501XZY8\_9GAMM IATVAVLAKKQKGTPIIVKDGAGFYVNRILAPYMNAAANLLLEGEPIEKLKALVDF GFFP  
tr|A0A2W5DCZ0|A0A2W5DCZ0\_SHEOE IATVAVLAKKQKGTPIIVKDGAGFYVNRILAPYMNAAANLLLEGEPIEKLKALVDF GFFP  
tr|A0A1E3V3C8|A0A1E3V3C8\_9GAMM IATVAVLAKKQKGTPIIVKDGAGFYVNRILAPYMNAAANLLLEGEPIEKLKALVDF GFFP  
tr|A0A1Z4AI20|A0A1Z4AI20\_9GAMM IATVAVLAKKQKGTPIIVKDGAGFYVNRILAPYMNAAANLLLEGEPIEKLKALVDF GFFP  
tr|A0A7X9LJL9|A0A7X9LJL9\_9GAMM IATVAVLAKKQKGTPIIVKDGAGFYVNRILAPYMNAAANLLLEGEPIEKLKALVDF GFFP  
tr|A0A073KMY5|A0A073KMY5\_9GAMM IATVAVLAKKQKGTPIIVKDGAGFYVNRILAPYMNAAANLLLEGEPIEKLKALVDF GFFP  
sp|A0KV76|FADJ\_SHESA IATVAVLAKKQKGTPIIVKDGAGFYVNRILAPYMNAAANLLLEGEPIEKLKALVDF GFFP  
tr|A0A220UTH7|A0A220UTH7\_9GAMM IATVAVLAKKQKGTPIIVKDGAGFYVNRILAPYMNAAANLLLEGEPIEKLKALVDF GFFP  
tr|A0A5B8R6W1|A0A5B8R6W1\_9GAMM IATVAVLAKKQKGTPIIVKDGAGFYVNRILAPYMNAAANLLLEGEPIEKLKALVDF GFFP  
tr|V1DAI4|V1DAI4\_9GAMM IATVAVLAKKQKGTPIIVKDGAGFYVNRILAPYMNAAANLLLEGEPIEKLKALVDF GFFP  
tr|A0A448CPQ4|A0A448CPQ4\_SHEPU IATVAVLAKKQKGTPIIVKDGAGFYVNRILAPYMNAAANLLLEGEPIEKLKALVDF GFFP  
tr|A0A252ERQ3|A0A252ERQ3\_SHEPU IATVAVLAKKQKGTPIIVKDGAGFYVNRILAPYMNAAANLLLEGEPIEKLKALVDF GFFP  
sp|Q0HKD1|FADJ\_SHESM IATVAVLAKKQKGTPIIVKDGAGFYVNRILAPYMNAAANLLLEGEPIEKLKALVDF GFFP  
sp|Q0HWN3|FADJ\_SHESR IATVAVLAKKQKGTPIIVKDGAGFYVNRILAPYMNAAANLLLEGEPIEKLKALVDF GFFP  
tr|F7RQE3|F7RQE3\_9GAMM IATVAVLAKKQKGTPIIVKDGAGFYVNRILAPYMNAAANLLLEGEPIEKLKALVDF GFFP  
tr|B8EE98|B8EE98\_SHEB2 IATVAVLAKKQKGTPIIVKDGAGFYVNRILAPYMNAAANLLLEGEPIEKLKALVDF GFFP  
sp|A6WQ25|FADJ\_SHEB8 IATVAVLAKKQKGTPIIVKDGAGFYVNRILAPYMNAAANLLLEGEPIEKLKALVDF GFFP  
tr|A0A448EK41|A0A448EK41\_9GAMM IATVAVLAKKQKGTPIIVKDGAGFYVNRILAPYMNAAANLLLEGEPIEKLKALVDF GFFP  
tr|A0A553JHX1|A0A553JHX1\_SHEHA IATVAVLAKKQKGTPIIVKDGAGFYVNRILAPYMNAAANLLLEGEPIEKLKALVDF GFFP  
tr|B8CPY6|B8CPY6\_SHEFW IATVAVLAKKQKGTPIIVKDGAGFYVNRILAPYMNAAANLLLEGEPIEKLKALVDF GFFP  
tr|A0A431WFC4|A0A431WFC4\_9GAMM IATVAVLAKKQKGTPIIVKDGAGFYVNRILAPYMNAAANLLLEGEPIEKLKALVDF GFFP  
tr|A8FTR7|A8FTR7\_SHESH IATVAVLAKKQKGTPIIVKDGAGFYVNRILAPYMNAAANLLLEGEPIEKLKALVDF GFFP  
tr|A0A431WNL0|A0A431WNL0\_9GAMM IATVAVLAKKQKGTPIIVKDGAGFYVNRILAPYMNAAANLLLEGEPIEKLKALVDF GFFP  
tr|A0A550AEC5|A0A550AEC5\_9GAMM IATVAVLAKKQKGTPIIVKDGAGFYVNRILAPYMNAAANLLLEGEPIEKLKALVDF GFFP  
tr|A0A7L4W90|A0A7L4W90\_9GAMM IATVAVLAKKQKGTPIIVKDGAGFYVNRILAPYMNAAANLLLEGEPIEKLKALVDF GFFP  
tr|A9DDU3|A9DDU3\_9GAMM IATVAVLAKKQKGTPIIVKDGAGFYVNRILAPYMNAAANLLLEGEPIEKLKALVDF GFFP  
tr|A0A330M2B9|A0A330M2B9\_9GAMM IATVAVLAKKQKGTPIIVKDGAGFYVNRILAPYMNAAANLLLEGEPIEKLKALVDF GFFP  
tr|A0A5N8UFC7|A0A5N8UFC7\_9GAMM IATVAVLAKKQKGTPIIVKDGAGFYVNRILAPYMNAAANLLLEGEPIEKLKALVDF GFFP  
tr|A0A1S6HN57|A0A1S6HN57\_9GAMM IATVAVLAKKQKGTPIIVKDGAGFYVNRILAPYMNAAANLLLEGEPIEKLKALVDF GFFP  
tr|D4ZMH7|D4ZMH7\_SHEVD IATVAVLAKKQKGTPIIVKDGAGFYVNRILAPYMNAAANLLLEGEPIEKLKALVDF GFFP  
tr|A0A3L8Q213|A0A3L8Q213\_9GAMM IDTVAVLAKKQKGTPIIVKDGAGFYVNRILVLYMIEAAQVLLLEGEPIEKLKALVDF GFFP  
tr|A0A3A6U4N9|A0A3A6U4N9\_9GAMM IATVAVLAKKQKGTPIIVKDGAGFYVNRILAPYMNAAASVLLLEGEPIEKLKALVDF GFFP  
tr|A0A4Q5MA37|A0A4Q5MA37\_9GAMM IDTVAVLAKKQKGTPIIVKDGAGFYVNRILAPYMNAAASVLLLEGEPIEKLKALVDF GFFP  
tr|A0A1L6LSX5|A0A1L6LSX5\_9DELTA VATAVSIKQKGTPIIVKDGAGFYVNRILGPMMNAAAYLLLEGEPIEKLKALVDF GFFP  
tr|A0A2W4L9B9|A0A2W4L9B9\_9PROT VATAVALGKQKGTPIIVKDGAGFYVNRILAPYMNAAAYLLLEGEPIEKLKALVDF GFFP  
tr|A0A2W4M4E6|A0A2W4M4E6\_9PROT TRTAVAIGKQKGTPIIVKDGAGFYVNRILAPYMNAAAYLLLEGEPIEKLKALVDF GFFP  
tr|A0A6I2GRX9|A0A6I2GRX9\_9DELTA TATCVAVGRKQKGTPIIVKDGAGFYVNRILAPYMNAAAYLLLEGEPIEKLKALVDF GFFP  
tr|A0A0H4WKK2|A0A0H4WKK2\_9DELTA TATCVAVGRKQKGTPIIVKDGAGFYVNRILAPYMNAAAYLLLEGEPIEKLKALVDF GFFP  
tr|F8CJ36|F8CJ36\_MYXFH TATCVAVGRKQKGTPIIVKDGAGFYVNRILAPYMNAAAYLLLEGEPIEKLKALVDF GFFP  
tr|A0A250K0F1|A0A250K0F1\_9DELTA TATCVAVGRKQKGTPIIVKDGAGFYVNRILAPYMNAAAYLLLEGEPIEKLKALVDF GFFP  
tr|A0A7Y6WFZ2|A0A7Y6WFZ2\_9DELTA TATCVAVGRKQKGTPIIVKDGAGFYVNRILAPYMNAAAYLLLEGEPIEKLKALVDF GFFP  
tr|A0A7Y7C660|A0A7Y7C660\_9DELTA TATCVAVGRKQKGTPIIVKDGAGFYVNRILAPYMNAAAYLLLEGEPIEKLKALVDF GFFP  
tr|A0A7Y4JFH2|A0A7Y4JFH2\_MYXXA TATCVAVGRKQKGTPIIVKDGAGFYVNRILAPYMNAAAYLLLEGEPIEKLKALVDF GFFP  
tr|A0A4Y6CZQ9|A0A4Y6CZQ9\_MYXXA TATCVAVGRKQKGTPIIVKDGAGFYVNRILAPYMNAAAYLLLEGEPIEKLKALVDF GFFP



|                                |                                 |        |   |        |   |         |           |   |   |   |   |
|--------------------------------|---------------------------------|--------|---|--------|---|---------|-----------|---|---|---|---|
| tr A0A7Y4IKV5 A0A7Y4IKV5_MYXXA | TATCVEVGRKQGGKTVIVVNDGPGFFYTSRI | LAPYMN | E | AAYLLA | E | GADIAE  | LDRALVE   | F | G | F | P |
| tr A0A511HHB0 A0A511HHB0_9DELT | TATCVEVGRKQGGKTVIVVNDGPGFFYTSRI | LAPYLN | E | AAYLLA | E | GADIAE  | LDRALVE   | F | G | F | P |
| tr A0A4Y6CKY7 A0A4Y6CKY7_MYXXA | TATCVEVGRKQGGKTVIVVNDGPGFFYTSRI | LAPYMN | E | AAYLLA | E | GADIAE  | LDRALVE   | F | G | F | P |
| tr Q1D1F2 Q1D1F2_MYXXD         | TATCVEVGRKQGGKTVIVVNDGPGFFYTSRI | LAPYMN | E | AAYLLA | E | GADIAE  | LDRALVE   | F | G | F | P |
| tr A0A7Y4MA14 A0A7Y4MA14_MYXXA | TATCVEVGRKQGGKTVIVVNDGPGFFYTSRI | LAPYMN | E | AAYLLA | E | GADIAE  | LDRALVE   | F | G | F | P |
| tr A0A7T8Y4N9 A0A7T8Y4N9_MYXXA | TATCVEVGRKQGGKTVIVVNDGPGFFYTSRI | LAPYMN | E | AAYLLA | E | GADIAE  | LDRALVE   | F | G | F | P |
| tr L7UE67 L7UE67_MYXSD         | TATCVDVGRROGKTVIVVNDGPGFFYTSRI  | LAPYLN | E | AAYLLG | E | GADIAA  | LDKALVE   | F | G | F | P |
| tr A0A511T9X1 A0A511T9X1_MYXFU | TATCVEVGRKQGGKTVIVVNDGPGFFYTSRI | LAPYLN | E | AAYLLA | E | GADIAA  | LDKALVE   | F | G | F | P |
| tr A0A7Y7C9C4 A0A7Y7C9C4_9DELT | TATCVEVGRKQGGKTVIVVNDGPGFFYTSRI | LAPYMN | E | AAHLLA | E | GADIAA  | LDKALVE   | F | G | F | P |
| tr A0A540X7W8 A0A540X7W8_9DELT | TATCVEVGRKQGGKTVIVVNDGPGFFYTSRI | LAPYMN | E | AAHLLA | E | GADIAA  | LDKALVE   | F | G | F | P |
| tr A0A3A5FK19 A0A3A5FK19_9DELT | TATCVEVGRKQGGKTVIVVNDGPGFFYTSRI | LAPYMN | E | AAYLLA | E | GADITE  | LDKALVE   | F | G | F | P |
| tr A0A3A8JQL9 A0A3A8JQL9_9DELT | TATCVDVGGKQGGKTVIVVNDGPGFFYTSRI | LAPYMN | E | AAYLLA | E | GADIVQ  | LDKALVD   | F | G | F | P |
| tr A0A7Y4NFA4 A0A7Y4NFA4_9DELT | TATCVDVGGKQGGKTVIVVNDGPGFFYTSRI | LAPYMN | E | AAYLLA | E | GADIVQ  | LDKALVD   | F | G | F | P |
| tr A0A3A8HDQ7 A0A3A8HDQ7_9DELT | TATCVDVGGKQGGKTVIVVNDGPGFFYTSRI | LAPYMN | E | AAYLLA | E | GADIVQ  | LDKALVD   | F | G | F | P |
| tr A0A3A8GR90 A0A3A8GR90_9DELT | TATCVDVGGKQGGKTVIVVNDGPGFFYTSRI | LAPYMN | E | AAYLLA | E | GADIVQ  | LDKALVD   | F | G | F | P |
| tr A0A3A8SBD7 A0A3A8SBD7_9DELT | TATCVDVGGKQGGKTVIVVNDGPGFFYTSRI | LAPYMN | E | AAYLLA | E | GADIVQ  | LDKALVD   | F | G | F | P |
| tr A0A3A8T0I8 A0A3A8T0I8_9DELT | TATCVDVGGKQGGKTVIVVNDGPGFFYTSRI | LAPYMN | E | AAYLLA | E | GADIVQ  | LDKALVD   | F | G | F | P |
| tr A0A7X5BU07 A0A7X5BU07_9DELT | TATCVDVGGKQGGKTVIVVNDGPGFFYTSRI | LAPYMN | E | AAYLLA | E | GADIVQ  | LDKALVD   | F | G | F | P |
| tr A0A7Y1RVL2 A0A7Y1RVL2_9DELT | TATCVDVGGKQGGKTVIVVNDGPGFFYTSRI | LAPYMN | E | AAYLLA | E | GADIVQ  | LDKALVD   | F | G | F | P |
| tr A0A3A8THN2 A0A3A8THN2_9DELT | TATCVDVGGKQGGKTVIVVNDGPGFFYTSRI | LAPYMN | E | AAYLLA | E | GADIVQ  | LDKALVD   | F | G | F | P |
| tr A0A7Y1RX76 A0A7Y1RX76_9DELT | TATCVDVGGKQGGKTVIVVNDGPGFFYTSRI | LAPYMN | E | AAYLLA | E | GADIVQ  | LDKALVD   | F | G | F | P |
| tr A0A3A8RA58 A0A3A8RA58_9DELT | TATCVDVGGKQGGKTVIVVNDGPGFFYTSRI | LAPYMN | E | AAYLLA | E | GADIVQ  | LDKALVD   | F | G | F | P |
| tr A0A410RPB6 A0A410RPB6_CORCK | TATCVDVGGKQGGKTVIVVNDGPGFFYTSRI | LAPYMN | E | AAYLLA | E | GADIVQ  | LDKALVD   | F | G | F | P |
| tr A0A7Y4J474 A0A7Y4J474_CORCK | TATCVDVGGKQGGKTVIVVNDGPGFFYTSRI | LAPYMN | E | AAYLLA | E | GADIVQ  | LDKALVD   | F | G | F | P |
| tr A0A3A8I9Z6 A0A3A8I9Z6_9DELT | TATCVDVGGKQGGKTVIVVNDGPGFFYTSRI | LAPYMN | E | AAYLLA | E | GADIVQ  | LDKALVD   | F | G | F | P |
| tr H8MKE9 H8MKE9_CORCM         | TATCVDVGGKQGGKTVIVVNDGPGFFYTSRI | LAPYMN | E | AAYLLA | E | GADIVQ  | LDKALVD   | F | G | F | P |
| tr A0A3A8H102 A0A3A8H102_9DELT | TATCVDVGGKQGGKTVIVVNDGPGFFYTSRI | LAPYMN | E | AAYLLA | E | GADIVQ  | LDKALVD   | F | G | F | P |
| tr A0A554FW33 A0A554FW33_9DELT | TATCVDVGRKQGGKTVIVVNDGPGFFYTSRI | LAPYMN | E | AAYLLA | E | GADILQ  | LDKALVD   | F | G | F | P |
| tr A0A3A8NPC0 A0A3A8NPC0_9DELT | TATCVDVGRKQGGKTVIVVNDGPGFFYTSRI | LAPYMN | E | AAYLLA | E | GADIVQ  | LDKALVD   | F | G | F | P |
| tr A0A3A8JUV3 A0A3A8JUV3_9DELT | TATCVDVGRKQGGKTVIVVNDGPGFFYTSRI | LAPYMN | E | AAYLLA | E | GADIVQ  | LDKALVD   | F | G | F | P |
| tr A0A3A8NEX6 A0A3A8NEX6_9DELT | TATCVDVGRKQGGKTVIVVNDGPGFFYTSRI | LAPYMN | E | AAYLLA | E | GADIVQ  | LDKALVD   | F | G | F | P |
| tr A0A3A8JEU8 A0A3A8JEU8_9DELT | TATCVDVGRKQGGKTVIVVNDGPGFFYTSRI | LAPYMN | E | AAHLLA | E | GADIVQ  | LDKALVD   | F | G | F | P |
| tr A0A3A8LI76 A0A3A8LI76_9DELT | TATCVDVGRKQGGKTVIVVNDGPGFFYTSRI | LAPYMN | E | AAYLLA | E | GADIVQ  | LDKALVD   | F | G | F | P |
| tr A0A085WXN8 A0A085WXN8_9DELT | TATCVEVGRKQGGKTVIVVNDGPGFFYTSRI | LAPYMN | E | AAYLLA | E | GADIAE  | LDRALVE   | F | G | F | P |
| tr A0A2T4V0M5 A0A2T4V0M5_9DELT | TATCVEVGRKQGGKTVIVVNDGPGFFYTSRI | LAPYMN | E | AAHLLA | E | GADIAE  | LDRALVE   | F | G | F | P |
| tr A0A0G2ZSW5 A0A0G2ZSW5_9DELT | TATCVEVGRKQGGKTVIVVNDGPGFFYTSRI | LAPYMN | E | AAHLLA | E | GADIAE  | LDRALVE   | F | G | F | P |
| tr A0A3M2DKY0 A0A3M2DKY0_9DELT | TATCVALGKROGKTVIVVNDGPGFFYTSRI  | LGPYMA | E | AAQLLA | E | GAVP    | IDDIDALIQ | F | G | F | P |
| tr A0A661NQ58 A0A661NQ58_9DELT | TATCVALGKAQGGKTVIVVNDGPGFFYTSRI | LAPFMA | E | AAHLLS | E | GAAVDR  | IDDALMD   | F | G | F | P |
| tr A0A520YD99 A0A520YD99_9DELT | TATCVKLGKQGGKTVIVVNDGPGFFYTSRI  | LAPMMA | E | AAHLVA | E | EGVPIEK | IDSAMLD   | F | G | F | P |
| tr A0A7Y3BRE4 A0A7Y3BRE4_9DELT | TATCVKLGKQGGKTVIVVNDGPGFFYTSRI  | LAPMMA | E | AAHLVA | E | EGVPIEK | IDSAMLD   | F | G | F | P |
| tr A0A2D9TF90 A0A2D9TF90_9DELT | TATCVKLGKQGGKTVIVVNDGPGFFYTSRI  | LAPMMA | E | AAHILS | E | EGVAIDR | IDRALLD   | F | G | F | P |
| tr A0A2E0TF32 A0A2E0TF32_9DELT | TATCVELGKQGGKTVIVVNDGPGFFYTSRI  | LAPLMN | E | AAHILS | E | EGVAIDR | IDRALLD   | F | G | F | P |
| tr A0A2E4Y3V1 A0A2E4Y3V1_9PROT | ASLAVEMGMKQGGKTVIVVNDGPGFFYTSRI | LAPLTD | E | AAIIAL | E | EGTDLHH | INIMKD    | F | G | F | P |
| tr A0A2E6VRH4 A0A2E6VRH4_9DELT | AATAVDYGIROGKTVIVVNDGPGFFYTSRI  | LAPYMD | E | AAIALL | E | EGINPYD | LDTIMKKY  | F | G | F | P |
| tr A0A1F9FB59 A0A1F9FB59_9DELT | KALAVDVGIRQGGKTVIVVNDGPGFFYTSRI | LGPLMD | E | AAQCAL | E | EGVALHL | IDHAMRQ   | F | G | F | P |

ECHA\_HUMAN

0000000 000000..0 0000 610 000000000 630

Table with columns for ECHA\_HUMAN identifiers (e.g., tr|A0A4R6XLA8) and corresponding protein sequences (e.g., VGAAATLVDEVDVAKHV). The table lists numerous entries, each with a unique ID and a full-length amino acid sequence.

tr|A0A2D0KWM9|A0A2D0KWM9\_9GAMM|IGP|INLLDEVG|HDVGTGI|..IPVLVDQLGDR|..FTPPAILDAVLSDDRK|GKKNRGRGF|..

tr|A0A2D0LAI1|A0A2D0LAI1\_9GAMM|IGP|INLLDEVG|HDVGTGI|..IPVLVDQLGDR|..FTPPAILDAVLSDDRK|GKKNRGRGF|..

tr|A0A2D0IXC8|A0A2D0IXC8\_XENBU|IGP|INLLDEVG|HDVGTGI|..IPVLVEQLGSR|..FTPPAILDAVLDNDRK|GKKNRGRGF|..

tr|W1JAM5|W1JAM5\_9GAMM|IGP|INLLDEVG|HDVGTGI|..IPVLVEQLGSR|..FTPPAILDAVLDNDRK|GKKNRGRGF|..

tr|A0A3D9UED3|A0A3D9UED3\_9GAMM|IGP|INLLDEVG|HDVGTGI|..IPVLVEQLGSR|..FTPPAILDAVLDNDRK|GKKNRGRGF|..

tr|A0A1I3JCA9|A0A1I3JCA9\_9GAMM|IGP|INLLDEVG|HDVGTGI|..IPILVEQLGDR|..FVAPEILETLKDDRK|GKKNRGRGF|..

tr|A0A068QUL9|A0A068QUL9\_9GAMM|IGP|INLLDEVG|HDVGTGI|..IPILVEQLGSR|..FAAPEMLAAILQDDRK|GKKNRGRGF|..

tr|A0A0M0TCH6|A0A0M0TCH6\_9GAMM|IGP|INLLDEVG|HDVGTGI|..IPVLVEELGSR|..FAAPEILAAIQLDDRK|GKKNRGRGF|..

tr|A0A1Q5U854|A0A1Q5U854\_9GAMM|IGP|INLLDEVG|HDVGTGI|..IPVLVEELGSR|..FEAPEILDAILKDDRK|GKKNRGRGF|..

tr|A0A2D0ISP1|A0A2D0ISP1\_9GAMM|IGP|INLLDEVG|HDVGTGI|..IPVLVEELGSR|..FEAPEILDAILDRDRK|GKKNRGRGF|..

tr|A0A1Q5TUI8|A0A1Q5TUI8\_9GAMM|IGP|INLLDEVG|HDVGTGI|..FAAPEILAAIQLDDRK|GKKNRGRGF|..

tr|A0A2D0KJ17|A0A2D0KJ17\_9GAMM|IGP|INLLDEVG|HDVGTGI|..IPVLVEELGSR|..FEAPEILAAIQLDDRK|GKKNRGRGF|..

tr|A0A1Y2SB97|A0A1Y2SB97\_9GAMM|IGP|INLLDEVG|HDVGTGI|..IPILVEQLGSR|..FVAPEILDAILKDDRK|GKKNRGRGF|..

tr|A0A1I5DWI7|A0A1I5DWI7\_9GAMM|IGP|INLLDEVG|HDVGTGI|..IPILVEQLGSR|..FVAPEILEAILKDDRK|GKKNRGRGF|..

tr|A0A1I7GWY6|A0A1I7GWY6\_9GAMM|IGP|INLLDEVG|HDVGTGI|..IPILVEQLGSR|..FAAPEILEAILKDDRK|GKKNRGRGF|..

tr|D3VKY8|D3VKY8\_XENNA|IGP|INLLDEVG|HDVGTGI|..IPILVEQLGSR|..FVAPEILAAIQLDDRK|GKKNRGRGF|..

tr|A0A2G0Q6Q9|A0A2G0Q6Q9\_9GAMM|IGP|INLLDEVG|HDVGTGI|..IPILVEQLGSR|..FAAPEILDAILKDDRK|GKKNRGRGF|..

tr|A0A2D0JU24|A0A2D0JU24\_9GAMM|IGP|INLLDEVG|HDVGTGI|..IPILVEQLGSR|..FAAPEILEAVLKDDRK|GKKNRGRGF|..

tr|A0A0J5FN38|A0A0J5FN38\_9GAMM|IGP|INLLDEVG|HDVGTGI|..IPILVEQLGSR|..FAAPEILEAVLKDDRK|GKKNRGRGF|..

tr|A0A432XLD4|A0A432XLD4\_9GAMM|VGP|MKLMDEVG|HDVAAKV|..APIMADELGER|..FRAPDAFGKLLDDRK|GKKNRGRGF|..

tr|A0A2D8HU84|A0A2D8HU84\_9GAMM|VGP|ITLLDEVG|HDVAAKV|..APVLVEELGDR|..FEAPDAFDKLLDDRK|GKKNRGRGF|..

tr|A0A656X1Q2|A0A656X1Q2\_9GAMM|VGP|ITLLDEVG|HDVAAKV|..APVLVEELGDR|..FEAPDAFEKLLDDRK|GKKNRGRGF|..

tr|A0A4Q1QH79|A0A4Q1QH79\_9GAMM|VGP|MTLLDEVG|HDVAAKV|..APILVNELGDR|..FEAPQAFKLLDDRK|GKKNRGRGF|..

tr|A0A1G7LQE6|A0A1G7LQE6\_9GAMM|VGP|MTLLDEVG|HDVAAKV|..APILVNELGDR|..FEAPQAFKLLDDRK|GKKNRGRGF|..

tr|A0A432VYV7|A0A432VYV7\_9GAMM|VGP|MTLLDEVG|HDVAAKV|..APILVNELGDR|..FEAPQAFKLLDDRK|GKKNRGRGF|..

tr|A0A1J5N0P5|A0A1J5N0P5\_9GAMM|VGP|VTLLEDEVG|HDVGSKI|..SPILEAELGDR|..FKAPAFDALLNDDRK|GKKNRGRGF|..

tr|A0A0D8D548|A0A0D8D548\_9GAMM|VGP|MQLLDEVG|HDIGAKI|..GPILQAEELGDR|..FATPPAFDKLLADGRL|GKKNRGRGF|..

tr|A0A3E0TMM2|A0A3E0TMM2\_9GAMM|VGP|MTLLDEVG|HDIGAKI|..SPILTAELGER|..FVAPEAFDSLINDGRL|GKKNRGRGF|..

tr|A0A3E0UD67|A0A3E0UD67\_9GAMM|VGP|MQLLDEVG|HDIGAKI|..SPILTAELGER|..FVAPEAFDRLLINDGRL|GKKNRGRGF|..

tr|A0A3E0U0P4|A0A3E0U0P4\_9GAMM|VGP|MTLLDEVG|HDIGAKI|..SPILTAELGER|..FVAPEAFDRLLINDGRL|GKKNRGRGF|..

tr|A0A0M2V8B1|A0A0M2V8B1\_9GAMM|VGP|VTLLEDEVG|HDVGAKI|..SPILTEQLGER|..FAAPEAFDKLLADGRL|GKKNRGRGF|..

tr|A0A285ITY5|A0A285ITY5\_9GAMM|VGP|MTLLDEVG|HDVGAKI|..SPILTEQLGER|..FAAPEAFDKLLADGRL|GKKNRGRGF|..

tr|A0A486XTB9|A0A486XTB9\_9GAMM|VGP|VTLLEDEVG|HDVGAKI|..SPILTEQLGER|..FAAPEAFDKLLADGRL|GKKNRGRGF|..

tr|I1E1G1|I1E1G1\_9GAMM|VGP|VTLLEDEVG|HDVGAKI|..SPILTQELGER|..FSAPEAFDKLLADGRL|GKKNRGRGF|..

tr|A0A1H6KJ68|A0A1H6KJ68\_9GAMM|VGP|VTLLEDEVG|HDVGAKI|..SPILTTELGER|..FAAPEAFDKLLADGRL|GKKNRGRGF|..

tr|A0A0X3Y764|A0A0X3Y764\_9GAMM|VGP|VTLLEDEVG|HDVGAKI|..SPILTTELGER|..FAAPEAFDKLLADGRL|GKKNRGRGF|..

tr|A0A2N1YEV4|A0A2N1YEV4\_9GAMM|VGP|VTLLEDEVG|HDVGAKI|..SPILTTELGER|..FAAPEAFDKLLADGRL|GKKNRGRGF|..

tr|A0A3P3QCM3|A0A3P3QCM3\_9GAMM|VGP|ITLLDEVG|HDVGAKI|..SPILLNELGER|..FAAPEAFDRLLADGRL|GKKNRGRGF|..

tr|F7NT72|F7NT72\_9GAMM|VGP|ITLLDEVG|HDVGAKI|..SPILLKELGER|..FAAPEAFDRLLADGRL|GKKNRGRGF|..

tr|A0A3S2TW63|A0A3S2TW63\_9GAMM|VGP|ITLLDEVG|HDVGAKI|..SPILLNELGER|..FAAPEAFDRLLADGRL|GKKNRGRGF|..

tr|A0A3D5BGW7|A0A3D5BGW7\_9GAMM|VGP|ITLLDEVG|HDVGAKI|..SPILREELGER|..FKAPAFDKLLADGRL|GKKNRGRGF|..

tr|A0A5C7T117|A0A5C7T117\_9GAMM|VGP|ITLLDEVG|HDVGAKI|..SPILQELGER|..FQAPAFDKLLADGRL|GKKNRGRGF|..

tr|A0A0U4W982|A0A0U4W982\_9GAMM|VGP|ITLLDEVG|HDVGAKI|..SPILQELGER|..FQAPAFDKLLADGRL|GKKNRGRGF|..

tr|A0A2I0FCM2|A0A2I0FCM2\_9GAMM|VGP|VTLLEDEVG|HDVGAKI|..GPILKELGER|..FEAPEAFDKLLADGRL|GKKNRGRGF|..

tr|A0A2G2IVL1|A0A2G2IVL1\_9GAMM|VGP|VTLLEDEVG|HDVGAKI|..GPILKELGER|..FEAPEAFDKLLADGRL|GKKNRGRGF|..

tr|A6FT21|A6FT21\_9GAMM|VGP|VTLLEDEVG|HDVGAKI|..GPILKELGER|..FEAPEAFDKLLADGRL|GKKNRGRGF|..

tr|A0A4U1BNR2|A0A4U1BNR2\_9GAMM|VGP|ITLLDEVG|HDVGAKI|..SPILEAELGSR|..FAAPEAFDKLLADGRL|GKKNRGRGF|..

tr|E1S060|E1S060\_FERBD|VGP|VTLLEDEVG|HDVGAKI|..SPILESELGSR|..FAAPEAFDKLLADGRL|GKKNRGRGF|..

tr|A0A4Y6IZ09|A0A4Y6IZ09\_9GAMM|VGP|MTLLDEVG|HDVGAKI|..SPILEKELGER|..FKAPAFDKLLADGRL|GKKNRGRGF|..

tr|A0A0C3QSZ7|A0A0C3QSZ7\_9GAMM|VGP|MTLLDEVG|HDVGAKI|..SPILEQELGER|..FKAPAFDKLLADGRL|GKKNRGRGF|..

tr|A0A6L7HXW0|A0A6L7HXW0\_9GAMM|VGP|MTLLDEVG|HDVGAKI|..SPILEQELGER|..FKAPAFDKLLADGRL|GKKNRGRGF|..

sp|A3QFP3|FADJ\_SHELP|VGP|MTLLDEVG|HDVGAKI|..SPILEKELGER|..FKAPAFDKLLADGRL|GKKNRGRGF|..

tr|A0A1E5IXH7|A0A1E5IXH7\_SHECO|VGP|MTLLDEVG|HDVGAKI|..SPILEKELGER|..FQAPAFDKLLADGRL|GKKNRGRGF|..

tr|A0A411PKQ0|A0A411PKQ0\_9GAMM|VGP|MTLLDEVG|HDVGAKI|..SPILEKELGER|..FSAPEAFDQLLADGRL|GKKNRGRGF|..

tr|A0A6G9QKM3|A0A6G9QKM3\_9GAMM|VGP|MTLLDEVG|HDVGAKI|..SPILEKELGER|..FSAPEAFDKLLADGRL|GKKNRGRGF|..

tr|A0A6P1UL63|A0A6P1UL63\_9GAMM|VGP|MTLLDEVG|HDVGAKI|..SPILEKELGER|..FKAPAFDKLLADGRL|GKKNRGRGF|..

tr|A0A2N1ERI9|A0A2N1ERI9\_9GAMM|VGP|MTLLDEVG|HDVGAKI|..SPILEKELGER|..FKAPAFDKLLADGRL|GKKNRGRGF|..

tr|A0A7W4FU55|A0A7W4FU55\_9GAMM|VGP|MTLLDEVG|HDVGAKI|..SPILEKELGER|..FKAPAFDKLLADGRL|GKKNRGRGF|..

sp|Q8ECP7|FADJ\_SHEON|VGP|ITLLDEVG|HDVGAKI|..SPILEKELGER|..FKAPAFDKLLADGRL|GKKNRGRGF|..

tr|A0A501XZY8|A0A501XZY8\_9GAMM|VGP|ITLLDEVG|HDVGAKI|..APILEKELGER|..FKAPAFDKLLADGRL|GKKNRGRGF|..

tr|A0A2W5DCZ0|A0A2W5DCZ0\_SHEOE|VGP|ITLLDEVG|HDVGAKI|..SPILEKELGER|..FKAPAFDKLLADGRL|GKKNRGRGF|..

tr|A0A1E3V3C8|A0A1E3V3C8\_9GAMM|VGP|ITLLDEVG|HDVGAKI|..SPILEKELGER|..FKAPAFDKLLADGRL|GKKNRGRGF|..

tr|A0A1Z4AI20|A0A1Z4AI20\_9GAMM|VGP|ITLLDEVG|HDVGAKI|..APILEKELGER|..FKAPAFDKLLADGRL|GKKNRGRGF|..

tr|A0A7X9LJL9|A0A7X9LJL9\_9GAMM|VGP|ITLLDEVG|HDVGAKI|..APILEKELGER|..FKAPAFDKLLADGRL|GKKNRGRGF|..

tr|A0A073KMY5|A0A073KMY5\_9GAMM|VGP|ITLLDEVG|HDVGAKI|..APILEKELGER|..FKAPAFDKLLADGRL|GKKNRGRGF|..

sp|A0KV76|FADJ\_SHESA|VGP|ITLLDEVG|HDVGAKI|..APILEKELGER|..FKAPAFDKLLADGRL|GKKNRGRGF|..

tr|A0A220UTH7|A0A220UTH7\_9GAMM|VGP|ITLLDEVG|HDVGAKI|..APILEKELGER|..FKAPAFDKLLADGRL|GKKNRGRGF|..

tr|A0A5B8R6W1|A0A5B8R6W1\_9GAMM|VGP|ITLLDEVG|HDVGAKI|..APILEKELGER|..FKAPAFDKLLADGRL|GKKNRGRGF|..

tr|V1DAI4|V1DAI4\_9GAMM|VGP|ITLLDEVG|HDVGAKI|..APILEKELGER|..FKAPAFDKLLADGRL|GKKNRGRGF|..

tr|A0A448CPQ4|A0A448CPQ4\_SHEPU|VGP|ITLLDEVG|HDVGAKI|..APILEKELGER|..FKAPAFDKLLADGRL|GKKNRGRGF|..

tr|A0A252ERQ3|A0A252ERQ3\_SHEPU|VGP|ITLLDEVG|HDVGAKI|..APILEKELGER|..FKAPAFDKLLADGRL|GKKNRGRGF|..

sp|Q0HKD1|FADJ\_SHEMS|VGP|ITLLDEVG|HDVGAKI|..APILEKELGER|..FKAPAFDKLLADGRL|GKKNRGRGF|..

sp|Q0HWN3|FADJ\_SHESR|VGP|ITLLDEVG|HDVGAKI|..APILETELGER|..FKAPAFDKLLADGRL|GKKNRGRGF|..

tr|F7RQE3|F7RQE3\_9GAMM|VGP|ITLLDEVG|HDVGAKI|..SPILEKELGER|..FKAPAFDKLLADGRL|GKKNRGRGF|..

tr|B8EE98|B8EE98\_SHEB2|VGP|ITLLDEVG|HDVGAKI|..SPILEKELGER|..FKAPAFDKLLADGRL|GKKNRGRGF|..

sp|A6WQ25|FADJ\_SHEB8|VGP|ITLLDEVG|HDVGAKI|..SPILEKELGER|..FKAPAFDKLLADGRL|GKKNRGRGF|..

tr|A0A448EK41|A0A448EK41\_9GAMM|VGP|ITLLDEVG|HDVGAKI|..SPILEKELGER|..FKAPAFDKLLADGRL|GKKNRGRGF|..

tr|A0A553JHX1|A0A553JHX1\_SHEHA|VGP|MTLLDEVG|HDVGAKI|..SPILREELGDR|..FKAPAFDKLLADGRL|GKKNRGRGF|..

tr|B8CPY6|B8CPY6\_SHEFW|VGP|MTLLDEVG|HDVGAKI|..SPITAEELGER|..FKAPAFDKLLADGRL|GKKNRGRGF|..

tr|A0A431WFC4|A0A431WFC4\_9GAMM|VGP|MTLLDEVG|HDVGAKI|..SPILESELGER|..FKAPAFDKLLADGRL|GKKNRGRGF|..

tr|A8FTR7|A8FTR7\_SHESH|VGP|MTLLDEVG|HDVGAKI|..SPILESELGER|..FKAPAFDKLLADGRL|GKKNRGRGF|..

tr|A0A431WNL0|A0A431WNL0\_9GAMM|VGP|MTLLDEVG|HDVGAKI|..SPILESELGER|..FKAPAFDKLLADGRL|GKKNRGRGF|..

tr|A0A550AEC5|A0A550AEC5\_9GAMM|VGP|MTLLDEVG|HDVGAKI|..SPILESELGDR|..FKAPAFDKLLADGRL|GKKNRGRGF|..

tr|A0A7L4W90|A0A7L4W90\_9GAMM|VGP|MTLLDEVG|HDVGAKI|..SPILESELGDR|..FKAPAFDKLLADGRL|GKKNRGRGF|..

tr|A9DDU3|A9DDU3\_9GAMM|VGP|MTLLDEVG|HDVGAKI|..SPILAELGER|..FKAPAFDKLLADGRL|GKKNRGRGF|..

tr|A0A330M2B9|A0A330M2B9\_9GAMM|VGP|MTLLDEVG|HDVGAKI|..SPILESELGER|..FKAPAFDKLLADGRL|GKKNRGRGF|..

tr|A0A5N8UFC7|A0A5N8UFC7\_9GAMM|VGP|MTLLDEVG|HDVGAKI|..SPILESELGER|..FKAPAFDKLLADGRL|GKKNRGRGF|..

tr|A0A1S6HN57|A0A1S6HN57\_9GAMM|VGP|MTLLDEVG|HDVGAKI|..SPILESELGER|..FKAPAFDKLLADGRL|GKKNRGRGF|..

tr|D4ZMH7|D4ZMH7\_SHEVD|VGP|MTLLDEVG|HDVGAKI|..SPILESELGER|..FKAPAFDKLLADGRL|GKKNRGRGF|..

tr|A0A3L8Q213|A0A3L8Q213\_9GAMM|VGP|INLLDEVG|HDVGAKI|..SPILEKELGSR|..FKAPDVYEKLLADGRL|GKKNRGRGF|..

tr|A0A3A6U4N9|A0A3A6U4N9\_9GAMM|VGP|MTLLDEVG|HDVGAKI|..SPILEKELGER|..FVAPEAFDKLLADGRL|GKKNRGRGF|..

tr|A0A4Q5MA37|A0A4Q5MA37\_9GAMM|VGP|MTLLDEVG|HDVGAKI|..SPILEKELGER|..FEAPEAFDKLLADGRL|GKKNRGRGF|..

tr|A0A1L6LSX5|A0A1L6LSX5\_9DELTA|VGP|VTLLEDEVG|HDVAHV|..GPIMVAFAFGER|..MIPPPMAKLVADGRL|GKKNRGRGF|..

tr|A0A2W4L9B9|A0A2W4L9B9\_9PROT|VGP|VTLLEDEVG|HDVASV|..TRTMVEAFGER|..MLPPDAFERVADGRL|GKKNRGRGF|..

tr|A0A2W4M4E6|A0A2W4M4E6\_9PROT|VGP|LALLEDEVG|HDVASKV|..GKILHSFAR|..MAPPPAVEQLLADGRL|GKKNRGRGF|..

tr|A0A6I2GRX9|A0A6I2GRX9\_9DELTA|VGP|ITLLDEVG|HDVAHV|..GPIMQAAAFGER|..LAAPEGLDVAVADGRL|GKKNRGRGF|..

tr|A0A0H4WKK2|A0A0H4WKK2\_9DELTA|VGP|ITLLDEVG|HDVAQKV|..GPIMEAAAFGER|..MAAPKALEKVVADGRL|GKKNRGRGF|..

tr|F8CJ36|F8CJ36\_MYXFX|VGP|MTLLDEVG|HDVAQKV|..GPIMEAAAFGER|..MAAPKALEKVVADGRL|GKKNRGRGF|..

tr|A0A250K0F1|A0A250K0F1\_9DELTA|VGP|MTLLDEVG|HDVAQKV|..GPIMEAAAFGER|..MAAPKALEKVVADGRL|GKKNRGRGF|..

tr|A0A7Y6WFZ2|A0A7Y6WFZ2\_9DELTA|VGP|ITLLDEVG|HDVAQKV|..GPIMEAAAFGER|..MAAPKALEKVVADGRL|GKKNRGRGF|..

tr|A0A7Y7C660|A0A7Y7C660\_9DELTA|VGP|ITLLDEVG|HDVAQKV|..GPIMEAAAFGER|..MAAPKALEKVVADGRL|GKKNRGRGF|..

tr|A0A7Y4JFH2|A0A7Y4JFH2\_MYXXA|VGP|ITLLDEVG|HDVAQKV|..GPIIMEAAAFGER|..MAAPKALEKVVADGRL|GKKNRGRGF|..

tr|A0A4Y6CZQ9|A0A4Y6CZQ9\_MYXXA|VGP|ITLLDEVG|HDVAQKV|..GPIIMEAAAFGER|..MAAPKALEKVVADGRL|GKKNRGRGF|..

tr|A0A7Y4IKV5|A0A7Y4IKV5\_MYXXA VGPITLLDEVGHDVAQKV..GPIMEAAF GKR..MAAPKALEKVVADGRLGRKTQKGFY..  
tr|A0A511HHB0|A0A511HHB0\_9DELT VGPITLLDEVGHDVAQKV..GPIMEAAF GKR..MAAPKALEKVVADGRLGRKTQKGFY..  
tr|A0A4Y6CKY7|A0A4Y6CKY7\_MYXXA VGPITLLDEVGHDVAQKV..GPIMEAAF GKR..MAAPKALEKVVADGRLGRKTQKGFY..  
tr|Q1D1F2|Q1D1F2\_MYXXD VGPITLLDEVGHDVAQKV..GPIMEAAF GKR..MAAPKALEKVVADGRLGRKTQKGFY..  
tr|A0A7Y4MA14|A0A7Y4MA14\_MYXXA VGPITLLDEVGHDVAQKV..GPIMEAAF GKR..MAAPKALEKVVADGRLGRKTQKGFY..  
tr|A0A7T8Y4N9|A0A7T8Y4N9\_MYXXA VGPITLLDEVGHDVAQKV..GPIMEAAF GKR..MAAPKALEKVVADGRLGRKTQKGFY..  
tr|L7UB67|L7UB67\_MYXSD VGPMTLLDEVGHDVAHKV..GPIIMEAAF GKR..MAAPKALDVAVVEGRLGRKSQKGFY..  
tr|A0A511T9X1|A0A511T9X1\_MYXFU VGPMTLLDEVGHDVAHKV..SPMMEAAF GKR..MVAPKALDGVVADGRLGRKSQKGFY..  
tr|A0A7Y7C9C4|A0A7Y7C9C4\_9DELT VGPMTLLDEVGHDVAHKV..GPIMEAAF GKR..MAAPKSLDGVVADGRLGRKSQKGFY..  
tr|A0A540X7W8|A0A540X7W8\_9DELT VGPMTLLDEVGHDVAHKV..GPIMEAAF GKR..MSAPKSLDGVVADGRLGRKSQKGFY..  
tr|A0A3A5FK19|A0A3A5FK19\_9DELT VGPITLLDEVGHDVAHKV..GPIMEGAF GKR..MAAPKALDGVVADGRLGRKTQKGFY..  
tr|A0A3A8JQL9|A0A3A8JQL9\_9DELT VGPITLLDEVGHDVAQKV..GPIMEAAF GKR..MSAPKALEGVVSDGRLGRKTNNKGFY..  
tr|A0A7Y4NFA4|A0A7Y4NFA4\_9DELT VGPITLLDEVGHDVAQKV..GPIMEAAF GKR..MAAPKALEGVVSDGRLGRKTNNKGFY..  
tr|A0A3A8HDQ7|A0A3A8HDQ7\_9DELT VGPITLLDEVGHDVAQKV..GPIMEAAF GKR..MAAPKALEGVVSDGRLGRKTNNKGFY..  
tr|A0A3A8GR90|A0A3A8GR90\_9DELT VGPITLLDEVGHDVAQKV..GPIMEAAF GKR..MAAPKALEGVVSDGRLGRKTNNKGFY..  
tr|A0A3A8SBD7|A0A3A8SBD7\_9DELT VGPITLLDEVGHDVAQKV..GPIMEAAF GKR..MVAPKALAGVVSDGRLGRKTNNKGFY..  
tr|A0A3A8T0I8|A0A3A8T0I8\_9DELT VGPITLLDEVGHDVAQKV..GPIMEAAF GKR..MVAPKALAGVVSDGRLGRKTNNKGFY..  
tr|A0A7X5BU07|A0A7X5BU07\_9DELT VGPITLLDEVGHDVAQKV..GPIMEAAF GKR..MVAPKALAGVVSDGRLGRKTNNKGFY..  
tr|A0A7Y1RVL2|A0A7Y1RVL2\_9DELT VGPITLLDEVGHDVAQKV..GPIMEAAF GKR..MVAPKALAGVVSDGRLGRKTNNKGFY..  
tr|A0A3A8THN2|A0A3A8THN2\_9DELT VGPITLLDEVGHDVAQKV..GPIMEAAF GKR..MVAPKALAGVVSDGRLGRKTNNKGFY..  
tr|A0A7Y1RX76|A0A7Y1RX76\_9DELT VGPITLLDEVGHDVAQKV..GPIMEAAF GKR..MVAPKALAGVVSDGRLGRKTNNKGFY..  
tr|A0A3A8RA58|A0A3A8RA58\_9DELT VGPITLLDEVGHDVAQKV..GPIMEAAF GKR..MAAPKALEGVVSDGRLGRKTNNKGFY..  
tr|A0A410RPB6|A0A410RPB6\_CORCK VGPITLLDEVGHDVAQKV..GPIMEAAF GKR..MAAPKALEGVVSDGRLGRKTNNKGFY..  
tr|A0A7Y4J474|A0A7Y4J474\_CORCK VGPITLLDEVGHDVAQKV..GPIMEAAF GKR..MAAPKALEGVVSDGRLGRKTNNKGFY..  
tr|A0A3A8I9Z6|A0A3A8I9Z6\_9DELT VGPITLLDEVGHDVAQKV..GPIMEAAF GKR..MAAPKALEGVVSDGRLGRKTNNKGFY..  
tr|H8MKE9|H8MKE9\_CORCM VGPITLLDEVGHDVAQKV..GPIMEAAF GKR..MAAPKALEGVVSDGRLGRKTNNKGFY..  
tr|A0A3A8H102|A0A3A8H102\_9DELT VGPITLLDEVGHDVAQKV..GPIMEAAF GKR..MAAPKALEGVVSDGRLGRKTNNKGFY..  
tr|A0A554FW33|A0A554FW33\_9DELT VGPITLLDEVGHDVAQKV..GPVMEAAF GKR..MAAPKALEGVVSDGRLGRKTQKGFY..  
tr|A0A3A8NPC0|A0A3A8NPC0\_9DELT VGPITLLDEVGHDVAQKV..GPIMEAAF GKR..MSAPKALEGVVSDGRLGRKTQKGFY..  
tr|A0A3A8JUV3|A0A3A8JUV3\_9DELT VGPITLLDEVGHDVAQKV..GPIMEAAF GKR..MSAPKALEGVVSDGRLGRKTQKGFY..  
tr|A0A3A8NEX6|A0A3A8NEX6\_9DELT VGPITLLDEVGHDVAQKV..GPIMEAAF GKR..MAAPKALEGVVSEGRLLGRKTQKGFY..  
tr|A0A3A8JEU8|A0A3A8JEU8\_9DELT VGPITLLDEVGHDVAQKV..GPIMEAAF GKR..MAAPKALDGVISDGRLLGRKTQKGFY..  
tr|A0A3A8LI76|A0A3A8LI76\_9DELT VGPITLLDEVGHDVAQKV..GPIMEAAF GKR..MAAPKALEGVISDGRLLGRKTQKGFY..  
tr|A0A085WXN8|A0A085WXN8\_9DELT VGPITLLDEVGHDVAYKV..GPIMEAAF GKR..LAAPKTLDKVIQDGRLLGRKNQKGFY..  
tr|A0A2T4V0M5|A0A2T4V0M5\_9DELT VGPITLLDEVGHDVAQKV..GPIMEAAF GKR..MSAPRALEKVVADGRLGRKNKKGFY..  
tr|A0A0G2ZSW5|A0A0G2ZSW5\_9DELT VGPITLLDEVGHDVAQKV..GPIMETAFA GKR..MAAPRALEKVVADGRLGRKNKKGFY..  
tr|A0A3M2DKY0|A0A3M2DKY0\_9DELT VGPITALLDEVGHDVAHKV..GQIAADAF GDR..MPPMQGLDALIADGRHGRKNKGFY..  
tr|A0A661NQ58|A0A661NQ58\_9DELT VGP IKLTDEVGHDVGA KV..GKILLAEF GER..MQAPAGIDKLVQDDRKGRKNRGRGFY..  
tr|A0A520YD99|A0A520YD99\_9DELT VGP IKLTDEVGHDVGA KV..GKIMLEAF GER..MAAPEGMKKLIDDERFGRKNRGRGFY..  
tr|A0A7Y3BRE4|A0A7Y3BRE4\_9DELT VGP IKLTDEVGHDVGA KV..GKIMLEAF GER..MAAPEGMKKLIDDERFGRKNRGRGFY..  
tr|A0A2D9TF90|A0A2D9TF90\_9DELT VGP MKLITDEVGHDVGA KV..GKIMVQAF GDR..MVPAGMKLVADDRKGRKNRGRGFY..  
tr|A0A2E0TP32|A0A2E0TP32\_9DELT VGP IKLTDEVGHDVGA KV..GKVMQKAF GDR..MTPAGMEKLVADDRKGRKNRGRGFY..  
tr|A0A2E4Y3V1|A0A2E4Y3V1\_9PROT VGPITLCEDEVGHDVAMHI..AKDLKKAALGERIC SAPSELIDDLVKNMNMGRKSGKGFY..  
tr|A0A2E6VRH4|A0A2E6VRH4\_9DELT VGPVTLDEVGHDVGAHV..SKDLGAAFGERVVSADPRAVQALVETGAHGRKSQKGFY..  
tr|A0A1F9FB59|A0A1F9FB59\_9DELT VGPITLLDEVGHDVAAHV..SKDMAPFFEP RFGPRDRSALEAMVKEGFTGRKGGKGFY..

| ECHA_HUMAN       |                  | 640                 | 650              | 660            |
|------------------|------------------|---------------------|------------------|----------------|
| tr A0A4R6XLA8    | A0A4R6XLA8_9GAMM | IYQ.E.GVK.RK        | DLNSDMSILASLKL   | PP.KSEV.       |
| tr A0A6A01JT2    | A0A6A01JT2_9BACT | VYP.KDKG.KK         | GKRTVNQEIYKYFG   | GD.DRDK.       |
| tr A0A7V3QZU7    | A0A7V3QZU7_9BACT | LYP.PRG.KR          | GKKPLNPEMLPLIG   | GP.DRRP.       |
| tr A0A7V4SYJ6    | A0A7V4SYJ6_9BACT | LYP.PRG.KR          | GKKRPNAEYVGLLG   | GV.PRRP.       |
| tr A0A2A8D2N6    | A0A2A8D2N6_9BACT | LYG.RR.RR           | GAKPVNEAVYLLG    | GA.PRRE.       |
| tr A0A2N1TGP0    | A0A2N1TGP0_9SPIR | FYE.P.QPGK.PEK      | KRTKFNDAYVRHFG   | GK.NRST.       |
| tr A0A1G3QG4     | A0A1G3QG4_9SPIR  | RYD.VPS.KK          | GKRPVNTEVVALFS   | GS.PRKN.       |
| tr A0A1G3QTY3    | A0A1G3QTY3_9SPIR | RYD.LP.K.KK         | GEKPVNSEVYSLFSD  | VP.RKK.        |
| tr A0A7X9L359    | A0A7X9L359_9DELT | LYE.EP.GRKGLLALKRKK | GKPVNTAVYALFG    | DA.QRKK.       |
| tr A0A522CJY0    | A0A522CJY0_9SPIR | RYD.VPK.KK          | GKPVNTEVYVILG    | GA.RRV.        |
| tr A0A2N1RRJ3    | A0A2N1RRJ3_9SPIR | RYD.VPK.KK          | GVRASDPDIYRVLGN  | AP.RKK.        |
| tr A0A2N2KFN7    | A0A2N2KFN7_9DELT | RYD.VPK.KK          | GKIPNAAEYVALIG   | GA.PRQ.        |
| tr A0A1V6AXX9    | A0A1V6AXX9_9DELT | RYD.VPK.KK          | GKIPNAAEYVALIG   | GA.PRRK.       |
| tr A0A2N2HZL0    | A0A2N2HZL0_9DELT | LYD.A.KKKK          | GKIPNAAEYVALIG   | AP.RKK.        |
| tr A0A5E8ARP3    | A0A5E8ARP3_9BACT | QYD.GKTG.KK         | VRGKVNEEALRFIE   | SR.GSKA.       |
| tr A0A662A7B1    | A0A662A7B1_9BACT | IYD.E.KTG.KK        | VRGKINPDIKEFFPT  | .KSNN.         |
| tr D7CV16 D7CV16 | TRURR            | DYS.SG.KK           | GEKAVNEEYVRFSS   | AP.RKE.        |
| tr A0A3C2AKX4    | A0A3C2AKX4_9FLAO | KYD.EN.GK           | NMRELDNDDVYVFFG  | GN.NRKK.       |
| tr A0A3B8ZLN3    | A0A3B8ZLN3_9PLAN | QYD.S.KG.KK         | IRDKLDDNDDVYVFFG | GS.QRQK.       |
| tr A0A345UGV8    | A0A345UGV8_9BACT | RYG.EG.KG           | KKKEINPDIYAHFG   | GT.SRKK.       |
| tr A0A6C1P6A2    | A0A6C1P6A2_9BACT | TYS.GKGG            | KKKEVNQDYYVFFG   | GP.KRRP.       |
| tr A0A3MLX9W8    | A0A3MLX9W8_9BACT | LYK.LXW8.GKK        | GRREVNPAVYRLLFG  | GR.KRKR.       |
| tr A0A354C796    | A0A354C796_9DELT | RYG.D.TAGK          | KKKEVNKEIYVFFG   | GP.GRKK.       |
| tr A0A3M1NUM8    | A0A3M1NUM8_9BACT | LYD.QK.GR           | KQKEVDQTYVRYVFFG | GT.QRKK.       |
| tr A0A3M2KRC8    | A0A3M2KRC8_9BACT | HYP.AGSPKLPVPGSK    | RKEVNQTYVYVFFG   | GV.KRRK.       |
| tr A0A5S9IHR0    | A0A5S9IHR0_9BACT | LYP.KKKK            | KKKTINTDIYRFFG   | GN.SRKT.       |
| tr A0A6M1ST81    | A0A6M1ST81_9BACT | NYE.QONS.KK         | KKKDPNEEYKYVFFG  | GS.GRKS.       |
| tr A0A521AAE5    | A0A521AAE5_9BACT | HYE.EE.DN           | KKKDPNNEIYRFFG   | GP.KRST.       |
| tr A0A1M4ZMD6    | A0A1M4ZMD6_9BACT | HYE.EEG.S.KT        | KKKEPNKKIYVFFG   | GP.DRSS.       |
| tr A0A2A2GCS2    | A0A2A2GCS2_9BACT | KYE.QKNG.KM         | KKTDPNKEIYQVFFG  | GS.DRKS.       |
| tr A0A5D3YIH7    | A0A5D3YIH7_9BACT | TYE.EK.DG           | KKGDPNKQMYQVFFG  | GP.NRST.       |
| tr A0A6M1T9G0    | A0A6M1T9G0_9BACT | RYK.QENG.KT         | KKDEPNNEIYVFFG   | GS.GRTS.       |
| tr A0A6A8Q1Y8    | A0A6A8Q1Y8_9BACT | KYA.DS              | KKKEVNQDYYVFFG   | GS.ERKN.       |
| tr A0A521BVJ3    | A0A521BVJ3_9BACT | RYF.DD              | KDKEVNQDYYVFFG   | GS.NRTN.       |
| tr A0A359E0Y8    | A0A359E0Y8_9BACT | KYS.SG              | KKKEVNTEIYVFFG   | GS.NRTN.       |
| tr A0A2D8CIM6    | A0A2D8CIM6_9BACT | KYS.SG              | KKKEVNTEIYVFFG   | GS.NRTN.       |
| tr A0A2D9FWF5    | A0A2D9FWF5_9BACT | LYS.ED              | DDKKVNQDYYVFFG   | GQ.DRTD.       |
| tr A0A1B6YB70    | A0A1B6YB70_9BACT | SYS.GG              | KKKEVNQDYYVFFG   | GT.NRTK.       |
| tr A0A2D4ZTC0    | A0A2D4ZTC0_9BACT | SYA.DG              | KKKEVNTEIYVFFG   | GT.NRTN.       |
| tr A0A3D4UVW7    | A0A3D4UVW7_9BACT | SYA.DG              | KKKEVNTEIYVFFG   | GT.NRTN.       |
| tr A0A3F3I3M2    | A0A3F3I3M2_9BACT | SYA.DG              | KKKEVNTEIYVFFG   | GT.NRTN.       |
| tr A0A3D1G7L9    | A0A3D1G7L9_9BACT | TYE.S               | KKKQVNTDIYQVFFG  | GS.ARSN.       |
| tr A0A3M8G1Y8    | A0A3M8G1Y8_9BACT | NYD.G               | KKKSPNSDIYVFFG   | GS.SRNN.       |
| tr A0A5Q4F391    | A0A5Q4F391_9BACT | LYP.SG.KG           | KKKKVNRAIYVFFG   | GE.KRKK.       |
| tr A0A6I7NPV0    | A0A6I7NPV0_9BACT | IYE.EG.SK           | KKKKVNTEIYVFFG   | GE.DRQK.       |
| tr A0A651G1J2    | A0A651G1J2_9BACT | RYE.AG.SK           | KKKEVNKEIYVFFG   | DS.ARKD.       |
| tr A0A371QRK5    | A0A371QRK5_9BACT | KYG.DGS             | KKKEINNEIYVFFG   | GT.TRKE.       |
| tr A0A2N0VGJ5    | A0A2N0VGJ5_9BACT | TYE.DGS             | KKKEVNREIYVFFG   | GQ.DRKS.       |
| tr A0A316TYJ0    | A0A316TYJ0_9BACT | VYE.SG.SGDKK        | KKKEVNTEIYVFFG   | GS.DRRS.       |
| tr A0A651GLZ8    | A0A651GLZ8_9BACT | RYE.ES.SK           | KKKEINPDIYVFFG   | GA.NRKS.       |
| tr A0A7Y5V3S5    | A0A7Y5V3S5_9BACT | TYD.ATG             | KKGAVDASVYLLA    | TP.NRSP.       |
| tr A0A7W1SHC0    | A0A7W1SHC0_9BACT | LYG.SNG             | KKGDVDTIYVVMG    | GR.ERRD.       |
| tr A0A7Y5PBT7    | A0A7Y5PBT7_9BACT | QYD.DAG             | TKNGVDFSVYLLPN   | GA.ARVE.       |
| tr A0A7Y5TXL8    | A0A7Y5TXL8_9BACT | QYD.DAG             | TKNGVDFSVYLLPN   | GA.ARVE.       |
| tr A0A423PQ96    | A0A423PQ96_9GAMM | DYT.AKTGG           | EKRANADLERLLAQ   | QRDGGRA.       |
| tr U2G066 U2G066 | 9GAMM            | DYT.AK.RKKG         | AKRPVNPELATLLAD  | DRQGVRA.       |
| tr A0A2E0J1F4    | A0A2E0J1F4_9GAMM | DYT.A.PKK           | EKRPINADLDTLLA   | GERDGGRA.      |
| tr A0A2D4SCM8    | A0A2D4SCM8_9GAMM | VYD.G.KKSK          | GAKPVNTAVYKLMGV  | SADNHQ0.       |
| tr L0WJH1 L0WJH1 | 9GAMM            | IYE.GVAK            | GEKPVNTALYELMNV  | TT.SRDA.       |
| tr A0A1H5XF61    | A0A1H5XF61_9GAMM | IYE.G.VAK.AK        | GEKPVNTALYELMNV  | SQ.EKD.        |
| tr A0A2E9TS48    | A0A2E9TS48_9GAMM | IYE.GVAK            | GEKPVNTALYELMNV  | TS.EKDA.       |
| tr A0A095UE19    | A0A095UE19_9GAMM | IYE.GVAK            | GEKPVNTALYELMNV  | TS.EKDA.       |
| tr A0A7G2S9A0    | A0A7G2S9A0_9GAMM | IYE.GVAK            | GEKPVNTALYELMNV  | TS.EKDA.       |
| tr B5JU27 B5JU27 | 9GAMM            | LYG.DGV             | KKKPVNQEYVFDAMNV | TP.WKN.        |
| tr A0A1Y0IHP1    | A0A1Y0IHP1_9GAMM | LYG.PEH             | KKKPVNDVAVYVVMGV | SA.SRK.        |
| tr A0A316FZ14    | A0A316FZ14_9GAMM | RYD.D.DS.K          | GKREVDSEIYQLLGI  | TR.DHS.        |
| tr A0A498C231    | A0A498C231_9GAMM | RYD.R.KR.GK         | GGRPVDEGVYRLLGV  | TP.HAE.        |
| tr Q0A6T4 Q0A6T4 | ALKEH            | RYD.R.KR.GK         | GGRPVDEGVYRLLGV  | AP.GRD.        |
| tr A0A3E0WL10    | A0A3E0WL10_9GAMM | KYE.GV.KK           | GKKEVDTEYDVLGV   | KP.DNSM.       |
| tr A0A3S1BU16    | A0A3S1BU16_9GAMM | LYE.GV.KK           | GKQVDSVYAVLGV    | SG.DKSI.       |
| tr A0A7V8QFN9    | A0A7V8QFN9_9GAMM | DYS.G.KS            | GKGDVDEAVYKLLGV  | EP.TGS.        |
| tr A0A1H8PPF9    | A0A1H8PPF9_9GAMM | QYG.G.KK.KK         | GKAVDSEIYVLSLI   | DP.SNK.        |
| tr A0A6H0J0V7    | A0A6H0J0V7_9GAMM | KYG.G.KK.KK         | GKAVDSEIYVLSLI   | DP.SNK.        |
| tr V5EZK6 V5EZK6 | 9VIBR            | QYK.G               | KDKKVDKSVYKLLKL  | TP.SRSI.       |
| tr A0A611QBM2    | A0A611QBM2_9VIBR | QYK.G               | KDKKVDKSVYKLLKL  | TP.SRSI.       |
| tr A0A511QRL5    | A0A511QRL5_9VIBR | QYK.G               | KDKKVDKSVYKLLKL  | TP.SRSI.       |
| tr A0A7Y0JZP4    | A0A7Y0JZP4_9VIBR | QYK.G               | KDKKVDKSVYKLLKL  | TP.SRSI.       |
| tr A0A193KD24    | A0A193KD24_9VIBR | QYK.G               | KDKKVDKSVYKLLKL  | TP.SRSI.       |
| tr A0A1S1HM72    | A0A1S1HM72_PROST | LYE.H.QASSKLFVWKA   | HKRQVDKSVYKLLGI  | HP.QNH.        |
| tr A0A7T8I613    | A0A7T8I613_9GAMM | LYE.H.QASSKLFVWKA   | HKRQVDKSVYKLLGI  | HP.QNH.        |
| tr A0A140NIF0    | A0A140NIF0_PROSM | LYG.H.QPSTKLMFVWKA  | KKRQVDSSIYSLIGI  | QP.QNH.        |
| tr A0A379GMB7    | A0A379GMB7_PROST | LYG.H.QPSTKLMFVWKA  | KKRQVDSSIYSLIGI  | QP.QNH.        |
| tr A0A379H393    | A0A379H393_PROST | LYG.H.QPSTKLMFVWKA  | KKRQVDSSIYSLIGI  | QP.QNH.        |
| tr B2Q0L5 B2Q0L5 | PROST            | LYG.H.QPASKLMFVWKA  | KKRQVDSSIYSLIGI  | QP.QNH.        |
| tr A0A6I3JUE9    | A0A6I3JUE9_9GAMM | LYG.H.QPSSKLFVWKA   | KKRQVDKSVYKLLGI  | HP.KNH.        |
| tr A0A7D4P594    | A0A7D4P594_YERMW | LYP.T.QSRG          | IKWKRN           | SGKQVDSVYVLLGV |
| tr A0A7U7IVK6    | A0A7U7IVK6_YEREN | LYP.A.KN.SGF.KWKR   | SGKQVDSVYVLLGV   | TP.KAH.        |
| tr A0A447RIF5    | A0A447RIF5_YEREN | LYP.A.KN.SGF.KWKR   | SGKQVDSVYVLLGV   | TP.KAH.        |
| tr A0A7H4ZLV9    | A0A7H4ZLV9_YERP4 | LYP.A.KN.SGF.KWKR   | SGKQVDSVYVLLGV   | TP.KAH.        |
| tr A0A0H3NX46    | A0A0H3NX46_YERE1 | LYP.A.KN.SGF.KWKR   | SGKQVDSVYVLLGV   | TP.KAH.        |
| tr A0A7T9XUV7    | A0A7T9XUV7_YEREN | LYP.A.KN.SGF.KWKR   | SGKQVDSVYVLLGV   | TP.KAH.        |
| tr A0A7U7IYV8    | A0A7U7IYV8_YEREN | LYP.A.KN.SGF.KWKR   | SGKQVDSVYVLLGV   | TP.KAH.        |
| tr A0A0H5G7G2    | A0A0H5G7G2_YEREN | LYP.A.KN.SGF.KWKR   | SGKQVDSVYVLLGV   | TP.KAH.        |
| tr A0A2A7TDI2    | A0A2A7TDI2_YERKR | LYP.A.TS.RGF.KWKS   | PKQVDSVYVLLGV    | TP.KAH.        |
| tr A0A0T9M261    | A0A0T9M261_YERKR | LYP.A.TS.RGF.KWKS   | PKQVDSVYVLLGV    | TP.KAH.        |
| tr A0A0A0CMP1    | A0A0A0CMP1_PHOLU | LPA.S.EA.RKFVQFGKK  | G.KKVDSSIYLLNI   | TP.ESH.        |
| tr A0A329VG55    | A0A329VG55_9GAMM | LPA.P.GP.RKFVQFGKR  | D.KKVDSSVYLLNI   | TP.ESH.        |
| tr Q7N288 FADJ   | PHOLL            | LPA.P.GP.RKFVQFGKR  | D.KKVDSSVYLLNI   | TP.ESH.        |
| tr A0A6L9JMX5    | A0A6L9JMX5_PHOLM | LPA.P.GP.RKFVQFGKR  | D.KKVDSSVYLLNI   | TP.ESH.        |
| tr A0A7X5HQ29    | A0A7X5HQ29_PHOLM | LPA.P.GP.RKFVQFGKR  | D.KKVDSSVYLLNI   | TP.ESH.        |
| tr A0A1C0U051    | A0A1C0U051_9GAMM | LYT.SETRFWRIGKK     | GKVDSSIYLLNI     | TP.ESRM.       |
| tr A0A7X5QF62    | A0A7X5QF62_9GAMM | LYT.SESRKSWRIGKK    | GKVDSSVYALLNI    | KP.ESRM.       |

tr|A0A2D0KWM9|A0A2D0KWM9\_9GAMM . . . . . S Y A . . . . . T . . . . . K K . S K F W S L R K N . . . . . S . K E A D S S I Y S L L K V . . . . . Q P . . V A K .  
tr|A0A2D0LAI1|A0A2D0LAI1\_9GAMM . . . . . S Y A . . . . . T K K S K F W S L R K N . . . . . S . K E A D S S I Y S L L K V . . . . . Q P . . V A K .  
tr|A0A2D0IXC8|A0A2D0IXC8\_XENBU . . . . . S Y E . . . . . V . . . . . K K . T R F W S F R K S . . . . . S . K E V D S S I Y S L L K I . . . . . K P . . N A K .  
tr|W1JAM5|W1JAM5\_9GAMM . . . . . S Y E . . . . . V . . . . . K K . S R F W S F G K S . . . . . S . K E V D S S I Y S L L K I . . . . . K P . . N A R .  
tr|A0A3D9UED3|A0A3D9UED3\_9GAMM . . . . . S Y E . . . . . V . . . . . V K K S R F W S F G K S . . . . . S . K E V D S S I Y S L L K I . . . . . K P . . N A R .  
tr|A0A1I3JCA9|A0A1I3JCA9\_9GAMM . . . . . S Y A . . . . . . . . . . G K K G M F A S F G K . . . . . K S K Q V D V S I Y S L L K I . . . . . K P . . A V N .  
tr|A0A068QUL9|A0A068QUL9\_9GAMM . . . . . L Y A . . . . . N . . . . . K K . R A F W P F G K K . . . . . S K K E A D A S V Y A L L N I . . . . . K P . . A I K .  
tr|A0A0M0TCH6|A0A0M0TCH6\_9GAMM . . . . . L Y T . . . . . . . . . . S R K L Y T S R K . . . . . K S K E V D A S I Y S L L K I . . . . . K P . . A I K .  
tr|A0A1Q5U854|A0A1Q5U854\_9GAMM . . . . . L Y A . . . . . S . . . . . K K . S S F W S F G K K . . . . . S N K E V D A S I Y S L L K I . . . . . K P . . A I K .  
tr|A0A2D0ISP1|A0A2D0ISP1\_9GAMM . . . . . L Y A . . . . . S . . . . . K K . S S F W P F G K K . . . . . P N K E V D A S I Y S L L K I . . . . . K P . . A I K .  
tr|A0A1Q5TUI8|A0A1Q5TUI8\_9GAMM . . . . . A S N K L Y A . . . . . N . . . . . K K . S S F W P F G K K . . . . . S N K E V D A S V Y S L L K I . . . . . K P . . A I K .  
tr|A0A2D0KJI7|A0A2D0KJI7\_9GAMM . . . . . L Y A . . . . . N . . . . . K K . S S F W P F G K K . . . . . S N K E V D T S I Y S L L K I . . . . . K P . . D I K .  
tr|A0A1Y2SB97|A0A1Y2SB97\_9GAMM . . . . . L Y T . . . . . N . . . . . K K . G S F W S F G K K . . . . . A . K Q V D V S I Y S L L K I . . . . . K P . . A V K .  
tr|A0A1I5DWI7|A0A1I5DWI7\_9GAMM . . . . . S Y A . . . . . . . . . . N K K G S F W S F G K K . . . . . A R E V D A S I Y S L L K I . . . . . K P . . A V K M .  
tr|A0A1I7GWY6|A0A1I7GWY6\_9GAMM . . . . . S Y V . . . . . D . . . . . K K . G F F K S F G K T . . . . . S . K E V D T S I Y S L L K I . . . . . R P . . A A K .  
tr|D3VKY8|D3VKY8\_XENNA . . . . . S Y V . . . . . S . . . . . K K . G L L K F F S K G . . . . . I . K E V D E S I Y S L L K I . . . . . K P . . A A K .  
tr|A0A2G0Q6Q9|A0A2G0Q6Q9\_9GAMM . . . . . S Y T . . . . . N . . . . . K K . S S F W S F G K Q . . . . . A . K E V D S S I Y S L L K I . . . . . K P . . A V K .  
tr|A0A2D0JU24|A0A2D0JU24\_9GAMM . . . . . S Y A . . . . . N . . . . . K K . N K F W S F G K K . . . . . P . K E V D V S I Y S L L K I . . . . . K P . . A V K .  
tr|A0A0J5FN38|A0A0J5FN38\_9GAMM . . . . . S Y A . . . . . . . . . . N K K N K F W S F G K K . . . . . S K E V D V S I Y S L L K I . . . . . K P . . T V K M .  
tr|A0A432XLD4|A0A432XLD4\_9GAMM . . . . . A Y S . . . . . G . . . . . . . . . . K K . . . . . P G K S V D E S V Y S L L G I . . . . . S P . . S S K .  
tr|A0A2D8HU84|A0A2D8HU84\_9GAMM . . . . . Q Y G . . . . . K . . . . . . . . . . G V . . . . . K G K P V D T S V Y S L L D I . . . . . D P . . K Q S .  
tr|A0A656X1Q2|A0A656X1Q2\_9GAMM . . . . . Q Y G . . . . . K . . . . . . . . . . G V . . . . . K G K P V D T S V Y S L L D I . . . . . D P . . K Q S .  
tr|A0A4Q1QH79|A0A4Q1QH79\_9GAMM . . . . . K Y G . . . . . . . . . . K G V . . . . . K G K P V D T S V Y S L L S V . . . . . D P . . N E S K .  
tr|A0A1G7LQE6|A0A1G7LQE6\_9GAMM . . . . . K Y G . . . . . . . . . . K G V . . . . . K G K P V D T S V Y S L L G V . . . . . D P . . N E S K .  
tr|A0A432YVG7|A0A432YVG7\_9GAMM . . . . . K Y G . . . . . K . . . . . . . . . . G V . . . . . K G K P V D T S V Y S L L G V . . . . . D P . . N E S .  
tr|A0A1J5N0P5|A0A1J5N0P5\_9GAMM . . . . . R Y D . . . . . . . . . . K K . . . . . A R . . . . . G K K L V D E S V Y K V L G V . . . . . S P . . S K Q T .  
tr|A0A0D8D548|A0A0D8D548\_9GAMM . . . . . L Y G . . . . . . . . . . K K V . . . . . K K K Q V D E S I Y K V L N I . . . . . T P . . Q G R L .  
tr|A0A3E0TMM2|A0A3E0TMM2\_9GAMM . . . . . L Y G . . . . . K . . . . . A A . . . . . K K . . . . . G K K Q V D E T I Y G L L G I . . . . . T P . . S G S .  
tr|A0A3E0UD67|A0A3E0UD67\_9GAMM . . . . . L Y G . . . . . K . . . . . A A . . . . . K K . . . . . G K K Q V D E T I Y G L L G I . . . . . T P . . S G S .  
tr|A0A3E0U0P4|A0A3E0U0P4\_9GAMM . . . . . L Y G . . . . . K . . . . . A A . . . . . K K . . . . . G K K Q V D E T I Y G L L G I . . . . . T P . . S G S .  
tr|A0A0M2V8B1|A0A0M2V8B1\_9GAMM . . . . . L Y G . . . . . K . . . . . T A . . . . . K K . . . . . G A K T V D N S V Y N V L G V . . . . . T P . . A G K .  
tr|A0A285ITY5|A0A285ITY5\_9GAMM . . . . . L Y G . . . . . K . . . . . S A . . . . . K K . . . . . G A K T V D N S V Y S V L G V . . . . . T P . . G G K .  
tr|A0A486XTB9|A0A486XTB9\_9GAMM . . . . . L Y G . . . . . K . . . . . A V . . . . . K K . . . . . G K K Q V D S V Y S V L G V . . . . . T A . . A P R .  
tr|I1E1G1|I1E1G1\_9GAMM . . . . . R Y G . . . . . K . . . . . T A . . . . . K K . . . . . G K K Q V D S V Y S V L G V . . . . . T P . . A P R .  
tr|A0A1H6KJ68|A0A1H6KJ68\_9GAMM . . . . . L Y G . . . . . K . . . . . N G . . . . . K K . . . . . G K K R V D S V Y S V L G V . . . . . T P . . A A R .  
tr|A0A0X3Y764|A0A0X3Y764\_9GAMM . . . . . L Y G . . . . . K . . . . . N G . . . . . K K . . . . . G K K L V D E S V Y S V L G V . . . . . T P . . A P R .  
tr|A0A2N1YEV4|A0A2N1YEV4\_9GAMM . . . . . L Y G . . . . . K . . . . . N G . . . . . K K . . . . . G K K R V D E S V Y S V L G V . . . . . T P . . A P R .  
tr|A0A3P3QCM3|A0A3P3QCM3\_9GAMM . . . . . L Y G . . . . . A . . . . . K A . . . . . K . . . . . G K K Q V D A S V Y S V L G L . . . . . N P . . A A K .  
tr|F7NT72|F7NT72\_9GAMM . . . . . L Y G . . . . . A . . . . . K A . . . . . K . . . . . G K K Q V D A S V Y T I L G L . . . . . N P . . A A K .  
tr|A0A3S2TW63|A0A3S2TW63\_9GAMM . . . . . L Y G . . . . . A . . . . . K A . . . . . K . . . . . G K K Q V D A S V Y T V L G L . . . . . N P . . A A K .  
tr|A0A3D5BGW7|A0A3D5BGW7\_9GAMM . . . . . L Y G . . . . . A . . . . . K A . . . . . K K . . . . . G K K E V D T S V Y A L L G V . . . . . Q P . . G G K .  
tr|A0A5C7TI17|A0A5C7TI17\_9GAMM . . . . . L Y G . . . . . K . . . . . N A . . . . . K K . . . . . G R K D V D S S V Y S L L G V . . . . . Q P . . N G R .  
tr|A0A0U4W982|A0A0U4W982\_9GAMM . . . . . L Y G . . . . . K . . . . . N A . . . . . K K . . . . . G R K E V D T S V Y S L L G V . . . . . Q P . . N G R L .  
tr|A0A2I0FCM2|A0A2I0FCM2\_9GAMM . . . . . L Y G . . . . . K . . . . . K A . . . . . K K . . . . . G K K Q V D E S I Y K L L N L . . . . . K P . . Q A S .  
tr|A0A2G2IVL1|A0A2G2IVL1\_9GAMM . . . . . L Y G . . . . . K . . . . . K A . . . . . K K . . . . . G K K Q V D E S I Y K L L N L . . . . . K P . . E A S .  
tr|A6FI21|A6FI21\_9GAMM . . . . . L Y G . . . . . K . . . . . K A . . . . . K K . . . . . G K K Q V D E S I Y K L L N L . . . . . K P . . E A S .  
tr|A0A4U1BNR2|A0A4U1BNR2\_9GAMM . . . . . R F D . . . . . . . . . . S D . . . . . K K . . . . . G A K P V D E S V Y K V L G I . . . . . T P . . S P R .  
tr|E1SQ60|E1SQ60\_FERBD . . . . . Q Y G . . . . . . . . . . G K . . . . . A K . . . . . G K K P V D E S V Y Q V L G I . . . . . Q P . . Q G R L .  
tr|A0A4Y6IZ09|A0A4Y6IZ09\_9GAMM . . . . . Q Y G . . . . . . . . . . N K A . . . . . K K K L V D E S V Y G V L G L . . . . . T P . . A T D K .  
tr|A0A0C3QSZ7|A0A0C3QSZ7\_9GAMM . . . . . Q Y G . . . . . . . . . . G K S . . . . . K K K L V D E S V Y G V L G L . . . . . T P . . G N G G .  
tr|A0A6L7HXW0|A0A6L7HXW0\_9GAMM . . . . . Q Y G . . . . . . . . . . A K S . . . . . K K K L V D E S V Y G V L G L . . . . . T P . . G T D S .  
sp|A3QFP3|FADJ\_SHELP . . . . . Q Y G . . . . . A . . . . . . . . . . K S . . . . . K K K L V D E S V Y G V L G L . . . . . T P . . G A D .  
tr|A0A1E5IXH7|A0A1E5IXH7\_SHECO . . . . . Q Y G . . . . . . . . . . T K S . . . . . K K K L V D E S V Y A V L G I . . . . . T P . . T A T S .  
tr|A0A411PKQ0|A0A411PKQ0\_9GAMM . . . . . L Y G . . . . . . . . . . A K . . . . . A K . . . . . K G K Q V D E S V Y G V L G I . . . . . Q A . . S D K .  
tr|A0A6G9QKM3|A0A6G9QKM3\_9GAMM . . . . . Q Y G . . . . . . . . . . P K . . . . . A K . . . . . K A K L V D E S V Y G V L G I . . . . . A A . . S S D K .  
tr|A0A6P1UL63|A0A6P1UL63\_9GAMM . . . . . Q Y G . . . . . . . . . . P K . . . . . A K . . . . . K A K L V D E S V Y K V L D I . . . . . L I . . A S D K .  
tr|A0A2N1ERI9|A0A2N1ERI9\_9GAMM . . . . . Q Y G . . . . . . . . . . P K . . . . . A K . . . . . K A K L V D E S V Y K V L D I . . . . . L I . . A S D K .  
tr|A0A7W4FU55|A0A7W4FU55\_9GAMM . . . . . Q Y G . . . . . . . . . . P K . . . . . A K . . . . . K A K L V D E S V Y K V L D I . . . . . L I . . A S D K .  
sp|Q8ECP7|FADJ\_SHEON . . . . . Q Y G . . . . . . . . . . A A S . . . . . K K K A V D E T V Y G V L G I . . . . . K P . . G V D K .  
tr|A0A501XZY8|A0A501XZY8\_9GAMM . . . . . Q Y G . . . . . . . . . . A A S . . . . . K K K A V D E S V Y G V L G I . . . . . K P . . G V D K .  
tr|A0A2W5DCZ0|A0A2W5DCZ0\_SHEOE . . . . . Q Y G . . . . . . . . . . V A S . . . . . K K K A V D E S V Y G V L G I . . . . . K P . . G V D K .  
tr|A0A1E3V3C8|A0A1E3V3C8\_9GAMM . . . . . Q Y G . . . . . . . . . . V A S . . . . . K K K A V D E S V Y G V L G I . . . . . K P . . G V D K .  
tr|A0A1Z4AI20|A0A1Z4AI20\_9GAMM . . . . . Q Y G . . . . . . . . . . V A S . . . . . K K K A V D E S V Y G V L G I . . . . . K P . . G V D K .  
tr|A0A7X9LJL9|A0A7X9LJL9\_9GAMM . . . . . Q Y G . . . . . . . . . . V A S . . . . . K K K A V D E S V Y G V L G I . . . . . K P . . G V D K .  
tr|A0A073KMY5|A0A073KMY5\_9GAMM . . . . . Q Y G . . . . . . . . . . V A S . . . . . K K K A V D E S V Y G V L G I . . . . . K P . . G V D K .  
sp|A0KV76|FADJ\_SHESA . . . . . Q Y A . . . . . . . . . . A G N K A S S . . . . . K K K A V D E S V Y A V L G I . . . . . K P . . G M D K .  
tr|A0A220UTH7|A0A220UTH7\_9GAMM . . . . . Q Y A . . . . . . . . . . A G N K A S S . . . . . K K K A V D E S V Y A V L G I . . . . . K P . . G M D K .  
tr|A0A5B8R6W1|A0A5B8R6W1\_9GAMM . . . . . Q Y A . . . . . . . . . . A G N K A S S . . . . . K K K A V D E S V Y A V L G I . . . . . K P . . G M D K .  
tr|V1DAI4|V1DAI4\_9GAMM . . . . . Q Y A . . . . . . . . . . A G N K A S S . . . . . K K K A V D E S V Y A V L G I . . . . . K P . . G M D K .  
tr|A0A448CPQ4|A0A448CPQ4\_SHEPU . . . . . Q Y A . . . . . . . . . . A G N K A S S . . . . . K K K A V D E S V Y G V L G I . . . . . K P . . G I D K .  
tr|A0A252ERQ3|A0A252ERQ3\_SHEPU . . . . . Q Y A . . . . . . . . . . A G N K A S S . . . . . K K K A V D E S V Y G V L G I . . . . . K P . . G I D K .  
sp|Q0HKD1|FADJ\_SHESM . . . . . Q Y A . . . . . . . . . . A G N K A P S . . . . . K K K A V D E S V Y G V L G I . . . . . K P . . G I D K .  
sp|Q0HWN3|FADJ\_SHESR . . . . . Q Y A . . . . . . . . . . A G N K A S S . . . . . K K K V D E S V Y G V L G I . . . . . K P . . G I D K .  
tr|F7RQE3|F7RQE3\_9GAMM . . . . . Q Y G . . . . . . . . . . Q K D S . . . . . S K . . . . . K A K V D E S V Y G V L G I . . . . . K P . . G T N K .  
tr|B8EE98|B8EE98\_SHEB2 . . . . . Q Y G . . . . . . . . . . A S . . . . . S K . . . . . K A K A V D E S V Y G V L G I . . . . . K P . . G T N K .  
sp|A6WQ25|FADJ\_SHEB8 . . . . . Q Y G . . . . . . . . . . A S . . . . . S K . . . . . K A K A V D E S V Y G V L G I . . . . . K P . . G T N K .  
tr|A0A448EK41|A0A448EK41\_9GAMM . . . . . Q Y G . . . . . . . . . . A S . . . . . S K . . . . . K A K A V D E S V Y G V L G I . . . . . K P . . G T N K .  
tr|A0A553JHX1|A0A553JHX1\_SHEHA . . . . . L Y G . . . . . S . . . . . K A . . . . . K . . . . . K A K Q V D T S V Y G I L G L . . . . . S T . . P V N N .  
tr|B8CPY6|B8CPY6\_SHEFW . . . . . Q Y G . . . . . S . . . . . . . . . . K K . . . . . K A K E V D S S V Y A V L G L . . . . . T P . . G Q N .  
tr|A0A431WFC4|A0A431WFC4\_9GAMM . . . . . L Y G . . . . . S . . . . . K A . . . . . K Q K F K K . . . . . K A K L V D E S V Y A V L G L . . . . . T P . . S S T D .  
tr|A8FTR7|A8FTR7\_SHESH . . . . . L Y G . . . . . S . . . . . K A . . . . . K Q R F K K . . . . . K A K L V D E S V Y A V L G L . . . . . T P . . T S T D .  
tr|A0A431WNL0|A0A431WNL0\_9GAMM . . . . . L Y G . . . . . S . . . . . K A . . . . . K Q R F K K . . . . . K A K L V D E S V Y A V L G L . . . . . T P . . S S T D .  
tr|A0A550AEC5|A0A550AEC5\_9GAMM . . . . . L Y G . . . . . G . . . . . K A . . . . . N K . . . . . K A K Q V D E S V Y K V L G L . . . . . T P . . G T D .  
tr|A0A7L4WW90|A0A7L4WW90\_9GAMM . . . . . L Y G . . . . . G . . . . . K A . . . . . N K . . . . . K A K Q V D E S V Y K V L G L . . . . . T P . . G T D .  
tr|A9DDU3|A9DDU3\_9GAMM . . . . . L Y G . . . . . K . . . . . K S . . . . . N K . . . . . K A K R V D E S V Y K L L G L . . . . . T P . . G T S T P .  
tr|A0A330M2B9|A0A330M2B9\_9GAMM . . . . . L Y G K K S . . . . . N K . . . . . K K . . . . . K A K R V D E S V Y K L L G L . . . . . T P G T S T P .  
tr|A0A5N8UFC7|A0A5N8UFC7\_9GAMM . . . . . L Y G . . . . . G . . . . . K A . . . . . K K . . . . . K G K Q V D E S V Y Q V L G L . . . . . K P . . G V N A .  
tr|A0A1S6HN57|A0A1S6HN57\_9GAMM . . . . . L Y A . . . . . S . . . . . K A . . . . . K K . . . . . K G K Q V D E S V Y Q V L G L . . . . . K P . . G V N A .  
tr|D4ZMH7|D4ZMH7\_SHEVD . . . . . L Y A . . . . . G . . . . . K A . . . . . K K . . . . . K A K Q V D E S V Y Q V L G L . . . . . K P . . G V N A .  
tr|A0A3L8Q213|A0A3L8Q213\_9GAMM . . . . . L Y G . . . . . K . . . . . Q A . . . . . K K . . . . . G K K Q V D E S V Y A L F G I . . . . . T P . . S H D .  
tr|A0A3A6U4N9|A0A3A6U4N9\_9GAMM . . . . . L Y G . . . . . K . . . . . Q A . . . . . K K . . . . . G K K Q V D E S V Y A L F L G L . . . . . T P . . K P N .  
tr|A0A4Q5MA37|A0A4Q5MA37\_9GAMM . . . . . L Y G . . . . . K . . . . . A A . . . . . K K . . . . . G K K Q V D E S V Y K L F N L . . . . . N P . . T A N .  
tr|A0A1L6LSX5|A0A1L6LSX5\_9DELTA . . . . . L Y G . . . . . D . . . . . A K . . . . . K G . . . . . K G K R V D E S V Y G V L G L P T P D P K . . . . . A K P K .  
tr|A0A2W4L9B9|A0A2W4L9B9\_9PROT . . . . . R Y G . . . . . . . . . . G . . . . . K K . . . . . K R K E V D E S I Y D L L G . . . . . S R . . T R K R .  
tr|A0A2W4M4E6|A0A2W4M4E6\_9PROT . . . . . V Y G . . . . . . . . . . E K . . . . . R R K . . . . . G K K P V D T T V Y Q V L G I . . . . . Q P . . S R D A .  
tr|A0A6I2GRX9|A0A6I2GRX9\_9DELTA . . . . . L Y G . . . . . . . . . . G K G . . . . . K K . . . . . K K K E V D P S V Y A L L P H . . . . . G E . . K R V Q .  
tr|A0A0H4WMK2|A0A0H4WMK2\_9DELTA . . . . . L Y E . . . . . . . . . . D G . . . . . K K Q D V D P S I Y A L L P H . . . . . G T . . E R R S .  
tr|F8CJ36|F8CJ36\_MYXFH . . . . . L Y E . . . . . . . . . . G G . . . . . K K Q E V D P S I Y A L L P H . . . . . G T . . E R R S .  
tr|A0A250K0F1|A0A250K0F1\_9DELTA . . . . . L Y E . . . . . . . . . . G G . . . . . K K Q E V D P S I Y A L L P H . . . . . G T . . E R R S .  
tr|A0A7Y6WFZ2|A0A7Y6WFZ2\_9DELTA . . . . . L Y E . . . . . . . . . . D G . . . . . K K Q E V D S S I Y A L L P H . . . . . G T . . E R R S .  
tr|A0A7Y7C660|A0A7Y7C660\_9DELTA . . . . . L Y E . . . . . . . . . . D G . . . . . K K Q E V D S S I Y A L L P H . . . . . G T . . E R R S .  
tr|A0A7Y4JFH2|A0A7Y4JFH2\_MYXXA . . . . . L Y E . . . . . . . . . . D G . . . . . K K Q E V D S S I Y A L L P H . . . . . G T . . E R R S .  
tr|A0A4Y6CZQ9|A0A4Y6CZQ9\_MYXXA . . . . . L Y E . . . . . . . . . . D G . . . . . K K T E V D S S I Y A L L P H . . . . . G T . . E R R S .

tr|A0A7Y4IKV5|A0A7Y4IKV5\_MYXXA . . . . . LYE . . . . . DG . . . . . KKQEV DSS IYALLPH . . . . . GT. ERRS .  
tr|A0A511HHB0|A0A511HHB0\_9DELT . . . . . LYE . . . . . DG . . . . . KKQEV DSS IYALLPH . . . . . GT. ERRS .  
tr|A0A4Y6CKY7|A0A4Y6CKY7\_MYXXA . . . . . LYE . . . . . DG . . . . . KKQEV DSS IYALLPH . . . . . GT. ERRS .  
tr|Q1D1F2|Q1D1F2\_MYXXD . . . . . LYE . . . . . DG . . . . . KKQEV DSS IYALLPH . . . . . GT. ERRS .  
tr|A0A7Y4MA14|A0A7Y4MA14\_MYXXA . . . . . LYE . . . . . DG . . . . . KKQEV DSS IYALLPH . . . . . GT. ERRS .  
tr|A0A7T8Y4N9|A0A7T8Y4N9\_MYXXA . . . . . LYE . . . . . DG . . . . . KKQEV DSS IYALLPH . . . . . GT. ERRS .  
tr|L7UE67|L7UE67\_MYXSD . . . . . LYE . . . . . NG . . . . . KKREVDPS VYVLLPH . . . . . GK. ERKR .  
tr|A0A511T9X1|A0A511T9X1\_MYXFU . . . . . LYE . . . . . NG . . . . . KKKEVDPT VYGLLPH . . . . . GK. ERKG .  
tr|A0A7Y7C9C4|A0A7Y7C9C4\_9DELT . . . . . VYE . . . . . NG . . . . . KKKEVDPT VYALLPH . . . . . GK. ERKS .  
tr|A0A540X7W8|A0A540X7W8\_9DELT . . . . . LYE . . . . . NG . . . . . KKKEVDPT VYALLPH . . . . . GK. ERKS .  
tr|A0A3A5FK19|A0A3A5FK19\_9DELT . . . . . LYE . . . . . NG . . . . . KKKEVDPT VYALLPH . . . . . GK. DRKP .  
tr|A0A3A8JQL9|A0A3A8JQL9\_9DELT . . . . . LYE . . . . . DG . . . . . KKKEVDPQ VYVLLPH . . . . . GK. DRKS .  
tr|A0A7Y4NFA4|A0A7Y4NFA4\_9DELT . . . . . LYE . . . . . NG . . . . . KKKEVDPQ VYVLLPH . . . . . GK. DRKS .  
tr|A0A3A8HDQ7|A0A3A8HDQ7\_9DELT . . . . . LYE . . . . . NG . . . . . KKQD VDPQ VYVLLPH . . . . . GK. DRKS .  
tr|A0A3A8GR90|A0A3A8GR90\_9DELT . . . . . LYE . . . . . NG . . . . . KKKEVDPQ VYVLLPH . . . . . GK. DRKS .  
tr|A0A3A8SBD7|A0A3A8SBD7\_9DELT . . . . . LYE . . . . . NG . . . . . KKKEVDPQ VYVLLPH . . . . . GK. DRKS .  
tr|A0A3A8T0I8|A0A3A8T0I8\_9DELT . . . . . LYE . . . . . NG . . . . . KKKEVDPQ VYVLLPH . . . . . GK. DRKS .  
tr|A0A7X5BU07|A0A7X5BU07\_9DELT . . . . . LYE . . . . . NG . . . . . KKKEVDPQ VYVLLPH . . . . . GK. DRKS .  
tr|A0A7Y1RVL2|A0A7Y1RVL2\_9DELT . . . . . LYE . . . . . NG . . . . . KKKEVDPQ VYVLLPH . . . . . GK. DRKS .  
tr|A0A3A8THN2|A0A3A8THN2\_9DELT . . . . . LYE . . . . . NG . . . . . KKKEVDPQ VYVLLPH . . . . . GK. DRKS .  
tr|A0A7Y1RX76|A0A7Y1RX76\_9DELT . . . . . LYE . . . . . NG . . . . . KKKEVDPQ VYVLLPH . . . . . GK. DRKS .  
tr|A0A3A8RA58|A0A3A8RA58\_9DELT . . . . . LYE . . . . . NG . . . . . KKKEVDPQ VYVLLPH . . . . . GK. DRKS .  
tr|A0A410RPB6|A0A410RPB6\_CORCK . . . . . LYE . . . . . NG . . . . . KKKEVDPQ VYVLLPH . . . . . GK. DRKS .  
tr|A0A7Y4J474|A0A7Y4J474\_CORCK . . . . . LYE . . . . . NG . . . . . KKKEVDPQ VYVLLPH . . . . . GK. DRKS .  
tr|A0A3A8I9Z6|A0A3A8I9Z6\_9DELT . . . . . LYE . . . . . NG . . . . . KKKEVDPQ VYVLLPH . . . . . GK. DRKS .  
tr|H8MKE9|H8MKE9\_CORCM . . . . . LYE . . . . . NG . . . . . KKKEVDPQ VYVLLPH . . . . . GK. DRKS .  
tr|A0A3A8H102|A0A3A8H102\_9DELT . . . . . LYE . . . . . NG . . . . . KKKEVDPQ VYVLLPH . . . . . GK. DRKS .  
tr|A0A554FW33|A0A554FW33\_9DELT . . . . . LYE . . . . . NG . . . . . KKKEVDPQ VYVLLPH . . . . . GK. DRKS .  
tr|A0A3A8NPC0|A0A3A8NPC0\_9DELT . . . . . LYE . . . . . NG . . . . . KKQD VDPQ VYVLLPH . . . . . GK. DRKA .  
tr|A0A3A8JUV3|A0A3A8JUV3\_9DELT . . . . . LYE . . . . . NG . . . . . KKQD VDPQ VYVLLPH . . . . . GK. DRKT .  
tr|A0A3A8NEX6|A0A3A8NEX6\_9DELT . . . . . LYE . . . . . NG . . . . . KKQD VDPQ VYVLLPH . . . . . GK. DRKT .  
tr|A0A3A8JEU8|A0A3A8JEU8\_9DELT . . . . . LYE . . . . . DG . . . . . KKKEVDPQ VYVLLPH . . . . . GK. DRKS .  
tr|A0A3A8LI76|A0A3A8LI76\_9DELT . . . . . LYE . . . . . DG . . . . . KKKEVDPQ VYVLLPH . . . . . GK. DRKS .  
tr|A0A085WXN8|A0A085WXN8\_9DELT . . . . . TYT . . . . . G . . . . . KKKEVDAS VYGLLPG . . . . . GA. DRKK .  
tr|A0A2T4VOM5|A0A2T4VOM5\_9DELT . . . . . TYD . . . . . GK . . . . . KKKEVDAS VYELLPH . . . . . GK. NRKN .  
tr|A0A0G2ZSW5|A0A0G2ZSW5\_9DELT . . . . . TYD . . . . . G . . . . . KKKEVDPT VYELLPH . . . . . GK. NRKS .  
tr|A0A3M2DKY0|A0A3M2DKY0\_9DELT . . . . . RYD . . . . . V . . . . . PKKK . . . . . GKRFPVDDS VYAVLGV . . . . . EP. RTR .  
tr|A0A661NQ58|A0A661NQ58\_9DELT . . . . . LYG . . . . . DD . . . . . KK . . . . . GERVVDES VYTLGV . . . . . KP. NNKV .  
tr|A0A520YD99|A0A520YD99\_9DELT . . . . . LYG . . . . . D . . . . . KKKGVDAS VYVVLGV . . . . . TP. NNKS .  
tr|A0A7Y3BRE4|A0A7Y3BRE4\_9DELT . . . . . LYG . . . . . D . . . . . KKKGVDAS VYVVLGV . . . . . TP. NNKS .  
tr|A0A2D9TF90|A0A2D9TF90\_9DELT . . . . . AYE . . . . . GG . . . . . KSKGVDTS VYVVLGV . . . . . TP. TNET .  
tr|A0A2E0TP32|A0A2E0TP32\_9DELT . . . . . LYG . . . . . D . . . . . KKKGVDAS VYVVLGV . . . . . KP. KPGA .  
tr|A0A2E4Y3V1|A0A2E4Y3V1\_9PROT . . . . . LYN . . . . . . . . . . EKKSSNPLSKIFQ . . . . . GSGKEINPAALKIVRENRIELR.GPOS .  
tr|A0A2E6VRH4|A0A2E6VRH4\_9DELT . . . . . LYG . . . . . AQ . . . . . QNKGMPLKIKSTLGGKPPGVKNRPINPEAMKVVNQYRIEKG. . . . . HNH .  
tr|A0A1F9FB59|A0A1F9FB59\_9DELT . . . . . MYE . . . . . KH . . . . . KQSPVEKARAIVEKAMGAGK . . . . . KDKPYNPAGALAILERHGV . . . . . KPGSKKD .

ECHA\_HUMAN

0000000000000000000000

000000000000

0000000

|                     |                   |            |            |            |            |            |
|---------------------|-------------------|------------|------------|------------|------------|------------|
|                     | 670               | 680        | 690        | 700        | 710        | 720        |
| ECHA_HUMAN          | S . . . .         | SDEDIQFR   | LTVRFVNE   | EAVMCLQ    | EGILATPAB  | GDIGAVFG   |
| tr   A0A4R6XLA8     | A0A4R6XLA8_9GAMM  | A0A4R6XLA8 | A0A4R6XLA8 | A0A4R6XLA8 | A0A4R6XLA8 | A0A4R6XLA8 |
| tr   A0A6A01JT2     | A0A6A01JT2_9BACT  | A0A6A01JT2 | A0A6A01JT2 | A0A6A01JT2 | A0A6A01JT2 | A0A6A01JT2 |
| tr   A0A7V3QZU7     | A0A7V3QZU7_9BACT  | A0A7V3QZU7 | A0A7V3QZU7 | A0A7V3QZU7 | A0A7V3QZU7 | A0A7V3QZU7 |
| tr   A0A7V4SYJ6     | A0A7V4SYJ6_9BACT  | A0A7V4SYJ6 | A0A7V4SYJ6 | A0A7V4SYJ6 | A0A7V4SYJ6 | A0A7V4SYJ6 |
| tr   A0A2A8D2N6     | A0A2A8D2N6_9BACT  | A0A2A8D2N6 | A0A2A8D2N6 | A0A2A8D2N6 | A0A2A8D2N6 | A0A2A8D2N6 |
| tr   A0A2N1TGP0     | A0A2N1TGP0_9SPIR  | A0A2N1TGP0 | A0A2N1TGP0 | A0A2N1TGP0 | A0A2N1TGP0 | A0A2N1TGP0 |
| tr   A0A1G3QGW4     | A0A1G3QGW4_9SPIR  | A0A1G3QGW4 | A0A1G3QGW4 | A0A1G3QGW4 | A0A1G3QGW4 | A0A1G3QGW4 |
| tr   A0A1G3QTY3     | A0A1G3QTY3_9SPIR  | A0A1G3QTY3 | A0A1G3QTY3 | A0A1G3QTY3 | A0A1G3QTY3 | A0A1G3QTY3 |
| tr   A0A7X9L359     | A0A7X9L359_9DELTA | A0A7X9L359 | A0A7X9L359 | A0A7X9L359 | A0A7X9L359 | A0A7X9L359 |
| tr   A0A522CJY0     | A0A522CJY0_9SPIR  | A0A522CJY0 | A0A522CJY0 | A0A522CJY0 | A0A522CJY0 | A0A522CJY0 |
| tr   A0A2N1RRJ3     | A0A2N1RRJ3_9SPIR  | A0A2N1RRJ3 | A0A2N1RRJ3 | A0A2N1RRJ3 | A0A2N1RRJ3 | A0A2N1RRJ3 |
| tr   A0A2N2KFN7     | A0A2N2KFN7_9DELTA | A0A2N2KFN7 | A0A2N2KFN7 | A0A2N2KFN7 | A0A2N2KFN7 | A0A2N2KFN7 |
| tr   A0A1V6AXX9     | A0A1V6AXX9_9DELTA | A0A1V6AXX9 | A0A1V6AXX9 | A0A1V6AXX9 | A0A1V6AXX9 | A0A1V6AXX9 |
| tr   A0A2N2HZL0     | A0A2N2HZL0_9DELTA | A0A2N2HZL0 | A0A2N2HZL0 | A0A2N2HZL0 | A0A2N2HZL0 | A0A2N2HZL0 |
| tr   A0A5E8ARP3     | A0A5E8ARP3_9BACT  | A0A5E8ARP3 | A0A5E8ARP3 | A0A5E8ARP3 | A0A5E8ARP3 | A0A5E8ARP3 |
| tr   A0A662A7B1     | A0A662A7B1_9BACT  | A0A662A7B1 | A0A662A7B1 | A0A662A7B1 | A0A662A7B1 | A0A662A7B1 |
| tr   D7CV16 D7CV16  | TRURR             | D7CV16     | D7CV16     | D7CV16     | D7CV16     | D7CV16     |
| tr   A0A3C2AKK4     | A0A3C2AKK4_9FLAO  | A0A3C2AKK4 | A0A3C2AKK4 | A0A3C2AKK4 | A0A3C2AKK4 | A0A3C2AKK4 |
| tr   A0A3B8ZLN3     | A0A3B8ZLN3_9PLAN  | A0A3B8ZLN3 | A0A3B8ZLN3 | A0A3B8ZLN3 | A0A3B8ZLN3 | A0A3B8ZLN3 |
| tr   A0A345UGV8     | A0A345UGV8_9BACT  | A0A345UGV8 | A0A345UGV8 | A0A345UGV8 | A0A345UGV8 | A0A345UGV8 |
| tr   A0A6C1P6A2     | A0A6C1P6A2_9BACT  | A0A6C1P6A2 | A0A6C1P6A2 | A0A6C1P6A2 | A0A6C1P6A2 | A0A6C1P6A2 |
| tr   A0A3M1X9W8     | A0A3M1X9W8_9BACT  | A0A3M1X9W8 | A0A3M1X9W8 | A0A3M1X9W8 | A0A3M1X9W8 | A0A3M1X9W8 |
| tr   A0A354C796     | A0A354C796_9DELTA | A0A354C796 | A0A354C796 | A0A354C796 | A0A354C796 | A0A354C796 |
| tr   A0A3M1NUM8     | A0A3M1NUM8_9BACT  | A0A3M1NUM8 | A0A3M1NUM8 | A0A3M1NUM8 | A0A3M1NUM8 | A0A3M1NUM8 |
| tr   A0A3M2KRC8     | A0A3M2KRC8_9BACT  | A0A3M2KRC8 | A0A3M2KRC8 | A0A3M2KRC8 | A0A3M2KRC8 | A0A3M2KRC8 |
| tr   A0A5S9IHR0     | A0A5S9IHR0_9BACT  | A0A5S9IHR0 | A0A5S9IHR0 | A0A5S9IHR0 | A0A5S9IHR0 | A0A5S9IHR0 |
| tr   A0A6M1ST81     | A0A6M1ST81_9BACT  | A0A6M1ST81 | A0A6M1ST81 | A0A6M1ST81 | A0A6M1ST81 | A0A6M1ST81 |
| tr   A0A521AAE5     | A0A521AAE5_9BACT  | A0A521AAE5 | A0A521AAE5 | A0A521AAE5 | A0A521AAE5 | A0A521AAE5 |
| tr   A0A1M4ZMD6     | A0A1M4ZMD6_9BACT  | A0A1M4ZMD6 | A0A1M4ZMD6 | A0A1M4ZMD6 | A0A1M4ZMD6 | A0A1M4ZMD6 |
| tr   A0A2A2GCS2     | A0A2A2GCS2_9BACT  | A0A2A2GCS2 | A0A2A2GCS2 | A0A2A2GCS2 | A0A2A2GCS2 | A0A2A2GCS2 |
| tr   A0A5D3YIH7     | A0A5D3YIH7_9BACT  | A0A5D3YIH7 | A0A5D3YIH7 | A0A5D3YIH7 | A0A5D3YIH7 | A0A5D3YIH7 |
| tr   A0A6M1T9G0     | A0A6M1T9G0_9BACT  | A0A6M1T9G0 | A0A6M1T9G0 | A0A6M1T9G0 | A0A6M1T9G0 | A0A6M1T9G0 |
| tr   A0A6A8Q1Y8     | A0A6A8Q1Y8_9BACT  | A0A6A8Q1Y8 | A0A6A8Q1Y8 | A0A6A8Q1Y8 | A0A6A8Q1Y8 | A0A6A8Q1Y8 |
| tr   A0A521BVJ3     | A0A521BVJ3_9BACT  | A0A521BVJ3 | A0A521BVJ3 | A0A521BVJ3 | A0A521BVJ3 | A0A521BVJ3 |
| tr   A0A359E0Y8     | A0A359E0Y8_9BACT  | A0A359E0Y8 | A0A359E0Y8 | A0A359E0Y8 | A0A359E0Y8 | A0A359E0Y8 |
| tr   A0A2D8CIM6     | A0A2D8CIM6_9BACT  | A0A2D8CIM6 | A0A2D8CIM6 | A0A2D8CIM6 | A0A2D8CIM6 | A0A2D8CIM6 |
| tr   A0A2D9FWF5     | A0A2D9FWF5_9BACT  | A0A2D9FWF5 | A0A2D9FWF5 | A0A2D9FWF5 | A0A2D9FWF5 | A0A2D9FWF5 |
| tr   A0A1B6YB70     | A0A1B6YB70_9BACT  | A0A1B6YB70 | A0A1B6YB70 | A0A1B6YB70 | A0A1B6YB70 | A0A1B6YB70 |
| tr   A0A2D4ZTC0     | A0A2D4ZTC0_9BACT  | A0A2D4ZTC0 | A0A2D4ZTC0 | A0A2D4ZTC0 | A0A2D4ZTC0 | A0A2D4ZTC0 |
| tr   A0A3D4UVW7     | A0A3D4UVW7_9BACT  | A0A3D4UVW7 | A0A3D4UVW7 | A0A3D4UVW7 | A0A3D4UVW7 | A0A3D4UVW7 |
| tr   A0A3F3I3M2     | A0A3F3I3M2_9BACT  | A0A3F3I3M2 | A0A3F3I3M2 | A0A3F3I3M2 | A0A3F3I3M2 | A0A3F3I3M2 |
| tr   A0A3D1G7L9     | A0A3D1G7L9_9BACT  | A0A3D1G7L9 | A0A3D1G7L9 | A0A3D1G7L9 | A0A3D1G7L9 | A0A3D1G7L9 |
| tr   A0A3M8G1Y8     | A0A3M8G1Y8_9BACT  | A0A3M8G1Y8 | A0A3M8G1Y8 | A0A3M8G1Y8 | A0A3M8G1Y8 | A0A3M8G1Y8 |
| tr   A0A5Q4F391     | A0A5Q4F391_9BACT  | A0A5Q4F391 | A0A5Q4F391 | A0A5Q4F391 | A0A5Q4F391 | A0A5Q4F391 |
| tr   A0A6I7NPV0     | A0A6I7NPV0_9BACT  | A0A6I7NPV0 | A0A6I7NPV0 | A0A6I7NPV0 | A0A6I7NPV0 | A0A6I7NPV0 |
| tr   A0A651G1J2     | A0A651G1J2_9BACT  | A0A651G1J2 | A0A651G1J2 | A0A651G1J2 | A0A651G1J2 | A0A651G1J2 |
| tr   A0A371QRK5     | A0A371QRK5_9BACT  | A0A371QRK5 | A0A371QRK5 | A0A371QRK5 | A0A371QRK5 | A0A371QRK5 |
| tr   A0A2N0VGJ5     | A0A2N0VGJ5_9BACT  | A0A2N0VGJ5 | A0A2N0VGJ5 | A0A2N0VGJ5 | A0A2N0VGJ5 | A0A2N0VGJ5 |
| tr   A0A316TYJ0     | A0A316TYJ0_9BACT  | A0A316TYJ0 | A0A316TYJ0 | A0A316TYJ0 | A0A316TYJ0 | A0A316TYJ0 |
| tr   A0A651GLZ8     | A0A651GLZ8_9BACT  | A0A651GLZ8 | A0A651GLZ8 | A0A651GLZ8 | A0A651GLZ8 | A0A651GLZ8 |
| tr   A0A7Y5V3S5     | A0A7Y5V3S5_9BACT  | A0A7Y5V3S5 | A0A7Y5V3S5 | A0A7Y5V3S5 | A0A7Y5V3S5 | A0A7Y5V3S5 |
| tr   A0A7W1SHC0     | A0A7W1SHC0_9BACT  | A0A7W1SHC0 | A0A7W1SHC0 | A0A7W1SHC0 | A0A7W1SHC0 | A0A7W1SHC0 |
| tr   A0A7Y5PBT7     | A0A7Y5PBT7_9BACT  | A0A7Y5PBT7 | A0A7Y5PBT7 | A0A7Y5PBT7 | A0A7Y5PBT7 | A0A7Y5PBT7 |
| tr   A0A7Y5TXL8     | A0A7Y5TXL8_9BACT  | A0A7Y5TXL8 | A0A7Y5TXL8 | A0A7Y5TXL8 | A0A7Y5TXL8 | A0A7Y5TXL8 |
| tr   A0A423PQ96     | A0A423PQ96_9GAMM  | A0A423PQ96 | A0A423PQ96 | A0A423PQ96 | A0A423PQ96 | A0A423PQ96 |
| tr   U2G066 U2G066  | 9GAMM             | U2G066     | U2G066     | U2G066     | U2G066     | U2G066     |
| tr   A0A2E0J1F4     | A0A2E0J1F4_9GAMM  | A0A2E0J1F4 | A0A2E0J1F4 | A0A2E0J1F4 | A0A2E0J1F4 | A0A2E0J1F4 |
| tr   A0A2D4SCM8     | A0A2D4SCM8_9GAMM  | A0A2D4SCM8 | A0A2D4SCM8 | A0A2D4SCM8 | A0A2D4SCM8 | A0A2D4SCM8 |
| tr   L0WJH1 L0WJH1  | 9GAMM             | L0WJH1     | L0WJH1     | L0WJH1     | L0WJH1     | L0WJH1     |
| tr   A0A1H5XF61     | A0A1H5XF61_9GAMM  | A0A1H5XF61 | A0A1H5XF61 | A0A1H5XF61 | A0A1H5XF61 | A0A1H5XF61 |
| tr   A0A2E9TS48     | A0A2E9TS48_9GAMM  | A0A2E9TS48 | A0A2E9TS48 | A0A2E9TS48 | A0A2E9TS48 | A0A2E9TS48 |
| tr   A0A095UE19     | A0A095UE19_9GAMM  | A0A095UE19 | A0A095UE19 | A0A095UE19 | A0A095UE19 | A0A095UE19 |
| tr   A0A7G2S9A0     | A0A7G2S9A0_9GAMM  | A0A7G2S9A0 | A0A7G2S9A0 | A0A7G2S9A0 | A0A7G2S9A0 | A0A7G2S9A0 |
| tr   B5JU27 B5JU27  | 9GAMM             | B5JU27     | B5JU27     | B5JU27     | B5JU27     | B5JU27     |
| tr   A0A1Y0IHP1     | A0A1Y0IHP1_9GAMM  | A0A1Y0IHP1 | A0A1Y0IHP1 | A0A1Y0IHP1 | A0A1Y0IHP1 | A0A1Y0IHP1 |
| tr   A0A316FZ14     | A0A316FZ14_9GAMM  | A0A316FZ14 | A0A316FZ14 | A0A316FZ14 | A0A316FZ14 | A0A316FZ14 |
| tr   A0A498C231     | A0A498C231_9GAMM  | A0A498C231 | A0A498C231 | A0A498C231 | A0A498C231 | A0A498C231 |
| tr   Q0A6T4 Q0A6T4  | ALKEH             | Q0A6T4     | Q0A6T4     | Q0A6T4     | Q0A6T4     | Q0A6T4     |
| tr   A0A3E0WL10     | A0A3E0WL10_9GAMM  | A0A3E0WL10 | A0A3E0WL10 | A0A3E0WL10 | A0A3E0WL10 | A0A3E0WL10 |
| tr   A0A3S1BU16     | A0A3S1BU16_9GAMM  | A0A3S1BU16 | A0A3S1BU16 | A0A3S1BU16 | A0A3S1BU16 | A0A3S1BU16 |
| tr   A0A7V8QFN9     | A0A7V8QFN9_9GAMM  | A0A7V8QFN9 | A0A7V8QFN9 | A0A7V8QFN9 | A0A7V8QFN9 | A0A7V8QFN9 |
| tr   A0A1H8PFF9     | A0A1H8PFF9_9GAMM  | A0A1H8PFF9 | A0A1H8PFF9 | A0A1H8PFF9 | A0A1H8PFF9 | A0A1H8PFF9 |
| tr   A0A6H0J0V7     | A0A6H0J0V7_9GAMM  | A0A6H0J0V7 | A0A6H0J0V7 | A0A6H0J0V7 | A0A6H0J0V7 | A0A6H0J0V7 |
| tr   V5EZX6 V5EZX6  | 9VIBR             | V5EZX6     | V5EZX6     | V5EZX6     | V5EZX6     | V5EZX6     |
| tr   A0A611QBM2     | A0A611QBM2_9VIBR  | A0A611QBM2 | A0A611QBM2 | A0A611QBM2 | A0A611QBM2 | A0A611QBM2 |
| tr   A0A511QRL5     | A0A511QRL5_9VIBR  | A0A511QRL5 | A0A511QRL5 | A0A511QRL5 | A0A511QRL5 | A0A511QRL5 |
| tr   A0A7Y0JZP4     | A0A7Y0JZP4_9VIBR  | A0A7Y0JZP4 | A0A7Y0JZP4 | A0A7Y0JZP4 | A0A7Y0JZP4 | A0A7Y0JZP4 |
| tr   A0A193KD24     | A0A193KD24_9VIBR  | A0A193KD24 | A0A193KD24 | A0A193KD24 | A0A193KD24 | A0A193KD24 |
| tr   A0A1S1HM72     | A0A1S1HM72_PROST  | A0A1S1HM72 | A0A1S1HM72 | A0A1S1HM72 | A0A1S1HM72 | A0A1S1HM72 |
| tr   A0A7T8I613     | A0A7T8I613_9GAMM  | A0A7T8I613 | A0A7T8I613 | A0A7T8I613 | A0A7T8I613 | A0A7T8I613 |
| tr   A0A140N1F0     | A0A140N1F0_PROSM  | A0A140N1F0 | A0A140N1F0 | A0A140N1F0 | A0A140N1F0 | A0A140N1F0 |
| tr   A0A379GMB7     | A0A379GMB7_PROST  | A0A379GMB7 | A0A379GMB7 | A0A379GMB7 | A0A379GMB7 | A0A379GMB7 |
| tr   A0A379H393     | A0A379H393_PROST  | A0A379H393 | A0A379H393 | A0A379H393 | A0A379H393 | A0A379H393 |
| tr   B2Q0L5 B2Q0L5  | PROST             | B2Q0L5     | B2Q0L5     | B2Q0L5     | B2Q0L5     | B2Q0L5     |
| tr   A0A6I3JUE9     | A0A6I3JUE9_9GAMM  | A0A6I3JUE9 | A0A6I3JUE9 | A0A6I3JUE9 | A0A6I3JUE9 | A0A6I3JUE9 |
| tr   A0A7D4P594     | A0A7D4P594_YERMW  | A0A7D4P594 | A0A7D4P594 | A0A7D4P594 | A0A7D4P594 | A0A7D4P594 |
| tr   A0A7U7IVK6     | A0A7U7IVK6_YEREN  | A0A7U7IVK6 | A0A7U7IVK6 | A0A7U7IVK6 | A0A7U7IVK6 | A0A7U7IVK6 |
| tr   A0A447RIF5     | A0A447RIF5_YEREN  | A0A447RIF5 | A0A447RIF5 | A0A447RIF5 | A0A447RIF5 | A0A447RIF5 |
| tr   A0A7H4ZLV9     | A0A7H4ZLV9_YERP4  | A0A7H4ZLV9 | A0A7H4ZLV9 | A0A7H4ZLV9 | A0A7H4ZLV9 | A0A7H4ZLV9 |
| tr   A0A0H3NX46     | A0A0H3NX46_YEREL  | A0A0H3NX46 | A0A0H3NX46 | A0A0H3NX46 | A0A0H3NX46 | A0A0H3NX46 |
| tr   A0A7T9XUV7     | A0A7T9XUV7_YEREN  | A0A7T9XUV7 | A0A7T9XUV7 | A0A7T9XUV7 | A0A7T9XUV7 | A0A7T9XUV7 |
| tr   A0A7U7IYV8     | A0A7U7IYV8_YEREN  | A0A7U7IYV8 | A0A7U7IYV8 | A0A7U7IYV8 | A0A7U7IYV8 | A0A7U7IYV8 |
| tr   A0A0H5G7G2     | A0A0H5G7G2_YEREN  | A0A0H5G7G2 | A0A0H5G7G2 | A0A0H5G7G2 | A0A0H5G7G2 | A0A0H5G7G2 |
| tr   A0A2A7TDI2     | A0A2A7TDI2_YERKR  | A0A2A7TDI2 | A0A2A7TDI2 | A0A2A7TDI2 | A0A2A7TDI2 | A0A2A7TDI2 |
| tr   A0A0T9M261     | A0A0T9M261_YERKR  | A0A0T9M261 | A0A0T9M261 | A0A0T9M261 | A0A0T9M261 | A0A0T9M261 |
| tr   A0A0A0CMP1     | A0A0A0CMP1_PHOLU  | A0A0A0CMP1 | A0A0A0CMP1 | A0A0A0CMP1 | A0A0A0CMP1 | A0A0A0CMP1 |
| tr   A0A329VG55     | A0A329VG55_9GAMM  | A0A329VG55 | A0A329VG55 | A0A329VG55 | A0A329VG55 | A0A329VG55 |
| tr   sp Q7N288 FADJ | PHOLL             | Q7N288     | Q7N288     | Q7N288     | Q7N288     | Q7N288     |
| tr   A0A6L9JMX5     | A0A6L9JMX5_PHOLM  | A0A6L9JMX5 | A0A6L9JMX5 | A0A6L9JMX5 | A0A6L9JMX5 | A0A6L9JMX5 |
| tr   A0A7X5HQ29     | A0A7X5HQ29_PHOLM  | A0A7X5HQ29 | A0A7X5HQ29 | A0A7X5HQ29 | A0A7X5HQ29 | A0A7X5HQ29 |
| tr   A0A1C0U051     | A0A1C0U051_9GAMM  | A0A1C0U051 | A0A1C0U051 | A0A1C0U051 | A0A1C0U051 | A0A1C0U051 |
| tr   A0A7X5QF62     | A0A7X5QF62_9GAMM  | A0A7X5QF62 | A0A7X5QF62 | A0A7X5QF62 | A          |            |



|                                 |                                                                 |
|---------------------------------|-----------------------------------------------------------------|
| tr A0A2D0KWM9 A0A2D0KWM9_9GAMM  | M....SRPEIAQRCLMLMLNEAVRCLDEGVIRSPRDGDIGAVFGIGFPFLFGGPFPRYMDK   |
| tr A0A2D0LAI1 A0A2D0LAI1_9GAMM  | M....SRPDIARQRCVLMMLNEAVRCLDEAIIRSPRDGDIGAVFGIGFPFLFGGPFPRYMDK  |
| tr A0A2D0IXC8 A0A2D0IXC8_XENBU  | I....SPSDVAQRCLMPMLNEAVRCLDEGIIRSPRDGDIGAVFGIGFPFLFGGPFPRYMDK   |
| tr W1JAM5 W1JAM5_9GAMM          | M....SPSDIAQRCLMPMLNEAVRCLDEGIIRSPRDGDIGAVFGIGFPFLFGGPFPRYMDK   |
| tr A0A3D9UED3 A0A3D9UED3_9GAMM  | I....SPSDIAQRCLMPMLNEAVRCLDEGIIRSPRDGDIGAVFGIGFPFLFGGPFPRYMDK   |
| tr A0A1I3JCA9 A0A1I3JCA9_9GAMM  | V....LPAEIAQRCLVLMMLNEAVRCLDEGIIRSPRDGDIGAVFGIGFPFLFGGPFPRYMDK  |
| tr A0A068QUL9 A0A068QUL9_9GAMM  | M....LPADIAQRCLVLMMLNEAVRCLDEGIIRSPRDGDIGAVFGIGFPFLFGGPFPRYMDK  |
| tr A0A0M0TCH6 A0A0M0TCH6_9GAMM  | M....LPADIAQRCLVLMMLNEAVRCLDEGIIRSPRDGDIGAVFGIGFPFLFGGPFPRYMDK  |
| tr A0A1Q5U854 A0A1Q5U854_9GAMM  | M....LPADIAQRCLVLMMLNEAVRCLDEGIIRSPRDGDIGAVFGIGFPFLFGGPFPRYMDK  |
| tr A0A2D0ISP1 A0A2D0ISP1_9GAMM  | M....LPADIAQRCLVLMMLNEAVRCLDEGIIRSPRDGDIGAVFGIGFPFLFGGPFPRYMDK  |
| tr A0A1Q5TUI8 A0A1Q5TUI8_9GAMM  | M....LPADIAQRCLVLMMLNEAVRCLDEGIIRSPRDGDIGAVFGIGFPFLFGGPFPRYMDK  |
| tr A0A2D0KJI7 A0A2D0KJI7_9GAMM  | M....LPADIAQRCLVLMMLNEAVRCLDEGIIRSPRDGDIGAVFGIGFPFLFGGPFPRYMDK  |
| tr A0A1Y2SB97 A0A1Y2SB97_9GAMM  | M....LPADIAQRCLVLMMLNEAVRCLDEGIIRSPRDGDIGAVFGIGFPFLFGGPFPRYMDK  |
| tr A0A1I5DWI7 A0A1I5DWI7_9GAMM  | M....LPADIAQRCLVLMMLNEAVRCLDEGIIRSPRDGDIGAVFGIGFPFLFGGPFPRYMDK  |
| tr A0A1I7GWY6 A0A1I7GWY6_9GAMM  | M....SPVDIAQRCLVLMMLNEAVRCLDEGIIRSPRDGDIGAVFGIGFPFLFGGPFPRYMDK  |
| tr D3VKY8 D3VKY8_XENNA          | M....SPADIAQRCLVLMMLNEAVRCLDENIIRSPRDGDIGAVFGIGFPFLFGGPFPRYMDK  |
| tr A0A2G0Q6Q9 A0A2G0Q6Q9_9GAMM  | M....LPVDIAQRCLVLMMLNEAVRCLDEGVIRSPRDGDIGAVFGIGFPFLFGGPFPRYMDK  |
| tr A0A2D0JU24 A0A2D0JU24_9GAMM  | M....LPADIAQRCLVLMMLNEAVRCLDEGIIRSPRDGDIGAVFGIGFPFLFGGPFPRYMDK  |
| tr A0A0J5FN38 A0A0J5FN38_9GAMM  | L....PADIAQRCLVLMMLNEAVRCLDEGIIRSPRDGDIGAVFGIGFPFLFGGPFPRYMDK   |
| tr A0A432XLD4 A0A432XLD4_9GAMM  | L....SGEEIAQRCLVLMMLNEAVRCLDEGIIRSPRDGDIGAVFGIGFPFLFGGPFPRYMDK  |
| tr A0A2D8HU84 A0A2D8HU84_9GAMM  | K....SADEIIDICLLPMLNEAVRCLDEGIIRSPRDGDIGAVFGIGFPFLFGGPFPRYMDK   |
| tr A0A656X1Q2 A0A656X1Q2_9GAMM  | K....SADEIIDICLLPMLNEAVRCLDEGIIRSPRDGDIGAVFGIGFPFLFGGPFPRYMDK   |
| tr A0A4Q1QH79 A0A4Q1QH79_9GAMM  | K....SAEDIVDICLLPMLNEAVRCLDEGIIRSPRDGDIGAVFGIGFPFLFGGPFPRYMDK   |
| tr A0A1G7LQE6 A0A1G7LQE6_9GAMM  | K....SAEDIVDICLLPMLNEAVRCLDEGIIRSPRDGDIGAVFGIGFPFLFGGPFPRYMDK   |
| tr A0A432YV7 A0A432YV7_9GAMM    | K....SAEDIVDICLLPMLNEAVRCLDEGIIRSPRDGDIGAVFGIGFPFLFGGPFPRYMDK   |
| tr A0A1J5N0P5 A0A1J5N0P5_9GAMM  | .....SHQEIAQRCLVLMMLNEAVRCLDEGIIRSPRDGDIGAVFGIGFPFLFGGPFPRYMDK  |
| tr A0A0D8D548 A0A0D8D548_9GAMM  | .....SDDEISQRCLVLMMLNEAVRCLDEGIIRSPRDGDIGAVFGIGFPFLFGGPFPRYMDK  |
| tr A0A3E0TNN2 A0A3E0TNN2_9GAMM  | L....TEQEIARCLVLMMLNEAVRCLDEGVIRSPRDGDIGAVFGIGFPFLFGGPFPRYMDK   |
| tr A0A3E0UD67 A0A3E0UD67_9GAMM  | L....TEQEIARCLVLMMLNEAVRCLDEGVIRSPRDGDIGAVFGIGFPFLFGGPFPRYMDK   |
| tr A0A3E0U0P4 A0A3E0U0P4_9GAMM  | L....TEQEIARCLVLMMLNEAVRCLDEGVIRSPRDGDIGAVFGIGFPFLFGGPFPRYMDK   |
| tr A0A0M2V8B1 A0A0M2V8B1_9GAMM  | L....SSEAIARCLVLMMLNEAVRCLDEGVIRSPRDGDIGAVFGIGFPFLFGGPFPRYMDK   |
| tr A0A285ITY5 A0A285ITY5_9GAMM  | L....SSDAIANRCLVLMMLNEAVRCLDEGIIRSPRDGDIGAVFGIGFPFLFGGPFPRYMDK  |
| tr A0A486XTB9 A0A486XTB9_9GAMM  | L....IRDEISRRCLVLMMLNEAVRCLDEGIIRSPRDGDIGAVFGIGFPFLFGGPFPRYMDK  |
| tr I1E1G1 I1E1G1_9GAMM          | L....NSDEISRRCLVLMMLNEAVRCLDEGIIRSPRDGDIGAVFGIGFPFLFGGPFPRYMDK  |
| tr A0A1H6KJ68 A0A1H6KJ68_9GAMM  | L....NSDEISRRCLVLMMLNEAVRCLDEGIIRSPRDGDIGAVFGIGFPFLFGGPFPRYMDK  |
| tr A0A0X3Y764 A0A0X3Y764_9GAMM  | L....NSDEISRRCLVLMMLNEAVRCLDEGIIRSPRDGDIGAVFGIGFPFLFGGPFPRYMDK  |
| tr A0A2N1YEV4 A0A2N1YEV4_9GAMM  | L....NSDEISRRCLVLMMLNEAVRCLDEGIIRSPRDGDIGAVFGIGFPFLFGGPFPRYMDK  |
| tr A0A3P3QCM3 A0A3P3QCM3_9GAMM  | L....SGDQIALRCLVLMMLNEAVRCLDEGIIRSPRDGDIGAVFGIGFPFLFGGPFPRYMDK  |
| tr F7NT72 F7NT72_9GAMM          | L....GGDQIALRCLVLMMLNEAVRCLDEGIIRSPRDGDIGAVFGIGFPFLFGGPFPRYMDK  |
| tr A0A3S2TW63 A0A3S2TW63_9GAMM  | L....SGDQIALRCLVLMMLNEAVRCLDEGIIRSPRDGDIGAVFGIGFPFLFGGPFPRYMDK  |
| tr A0A3D5BGW7 A0A3D5BGW7_9GAMM  | L....SAEQISRRCLVLMMLNEAVRCLDEGIIRSPRDGDIGAVFGIGFPFLFGGPFPRYMDK  |
| tr A0A5C7TI17 A0A5C7TI17_9GAMM  | L....SSDQISRRCLVLMMLNEAVRCLDEGIIRSPRDGDIGAVFGIGFPFLFGGPFPRYMDK  |
| tr A0A0U4W982 A0A0U4W982_9GAMM  | .....STEQISRRCLVLMMLNEAVRCLDEGIIRSPRDGDIGAVFGIGFPFLFGGPFPRYMDK  |
| tr A0A2I0FCM2 A0A2I0FCM2_9GAMM  | M....APKALAEARVLLMLNEAVRCLDEGIIRSPRDGDIGAVFGIGFPFLFGGPFPRYMDK   |
| tr A0A2G2IVL1 A0A2G2IVL1_9GAMM  | M....APKALAEARVLLMLNEAVRCLDEGIIRSPRDGDIGAVFGIGFPFLFGGPFPRYMDK   |
| tr A6FT21 A6FT21_9GAMM          | M....APKALAEARVLLMLNEAVRCLDEGIIRSPRDGDIGAVFGIGFPFLFGGPFPRYMDK   |
| tr A0A4U1BNR2 A0A4U1BNR2_9GAMM  | L....SDSEIARCLVLMMLNEAVRCLDEGIIRSPRDGDIGAVFGIGFPFLFGGPFPRYMDK   |
| tr E1SQ60 E1SQ60_FERBD          | .....SQSELAEARVLLMLNEAVRCLDEGIIRSPRDGDIGAVFGIGFPFLFGGPFPRYMDK   |
| tr A0A4Y6IZ09 A0A4Y6IZ09_9GAMM  | .....EPRVAERCLVLMMLNEAVRCLDEGIIRSPRDGDIGAVFGIGFPFLFGGPFPRYMDK   |
| tr A0A0C3QSZ7 A0A0C3QSZ7_9GAMM  | .....EPRVAERCLVLMMLNEAVRCLDEGIIRSPRDGDIGAVFGIGFPFLFGGPFPRYMDK   |
| tr A0A6L7HXW0 A0A6L7HXW0_9GAMM  | .....EPRVAERCLVLMMLNEAVRCLDEGIIRSPRDGDIGAVFGIGFPFLFGGPFPRYMDK   |
| tr A3QFP3 FADJ_SHELP            | .....EPIALAEARVLLMLNEAVRCLDEGIIRSPRDGDIGAVFGIGFPFLFGGPFPRYMDK   |
| tr A0A1E5IXH7 A0A1E5IXH7_SHECO  | .....DAAEVQRCLVLMMLNEAVRCLDEGIIRSPRDGDIGAVFGIGFPFLFGGPFPRYMDK   |
| tr A0A411PKQ0 A0A411PKQ0_9GAMM  | .....DIKQVAERCLVLMMLNEAVRCLDEGIIRSPRDGDIGAVFGIGFPFLFGGPFPRYMDK  |
| tr A0A6G9QK63 A0A6G9QK63_9GAMM  | .....EAKVAERCLVLMMLNEAVRCLDEGIIRSPRDGDIGAVFGIGFPFLFGGPFPRYMDK   |
| tr A0A6P1UL63 A0A6P1UL63_9GAMM  | .....EAKVAERCLVLMMLNEAVRCLDEGIIRSPRDGDIGAVFGIGFPFLFGGPFPRYMDK   |
| tr A0A2N1ERI9 A0A2N1ERI9_9GAMM  | .....EAKVAERCLVLMMLNEAVRCLDEGIIRSPRDGDIGAVFGIGFPFLFGGPFPRYMDK   |
| tr A0A7W4FU55 A0A7W4FU55_9GAMM  | .....EAKVAERCLVLMMLNEAVRCLDEGIIRSPRDGDIGAVFGIGFPFLFGGPFPRYMDK   |
| tr A0A501XZY8 A0A501XZY8_9GAMM  | .....EMSAVAERCLVLMMLNEAVRCLDEGIIRSPRDGDIGAVFGIGFPFLFGGPFPRYMDK  |
| tr A0A2W5DCZ0 A0A2W5DCZ0_SHEOE  | .....EMSAVAERCLVLMMLNEAVRCLDEGIIRSPRDGDIGAVFGIGFPFLFGGPFPRYMDK  |
| tr A0A1E3V3C8 A0A1E3V3C8_9GAMM  | .....EMSAVAERCLVLMMLNEAVRCLDEGIIRSPRDGDIGAVFGIGFPFLFGGPFPRYMDK  |
| tr A0A1Z4AI20 A0A1Z4AI20_9GAMM  | .....EMSAVAERCLVLMMLNEAVRCLDEGIIRSPRDGDIGAVFGIGFPFLFGGPFPRYMDK  |
| tr A0A7X9LJL9 A0A7X9LJL9_9GAMM  | .....EMSAVAERCLVLMMLNEAVRCLDEGIIRSPRDGDIGAVFGIGFPFLFGGPFPRYMDK  |
| tr A0A073KMY5 A0A073KMY5_9GAMM  | .....EMSAVAERCLVLMMLNEAVRCLDEGIIRSPRDGDIGAVFGIGFPFLFGGPFPRYMDK  |
| tr A0A5B8R6W1 A0A5B8R6W1_9GAMM  | .....DLSVAERCLVLMMLNEAVRCLDDGIIASPRDGDIGAVFGIGFPFLFGGPFPRYMDK   |
| tr V1DAI4 V1DAI4_9GAMM          | .....DLSVAERCLVLMMLNEAVRCLDDGIIASPRDGDIGAVFGIGFPFLFGGPFPRYMDK   |
| tr A0A448CPQ4 A0A448CPQ4_SHEPU  | .....EMSSVAERCLVLMMLNEAVRCLDDGIIASPRDGDIGAVFGIGFPFLFGGPFPRYMDK  |
| tr A0A252ERQ3 A0A252ERQ3_SHEPU  | .....EMSAVAERCLVLMMLNEAVRCLDDGIIASPRDGDIGAVFGIGFPFLFGGPFPRYMDK  |
| tr Q0HKD1 FADJ_SHESM            | .....EMSAVAERCLVLMMLNEAVRCLDDGIIASPRDGDIGAVFGIGFPFLFGGPFPRYMDK  |
| tr Q0HWN3 FADJ_SHESR            | .....EMSAVAERCLVLMMLNEAVRCLDDGIIASPRDGDIGAVFGIGFPFLFGGPFPRYMDK  |
| tr F7RQE3 F7RQE3_9GAMM          | .....DAKVAERCLVLMMLNEAVRCLDEGIIRSPRDGDIGAVFGIGFPFLFGGPFPRYMDK   |
| tr B8EE98 B8EE98_SHEB2          | .....DAKVAERCLVLMMLNEAVRCLDEGIIRSPRDGDIGAVFGIGFPFLFGGPFPRYMDK   |
| tr A6WQ25 FADJ_SHEB8            | .....DAKVAERCLVLMMLNEAVRCLDEGIIRSPRDGDIGAVFGIGFPFLFGGPFPRYMDK   |
| tr A0A448EK41 A0A448EK41_9GAMM  | .....DAKVAERCLVLMMLNEAVRCLDEGIIRSPRDGDIGAVFGIGFPFLFGGPFPRYMDK   |
| tr A0A553JHX1 A0A553JHX1_SHEHA  | GANSSELAEVSRCLVLMMLNEAVRCLDEGIIRSPRDGDIGAVFGIGFPFLFGGPFPRYMDK   |
| tr B8CPY6 B8CPY6_SHEFW          | S....DANELALRCLVLMMLNEAVRCLDEGIIRSPRDGDIGAVFGIGFPFLFGGPFPRYMDK  |
| tr A0A431WFC4 A0A431WFC4_9GAMM  | SNK...DSQDVAKRCLVLMMLNEAVRCLDEGIIRSPRDGDIGAVFGIGFPFLFGGPFPRYMDK |
| tr A8FTR7 A8FTR7_SHESH          | SNN...DSQDVAKRCLVLMMLNEAVRCLDEGIIRSPRDGDIGAVFGIGFPFLFGGPFPRYMDK |
| tr A0A431WNL0 A0A431WNL0_9GAMM  | SNN...DSQDVAKRCLVLMMLNEAVRCLDEGIIRSPRDGDIGAVFGIGFPFLFGGPFPRYMDK |
| tr A0A550AEC5 A0A550AEC5_9GAMM  | G....EQSEVAQRCLVLMMLNEAVRCLDEGIIRSPRDGDIGAVFGIGFPFLFGGPFPRYMDK  |
| tr A0A7L4WW90 A0A7L4WW90_9GAMM  | G....EQSEVAQRCLVLMMLNEAVRCLDEGIIRSPRDGDIGAVFGIGFPFLFGGPFPRYMDK  |
| tr A9DDU3 A9DDU3_9GAMM          | G....ELADVAERCLVLMMLNEAVRCLDEGIIRSPRDGDIGAVFGIGFPFLFGGPFPRYMDK  |
| tr A0A330M2B9 A0A330M2B9_9GAMM  | G....ELADVAERCLVLMMLNEAVRCLDEGIIRSPRDGDIGAVFGIGFPFLFGGPFPRYMDK  |
| tr A0A5N8UFC7 A0A5N8UFC7_9GAMM  | .....EVSEVAQRCLVLMMLNEAVRCLDEGIIRSPRDGDIGAVFGIGFPFLFGGPFPRYMDK  |
| tr A0A1S6HN57 A0A1S6HN57_9GAMM  | .....EVSEVAQRCLVLMMLNEAVRCLDEGIIRSPRDGDIGAVFGIGFPFLFGGPFPRYMDK  |
| tr D4ZMH7 D4ZMH7_SHEVD          | .....EVSEVAQRCLVLMMLNEAVRCLDEGIIRSPRDGDIGAVFGIGFPFLFGGPFPRYMDK  |
| tr A0A3L8Q213 A0A3L8Q213_9GAMM  | H....DPKVTQRCVLMMLNEAVRCLDEGIIRSPRDGDIGAVFGIGFPFLFGGPFPRYMDK    |
| tr A0A3A6U4N9 A0A3A6U4N9_9GAMM  | K....EASKLQRCVLMMLNEAVRCLDEGIIRSPRDGDIGAVFGIGFPFLFGGPFPRYMDK    |
| tr A0A4Q5MA37 A0A4Q5MA37_9GAMM  | K....DPKMVAERCLVLMMLNEAVRCLDEGIIRSPRDGDIGAVFGIGFPFLFGGPFPRYMDK  |
| tr A0A1L6LSX5 A0A1L6LSX5_9DELTA | V....AVEEIQMRCLVLMMLNEAVRCLDEGIIRSPRDGDIGAVFGIGFPFLFGGPFPRYMDK  |
| tr A0A2W4L9B9 A0A2W4L9B9_9PROT  | F....SREEIQRCLVLMMLNEAVRCLDEGIIRSPRDGDIGAVFGIGFPFLFGGPFPRYMDK   |
| tr A0A2W4M4E6 A0A2W4M4E6_9PROT  | .....PVADVQRCLVLMMLNEAVRCLDEGIIRSPRDGDIGAVFGIGFPFLFGGPFPRYMDK   |
| tr A0A6I2GRX9 A0A6I2GRX9_9DELTA | L....DRQEMARCLVLMMLNEAVRCLDEGIIRSPRDGDIGAVFGIGFPFLFGGPFPRYMDK   |
| tr A0A0H4WMK2 A0A0H4WMK2_9DELTA | F....DRQEMARCLVLMMLNEAVRCLDEGIIRSPRDGDIGAVFGIGFPFLFGGPFPRYMDK   |
| tr F8CJ36 F8CJ36_MYXFH          | F....DRQEMARCLVLMMLNEAVRCLDEGIIRSPRDGDIGAVFGIGFPFLFGGPFPRYMDK   |
| tr A0A250K0F1 A0A250K0F1_9DELTA | F....DRQEMARCLVLMMLNEAVRCLDEGIIRSPRDGDIGAVFGIGFPFLFGGPFPRYMDK   |
| tr A0A7Y6WFZ2 A0A7Y6WFZ2_9DELTA | F....DRQEMARCLVLMMLNEAVRCLDEGIIRSPRDGDIGAVFGIGFPFLFGGPFPRYMDK   |
| tr A0A7Y7C660 A0A7Y7C660_9DELTA | F....DRQEMARCLVLMMLNEAVRCLDEGIIRSPRDGDIGAVFGIGFPFLFGGPFPRYMDK   |
| tr A0A7Y4JFH2 A0A7Y4JFH2_MYXXA  | F....DRQEMARCLVLMMLNEAVRCLDEGIIRSPRDGDIGAVFGIGFPFLFGGPFPRYMDK   |
| tr A0A4Y6CZQ9 A0A4Y6CZQ9_MYXXA  | F....DRQEMARCLVLMMLNEAVRCLDEGIIRSPRDGDIGAVFGIGFPFLFGGPFPRYMDK   |

tr|A0A7Y4IKV5|A0A7Y4IKV5\_MYXXA F...DRAEMAERVVLQMVNEAIRCLGEGVLSARDGDVGAIFGLGFPFLGGPFHYVDS  
tr|A0A511HHB0|A0A511HHB0\_9DELT F...DRAEMAERVVLQMVNEAIRCLGEGILRSARDGDVGAIFGLGFPFLGGPFHYVDS  
tr|A0A4Y6CKY7|A0A4Y6CKY7\_MYXXA F...DRAEMAERVVLQMVNEAIRCLGEGILRSARDGDVGAIFGLGFPFLGGPFHYVDS  
tr|Q1D1F2|Q1D1F2\_MYXXD F...DRAEMAERVVLQMVNEAIRCLGEGILRSARDGDVGAIFGLGFPFLGGPFHYVDS  
tr|A0A7Y4MA14|A0A7Y4MA14\_MYXXA F...DRAEMAERVVLQMVNEAIRCLGEGILRSARDGDVGAIFGLGFPFLGGPFHYVDS  
tr|A0A7T8Y4N9|A0A7T8Y4N9\_MYXXA F...DRAEMAERVVLQMVNEAIRCLGEGILRSARDGDVGAIFGLGFPFLGGPFHYVDS  
tr|L7UE67|L7UE67\_MYXSD F...DAAEMAERLVLQMVNEAIRCLGEGILRSARDGDVGAIFGLGFPFLGGPFHYADS  
tr|A0A511T9X1|A0A511T9X1\_MYXFU F...DASEMAERLVLQMVNEAIRCLGEGILRSARDGDVGAIFGLGFPFLGGPFHYADA  
tr|A0A7Y7C9C4|A0A7Y7C9C4\_9DELT F...DASEMAERLVLQMVNEAIRCLGEGILRSARDGDVGAIFGLGFPFLGGPFHYADS  
tr|A0A540X7W8|A0A540X7W8\_9DELT F...DASEMAERLVLQMVNEAIRCLGEGILRSARDGDVGAIFGLGFPFLGGPFHYADS  
tr|A0A3A85FK19|A0A3A85FK19\_9DELT M...ERAEMAERCALQMVNEAIRCLGENILRSARDGDVGAIFGLGFPFLGGPFHYADS  
tr|A0A3A8JQL9|A0A3A8JQL9\_9DELT L...DAAEMAERVALQMVNEAIRCLGEGILRSARDGDVGAIFGLGFPFLGGPFHYADA  
tr|A0A7Y4NFA4|A0A7Y4NFA4\_9DELT L...DASEMAERVALQMVNEAIRCLGEGILRSARDGDVGAIFGLGFPFLGGPFHYADA  
tr|A0A3A8HDQ7|A0A3A8HDQ7\_9DELT L...DASEMAERVALQMVNEAIRCLGEGILRSARDGDVGAIFGLGFPFLGGPFHYADA  
tr|A0A3A8GR90|A0A3A8GR90\_9DELT L...DASEMAERVALQMVNEAIRCLGEGILRSARDGDVGAIFGLGFPFLGGPFHYADA  
tr|A0A3A8SBD7|A0A3A8SBD7\_9DELT L...DPAEMAERVALQMVNEAIRCLGEGILRSARDGDVGAIFGLGFPFLGGPFHYADA  
tr|A0A3A8T0I8|A0A3A8T0I8\_9DELT L...DPAEMAERVALQMVNEAIRCLGEGILRSARDGDVGAIFGLGFPFLGGPFHYADA  
tr|A0A7X5BU07|A0A7X5BU07\_9DELT L...DPAEMAERVALQMVNEAIRCLGEGILRSARDGDVGAIFGLGFPFLGGPFHYADA  
tr|A0A7Y1RVL2|A0A7Y1RVL2\_9DELT L...DPAEMAERVALQMVNEAIRCLGEGILRSARDGDVGAIFGLGFPFLGGPFHYADA  
tr|A0A3A8THN2|A0A3A8THN2\_9DELT L...DPAEMAERVALQMVNEAIRCLGEGILRSARDGDVGAIFGLGFPFLGGPFHYADA  
tr|A0A7Y1RX76|A0A7Y1RX76\_9DELT L...DPAEMAERVALQMVNEAIRCLGEGILRSARDGDVGAIFGLGFPFLGGPFHYADA  
tr|A0A3A8RA58|A0A3A8RA58\_9DELT L...DASEMAERVALQMVNEAIRCLGEGILRSARDGDVGAIFGLGFPFLGGPFHYADA  
tr|A0A410RPB6|A0A410RPB6\_CORCK L...DAAEMAERVALQMVNEAIRCLGEGILRSARDGDVGAIFGLGFPFLGGPFHYADA  
tr|A0A7Y4J474|A0A7Y4J474\_CORCK L...DAAEMAERVALQMVNEAIRCLGEGILRSARDGDVGAIFGLGFPFLGGPFHYADA  
tr|A0A3A8I9Z6|A0A3A8I9Z6\_9DELT L...DAAEMAERVALQMVNEAIRCLGEGILRSARDGDVGAIFGLGFPFLGGPFHYADA  
tr|H8MKE9|H8MKE9\_CORCM L...EASEMAERVALQMVNEAIRCLGEGILRNARDGDVGAIFGLGFPFLGGPFHYADA  
tr|A0A3A8H102|A0A3A8H102\_9DELT L...DAAEMAERVALQMVNEAIRCLGEGVLSARDGDVGAIFGLGFPFLGGPFHYADA  
tr|A0A554FW33|A0A554FW33\_9DELT M...DPTEMAERCALQMVNEAIRCLGEGILRSARDGDVGAIFGLGFPFLGGPFRYADS  
tr|A0A3A8NPC0|A0A3A8NPC0\_9DELT M...DPTEMAERCALQMVNEAIRCLGEGILRSARDGDVGAIFGLGFPFLGGPFRYADS  
tr|A0A3A8JUV3|A0A3A8JUV3\_9DELT M...DPTEMAERCALQMVNEAIRCLGEGILRSARDGDVGAIFGLGFPFLGGPFRYADS  
tr|A0A3A8NEX6|A0A3A8NEX6\_9DELT M...DPTEMAERCALQMVNEAIRCLGEGILRSARDGDVGAIFGLGFPFLGGPFRYADS  
tr|A0A3A8JEU8|A0A3A8JEU8\_9DELT L...DAAEMAERCALQMVNEAIRCLGEGILRSARDGDVGAIFGLGFPFLGGPFRYADS  
tr|A0A3A8LI76|A0A3A8LI76\_9DELT L...DPAEMAERVALQMVNEAIRCLGEGILRSARDGDVGAIFGLGFPFLGGPFRYADS  
tr|A0A085WXN8|A0A085WXN8\_9DELT F...DRTEMAERCALQMVNEAIRCLGEGILRSARDGDVGAIFGLGFPFLGGPFRYADS  
tr|A0A2T4V0M5|A0A2T4V0M5\_9DELT I...DAREMAERCALQMVNEAVRCLGEGILRSARDGDVGAIFGLGFPFLGGPFRYADS  
tr|A0A0G2ZSW5|A0A0G2ZSW5\_9DELT L...DAREMAERCALQMVNEAVRCLGEGILRSARDGDVGAIFGLGFPFLGGPFRYADS  
tr|A0A3M2DKY0|A0A3M2DKY0\_9DELT M...APEEIAARRCALQMVNEAAYCFGDGILRCARDGDIGAVFGLGFPFLGGPFRYADA  
tr|A0A661NQ58|A0A661NQ58\_9DELT . . . . .PSAEIAERCTLQMVNEAIHCLGEGILRSARDGDIGAVFGLGFPFLGGPFRYVDT  
tr|A0A520YD99|A0A520YD99\_9DELT V...SNEDIAWRCALQFVNEACRCFGDGLRSARDGDIGAVFGLGFPFLGGPFRFVDQ  
tr|A0A7Y3BRE4|A0A7Y3BRE4\_9DELT V...SNEDIAWRCALQFVNEACRCFGDGLRSARDGDIGAVFGLGFPFLGGPFRFVDQ  
tr|A0A2D9TF90|A0A2D9TF90\_9DELT L...SNDDIAWRCALQMVNEAVLCLFEGILRSARDGDIGAVFGLGFPFLGGPFRFVDL  
tr|A0A2E0TP32|A0A2E0TP32\_9DELT L...SAAEIAWRCTLQMVNEACLQFQGLRSARDGDIGAVFGLGFPFLGGPFRFVDA  
tr|A0A2E4Y3V1|A0A2E4Y3V1\_9PROT S...DE.ELQKRIAYRMINESALCLQENIKNPIDGDIGAVFGLGFPFLGGPFRYLDL  
tr|A0A2E6VRH4|A0A2E6VRH4\_9DELT . . . . .DPAVQQRMALRFVNEAVLCLQEGILFSPVEGDIGAVFGLGFPFLMRGPFRRHVS  
tr|A0A1F9FB59|A0A1F9FB59\_9DELT V...DERELQERIGLRMVNEAVQCLQDGILEGPVGDAGAVFGLGFPFLMTGPFRRYVDA





tr|A0A7Y4IKV5|A0A7Y4IKV5\_MYXXA|RGPAEVLRRKLEHYHDKLGERFPAPAPHLVEMVKAG...KTFYPR...  
tr|A0A511HHB0|A0A511HHB0\_9DELT|RGPAEVLRRKLEHYHDKLGERFPAPAPHLVEMVKAG...KTFYPR...  
tr|A0A4Y6CKY7|A0A4Y6CKY7\_MYXXA|RGPAEVLRRKLEHYHDKLGERFPAPAPHLVEMVKAG...KTFYPR...  
tr|Q1D1F2|Q1D1F2\_MYXXD|RGPAEVLRRKLEHYHDKLGERFPAPAPHLVEMVKAG...KTFYPR...  
tr|A0A7Y4MA14|A0A7Y4MA14\_MYXXA|RGPAEVLRRKLEHYHDKLGERFPAPAPHLVEMVKAG...KTFYPR...  
tr|A0A7T8Y4N9|A0A7T8Y4N9\_MYXXA|RGPAEVLRRKLEHYHDKLGERFPAPAPHLVEMVKAG...KTFYPR...  
tr|L7UB67|L7UB67\_MYXSD|VGAAELLRKLEHYQDKLGERFTPAPLLEEHVKAG...KTFYPR...  
tr|A0A511T9X1|A0A511T9X1\_MYXFU|RGLSEVLRKLEHYQDKLGERFTPAPLLVEMVKEG...KTFYPR...  
tr|A0A7Y7C9C4|A0A7Y7C9C4\_9DELT|RGPAEVLRRKLEHYQDKLGERFTPAPLLVEMVKAG...KTFYPR...  
tr|A0A540X7W8|A0A540X7W8\_9DELT|MGPAELLRKLEHYQDKLGERFTPAPLLVEMVKAG...KTFYPR...  
tr|A0A3A5FK19|A0A3A5FK19\_9DELT|LGPAQLLRKLEHYQDKFGERFTPAPFLIEQVRAG...KSFHGG...  
tr|A0A3A8JQL9|A0A3A8JQL9\_9DELT|LGPANLLRKLLEHYQDKYGERFTPAPLLVEKVRAG...KGFYEA...  
tr|A0A7Y4NFA4|A0A7Y4NFA4\_9DELT|LGPANLLRKLLEHYQDKYGERFTPAPLLVEKVRAG...KGFHEA...  
tr|A0A3A8HDQ7|A0A3A8HDQ7\_9DELT|LGPANLLRKLLEHYQDKYGERFTPAPLLVEKVRAG...KGFYEA...  
tr|A0A3A8GR90|A0A3A8GR90\_9DELT|LGPANLLRKLLEHYQDKYGERFTPAPLLVEKVRAS...KGFYEA...  
tr|A0A3A8SBD7|A0A3A8SBD7\_9DELT|LGPANLLRKLLEHYQDKYGERFTPAPLLVEKVRAN...KGFYES...  
tr|A0A3A8T0I8|A0A3A8T0I8\_9DELT|LGPANLLRKLLEHYQDKYGERFTPAPLLVEKVRAN...KGFYES...  
tr|A0A7X5BU07|A0A7X5BU07\_9DELT|LGPANLLRKLLEHYQDKYGERFTPAPLLVEKVRAN...KGFYES...  
tr|A0A7Y1RVL2|A0A7Y1RVL2\_9DELT|LGPANLLRKLLEHYQDKYGERFTPAPLLVEKVRAN...KGFYES...  
tr|A0A3A8THN2|A0A3A8THN2\_9DELT|LGPANLLRKLLEHYQDKYGERFTPAPLLVEKVRAN...KGFYES...  
tr|A0A7Y1RX76|A0A7Y1RX76\_9DELT|LGPANLLRKLLEHYQDKYGERFTPAPLLVEKVRAN...KGFYES...  
tr|A0A3A8RA58|A0A3A8RA58\_9DELT|LGPANLLRKLLEHYQDKYGERFTPAPLLVEKVRAN...KGFYES...  
tr|A0A410RPB6|A0A410RPB6\_CORCK|LGPANLLRKLLEHYHDKYGERFTPAPLLVEKVRAG...KGFYES...  
tr|A0A7Y4J474|A0A7Y4J474\_CORCK|LGPANLLRKLLEHYQDKYGERFTPAPLLVEKVRDG...KGFYEA...  
tr|A0A3A8I9Z6|A0A3A8I9Z6\_9DELT|LGPANLLRKLLEHYQDKYGERFTPAPLLVEKVRDG...KGFYES...  
tr|H8MKE9|H8MKE9\_CORCM|LGPANLLRKLLEHYQDKYGERFTPAPLLVEKVRAG...KGFYES...  
tr|A0A3A8H102|A0A3A8H102\_9DELT|LGPANLLRKLLEHYQDKYGERFTPAPLLVEKVRAG...KGFYES...  
tr|A0A554FW33|A0A554FW33\_9DELT|LGPANLLRKLLEHYQDKYGERFTPAPLLVEKVKAG...KGFYEA...  
tr|A0A3A8NPC0|A0A3A8NPC0\_9DELT|LGPANLLRKLLEHYQDKYGERFTPAPLLVEKVKAG...KGFYEA...  
tr|A0A3A8JUV3|A0A3A8JUV3\_9DELT|LGLDNLLRKLLEHYQDKYGERFTPAPLLVEKVKAG...KGFYEA...  
tr|A0A3A8NEX6|A0A3A8NEX6\_9DELT|LGPANLLRKLLEHYQDKYGERFTPAPLLVEKVKAG...KGFYEA...  
tr|A0A3A8JEU8|A0A3A8JEU8\_9DELT|LGAHLLRKLLEHYQDKYGERFTPAPLLVEKVRTG...KGFYDA...  
tr|A0A3A8LI76|A0A3A8LI76\_9DELT|LGAHLLRKLLEHYQDKYGERFTPAPLLLEKVRAG...KGFYDA...  
tr|A0A085WXN8|A0A085WXN8\_9DELT|LTPAVLLRKLLEHYQDKYGERFTPAPHLVDVNVAG...KTFHSR...  
tr|A0A2T4V0M5|A0A2T4V0M5\_9DELT|IGPAELLRRLLEHYQDKYGERFTPAPSLVEMVKAG...KTFYPR...  
tr|A0A0G2ZSW5|A0A0G2ZSW5\_9DELT|LGPAELLRRLLEHYQDKYGERFTPAPSLVDMVKAG...KTFYPR...  
tr|A0A3M2DKY0|A0A3M2DKY0\_9DELT|LGI AALVDQLDYAGEYGRWAPAPVLRDMAAG...QTFHGPSAAPPRAATRKS...  
tr|A0A661NQ58|A0A661NQ58\_9DELT|VGAQVFLERVEHYRDRYGARFEPAPLLVEKARGG...ATFY...  
tr|A0A520YD99|A0A520YD99\_9DELT|VGAKEILGRLELEKQLGPRFSPAPVLEEIARSG...QTFHGSDPVQPGQSRGNQAPSS...  
tr|A0A7Y3BRE4|A0A7Y3BRE4\_9DELT|VGAKEILGRLELEKQLGPRFSPAPVLEEIARSG...QTFHGSDPVQPGQSRGNQAPSS...  
tr|A0A2D9TF90|A0A2D9TF90\_9DELT|HGPDAIVKRMQAFQEKQYGSRFAPAPLLLAMAQQ...LTFHGAGAVQPGQDVPQTVIDT...  
tr|A0A2E0TP32|A0A2E0TP32\_9DELT|VGAREVVRKLNQFEKRVGPRFAPAPILLAMAEN...LTFHGENTVTPGEIPT...  
tr|A0A2E4Y3V1|A0A2E4Y3V1\_9PROT|VGAQSFVLRNKKFEDRYGERFKVATIEDYAKEN...KFFHG...  
tr|A0A2E6VRH4|A0A2E6VRH4\_9DELT|EGVSEVVRQLKLEDEFGARYTPAQMVLVDMAKKG...ERFHPA...  
tr|A0A1F9FB59|A0A1F9FB59\_9DELT|VGASTVVSTLERFAARYGKRFKPAELLVLDQAKSG...KRFFHAKG...

ECHA\_HUMAN

ECHA\_HUMAN  
tr|A0A4R6XLA8|A0A4R6XLA8\_9GAMM .....  
tr|A0A6A0IJT2|A0A6A0IJT2\_9BACT .....  
tr|A0A7V3QZU7|A0A7V3QZU7\_9BACT .....  
tr|A0A7V4SYJ6|A0A7V4SYJ6\_9BACT .....  
tr|A0A2A8D2N6|A0A2A8D2N6\_9BACT .....  
tr|A0A2N1TGP0|A0A2N1TGP0\_9SPIR .....  
tr|A0A1G3QGW4|A0A1G3QGW4\_9SPIR .....  
tr|A0A1G3QTY3|A0A1G3QTY3\_9SPIR .....  
tr|A0A7X9L359|A0A7X9L359\_9DELT .....  
tr|A0A522CJY0|A0A522CJY0\_9SPIR .....  
tr|A0A2N1RRJ3|A0A2N1RRJ3\_9SPIR .....  
tr|A0A2N2KFN7|A0A2N2KFN7\_9DELT .....  
tr|A0A1V6AXX9|A0A1V6AXX9\_9DELT .....  
tr|A0A2N2HZL0|A0A2N2HZL0\_9DELT .....  
tr|A0A5E8ARP3|A0A5E8ARP3\_9BACT .....  
tr|A0A662A7B1|A0A662A7B1\_9BACT .....  
tr|D7CV16|D7CV16\_TRURR .....  
tr|A0A3C2AKX4|A0A3C2AKX4\_9FLAO .....  
tr|A0A3B8ZLN3|A0A3B8ZLN3\_9PLAN .....  
tr|A0A345UGV8|A0A345UGV8\_9BACT .....  
tr|A0A6C1P6A2|A0A6C1P6A2\_9BACT .....  
tr|A0A3MLX9W8|A0A3MLX9W8\_9BACT .....  
tr|A0A354C796|A0A354C796\_9DELT .....  
tr|A0A3M1NUM8|A0A3M1NUM8\_9BACT .....  
tr|A0A3M2KRC8|A0A3M2KRC8\_9BACT .....  
tr|A0A5S9IHR0|A0A5S9IHR0\_9BACT .....  
tr|A0A6M1ST81|A0A6M1ST81\_9BACT .....  
tr|A0A521AAE5|A0A521AAE5\_9BACT .....  
tr|A0A1M4ZMD6|A0A1M4ZMD6\_9BACT .....  
tr|A0A2A2GCS2|A0A2A2GCS2\_9BACT .....  
tr|A0A5D3YIH7|A0A5D3YIH7\_9BACT .....  
tr|A0A6M1T9G0|A0A6M1T9G0\_9BACT .....  
tr|A0A6A8Q1Y8|A0A6A8Q1Y8\_9BACT .....  
tr|A0A521BVJ3|A0A521BVJ3\_9BACT .....  
tr|A0A359E0Y8|A0A359E0Y8\_9BACT .....  
tr|A0A2D8CIM6|A0A2D8CIM6\_9BACT .....  
tr|A0A2D9FWF5|A0A2D9FWF5\_9BACT .....  
tr|A0A1B6YB70|A0A1B6YB70\_9BACT .....  
tr|A0A2D4ZTC0|A0A2D4ZTC0\_9BACT .....  
tr|A0A3D4UVW7|A0A3D4UVW7\_9BACT .....  
tr|A0A3F3I3M2|A0A3F3I3M2\_9BACT .....  
tr|A0A3D1G7L9|A0A3D1G7L9\_9BACT .....  
tr|A0A3M8G1Y8|A0A3M8G1Y8\_9BACT .....  
tr|A0A5Q4F391|A0A5Q4F391\_9BACT .....  
tr|A0A6I7NPV0|A0A6I7NPV0\_9BACT .....  
tr|A0A651G1J2|A0A651G1J2\_9BACT .....  
tr|A0A371QRK5|A0A371QRK5\_9BACT .....  
tr|A0A2N0VGJ5|A0A2N0VGJ5\_9BACT .....  
tr|A0A316TYJ0|A0A316TYJ0\_9BACT .....  
tr|A0A651GLZ8|A0A651GLZ8\_9BACT .....  
tr|A0A7Y5V3S5|A0A7Y5V3S5\_9BACT .....  
tr|A0A7W1SHC0|A0A7W1SHC0\_9BACT .....  
tr|A0A7Y5PBT7|A0A7Y5PBT7\_9BACT .....  
tr|A0A7Y5TXL8|A0A7Y5TXL8\_9BACT .....  
tr|A0A423PQ96|A0A423PQ96\_9GAMM .....  
tr|U2G066|U2G066\_9GAMM .....  
tr|A0A2E0J1F4|A0A2E0J1F4\_9GAMM .....  
tr|A0A2D4SCM8|A0A2D4SCM8\_9GAMM .....  
tr|LOWJH1|LOWJH1\_9GAMM .....  
tr|A0A1H5XF61|A0A1H5XF61\_9GAMM .....  
tr|A0A2E9TS48|A0A2E9TS48\_9GAMM .....  
tr|A0A095UE19|A0A095UE19\_9GAMM .....  
tr|A0A7G2S9A0|A0A7G2S9A0\_9GAMM .....  
tr|B5JU27|B5JU27\_9GAMM .....  
tr|A0A1Y0IHP1|A0A1Y0IHP1\_9GAMM .....  
tr|A0A316FZ14|A0A316FZ14\_9GAMM .....  
tr|A0A498C231|A0A498C231\_9GAMM .....  
tr|Q0A6T4|Q0A6T4\_ALKEH .....  
tr|A0A3E0WL10|A0A3E0WL10\_9GAMM .....  
tr|A0A3S1BU16|A0A3S1BU16\_9GAMM .....  
tr|A0A7V8QFN9|A0A7V8QFN9\_9GAMM .....  
tr|A0A1H8PPF9|A0A1H8PPF9\_9GAMM .....  
tr|A0A6H0J0V7|A0A6H0J0V7\_9GAMM .....  
tr|V5EZX6|V5EZX6\_9VIBR .....  
tr|A0A6I1QBM2|A0A6I1QBM2\_9VIBR .....  
tr|A0A511QRL5|A0A511QRL5\_9VIBR .....  
tr|A0A7Y0JZP4|A0A7Y0JZP4\_9VIBR .....  
tr|A0A193KD24|A0A193KD24\_9VIBR .....  
tr|A0A1S1HM72|A0A1S1HM72\_PROST .....  
tr|A0A7T8I613|A0A7T8I613\_9GAMM .....  
tr|A0A140NIF0|A0A140NIF0\_PROSM .....  
tr|A0A379GMB7|A0A379GMB7\_PROST .....  
tr|A0A379H393|A0A379H393\_PROST .....  
tr|B2Q0L5|B2Q0L5\_PROST .....  
tr|A0A6I3JUE9|A0A6I3JUE9\_9GAMM .....  
tr|A0A7D4P594|A0A7D4P594\_YERMW .....  
tr|A0A7U7IVK6|A0A7U7IVK6\_YEREN .....  
tr|A0A447RIF5|A0A447RIF5\_YEREN .....  
tr|A0A7H4ZLV9|A0A7H4ZLV9\_YERP4 .....  
tr|A0A0H3NX46|A0A0H3NX46\_YERE1 .....  
tr|A0A7T9XUV7|A0A7T9XUV7\_YEREN .....  
tr|A0A7U7IYV8|A0A7U7IYV8\_YEREN .....  
tr|A0A0H5G7G2|A0A0H5G7G2\_YEREN .....  
tr|A0A2A7TDI2|A0A2A7TDI2\_YERKR .....  
tr|A0A0T9M261|A0A0T9M261\_YERKR .....  
tr|A0A0A0CMP1|A0A0A0CMP1\_PHOLU .....  
tr|A0A329VG55|A0A329VG55\_9GAMM .....  
sp|Q7N288|FADJ\_PHOLL .....  
tr|A0A6L9JMX5|A0A6L9JMX5\_PHOLM .....  
tr|A0A7X5HQ29|A0A7X5HQ29\_PHOLM .....  
tr|A0A1C0U051|A0A1C0U051\_9GAMM .....  
tr|A0A7X5QF62|A0A7X5QF62\_9GAMM .....

tr|A0A2D0KWM9|A0A2D0KWM9\_9GAMM .....  
tr|A0A2D0LAI1|A0A2D0LAI1\_9GAMM .....  
tr|A0A2D0IXC8|A0A2D0IXC8\_XENBU .....  
tr|W1JAM5|W1JAM5\_9GAMM .....  
tr|A0A3D9UED3|A0A3D9UED3\_9GAMM .....  
tr|A0A1I3JCA9|A0A1I3JCA9\_9GAMM .....  
tr|A0A068QUL9|A0A068QUL9\_9GAMM .....  
tr|A0A0M0TCH6|A0A0M0TCH6\_9GAMM .....  
tr|A0A1Q5U854|A0A1Q5U854\_9GAMM .....  
tr|A0A2D0ISP1|A0A2D0ISP1\_9GAMM .....  
tr|A0A1Q5TUI8|A0A1Q5TUI8\_9GAMM .....  
tr|A0A2D0KJI7|A0A2D0KJI7\_9GAMM .....  
tr|A0A1Y2SB97|A0A1Y2SB97\_9GAMM .....  
tr|A0A1I5DWI7|A0A1I5DWI7\_9GAMM .....  
tr|A0A1I7GWY6|A0A1I7GWY6\_9GAMM .....  
tr|D3VKY8|D3VKY8\_XENNA .....  
tr|A0A2G0Q6Q9|A0A2G0Q6Q9\_9GAMM .....  
tr|A0A2D0JU24|A0A2D0JU24\_9GAMM .....  
tr|A0A0J5FN38|A0A0J5FN38\_9GAMM .....  
tr|A0A432XLD4|A0A432XLD4\_9GAMM .....  
tr|A0A2D8HU84|A0A2D8HU84\_9GAMM .....  
tr|A0A656X1Q2|A0A656X1Q2\_9GAMM .....  
tr|A0A4Q1QH79|A0A4Q1QH79\_9GAMM .....  
tr|A0A1G7LQE6|A0A1G7LQE6\_9GAMM .....  
tr|A0A432YVG7|A0A432YVG7\_9GAMM .....  
tr|A0A1J5N0P5|A0A1J5N0P5\_9GAMM .....  
tr|A0A0D8D548|A0A0D8D548\_9GAMM .....  
tr|A0A3E0TNM2|A0A3E0TNM2\_9GAMM .....  
tr|A0A3E0UD67|A0A3E0UD67\_9GAMM .....  
tr|A0A3E0U0P4|A0A3E0U0P4\_9GAMM .....  
tr|A0A0M2V8B1|A0A0M2V8B1\_9GAMM .....  
tr|A0A285ITY5|A0A285ITY5\_9GAMM .....  
tr|A0A486XTB9|A0A486XTB9\_9GAMM .....  
tr|I1E1G1|I1E1G1\_9GAMM .....  
tr|A0A1H6KJ68|A0A1H6KJ68\_9GAMM .....  
tr|A0A0X3Y764|A0A0X3Y764\_9GAMM .....  
tr|A0A2N1YEV4|A0A2N1YEV4\_9GAMM .....  
tr|A0A3P3QCM3|A0A3P3QCM3\_9GAMM .....  
tr|F7NT72|F7NT72\_9GAMM .....  
tr|A0A3S2TW63|A0A3S2TW63\_9GAMM .....  
tr|A0A3D5BGW7|A0A3D5BGW7\_9GAMM .....  
tr|A0A5C7TI17|A0A5C7TI17\_9GAMM .....  
tr|A0A0U4W982|A0A0U4W982\_9GAMM .....  
tr|A0A2I0FCM2|A0A2I0FCM2\_9GAMM .....  
tr|A0A2G2IVL1|A0A2G2IVL1\_9GAMM .....  
tr|A6FI21|A6FI21\_9GAMM .....  
tr|A0A4U1BNN2|A0A4U1BNN2\_9GAMM .....  
tr|E1SQ60|E1SQ60\_FERBD .....  
tr|A0A4Y6IZ09|A0A4Y6IZ09\_9GAMM .....  
tr|A0A0C3QSZ7|A0A0C3QSZ7\_9GAMM .....  
tr|A0A6L7HXW0|A0A6L7HXW0\_9GAMM .....  
sp|A3QFP3|FADJ\_SHELP .....  
tr|A0A1E5IXH7|A0A1E5IXH7\_SHECO .....  
tr|A0A411PKQ0|A0A411PKQ0\_9GAMM .....  
tr|A0A6G9QKM3|A0A6G9QKM3\_9GAMM .....  
tr|A0A6P1UL63|A0A6P1UL63\_9GAMM .....  
tr|A0A2N1ERI9|A0A2N1ERI9\_9GAMM .....  
tr|A0A7W4FU55|A0A7W4FU55\_9GAMM .....  
sp|Q8ECP7|FADJ\_SHEON .....  
tr|A0A501XZY8|A0A501XZY8\_9GAMM .....  
tr|A0A2W5DCZ0|A0A2W5DCZ0\_SHEOE .....  
tr|A0A1E3V3C8|A0A1E3V3C8\_9GAMM .....  
tr|A0A1Z4AI20|A0A1Z4AI20\_9GAMM .....  
tr|A0A7X9LJL9|A0A7X9LJL9\_9GAMM .....  
tr|A0A073KMY5|A0A073KMY5\_9GAMM .....  
sp|A0KV76|FADJ\_SHESA .....  
tr|A0A220UTH7|A0A220UTH7\_9GAMM .....  
tr|A0A5B8R6W1|A0A5B8R6W1\_9GAMM .....  
tr|V1DAI4|V1DAI4\_9GAMM .....  
tr|A0A448CPQ4|A0A448CPQ4\_SHEPU .....  
tr|A0A252ERQ3|A0A252ERQ3\_SHEPU .....  
sp|Q0HKD1|FADJ\_SHESM .....  
sp|Q0HWN3|FADJ\_SHESR .....  
tr|F7RQE3|F7RQE3\_9GAMM .....  
tr|B8EE98|B8EE98\_SHEB2 .....  
sp|A6WQ25|FADJ\_SHEB8 .....  
tr|A0A448EK41|A0A448EK41\_9GAMM .....  
tr|A0A553JHX1|A0A553JHX1\_SHEHA .....  
tr|B8CPY6|B8CPY6\_SHEFW .....  
tr|A0A431WFC4|A0A431WFC4\_9GAMM .....  
tr|A8FTR7|A8FTR7\_SHESH .....  
tr|A0A431WNL0|A0A431WNL0\_9GAMM .....  
tr|A0A550AEC5|A0A550AEC5\_9GAMM .....  
tr|A0A7L4WW90|A0A7L4WW90\_9GAMM .....  
tr|A9DDU3|A9DDU3\_9GAMM .....  
tr|A0A330M2B9|A0A330M2B9\_9GAMM .....  
tr|A0A5N8UFC7|A0A5N8UFC7\_9GAMM .....  
tr|A0A1S6HN57|A0A1S6HN57\_9GAMM .....  
tr|D4ZMH7|D4ZMH7\_SHEVD .....  
tr|A0A3L8Q213|A0A3L8Q213\_9GAMM .....  
tr|A0A3A6U4N9|A0A3A6U4N9\_9GAMM .....  
tr|A0A4Q5MA37|A0A4Q5MA37\_9GAMM .....  
tr|A0A1L6LSX5|A0A1L6LSX5\_9DELT .....  
tr|A0A2W4L9B9|A0A2W4L9B9\_9PROT .....  
tr|A0A2W4M4E6|A0A2W4M4E6\_9PROT .....  
tr|A0A6I2GRX9|A0A6I2GRX9\_9DELT .....  
tr|A0A0H4WMK2|A0A0H4WMK2\_9DELT .....  
tr|F8CJ36|F8CJ36\_MYXFH .....  
tr|A0A250K0F1|A0A250K0F1\_9DELT .....  
tr|A0A7Y6WFZ2|A0A7Y6WFZ2\_9DELT .....  
tr|A0A7Y7C660|A0A7Y7C660\_9DELT .....  
tr|A0A7Y4JFH2|A0A7Y4JFH2\_MYXXA .....  
tr|A0A4Y6CZQ9|A0A4Y6CZQ9\_MYXXA .....

```

tr|A0A7Y4IKV5|A0A7Y4IKV5_MYXXA .....
tr|A0A511HHB0|A0A511HHB0_9DELT .....
tr|A0A4Y6CKY7|A0A4Y6CKY7_MYXXA .....
tr|Q1D1F2|Q1D1F2_MYXXD .....
tr|A0A7Y4MA14|A0A7Y4MA14_MYXXA .....
tr|A0A7T8Y4N9|A0A7T8Y4N9_MYXXA .....
tr|L7UE67|L7UE67_MYXSD .....
tr|A0A511T9X1|A0A511T9X1_MYXFU .....
tr|A0A7Y7C9C4|A0A7Y7C9C4_9DELT .....
tr|A0A540X7W8|A0A540X7W8_9DELT .....
tr|A0A3A5FK19|A0A3A5FK19_9DELT .....
tr|A0A3A8JQL9|A0A3A8JQL9_9DELT .....
tr|A0A7Y4NFA4|A0A7Y4NFA4_9DELT .....
tr|A0A3A8HDQ7|A0A3A8HDQ7_9DELT .....
tr|A0A3A8GR90|A0A3A8GR90_9DELT .....
tr|A0A3A8SBD7|A0A3A8SBD7_9DELT .....
tr|A0A3A8T0I8|A0A3A8T0I8_9DELT .....
tr|A0A7X5BU07|A0A7X5BU07_9DELT .....
tr|A0A7Y1RVL2|A0A7Y1RVL2_9DELT .....
tr|A0A3A8THN2|A0A3A8THN2_9DELT .....
tr|A0A7Y1RX76|A0A7Y1RX76_9DELT .....
tr|A0A3A8RA58|A0A3A8RA58_9DELT .....
tr|A0A410RPB6|A0A410RPB6_CORCK .....
tr|A0A7Y4J474|A0A7Y4J474_CORCK .....
tr|A0A3A8I9Z6|A0A3A8I9Z6_9DELT .....
tr|H8MKE9|H8MKE9_CORCM .....
tr|A0A3A8H102|A0A3A8H102_9DELT .....
tr|A0A554FW33|A0A554FW33_9DELT .....
tr|A0A3A8NPC0|A0A3A8NPC0_9DELT .....
tr|A0A3A8JUV3|A0A3A8JUV3_9DELT .....
tr|A0A3A8NEX6|A0A3A8NEX6_9DELT .....
tr|A0A3A8JEU8|A0A3A8JEU8_9DELT .....
tr|A0A3A8LI76|A0A3A8LI76_9DELT .....
tr|A0A085WXN8|A0A085WXN8_9DELT .....
tr|A0A2T4VOM5|A0A2T4VOM5_9DELT .....
tr|A0A0G2ZSW5|A0A0G2ZSW5_9DELT .....
tr|A0A3M2DKY0|A0A3M2DKY0_9DELT .....
tr|A0A661NQ58|A0A661NQ58_9DELT .....
tr|A0A520YD99|A0A520YD99_9DELT PRVSA
tr|A0A7Y3BRE4|A0A7Y3BRE4_9DELT PRVSA
tr|A0A2D9TF90|A0A2D9TF90_9DELT SARP.
tr|A0A2E0TP32|A0A2E0TP32_9DELT .....
tr|A0A2E4Y3V1|A0A2E4Y3V1_9PROT .....
tr|A0A2E6VRH4|A0A2E6VRH4_9DELT .....
tr|A0A1F9FB59|A0A1F9FB59_9DELT .....

```
